# Supplementary material for: BCL-2 Inhibition via Venetoclax at ART Initiation Induces Long-Term Reduction of the Intact SIV Reservoir
Source: Research Square preprint supplement (doi:10.21203/rs.3.rs-7060088/v1), 2025-07-14
Supplement: Supplementary file 1 [file 318b8a139bf0692944ee62b5.xlsx]

## Sheet: VAvsA.D25
source	pathway	pval	padj	log2err	ES	NES	size	leadingEdge
REACTOME	REACTOME_INNATE_IMMUNE_SYSTEM	1e-50	7.05033e-47		0.515679	2.58532	768	CLU, PPBP, MCEMP1, TLR5, ALOX5, GCA, S100A12, S100A9, PTAFR, ALDH3B1, RAB3D, FCGR1A, CCR2, PYGL, HCK, VNN1, CYFIP1, SERPINA1, FGR, TNIP2, RASGRP4, TREM2, S100A8, FPR1, HK3, MEFV, PLAU, HMOX1, LCN2, STOM, LGALS3, MGST1, NCF2, RAB31, STING1, PLAUR, SLC11A1, ATP6V0D2, SERPINB1, CD93, UBE2M, MVP, CTSD, NOD2, FPR2, CTSB, TNFAIP6, PSAP, CASP4, QPCT, PYCARD, ITGAM, CARD9, CD68, CD300A, CXCL1, GSDME, GRN…
REACTOME	REACTOME_NEUTROPHIL_DEGRANULATION	1.15136e-50	7.05033e-47	1.85405	0.618828	2.9799	381	PPBP, MCEMP1, ALOX5, GCA, S100A12, S100A9, PTAFR, ALDH3B1, RAB3D, PYGL, VNN1, CYFIP1, SERPINA1, FGR, S100A8, FPR1, HK3, PLAU, LCN2, STOM, LGALS3, MGST1, RAB31, STING1, PLAUR, SLC11A1, SERPINB1, CD93, MVP, CTSD, FPR2, CTSB, TNFAIP6, PSAP, QPCT, PYCARD, ITGAM, CD68, CD300A, CXCL1, GRN, IMPDH1, FCN1, RETN, PLD1, VCL, SIGLEC5, FGL2, CTSC, S100P, ITGAV, CRISPLD2, ANPEP, P2RX1, TLR2, CREG1, IDH1, ASAH1…
GOBP	GOBP_INFLAMMATORY_RESPONSE	2.3062e-39	9.41467e-36	1.63442	0.531099	2.61213	515	PPBP, CCL23, TLR5, ADM, ALOX5, CX3CR1, S100A12, S100A9, PTGES, PTAFR, FCGR1A, CCR2, ADGRE2, HCK, VNN1, SELP, SERPINA1, FGR, TNIP2, TREM2, STAB1, S100A8, FPR3, FPR1, MEFV, HMOX1, LILRA5, ALOX5AP, SBNO2, FCGR2B, SPHK1, STING1, SLC11A1, THBS1, OSM, NOD2, FPR2, TNFAIP6, CD163, CASP4, TIMP1, PYCARD, CARD9, CD68, TNFRSF1A, LILRB4, CXCL1, DAGLB, LDLR, GRN, AIF1, ZYX, IL1RAP, CCL2, IGFBP4, CCL20, CTSC, L…
GOBP	GOBP_DEFENSE_RESPONSE	1.15824e-35	3.54625e-32	1.55654	0.432641	2.18747	1020	CLU, PPBP, CCL23, TLR5, MARCO, ADM, BATF, ALOX5, CX3CR1, S100A12, S100A9, PTGES, PTAFR, FCGR1A, CCR2, CD300C, ADGRE2, HCK, VNN1, SELP, SERPINA1, FGR, TNIP2, TREML1, RAB20, EMILIN2, TREM2, STAB1, S100A8, FPR3, FPR1, MEFV, MSRB1, HMOX1, LCN2, LGALS3, LILRA5, ALOX5AP, SBNO2, FCGR2B, NCF2, NECTIN2, SPHK1, STING1, SLC11A1, THBS1, OSM, NOD2, HTRA1, FPR2, ANXA3, TNFAIP6, CD163, DAPK1, CASP4, TIMP1, PYCA…
GOBP	GOBP_RNA_PROCESSING	1.15918e-30	2.83929e-27	1.43903	-0.365498	-2.21013	865	SCAF8, RIOK2, METTL18, RPRD2, AKAP17A, SBDS, ZNF473, INTS6, SMAD3, CSTF2T, TRMT12, ELP5, PLRG1, TRMT61A, PDE12, RSL1D1, ABT1, SF1, CACTIN, FASTKD1, SYF2, HNRNPU, HNRNPA0, MTO1, CNOT6L, RBM5, CPSF7, WBP11, VIRMA, SNORA2C, RBM38, PRPF38A, MOCS3, CASC3, FASTKD5, TENT2, CPSF6, INTS12, THUMPD1, CDK13, SCAF4, RAMAC, BCAS2, CLK4, MAK16, SRSF8, SF3B4, ERI1, SRSF6, AAR2, NSUN2, URB1, SLC38A2, LAS1L, PPWD1…
GOBP	GOBP_MRNA_METABOLIC_PROCESS	8.43485e-30	1.72169e-26	1.41728	-0.41448	-2.43804	587	SCAF8, CNOT8, RPRD2, AKAP17A, TENT5C, ZNF473, ZC3HAV1, ZBTB1, SMG8, CSTF2T, PLRG1, TRMT61A, PDE12, GTPBP1, TAF1, SF1, CACTIN, FASTKD1, SYF2, HNRNPU, HNRNPA0, CNOT6L, RBM5, ZFP36L2, CPSF7, WBP11, VIRMA, RBM38, PRPF38A, CASC3, CSDE1, FASTKD5, TENT2, CPSF6, CDK13, SCAF4, RAMAC, BCAS2, SRSF8, SF3B4, ERI1, SRSF6, PELO, AAR2, GSPT1, NSUN2, PPWD1, TOB1, SF3B1, ATF4, WDR33, ROCK2, SRSF2, PUM1, DHX35, ZHX…
GOBP	GOBP_MYELOID_LEUKOCYTE_ACTIVATION	1.73391e-26	3.0336e-23	1.3345	0.627088	2.81976	179	CLU, BATF, CX3CR1, S100A12, PTAFR, CCR2, ADGRE2, DYSF, FGR, TNIP2, TREM2, HMOX1, SBNO2, FCGR2B, NECTIN2, SPHK1, SLC11A1, THBS1, CD93, FPR2, ANXA3, PYCARD, ITGAM, LILRB4, CD300A, SPI1, LDLR, GRN, IFNGR2, AIF1, GATA2, FES, CTSC, CD300LF, TLR2, VSIG4, NOTCH2, IL18, LTBR, AZU1, FN1, CCL3, LYN, IL10, C5AR1, PLSCR1, TYROBP, FCER1G, TLR4, PRAM1, NR1H3, CEBPA, TLR6, TREX1, ADORA2B, TLR1, GAB2, CXCL6, APP…
GOBP	GOBP_IMMUNE_RESPONSE	4.32528e-26	6.62146e-23	1.32672	0.394076	1.99126	1075	CLU, PPBP, CCL23, TLR5, MARCO, BATF, ALOX5, CX3CR1, S100A12, TRPM4, S100A9, PTAFR, FCGR1A, CCR2, ADGRE2, HCK, DYSF, VNN1, FGR, TNIP2, TREML1, RAB20, ADAMDEC1, TREM2, S100A8, FPR3, FPR1, MEFV, MSRB1, HMOX1, LCN2, LGALS3, LILRA5, SBNO2, FCGR2B, NCF2, NECTIN2, STING1, SLC11A1, THBS1, LST1, OSM, NOD2, FPR2, ADGRE1, ANXA3, HLX, DAPK1, ALCAM, CASP4, PYCARD, ITGAM, CARD9, CD68, LILRB4, CD300A, TNFSF12, …
GOBP	GOBP_LOCOMOTION	5.19309e-26	7.06665e-23	1.31889	0.385725	1.95425	1132	PPBP, CCL23, EMB, ALOX5, NRG1, CX3CR1, CD9, S100A12, TRPM4, S100A9, PTAFR, ENG, NIBAN2, CCR2, GLUL, ADGRE2, SOD2, HCK, SELP, CYFIP1, FGR, ITGB5, EMILIN2, TREM2, S100A8, FPR3, FPR1, PLAU, HMOX1, LGALS3, GRB10, SPHK1, NRP1, PLAUR, THBS1, CDC42BPA, BVES, MERTK, NOD2, FPR2, MCTP1, ANXA3, TNFAIP6, ALCAM, TIMP1, PYCARD, CD300A, TNFSF12, CXCL1, PSTPIP2, SPI1, DOCK4, CLDN5, GRN, AIF1, PLD1, VCL, CD151, H…
GOBP	GOBP_RESPONSE_TO_BACTERIUM	1.33127e-24	1.63041e-21	1.2871	0.507271	2.44338	378	PPBP, TLR5, ADM, CX3CR1, S100A12, S100A9, PTAFR, PYGL, SOD2, HCK, SELP, FGR, TNIP2, EMILIN2, TREM2, FAM20A, STAB1, S100A8, LCN2, SBNO2, FCGR2B, SLC11A1, NOD2, FPR2, ANXA3, PYCARD, CARD9, CD68, TNFRSF1A, CXCL1, SPI1, GRN, BAIAP2, CCL2, IRAK3, CCL20, LY96, BCL3, NAIP, TLR2, CASP1, NOTCH2, IL18, SERPINE1, CD14, RNASE6, TSPO, AZU1, COCH, TRIB1, CCL3, CXCL3, LYN, PTGER2, CD180, THBD, IL10, SRC, TNFRSF…
GOBP	GOBP_REGULATION_OF_TRANSPORT	2.6098e-24	2.90565e-21	1.27903	0.385944	1.9526	1087	CLU, ABCG4, ALOX5, NRG1, WLS, TRPM4, PTGES, PTAFR, RAB3D, CCR2, P2RY2, GLUL, ADGRE2, HCK, DYSF, CYFIP1, FGR, TREM2, S100A8, HMOX1, STOM, LGALS3, LILRA5, GRB10, FCGR2B, RAB31, SPHK1, NRP1, SLC31A2, SLC11A1, THBS1, TMEM37, OSM, BVES, MERTK, NOD2, FPR2, MCTP1, HK2, DAPK1, PYCARD, ITGAM, KCNK13, TNFRSF1A, CD300A, SPI1, FCN1, IFNGR2, RETN, PLD1, PGAP1, CD151, ICA1, HES1, GATA2, FES, CCL2, KCNMB1, HFE,…
GOBP	GOBP_CELL_MIGRATION	3.67611e-24	3.75177e-21	1.27091	0.396415	2.00156	953	PPBP, CCL23, ALOX5, NRG1, CX3CR1, CD9, S100A12, TRPM4, S100A9, PTAFR, ENG, CCR2, GLUL, ADGRE2, SOD2, HCK, SELP, FGR, ITGB5, EMILIN2, TREM2, S100A8, PLAU, HMOX1, LGALS3, GRB10, SPHK1, NRP1, THBS1, CDC42BPA, BVES, MERTK, NOD2, FPR2, MCTP1, ANXA3, TNFAIP6, TIMP1, PYCARD, CD300A, TNFSF12, CXCL1, PSTPIP2, SPI1, DOCK4, CLDN5, GRN, AIF1, VCL, CD151, HES1, GATA2, CCL2, CCL20, LRP1, S100P, CXCL16, CD300H,…
GOBP	GOBP_CHROMOSOME_ORGANIZATION	4.81163e-24	4.53292e-21	1.27091	-0.341317	-2.06833	809	HLTF, RIOK2, BRD2, TLK1, CHAMP1, BRPF3, ZBTB1, SMARCA5, TSPYL2, NAP1L2, RIOX1, TSPYL1, GATAD1, KANSL2, KLF2, ZMYND11, CDC23, PPM1D, WAC, EMSY, STAG1, HNRNPU, PIBF1, ACTR8, KANSL1, CHTF18, NUP107, CHD2, MIS12, TERB1, SIRT1, RESF1, PRKAA1, TLK2, RBL2, WAPL, RPA2, STAG2, HJURP, TERF2, PELO, EHMT2, ING3, KAT6A, RIF1, SPTY2D1, APBB1, MTA3, SMYD5, TTI1, MRE11, RAD21, GATA3, BUB3, KDM4C, KAT7, DCAF1, NU…
GOBP	GOBP_BIOLOGICAL_PROCESS_INVOLVED_IN_INTERSPECIES_INTERACTION_BETWEEN_ORGANISMS	1.13104e-23	9.89417e-21	1.26274	0.389945	1.97171	998	CLU, PPBP, CCL23, TLR5, MARCO, ADM, BATF, CX3CR1, S100A12, S100A9, PTAFR, FCGR1A, PYGL, SOD2, HCK, VNN1, SELP, FGR, TNIP2, TREML1, RAB20, ITGB5, EMILIN2, TREM2, FAM20A, STAB1, S100A8, MEFV, MSRB1, LCN2, STOM, LGALS3, LILRA5, SBNO2, FCGR2B, NCF2, NECTIN2, STING1, NRP1, SLC11A1, NOD2, HTRA1, FPR2, CTSB, ANXA3, SCARB2, DAPK1, CASP4, PYCARD, ITGAM, CARD9, CD68, TNFRSF1A, CXCL1, SPI1, GSDME, LDLR, GRN…
GOBP	GOBP_NEGATIVE_REGULATION_OF_NUCLEOBASE_CONTAINING_COMPOUND_METABOLIC_PROCESS	1.33422e-23	1.08935e-20	1.25451	-0.317096	-1.97838	1026	TGIF1, SMAD7, SCAF8, ZNF541, ZBTB18, NR1D2, SUFU, NFATC3, TENT5C, JUND, ZBTB1, ID3, SMAD3, IKZF5, BCLAF1, TXNIP, IRF1, MXI1, TOB2, SIAH2, RIOX1, GFI1, PDCD4, SCML4, ZHX1, ZNF263, KLF2, ZMYND11, SP3, NRIP1, PHF12, TDP2, PHAX, TAF1, SF1, HNRNPU, HNRNPA0, USP47, LBH, ZNF256, PBXIP1, GADD45A, SIN3B, ZNF12, ZNF24, SMURF2, BEND5, ZNF343, FST, COPS2, SIRT1, ZBTB4, CSDE1, SCML2, TENT2, PER3, EID2B, ZBTB1…
GOBP	GOBP_NEGATIVE_REGULATION_OF_BIOSYNTHETIC_PROCESS	9.60728e-23	7.35378e-20	1.2379	-0.305735	-1.90482	1118	TGIF1, ITM2C, SMAD7, SCAF8, ZNF541, ZBTB18, NR1D2, CNOT8, SUFU, NFATC3, JUND, ZBTB1, ID3, SMAD3, IKZF5, BCLAF1, TXNIP, TSPYL2, IRF1, MXI1, TOB2, SIAH2, RIOX1, GFI1, PDCD4, SCML4, ZHX1, ZNF263, KLF2, ZMYND11, SP3, NRIP1, PHF12, PAIP2B, PDE12, TDP2, TAF1, SF1, HNRNPU, PIBF1, USP47, LBH, ZNF256, PBXIP1, GADD45A, SIN3B, CNOT6L, ZNF12, ZNF24, ZFP36L2, TRAP1, SMURF2, RNF139, BEND5, ZNF343, IREB2, FST, …
GOBP	GOBP_RESPONSE_TO_OXYGEN_CONTAINING_COMPOUND	1.16975e-22	8.42703e-20	1.2295	0.382744	1.93483	1056	CLU, PPBP, ADM, CX3CR1, TRPM4, S100A9, PTAFR, AQP3, P2RY2, GLUL, SOD2, HCK, HTR7, AQP9, SELP, CYFIP1, TNIP2, TBXAS1, TREM2, S100A8, HMOX1, GRB10, MGST1, GUCY1B1, SBNO2, FCGR2B, RAB31, SPHK1, VDR, SLC11A1, THBS1, SLC1A3, NOD2, FPR2, DAPK1, CASP4, TIMP1, PYCARD, CARD9, CD68, CXCL1, SPI1, MMP19, ALDH1A1, LDLR, CLDN5, RETN, AIF1, HES1, FES, BAIAP2, CCL2, KCNMB1, IRAK3, LRP1, LY96, AGTRAP, P2RX1, FOSL…
GOBP	GOBP_MRNA_PROCESSING	1.47224e-22	1.0017e-19	1.2295	-0.431493	-2.41974	394	SCAF8, RPRD2, AKAP17A, ZNF473, CSTF2T, PLRG1, PDE12, SF1, CACTIN, SYF2, HNRNPU, HNRNPA0, CNOT6L, RBM5, CPSF7, WBP11, VIRMA, RBM38, PRPF38A, CASC3, FASTKD5, TENT2, CPSF6, CDK13, SCAF4, RAMAC, BCAS2, SRSF8, SF3B4, SRSF6, AAR2, PPWD1, SF3B1, WDR33, SRSF2, DHX35, THOC3, EIF4A3, DDX20, PAPOLG, PAXBP1, BUD31, RBFOX2, METTL14, CDC5L, DAZAP1, RBM19, POLR2D, CLP1, HNRNPK, NUDT21, TFIP11, CDC73, RBM7, RBM1…
GOBP	GOBP_VESICLE_MEDIATED_TRANSPORT	3.33747e-22	2.15126e-19	1.22105	0.373218	1.88917	1106	CLU, MARCO, ADM, MYO7A, CD9, PTAFR, RAB3D, FCGR1A, CCR2, ADGRE2, HCK, DYSF, SNX10, CYFIP1, FGR, RAB20, TREM2, STAB1, LDLRAD3, ABCC4, HHIPL1, HMOX1, LGALS3, FCGR2B, NCF2, RAB31, CD163L1, SPHK1, WIPI1, NRP1, MSR1, SLC11A1, RIN1, THBS1, ARAP3, BVES, CD93, MERTK, NOD2, FPR2, MCTP1, ANXA3, SCARB2, CD163, PYCARD, ITGAM, LILRB4, CD300A, SPI1, LDLR, FCN1, AIF1, PLD1, PGAP1, CD151, GATA2, FES, CCL2, HFE, …
bioplanet	bioplanet_Gene expression	1.24504e-21	7.624e-19	1.20398	-0.341802	-2.06309	754	TGIF1, SMAD7, NR1D2, CNOT8, MED23, ZNF394, ZNF473, SMAD3, SMG8, ZNF250, MED17, ZNF263, NARS2, PHAX, TAF1, GTF3C5, HNRNPU, HNRNPA0, ZNF256, CNOT6L, ZNF12, RBM5, NUP107, CPSF7, SMURF2, ZNF343, NUP160, CASC3, SNAPC5, MAML2, ZNF616, NUP43, ZNF274, SF3B4, NOTCH4, SRSF6, EHMT2, ZNF92, YWHAZ, CCAR1, ZNF506, ZNF317, ZNF350, ZNF43, ZNF143, TNPO1, SF3B1, SRP68, SRSF2, ZSCAN32, ZNF551, EIF4A3, MAML1, CNOT2,…
HALLMARK	HALLMARK_COAGULATION	7.68399e-21	4.48123e-18	1.17789	0.720805	2.88816	83	CLU, CD9, VWF, SERPINA1, PLAU, THBS1, HTRA1, CTSB, TIMP1, MMP1, LRP1, LGMN, DUSP6, SERPINE1, FN1, SH2B2, THBD, MMP9, ITGA2, PF4, ANG, COMP, LTA4H, CFD, F3, PLEK, SPARC, LAMP2, GP1BA, P2RY1, GP9, FURIN, OLR1, DPP4, ADAM9, C3, GSN, CPQ, KLF7, CFH, MMP2, TFPI2, PROS1, MSRB2, SERPING1, SIRT2, GNB2, WDR1, SERPINB2, F2RL2, CSRP1, CAPN2, CTSH
GOBP	GOBP_PHAGOCYTOSIS	8.30945e-21	4.62572e-18	1.17789	0.592527	2.66517	181	MARCO, MYO7A, FCGR1A, CCR2, HCK, DYSF, FGR, RAB20, TREM2, FCGR2B, NCF2, RAB31, SPHK1, MSR1, SLC11A1, THBS1, CD93, MERTK, NOD2, FPR2, ANXA3, PYCARD, ITGAM, CD300A, LDLR, FCN1, AIF1, GATA2, CCL2, LRP1, CD300LF, ITGAV, CLEC7A, TLR2, CD14, NCF4, AZU1, LYN, SRC, PLSCR1, TYROBP, FCER1G, TLR4, CD36, ITGA2, PTX3, NR1H3, TREX1, YES1, IL1B, CYBA, CORO1C, RAB39A, ICAM3, LMAN2, ANXA11, IL15RA, MYD88, GAS6, F…
REACTOME	REACTOME_HEMOSTASIS	1.07819e-20	5.74112e-18	1.17789	0.467787	2.2744	425	CLU, PPBP, CD9, TFPI, F13A1, VWF, SELP, SERPINA1, FGR, ABCC4, LHFPL2, PLAU, GUCY1B1, PLAUR, THBS1, MERTK, SLC7A7, PSAP, TIMP1, MMP1, ITGAM, DOCK4, DAGLB, GNB4, VCL, GATA2, KCNMB1, ITGAV, P2RX1, MPIG6B, GUCY1A1, PRKAR2B, SERPINE1, PRCP, TEK, DOCK5, MAFG, HGF, FN1, SH2B2, LYN, THBD, DAGLA, SDC3, SRC, PTPN1, ITGA2B, FCER1G, P2RY12, ANXA5, ECM1, TUBB1, CD36, ITGA2, PF4V1, PF4, SLC16A3, TOR4A, GNAQ, V…
GOBP	GOBP_LEUKOCYTE_MIGRATION	1.61727e-20	8.25279e-18	1.16907	0.525649	2.46178	267	PPBP, CCL23, ALOX5, CX3CR1, CD9, S100A12, TRPM4, S100A9, PTAFR, CCR2, ADGRE2, HCK, SELP, TREM2, S100A8, HMOX1, LGALS3, THBS1, NOD2, FPR2, TNFAIP6, PYCARD, CD300A, CXCL1, SPI1, AIF1, CCL2, CCL20, CXCL16, CD300H, LGMN, CSF3R, SERPINE1, IL1R1, AZU1, CCL3, CXCL3, LYN, IL10, SRC, TNFRSF11A, C5AR1, C3AR1, MMP9, CCL8, FCER1G, P2RY12, ECM1, ITGA2, PF4V1, CCR1, PF4, VEGFA, C5AR2, PLCB1, IL1A, CSF1R, CCL7,…
GOBP	GOBP_TAXIS	4.46852e-20	2.18904e-17	1.16018	0.479144	2.30418	374	PPBP, CCL23, EMB, ALOX5, NRG1, CX3CR1, S100A12, TRPM4, S100A9, PTAFR, NIBAN2, CCR2, ADGRE2, CYFIP1, TREM2, S100A8, FPR3, FPR1, PLAU, LGALS3, NRP1, PLAUR, THBS1, NOD2, FPR2, TNFAIP6, ALCAM, CXCL1, SPI1, DOCK4, AIF1, PLD1, FES, CCL2, CCL20, CXCL16, CD300H, ITGAV, PLP2, FOSL1, LGMN, PLXNB2, NOTCH2, CSF3R, SERPINE1, AZU1, HGF, CCL3, CXCL3, LYN, GFRA3, IL10, GPNMB, TNFRSF11A, C5AR1, C3AR1, CCL8, FCER1…
GOBP	GOBP_CHEMICAL_HOMEOSTASIS	5.59983e-20	2.63773e-17	1.15122	0.403663	2.01828	737	CCL23, ABCG4, ADM, ALOX5, CX3CR1, TRPM4, S100A9, CCR2, AQP3, P2RY2, PYGL, SOD2, AQP9, DMXL2, SNX10, RAB20, TBXAS1, TREM2, FAM20A, S100A8, FPR3, STEAP3, FPR1, HK3, HMOX1, LCN2, SLC31A1, VDR, SLC31A2, SLC11A1, SLC46A1, ATP6V0D2, SLC1A3, FPR2, HK2, UGCG, CYP39A1, CYBRD1, SLC39A4, LDLR, GRN, GATA2, MTCH2, HFE, ITGAV, P2RX1, NOL3, IL18, FKBP1B, PRCP, RHAG, GPR27, TSPO, MAFG, CCL3, LYN, PTGER2, SOAT1, …
GOBP	GOBP_CELLULAR_ION_HOMEOSTASIS	1.09912e-19	4.98552e-17	1.14219	0.459831	2.22842	411	CCL23, ADM, CX3CR1, TRPM4, S100A9, CCR2, P2RY2, DMXL2, RAB20, TBXAS1, S100A8, FPR3, FPR1, HMOX1, LCN2, SLC31A1, VDR, SLC31A2, SLC11A1, SLC46A1, ATP6V0D2, SLC1A3, FPR2, CYBRD1, SLC39A4, GRN, GATA2, HFE, ITGAV, P2RX1, NOL3, FKBP1B, RHAG, MAFG, CCL3, LYN, PTGER2, KCNQ1, ATP6V1A, C5AR1, C3AR1, CCL8, TCIRG1, NPTN, CD36, CCR1, TPCN2, ATP6V0D1, C5AR2, IL1A, ATP2A2, GPR35, MT1X, SLC6A9, WFS1, CCL7, CMKLR…
GOBP	GOBP_RESPONSE_TO_MOLECULE_OF_BACTERIAL_ORIGIN	2.02914e-19	8.87529e-17	1.14219	0.538082	2.50168	232	PPBP, ADM, CX3CR1, S100A9, PTAFR, SOD2, HCK, SELP, TNIP2, TREM2, S100A8, SBNO2, FCGR2B, SLC11A1, NOD2, PYCARD, CARD9, CD68, CXCL1, SPI1, CCL2, IRAK3, LY96, TLR2, CASP1, IL18, SERPINE1, CD14, TSPO, TRIB1, CCL3, CXCL3, LYN, PTGER2, CD180, THBD, IL10, SRC, TNFRSF11A, C5AR1, ACOD1, PDCD1LG2, TNFRSF1B, CSF2RB, TLR4, CD36, SCIMP, PF4V1, SASH1, PF4, LITAF, NR1H3, TLR6, IL1A, TLR1, BMP6, TRIM5, CXCL6, CE…
GOBP	GOBP_CELLULAR_RESPONSE_TO_OXYGEN_CONTAINING_COMPOUND	5.15651e-19	2.17765e-16	1.12391	0.389427	1.95207	776	CLU, PPBP, CX3CR1, TRPM4, PTAFR, P2RY2, SOD2, HCK, HTR7, AQP9, CYFIP1, TNIP2, TREM2, GRB10, MGST1, GUCY1B1, SBNO2, FCGR2B, RAB31, SPHK1, VDR, SLC1A3, NOD2, FPR2, DAPK1, CASP4, PYCARD, CD68, CXCL1, SPI1, ALDH1A1, LDLR, AIF1, HES1, FES, BAIAP2, CCL2, KCNMB1, LRP1, LY96, AGTRAP, CLEC7A, LGMN, TLR2, CASP1, RRAGC, IL18, FKBP1B, SERPINE1, CD14, GPR27, TSPO, TRIB1, HGF, CAMKK2, CCL3, CXCL3, SH2B2, CYBB,…
REACTOME	REACTOME_METABOLISM_OF_RNA	8.02351e-19	3.27546e-16	1.12391	-0.355915	-2.09355	587	RIOK2, CNOT8, ZNF473, SMG8, CSTF2T, TRMT12, NIP7, PLRG1, TRMT61A, PHAX, SF1, SYF2, HNRNPU, HNRNPA0, MTO1, CNOT6L, RBM5, NUP107, CPSF7, WBP11, NUP160, PRPF38A, CASC3, THUMPD1, BCAS2, NUP43, SF3B4, ERI1, XPOT, SRSF6, GSPT1, NSUN2, YWHAZ, CCAR1, LAS1L, PPWD1, TNPO1, SF3B1, WDR33, SRSF2, THOC3, EIF4A3, CNOT2, POLDIP3, DDX20, SMG5, GSPT2, PNRC2, TEX10, BUD31, UTP14C, RPP38, METTL14, CNOT1, HNRNPD, CDC…
GOBP	GOBP_RESPONSE_TO_WOUNDING	1.00773e-18	3.9812e-16	1.11466	0.465147	2.24153	376	ADM, ALOX5, NRG1, CX3CR1, CD9, CCR2, TFPI, SOD2, F13A1, DYSF, VWF, SELP, SERPINA1, TREML1, EMILIN2, TREM2, S100A8, PLAU, HMOX1, PLAUR, SLC11A1, THBS1, SLC1A3, MERTK, PAPSS2, TIMP1, GRN, AIF1, VCL, CD151, ENTPD1, GATA2, P2RX1, CLEC7A, NOL3, MPIG6B, NOTCH2, FKBP1B, SERPINE1, PRCP, TSPO, FN1, MYOF, LYN, THBD, IL10, SRC, CLIC1, RTN4RL2, PLSCR1, TYROBP, FCER1G, HBEGF, P2RY12, ANXA5, TLR4, CD36, ITGA2,…
GOBP	GOBP_MYELOID_LEUKOCYTE_MIGRATION	1.44387e-18	5.41528e-16	1.11466	0.591458	2.62063	156	PPBP, CCL23, CX3CR1, CD9, S100A12, S100A9, CCR2, ADGRE2, TREM2, S100A8, LGALS3, THBS1, NOD2, FPR2, TNFAIP6, CD300A, CXCL1, SPI1, AIF1, CCL2, CCL20, CD300H, LGMN, CSF3R, SERPINE1, IL1R1, AZU1, CCL3, CXCL3, LYN, TNFRSF11A, C5AR1, C3AR1, CCL8, FCER1G, P2RY12, PF4V1, CCR1, PF4, VEGFA, C5AR2, PLCB1, IL1A, CSF1R, CCL7, CMKLR1, CXCL6, ITGA9, IL1B, FUT7, MYD88, DPP4, PLA2G7, ADAM8, SYK, FOLR2, CXCR1, IL6…
GOBP	GOBP_TRANSMEMBRANE_TRANSPORT	1.45917e-18	5.41528e-16	1.11466	0.37826	1.90467	863	PPBP, ABCG4, TRPM6, EMB, TRPM4, PTAFR, CCR2, AQP3, AQP9, SLC50A1, SLC47A1, TREM2, ABCC4, STOM, GRB10, SLC31A1, SLC31A2, SLC11A1, SLC46A1, THBS1, TMEM37, ATP6V0D2, SLC1A3, SLC7A7, HK2, DAPK1, KCNK13, CYBRD1, SLC39A4, IFNGR2, SLC43A3, SLC37A2, SLC22A4, CCL2, KCNMB1, HFE, ITGAV, PLP2, SLC35E4, P2RX1, NOL3, SLC22A15, TMEM150C, FKBP1B, RHAG, CTSS, SLC35E3, CCL3, CYBB, LYN, KCNQ1, SLC18B1, ACSL1, G6PD,…
GOBP	GOBP_BIOLOGICAL_ADHESION	1.6712e-18	6.01977e-16	1.11466	0.381163	1.91875	862	JAG2, EMB, ALOX5, ZFHX3, CX3CR1, CD9, S100A9, PTAFR, ENG, CCR2, CSTA, ADGRE2, HCK, VNN1, VWF, SELP, ADAMDEC1, ITGB5, EMILIN2, STAB1, S100A8, PLAU, LGALS3, FCGR2B, NECTIN2, NRP1, PLAUR, EGFL7, THBS1, BVES, CD93, MERTK, NOD2, FPR2, ADGRE1, TNFAIP6, HLX, ALCAM, PYCARD, ITGAM, LILRB4, CD300A, SPI1, CLDN5, AIF1, VCL, CD151, SIGLEC5, ENTPD1, HES1, ZYX, FES, FGL2, IL1RAP, BAIAP2, CCL2, HFE, ITGAV, CLEC7…
GOBP	GOBP_DEFENSE_RESPONSE_TO_OTHER_ORGANISM	2.56322e-18	8.96906e-16	1.10534	0.405907	2.0244	653	CLU, PPBP, CCL23, TLR5, MARCO, BATF, CX3CR1, S100A12, S100A9, FCGR1A, HCK, VNN1, SELP, FGR, TREML1, RAB20, EMILIN2, TREM2, STAB1, S100A8, MEFV, MSRB1, LCN2, LGALS3, LILRA5, FCGR2B, NCF2, NECTIN2, STING1, SLC11A1, NOD2, HTRA1, FPR2, ANXA3, DAPK1, CASP4, PYCARD, ITGAM, CARD9, TNFRSF1A, SPI1, GRN, CDC42EP2, FCN1, IFNGR2, AIF1, ZYX, FES, FGL2, IL1RAP, CCL2, IRAK3, CCL20, BCL3, STMP1, CXCL16, CLEC7A, …
GOBP	GOBP_ION_HOMEOSTASIS	2.79608e-18	9.5121e-16	1.10534	0.430437	2.11319	486	CCL23, ADM, CX3CR1, TRPM4, S100A9, CCR2, P2RY2, SOD2, DMXL2, SNX10, RAB20, TBXAS1, FAM20A, S100A8, FPR3, STEAP3, FPR1, HMOX1, LCN2, SLC31A1, VDR, SLC31A2, SLC11A1, SLC46A1, ATP6V0D2, SLC1A3, FPR2, CYBRD1, SLC39A4, GRN, GATA2, HFE, ITGAV, P2RX1, NOL3, FKBP1B, RHAG, TSPO, MAFG, CCL3, LYN, PTGER2, KCNQ1, ATP6V1A, SRC, C5AR1, C3AR1, CCL8, TCIRG1, NPTN, CD36, SLC25A37, CCR1, TPCN2, ATP6V0D1, C5AR2, IL…
HALLMARK	HALLMARK_INFLAMMATORY_RESPONSE	4.97293e-18	1.64604e-15	1.09593	0.589873	2.60751	153	MARCO, ADM, PTAFR, RNF144B, P2RY2, AQP9, STAB1, FPR1, MEFV, SLC31A1, SPHK1, SLC31A2, PLAUR, MSR1, OSM, NOD2, ADGRE1, TNFAIP6, TIMP1, LDLR, IFNGR2, CCL2, CCL20, TLR2, CSF3R, IL18, SERPINE1, LIF, CD14, IL1R1, CYBB, PTPRE, LYN, PTGER2, IL10, C5AR1, C3AR1, TNFRSF1B, HBEGF, IL1A, ATP2A2, ADORA2B, TLR1, CCL7, CMKLR1, HIF1A, CXCL6, ATP2C1, F3, SCARF1, CCRL2, IL1B, GP1BA, NLRP3, GNA15, CDKN1A, BEST1, SGM…
GOBP	GOBP_POSITIVE_REGULATION_OF_MULTICELLULAR_ORGANISMAL_PROCESS	8.14139e-18	2.62389e-15	1.08644	0.371847	1.87399	924	CLU, TLR5, ADM, BATF, ALOX5, CX3CR1, TRPM4, PTAFR, ENG, NIBAN2, CCR2, P2RY2, VNN1, CYFIP1, FGR, EMILIN2, TNFRSF8, TBXAS1, TREM2, MEFV, HMOX1, LCN2, LGALS3, LILRA5, GRB10, SPHK1, STING1, NRP1, VDR, SLC11A1, THBS1, OSM, NOD2, ANXA3, HK2, HLX, SPINT1, PYCARD, CARD9, LILRB4, TNFSF12, GRN, FCN1, RETN, AIF1, MAPK11, HES1, GATA2, FES, IL1RAP, BAIAP2, IRAK3, LRP1, LY96, BCL3, ENO1, STMP1, CLEC7A, DAB2, T…
GOBP	GOBP_RESPONSE_TO_CYTOKINE	1.39985e-17	4.39589e-15	1.07687	0.406869	2.02029	618	PPBP, CCL23, ABCG4, CX3CR1, CCR2, HCK, SELP, SNX10, TNIP2, RAB20, TREM2, MEFV, LILRA5, SBNO2, SPHK1, STING1, SLC11A1, THBS1, OSM, HK2, UGCG, DAPK1, CASP4, TIMP1, PYCARD, TNFRSF1A, LILRB4, CXCL1, SPI1, GSDME, LILRA6, CDC42EP2, IFNGR2, AIF1, MAPK11, HES1, ZYX, IL1RAP, CCL2, IRAK3, CTBP2, CCL20, CD300LF, LILRA1, CXCL16, PLP2, FOSL1, NOL3, NAIP, TLR2, CASP1, CSF3R, ASAH1, IL18, CD14, NFIL3, IL1R1, CC…
GOBP	GOBP_REGULATION_OF_RESPONSE_TO_EXTERNAL_STIMULUS	1.632e-17	4.99677e-15	1.07687	0.403491	2.00965	644	ALOX5, CX3CR1, CD9, S100A12, S100A9, PTGES, CCR2, TFPI, HCK, FGR, EMILIN2, TREM2, S100A8, MEFV, PLAU, LILRA5, ALOX5AP, SBNO2, FCGR2B, NECTIN2, SPHK1, STING1, NRP1, VDR, THBS1, OSM, NOD2, HTRA1, FPR2, TNFAIP6, CASP4, PYCARD, CARD9, TNFRSF1A, SPI1, DAGLB, LDLR, GRN, FCN1, AIF1, ZYX, FGL2, CCL2, IRAK3, CTSC, LY96, CLEC7A, LGMN, TLR2, METRNL, VSIG4, CASP1, RHBDF2, IL18, FKBP1B, SERPINE1, TEK, IL1R1, …
GOBP	GOBP_DEFENSE_RESPONSE_TO_BACTERIUM	2.39632e-17	7.15798e-15	1.07687	0.616068	2.6464	128	PPBP, TLR5, S100A12, S100A9, SELP, FGR, EMILIN2, TREM2, STAB1, S100A8, LCN2, SLC11A1, NOD2, FPR2, ANXA3, PYCARD, CARD9, TNFRSF1A, GRN, CCL20, BCL3, NAIP, TLR2, NOTCH2, SERPINE1, RNASE6, AZU1, COCH, IL10, C5AR1, LYZ, FCER1G, TLR4, CD36, NLRC4, CFP, ANG, TLR6, MPEG1, CXCL6, CEBPB, GSDMD, CYBA, MYD88, PRKCD, CAMP, SYK, PLAC8, IL6, RNF213, TNF, ARG2, ADAM17, CLEC4E, TREM1, STAB2, SPN, SYT11, SIRT2, M…
GOBP	GOBP_REGULATION_OF_INFLAMMATORY_RESPONSE	2.51657e-17	7.3382e-15	1.07687	0.508869	2.3748	248	ALOX5, S100A12, S100A9, PTGES, CCR2, HCK, FGR, TREM2, S100A8, MEFV, LILRA5, ALOX5AP, SBNO2, FCGR2B, SPHK1, STING1, OSM, NOD2, FPR2, TNFAIP6, CASP4, PYCARD, TNFRSF1A, DAGLB, LDLR, GRN, ZYX, CTSC, TLR2, METRNL, CASP1, RHBDF2, IL18, SERPINE1, TEK, IL1R1, HGF, AOAH, CCL3, LYN, IL10, DAGLA, SRC, TNFRSF11A, ACOD1, LPL, MMP9, MGST2, TNFRSF1B, TLR4, ITGA2, NR1H3, CEBPA, TREX1, ADORA2B, KLF4, YES1, PIK3AP…
GOBP	GOBP_ION_TRANSPORT	3.88668e-17	1.10698e-14	1.06721	0.373486	1.87904	850	TRPM6, EMB, TRPM4, PTGES, PTAFR, CCR2, AQP9, SLC47A1, TREM2, ABCC4, STEAP3, LCN2, STOM, LGALS3, LILRA5, MGST1, SLC31A1, VDR, SLC31A2, SLC11A1, SLC46A1, TMEM37, ATP6V0D2, SLC1A3, SLC7A7, PSAP, DAPK1, KCNK13, CYBRD1, SLC39A4, IFNGR2, HES1, SLC37A2, SLC22A4, CCL2, KCNMB1, HFE, ITGAV, PLP2, P2RX1, NOL3, SLC22A15, TMEM150C, FKBP1B, RHAG, CTSS, TSPO, CCL3, CYBB, LYN, KCNQ1, G6PD, SLC39A1, ATP6V1A, TNFR…
GOBP	GOBP_LEUKOCYTE_CHEMOTAXIS	6.21345e-17	1.72946e-14	1.05746	0.569224	2.52658	159	PPBP, CCL23, ALOX5, CX3CR1, S100A12, TRPM4, S100A9, CCR2, ADGRE2, S100A8, LGALS3, THBS1, NOD2, FPR2, TNFAIP6, CXCL1, SPI1, AIF1, CCL2, CCL20, CXCL16, CD300H, LGMN, CSF3R, SERPINE1, AZU1, CCL3, CXCL3, LYN, IL10, TNFRSF11A, C5AR1, C3AR1, CCL8, FCER1G, PF4V1, CCR1, PF4, VEGFA, C5AR2, CSF1R, CCL7, CMKLR1, CXCL6, ITGA9, IL1B, SLC8B1, GAS6, DPP4, PLEC, PLA2G7, ADAM8, TRPM2, SYK, FOLR2, CXCR1, IL6, ADAM…
GOBP	GOBP_CELLULAR_HOMEOSTASIS	8.51432e-17	2.31722e-14	1.05746	0.41017	2.02774	576	CCL23, ADM, CX3CR1, TRPM4, S100A9, CCR2, P2RY2, DMXL2, RAB20, TBXAS1, TREM2, S100A8, FPR3, FPR1, HK3, HMOX1, LCN2, SLC31A1, VDR, SLC31A2, SLC11A1, SLC46A1, ATP6V0D2, SLC1A3, FPR2, HK2, CYBRD1, SLC39A4, GRN, GATA2, CCL2, HFE, ITGAV, P2RX1, NOL3, FKBP1B, RHAG, GPR27, MAFG, CCL3, LYN, PTGER2, KCNQ1, ATP6V1A, C5AR1, DGAT2, C3AR1, CCL8, TCIRG1, BRSK2, UNC13B, NPTN, CD36, CCR1, TPCN2, ATP6V0D1, C5AR2, …
GOBP	GOBP_REGULATION_OF_VESICLE_MEDIATED_TRANSPORT	1.71801e-16	4.57402e-14	1.04763	0.455016	2.18428	369	CLU, PTAFR, RAB3D, CCR2, ADGRE2, HCK, DYSF, FGR, TREM2, HMOX1, LGALS3, FCGR2B, RAB31, SPHK1, NRP1, SLC11A1, BVES, MERTK, NOD2, FPR2, MCTP1, PYCARD, ITGAM, CD300A, SPI1, FCN1, PLD1, PGAP1, CD151, GATA2, FES, CCL2, HFE, LRP1, CD300LF, ITGAV, P2RX1, CLEC7A, DAB2, TLR2, SEPTIN5, SERPINE1, CD14, AZU1, FLOT1, LYN, SRC, SDCBP, PTPN1, PLSCR1, FCER1G, CD36, ITGA2, RAB13, TPCN2, PRAM1, PTX3, NR1H3, VEGFA, …
GOBP	GOBP_POSITIVE_REGULATION_OF_TRANSPORT	2.18333e-16	5.6892e-14	1.04763	0.402985	1.99749	593	CLU, ABCG4, WLS, TRPM4, PTGES, PTAFR, RAB3D, CCR2, P2RY2, GLUL, FGR, TREM2, S100A8, STOM, LGALS3, LILRA5, FCGR2B, RAB31, SLC11A1, MERTK, NOD2, FPR2, PYCARD, ITGAM, FCN1, IFNGR2, RETN, PGAP1, CD151, GATA2, CCL2, KCNMB1, HFE, SCIN, LRP1, CD300LF, P2RX1, CLEC7A, DAB2, TLR2, RHOU, SERPINE1, CD14, GPR27, CTSS, TSPO, AZU1, FLOT1, CCL3, KCNQ1, ACSL1, G6PD, SRC, TNFRSF11A, SDCBP, FRMD4A, PRKCI, FCER1G, U…
REACTOME	REACTOME_SIGNALING_BY_INTERLEUKINS	2.55016e-16	6.50664e-14	1.0377	0.458244	2.19232	348	BATF, ALOX5, S100A12, PTAFR, CCR2, SOD2, HCK, F13A1, TNIP2, FPR1, HMOX1, LCN2, MAOA, OSM, PTPN18, NOD2, TIMP1, MMP1, ITGAM, TNFRSF1A, CXCL1, MAPK11, IL1RAP, CCL2, IRAK3, CCL20, DUSP6, CASP1, RHOU, CSF3R, IL18, LIF, IL1R1, HGF, FN1, CCL3, LYN, IL10, MMP9, IL1RN, TNFRSF1B, CSF2RB, CD36, SOCS2, CEBPD, CCR1, VEGFA, IL1A, CSF1R, PITPNA, GAB2, HIF1A, YES1, PRKACA, MAP3K8, IL13RA1, GSDMD, ANXA2, APP, IL…
REACTOME	REACTOME_RNA_POLYMERASE_II_TRANSCRIPTION	2.97943e-16	7.44675e-14	1.0377	-0.286355	-1.77441	1019	TGIF1, SMAD7, BRD2, NR1D2, CNOT8, NFYA, SESN1, RPRD2, MED23, ZNF394, DYRK2, ZNF473, BRPF3, INTS6, SMAD3, ELF1, TXNIP, CSTF2T, ZNF250, MED17, ZNF263, LBR, MAP2K6, PHAX, CDC23, TAF1, RRAGA, PPM1D, SKP2, ZNF256, GADD45A, CGA, ICE2, SIN3B, CNOT6L, CCNG2, ZNF12, CPSF7, SMURF2, ZNF343, SIRT1, CASC3, SNAPC5, PRKAA1, RGCC, BTG1, INTS12, RBL2, CDK13, PLK2, MAML2, KRBOX4, RPA2, ZNF616, CASP10, ZNF274, TCF7…
bioplanet	bioplanet_Hemostasis pathway	4.56732e-16	1.11872e-13	1.02767	0.459123	2.1942	339	CLU, PPBP, CD9, TFPI, F13A1, VWF, SELP, SERPINA1, FGR, ABCC4, PLAU, PLAUR, THBS1, MERTK, SLC7A7, PSAP, TIMP1, MMP1, ITGAM, DOCK4, DAGLB, GNB4, VCL, GATA2, KCNMB1, ITGAV, P2RX1, PRKAR2B, SERPINE1, PRCP, TEK, DOCK5, MAFG, HGF, FN1, SH2B2, LYN, THBD, DAGLA, SRC, PTPN1, ITGA2B, FCER1G, P2RY12, CD36, ITGA2, PF4V1, PF4, SLC16A3, GNAQ, VEGFA, ATP2A2, MYB, CFD, NFE2, YES1, CAPZB, PRKACA, ARRB1, F3, PLEK,…
GOBP	GOBP_HOMEOSTATIC_PROCESS	7.04841e-16	1.69258e-13	1.02767	0.34273	1.73713	1152	CCL23, ABCG4, ADM, ALOX5, CX3CR1, TRPM4, S100A9, PTGES, RAB3D, CCR2, AQP3, P2RY2, PYGL, SOD2, AQP9, DMXL2, SNX10, RAB20, TBXAS1, TREM2, FAM20A, S100A8, FPR3, STEAP3, FPR1, HK3, HMOX1, LCN2, GRB10, SLC31A1, VDR, SLC31A2, SLC11A1, SLC46A1, ATP6V0D2, SLC1A3, MERTK, NOD2, FPR2, HK2, UGCG, CARD9, CYP39A1, SPI1, CYBRD1, ALDH1A1, SLC39A4, LDLR, CLDN5, GRN, VCL, MAPK11, GATA2, CCL2, MTCH2, HFE, ITGAV, P2…
GOBP	GOBP_EXPORT_FROM_CELL	7.64546e-16	1.79549e-13	1.02767	0.405454	1.99645	537	ADM, ALOX5, WLS, TRPM4, PTGES, PTAFR, ENG, NIBAN2, RAB3D, CCR2, GLUL, ADGRE2, HCK, FGR, SLC47A1, TREM2, ABCC4, STEAP3, HMOX1, FCGR2B, RAB31, OSM, MERTK, MCTP1, ANXA3, ITGAM, TNFRSF1A, CD300A, SPI1, RETN, ICA1, GATA2, FES, PCSK6, HFE, CTBP2, SCIN, STX11, P2RX1, DAB2, TLR2, SEPTIN5, RHBDF2, FKBP1B, LIF, GPR27, CCL3, LYN, KCNQ1, TNFRSF11A, SDCBP, IL1RN, CCL8, FRMD4A, TCIRG1, TNFRSF1B, BRSK2, UNC13B,…
GOBP	GOBP_POSITIVE_REGULATION_OF_LOCOMOTION	7.90998e-16	1.79549e-13	1.02767	0.439827	2.12529	394	CX3CR1, PTAFR, CCR2, SOD2, SELP, FGR, TREM2, PLAU, HMOX1, LGALS3, SPHK1, NRP1, THBS1, BVES, FPR2, ANXA3, TNFAIP6, PYCARD, SPI1, DOCK4, GRN, AIF1, CD151, GATA2, CCL20, CXCL16, ITGAV, CLEC7A, LGMN, DAB2, SERPINE1, TEK, IL1R1, DOCK5, AZU1, HGF, FN1, CCL3, LYN, GPNMB, SRC, C5AR1, C3AR1, MMP9, SDCBP, CCL8, HBEGF, P2RY12, SPAG9, TLR4, ITGA2, SASH1, CCR1, VSIR, ZNF703, SEMA4A, VEGFA, MYLK, IL1A, CSF1R, …
GOBP	GOBP_RESPONSE_TO_LIPID	7.91674e-16	1.79549e-13	1.02767	0.405732	2.00123	552	CLU, PPBP, ADM, CX3CR1, S100A9, PTAFR, ENG, AQP3, TFPI, SOD2, HCK, SELP, TNIP2, TBXAS1, TREM2, S100A8, MGST1, SBNO2, VDR, SLC11A1, THBS1, NOD2, ANXA3, PYCARD, CD68, CXCL1, SPI1, LDLR, AIF1, HES1, GATA2, FES, PAQR7, CCL2, KCNMB1, IRAK3, LY96, FOSL1, DAB2, TLR2, CASP1, IDH1, IL18, SERPINE1, CD14, TSPO, TRIB1, CCL3, CXCL3, CYBB, LYN, PTGER2, CD180, THBD, IL10, ACSL1, SRC, TNFRSF11A, ACOD1, DGAT2, LP…
GOBP	GOBP_CELLULAR_RESPONSE_TO_MOLECULE_OF_BACTERIAL_ORIGIN	9.89238e-16	2.12547e-13	1.01754	0.565875	2.49732	154	PPBP, CX3CR1, PTAFR, HCK, TNIP2, TREM2, SBNO2, FCGR2B, NOD2, PYCARD, CD68, CXCL1, SPI1, CCL2, LY96, TLR2, CASP1, IL18, SERPINE1, CD14, TSPO, TRIB1, CCL3, CXCL3, LYN, CD180, IL10, SRC, ACOD1, PDCD1LG2, TNFRSF1B, TLR4, CD36, SCIMP, PF4V1, SASH1, PF4, LITAF, NR1H3, TLR6, IL1A, TLR1, BMP6, TRIM5, CXCL6, CEBPB, MRC1, EPHB2, GSTP1, IL1B, NLRP3, MAP2K3, LILRA2, MYD88, VIM, ADAM9, TICAM1, CAMP, IL6, TNF,…
GOBP	GOBP_MACROPHAGE_ACTIVATION	9.60901e-16	2.12547e-13	1.01754	0.675355	2.69936	82	CLU, CX3CR1, DYSF, TNIP2, TREM2, SBNO2, FCGR2B, SPHK1, SLC11A1, THBS1, CD93, FPR2, ITGAM, LDLR, GRN, IFNGR2, AIF1, CTSC, TLR2, VSIG4, AZU1, CCL3, IL10, C5AR1, TYROBP, TLR4, NR1H3, CEBPA, TLR6, TREX1, TLR1, APP, IFNGR1, TMEM106A, FER1L5, TICAM1, SYK, TTBK1, IL6, TNF, IFI35, ITGB2, SYT11, PLA2G4A, SUCNR1
GOBP	GOBP_REGULATION_OF_PHAGOCYTOSIS	9.78842e-16	2.12547e-13	1.01754	0.699323	2.7487	74	HCK, DYSF, FGR, TREM2, FCGR2B, RAB31, SPHK1, SLC11A1, MERTK, NOD2, FPR2, PYCARD, CD300A, FCN1, GATA2, CCL2, CD300LF, ITGAV, CLEC7A, TLR2, AZU1, PLSCR1, FCER1G, CD36, ITGA2, PTX3, IL1B, CYBA, LMAN2, IL15RA, GAS6, FER1L5, C3, RAB27A, ATG3, SYK, TNF, ABCA7, SYT11, TGM2, PTPRJ, ANO6, FCN2, CALR
GOBP	GOBP_METAL_ION_HOMEOSTASIS	1.00827e-15	2.12902e-13	1.01754	0.438351	2.11877	398	CCL23, ADM, CX3CR1, TRPM4, S100A9, CCR2, SOD2, SNX10, FAM20A, S100A8, FPR3, STEAP3, FPR1, HMOX1, LCN2, SLC31A1, VDR, SLC31A2, SLC11A1, SLC46A1, SLC1A3, FPR2, CYBRD1, SLC39A4, GATA2, HFE, ITGAV, P2RX1, NOL3, FKBP1B, RHAG, CCL3, LYN, PTGER2, KCNQ1, ATP6V1A, C5AR1, C3AR1, CCL8, TCIRG1, NPTN, CD36, SLC25A37, CCR1, TPCN2, ATP6V0D1, C5AR2, IL1A, ATP2A2, GPR35, MT1X, SLC6A9, WFS1, CCL7, CMKLR1, HIF1A, B…
GOBP	GOBP_NCRNA_METABOLIC_PROCESS	1.1391e-15	2.36451e-13	1.01754	-0.363065	-2.07376	440	RIOK2, METTL18, SBDS, INTS6, SMAD3, TRMT12, ELP5, SLFN13, NARS2, TRMT61A, RSL1D1, ABT1, GTF3C5, MTO1, ICE2, WBP11, MOCS3, SNAPC5, TENT2, INTS12, THUMPD1, TDRD12, MAK16, ERI1, PELO, NSUN2, URB1, LAS1L, ZNF143, DDX10, ELAC1, EIF4A3, SHQ1, HELQ, SMAD2, BRIX1, INTS8, TSR2, INTS6L, UTP14C, RPP38, PARS2, NOL11, TARS2, CLP1, UTP4, MTERF4, RBM7, AGO3, YTHDF2, IMP3, ERI2, LCMT2, GTF3C4, DROSHA, GTF3A, SNU…
GOBP	GOBP_CELL_CHEMOTAXIS	1.20732e-15	2.46434e-13	1.01754	0.520268	2.37608	207	PPBP, CCL23, ALOX5, CX3CR1, S100A12, TRPM4, S100A9, CCR2, ADGRE2, S100A8, LGALS3, NRP1, THBS1, NOD2, FPR2, TNFAIP6, CXCL1, SPI1, DOCK4, AIF1, CCL2, CCL20, CXCL16, CD300H, LGMN, CSF3R, SERPINE1, AZU1, HGF, CCL3, CXCL3, LYN, IL10, TNFRSF11A, C5AR1, C3AR1, CCL8, FCER1G, HBEGF, PF4V1, RAB13, CCR1, PF4, VEGFA, C5AR2, CSF1R, CCL7, CMKLR1, CXCL6, ITGA9, CCRL2, IL1B, SLC8B1, NOTCH1, GAS6, DPP4, ABCC1, PR…
REACTOME	REACTOME_PROCESSING_OF_CAPPED_INTRON_CONTAINING_PRE_MRNA	1.36827e-15	2.74707e-13	1.01754	-0.465987	-2.46023	213	CSTF2T, PLRG1, SF1, SYF2, HNRNPU, HNRNPA0, RBM5, NUP107, CPSF7, WBP11, NUP160, PRPF38A, CASC3, BCAS2, NUP43, SF3B4, SRSF6, CCAR1, PPWD1, SF3B1, WDR33, SRSF2, THOC3, EIF4A3, POLDIP3, BUD31, METTL14, HNRNPD, CDC5L, FYTTD1, POLR2D, HNRNPUL1, CLP1, HNRNPK, NUDT21, TFIP11, RAE1, NUP54, SRSF5, CWC22, DHX9, SNRPB2, PRPF4, CSTF1, PPIE, CHTOP, SNU13, DDX23, PRCC, CSTF3, CD2BP2, NUP35, PAPOLA, NXF1, SNRNP4…
GOBP	GOBP_SECRETION	1.72872e-15	3.41477e-13	1.01754	0.401082	1.98281	576	ADM, ALOX5, NRG1, WLS, TRPM4, PTGES, PTAFR, ENG, NIBAN2, RAB3D, CCR2, P2RY2, GLUL, ADGRE2, HCK, AQP9, SNX10, FGR, TREM2, S100A8, ABCC4, STEAP3, HMOX1, FCGR2B, RAB31, VDR, OSM, MERTK, MCTP1, ANXA3, HK2, ITGAM, TNFRSF1A, CD300A, SPI1, RETN, ICA1, GATA2, SLC22A4, FES, PCSK6, HFE, CTBP2, SCIN, STX11, P2RX1, DAB2, TLR2, SEPTIN5, RHBDF2, FKBP1B, LIF, GPR27, TIFAB, CCL3, LYN, KCNQ1, TNFRSF11A, SDCBP, IL…
KEGG	KEGG_LYSOSOME	2.23302e-15	4.23556e-13	1.00732	0.632125	2.62694	102	SLC11A1, ATP6V0D2, CTSD, CTSB, SCARB2, PSAP, CD68, CTSC, CTSL, LGMN, LIPA, ASAH1, CTSS, FUCA1, PLA2G15, TCIRG1, NPC2, CTSA, ARSB, ATP6V0D1, GNS, SORT1, MANBA, ATP6V0A1, LAMP2, SGSH, GALNS, PPT1, NAGA, HEXB, TPP1, GAA, LAMP1, CTSZ, GLB1, AP1B1, ATP6AP1, HEXA, DNASE2, CLTB, LAPTM4B, GBA, MCOLN1, AP1S2, HGSNAT, NAGPA, GNPTAB, ARSA, IGF2R, CTSH, M6PR, CTSO, NPC1, SUMF1, GLA, ATP6V1H, DNASE2B, ACP2, A…
bioplanet	bioplanet_Lysosome	2.23302e-15	4.23556e-13	1.00732	0.632125	2.62694	102	SLC11A1, ATP6V0D2, CTSD, CTSB, SCARB2, PSAP, CD68, CTSC, CTSL, LGMN, LIPA, ASAH1, CTSS, FUCA1, PLA2G15, TCIRG1, NPC2, CTSA, ARSB, ATP6V0D1, GNS, SORT1, MANBA, ATP6V0A1, LAMP2, SGSH, GALNS, PPT1, NAGA, HEXB, TPP1, GAA, LAMP1, CTSZ, GLB1, AP1B1, ATP6AP1, HEXA, DNASE2, CLTB, LAPTM4B, GBA, MCOLN1, AP1S2, HGSNAT, NAGPA, GNPTAB, ARSA, IGF2R, CTSH, M6PR, CTSO, NPC1, SUMF1, GLA, ATP6V1H, DNASE2B, ACP2, A…
GOBP	GOBP_REGULATION_OF_MRNA_METABOLIC_PROCESS	2.24799e-15	4.23556e-13	1.00732	-0.437749	-2.33686	240	CNOT8, TENT5C, ZC3HAV1, PDE12, GTPBP1, SF1, FASTKD1, HNRNPU, HNRNPA0, CNOT6L, RBM5, ZFP36L2, CPSF7, VIRMA, CASC3, CSDE1, FASTKD5, CPSF6, SF3B4, SRSF6, TOB1, ROCK2, SRSF2, PUM1, EIF4A3, CNOT2, RBFOX2, METTL14, CNOT1, HNRNPD, TNRC6C, DAZAP1, POLR2D, HNRNPK, NUDT21, CNOT7, AXIN2, CDC73, RBM7, CARHSP1, MBNL1, CWC22, NPM1, DHX9, YTHDF2, SRPK3, PCID2, PAF1, RC3H2, EXOSC9, EIF4ENIF1, PAPOLA, NCL, TNRC6B…
GOBP	GOBP_CHROMATIN_ORGANIZATION	2.51113e-15	4.65966e-13	1.00732	-0.355345	-2.03261	443	HLTF, BRD2, TLK1, BRPF3, ZBTB1, SMARCA5, TSPYL2, NAP1L2, RIOX1, TSPYL1, GATAD1, KANSL2, KLF2, ZMYND11, PPM1D, WAC, EMSY, HNRNPU, ACTR8, KANSL1, CHD2, SIRT1, RESF1, PRKAA1, TLK2, RBL2, HJURP, EHMT2, ING3, KAT6A, RIF1, SPTY2D1, APBB1, MTA3, SMYD5, TTI1, GATA3, KDM4C, KAT7, DCAF1, PIK3CA, TASOR, NFRKB, ASIP, EZH1, KDM3A, MTA2, BRD8, UIMC1, VPS72, KDM2A, SFMBT1, AXIN1, BRD3, TSPYL4, PHF1, TADA2B, UTY…
GOBP	GOBP_REGULATION_OF_CELLULAR_COMPONENT_MOVEMENT	2.55516e-15	4.67061e-13	1.00732	0.382769	1.90969	676	NRG1, CX3CR1, CD9, TRPM4, PTAFR, ENG, CCR2, GLUL, SOD2, SELP, FGR, EMILIN2, TREM2, PLAU, HMOX1, LGALS3, SPHK1, NRP1, THBS1, NOD2, FPR2, MCTP1, ANXA3, TNFAIP6, TIMP1, PYCARD, CD300A, SPI1, DOCK4, CLDN5, GRN, AIF1, VCL, CD151, GATA2, FES, CCL2, CCL20, LRP1, CXCL16, ITGAV, CLEC7A, LGMN, DAB2, TMSB10, PLXNB2, SERPINE1, PRCP, JAG1, TEK, IL1R1, DOCK5, TRIB1, HGF, FN1, CCL3, SPRED1, LYN, GPNMB, SRC, C5A…
GOBP	GOBP_CELL_ACTIVATION	2.8116e-15	5.06377e-13	1.00732	0.37137	1.86168	764	CLU, BATF, JAG2, CX3CR1, CD9, S100A12, PTAFR, CCR2, ADGRE2, DYSF, VNN1, VWF, SELP, FGR, TNIP2, TREML1, EMILIN2, TREM2, HMOX1, LGALS3, LILRA5, SBNO2, FCGR2B, NECTIN2, SPHK1, SLC11A1, THBS1, LST1, CD93, MERTK, NOD2, FPR2, ANXA3, HLX, TIMP1, PYCARD, ITGAM, LILRB4, CD300A, SPI1, LDLR, GRN, IFNGR2, AIF1, VCL, CD151, HES1, GATA2, FES, FGL2, CCL2, HFE, CTSC, CTSL, LRP1, BCL3, CD300LF, P2RX1, CLEC7A, TLR…
GOBP	GOBP_REGULATION_OF_IMMUNE_SYSTEM_PROCESS	3.04109e-15	5.39771e-13	1.00732	0.353762	1.78618	952	CLU, TLR5, CX3CR1, CD9, TRPM4, PTAFR, FCGR1A, CCR2, AQP3, ADGRE2, HCK, VNN1, SELP, FGR, TNIP2, TREM2, FPR3, FPR1, HMOX1, LGALS3, FCGR2B, NECTIN2, SPHK1, STING1, TMEM176B, SLC11A1, THBS1, LST1, MERTK, NOD2, FPR2, TNFAIP6, HLX, PYCARD, ITGAM, CARD9, CD68, LILRB4, CD300A, SPI1, LDLR, GRN, FCN1, AIF1, MAPK11, HES1, GATA2, FES, FGL2, CCL2, IRAK3, HFE, SCIN, CCL20, CTSC, LY96, CD300LF, CLEC7A, LGMN, TL…
GOBP	GOBP_IMMUNE_EFFECTOR_PROCESS	4.37274e-15	7.65042e-13	0.996986	0.429378	2.08766	425	CLU, BATF, CX3CR1, TRPM4, PTAFR, FCGR1A, CCR2, ADGRE2, HCK, DYSF, FGR, TREM2, HMOX1, LGALS3, SBNO2, FCGR2B, NECTIN2, SLC11A1, NOD2, ANXA3, HLX, PYCARD, ITGAM, CARD9, LILRB4, CD300A, SPI1, GRN, FCN1, GATA2, FES, FGL2, IRAK3, HFE, CTSC, LRP1, BCL3, CLEC7A, VSIG4, NOTCH2, IL18, JAG1, IL1R1, AZU1, CCL3, LYN, CD180, IL10, SRC, TYROBP, FCER1G, TCIRG1, TNFRSF1B, CSF2RB, TLR8, TLR4, CD36, SCIMP, CFP, C1Q…
bioplanet	bioplanet_Phagosome	5.15996e-15	8.82799e-13	0.996986	0.637381	2.6335	95	MARCO, FCGR1A, ITGB5, FCGR2B, NCF2, MSR1, THBS1, ATP6V0D2, ITGAM, CTSL, ITGAV, CLEC7A, TLR2, CD14, NCF4, CTSS, CYBB, ATP6V1A, TCIRG1, TLR4, TUBB1, CD36, ITGA2, ATP6V0D1, TLR6, COMP, FCAR, MRC2, NCF1, MRC1, ATP6V0A1, LAMP2, CYBA, OLR1, C3, DYNC1H1, ATP6V1D, LAMP1, TUBA8, ATP6AP1, ACTG1, ATP6V1B2, ITGB2, ATP6V0E1, RAB5B, CALR, SEC61B, TUBB6, CANX, ACTB, SEC61A1, M6PR, ATP6V1H, MPO, ITGB1, RAB7B, IT…
GOBP	GOBP_CELLULAR_RESPONSE_TO_BIOTIC_STIMULUS	5.18997e-15	8.82799e-13	0.996986	0.540095	2.42901	180	PPBP, CX3CR1, PTAFR, HCK, TNIP2, TREM2, SBNO2, FCGR2B, ATG10, NOD2, PYCARD, CD68, CXCL1, SPI1, CCL2, LY96, CLEC7A, TLR2, CASP1, NOTCH2, IL18, SERPINE1, CD14, TSPO, TRIB1, CCL3, CXCL3, LYN, CD180, IL10, SRC, ACOD1, PDCD1LG2, TNFRSF1B, TLR4, CD36, SCIMP, PF4V1, SASH1, PF4, LITAF, NR1H3, TLR6, IL1A, TLR1, WFS1, BMP6, TRIM5, CXCL6, CEBPB, MRC1, EPHB2, GSTP1, IL1B, NLRP3, MAP2K3, LILRA2, CDA, APAF1, N…
GOBP	GOBP_REGULATION_OF_BODY_FLUID_LEVELS	5.39373e-15	9.0489e-13	0.996986	0.488589	2.27779	249	ADM, CD9, AQP3, P2RY2, TFPI, F13A1, VWF, SELP, SERPINA1, TREML1, EMILIN2, PLAU, VDR, PLAUR, THBS1, MERTK, HK2, UGCG, PAPSS2, VCL, ENTPD1, SLC22A4, P2RX1, MPIG6B, SERPINE1, TIFAB, FN1, LYN, THBD, SRC, CLIC1, PLSCR1, FCER1G, P2RY12, ANXA5, TLR4, CD36, SOCS2, ITGA2, PF4V1, PF4, NR1H3, GNAQ, VEGFA, COMP, WFS1, HIF1A, NFE2, ALOX12, PRKACA, F3, PLEK, EPHB2, GP1BA, CYBA, P2RY1, GP9, MYL9, FERMT3, GAS6, …
GOBP	GOBP_REGULATION_OF_LEUKOCYTE_MIGRATION	6.68374e-15	1.10616e-12	0.996986	0.556752	2.45706	154	CX3CR1, CD9, PTAFR, CCR2, SELP, TREM2, HMOX1, LGALS3, THBS1, NOD2, FPR2, TNFAIP6, PYCARD, CD300A, SPI1, AIF1, CCL2, CCL20, LGMN, SERPINE1, IL1R1, CCL3, LYN, C5AR1, C3AR1, CCL8, P2RY12, ECM1, ITGA2, CCR1, VEGFA, C5AR2, PLCB1, IL1A, CSF1R, CCL7, CMKLR1, APP, SLC8B1, FUT7, MYD88, GAS6, DPP4, ICAM1, PLA2G7, ADAM8, IL6, RHOG, TNF, ADAM17, RABGEF1, MOSPD2, PTK2, SPN, ADTRP, CXCL8, MPP1, ST3GAL4, PLVAP,…
bioplanet	bioplanet_Messenger RNA processing	6.88212e-15	1.1238e-12	0.996986	-0.484898	-2.4957	174	ZNF473, PSKH1, CSTF2T, HNRNPU, HNRNPA0, RBM5, NUP107, CPSF7, NUP160, CLK4, NUP43, SF3B4, SPOP, SRSF6, CCAR1, SF3B1, SRSF2, DDX20, CLK3, HNRNPD, POLR2D, HNRNPUL1, CLP1, HNRNPK, NUDT21, RAE1, NUP54, SRSF5, DHX9, SNRPB2, PRPF4, CSTF1, DDX23, CSTF3, CD2BP2, NUP35, PTBP2, PAPOLA, NXF1, SFPQ, DHX8, SRRM1, SF3A1, SF3B3, NFX1, CELF1, RBM8A, SNRPN, HNRNPC, CDK7, SNRNP70, PRPF18, DNAJC8, POLR2C, HNRNPM, CL…
GOBP	GOBP_RNA_SPLICING_VIA_TRANSESTERIFICATION_REACTIONS	7.43991e-15	1.1989e-12	0.986546	-0.43732	-2.34575	248	PLRG1, SF1, CACTIN, SYF2, HNRNPU, RBM5, WBP11, PRPF38A, CASC3, CDK13, BCAS2, SRSF8, SF3B4, SRSF6, AAR2, PPWD1, SF3B1, SRSF2, DHX35, EIF4A3, DDX20, PAXBP1, BUD31, RBFOX2, METTL14, CDC5L, DAZAP1, RBM19, HNRNPK, TFIP11, RBM7, RBM14, SRSF5, MBNL1, CWC22, DHX9, SNRPB2, PRPF4, ESS2, PPIE, SRPK3, RBM41, PSIP1, SNU13, DDX23, SETX, CD2BP2, PTBP2, NCL, SFPQ, STRAP, DHX8, SART3, SRRM1, SF3A1, SF3B3, RNF113A…
bioplanet	bioplanet_Generic transcription pathway	7.70108e-15	1.22487e-12	0.986546	-0.415083	-2.25635	273	TGIF1, SMAD7, NR1D2, MED23, ZNF394, ZNF473, SMAD3, ZNF250, MED17, ZNF263, ZNF256, ZNF12, SMURF2, ZNF343, MAML2, ZNF616, ZNF274, NOTCH4, ZNF92, ZNF506, ZNF317, ZNF350, ZNF43, ZSCAN32, ZNF551, MAML1, SMAD2, ZNF562, NR4A2, ZNF528, NR2C1, ZNF567, MED13, ZNF3, SMAD4, ZNF331, NR4A3, NCOA6, ZNF184, ZNF235, SKI, ZFP1, ZNF615, MED4, ZNF28, ZNF549, ZNF14, ZNF337, HDAC1, NR3C1, ZNF597, ZNF496, ZNF571, ZNF30…
GOBP	GOBP_POSITIVE_REGULATION_OF_RNA_METABOLIC_PROCESS	9.43538e-15	1.48147e-12	0.986546	-0.262629	-1.64131	1231	SCAF8, RIOK2, ZBTB18, NR1D2, CNOT8, NFYA, PYHIN1, NFATC3, BICRAL, ZNF473, ZC3HAV1, JUND, SMAD3, ELF1, SMARCA5, MRTFA, BIRC2, BCLAF1, IRF1, LRP5, ETS1, PITHD1, XPC, MED17, ZNF263, KLF2, SSBP2, SP3, NRIP1, PDE12, GTPBP1, TAF1, ABT1, WAC, CREBRF, ROR2, HNRNPU, ACTR8, LBH, S1PR1, PBXIP1, CGA, IKBKB, ICE2, CNOT6L, ZNF24, ZFP36L2, SIRT1, JADE1, SENP2, ZFP62, CSDE1, PRKAA1, RGCC, BCL10, CDK13, MAML2, IN…
GOBP	GOBP_ENDOCYTOSIS	9.78908e-15	1.51756e-12	0.986546	0.429286	2.08051	412	CLU, MARCO, ADM, CD9, FCGR1A, SNX10, TREM2, STAB1, LDLRAD3, HHIPL1, LGALS3, FCGR2B, RAB31, CD163L1, SPHK1, MSR1, RIN1, THBS1, FPR2, MCTP1, SCARB2, CD163, PYCARD, ITGAM, LILRB4, CD300A, LDLR, FCN1, AIF1, CD151, GATA2, HFE, CTSL, LRP1, AP2A1, CXCL16, ITGAV, CLEC7A, DAB2, RHOU, SERPINE1, CD14, FLOT1, SRC, SDCBP, PTPN1, FCER1G, ITSN1, CD36, DNM1, ITGA2, TPCN2, PTX3, NR1H3, VEGFA, CLCN5, SORT1, CD5L, …
GOBP	GOBP_CYTOKINE_MEDIATED_SIGNALING_PATHWAY	1.14448e-14	1.75206e-12	0.986546	0.458312	2.17403	310	PPBP, CCL23, CX3CR1, CCR2, HCK, TNIP2, TREM2, LILRA5, SPHK1, STING1, OSM, UGCG, CASP4, PYCARD, TNFRSF1A, LILRB4, CXCL1, SPI1, LILRA6, IFNGR2, IL1RAP, CCL2, IRAK3, CCL20, CD300LF, LILRA1, PLP2, NOL3, NAIP, CASP1, CSF3R, IL18, IL1R1, CCL3, CXCL3, ACSL1, SRC, TNFRSF11A, IL1RN, PTPN1, CCL8, FCER1G, TNFRSF1B, CSF2RB, TNFSF13B, ECM1, PF4V1, CCR1, PF4, NR1H3, CEBPA, PLCB1, IL1A, TREX1, CSF1R, GPR35, CCL…
GOBP	GOBP_RNA_SPLICING	1.27925e-14	1.92951e-12	0.986546	-0.384777	-2.13239	341	AKAP17A, PLRG1, SF1, CACTIN, SYF2, HNRNPU, RBM5, WBP11, VIRMA, RBM38, PRPF38A, CASC3, CDK13, BCAS2, CLK4, SRSF8, SF3B4, SRSF6, AAR2, SLC38A2, PPWD1, SF3B1, SRSF2, DHX35, THOC3, EIF4A3, DDX20, PAXBP1, BUD31, RBFOX2, CLK3, METTL14, CDC5L, DAZAP1, RBM19, CLP1, HNRNPK, TFIP11, RBM7, RBM14, SRSF5, MBNL1, CWC22, DHX9, SNRPB2, PRPF4, ESS2, CCAR2, PPIE, SRPK3, RBM41, PSIP1, SNU13, ZNF830, DDX23, SETX, CD…
REACTOME	REACTOME_PLATELET_ACTIVATION_SIGNALING_AND_AGGREGATION	1.29191e-14	1.92951e-12	0.986546	0.525999	2.37372	189	CLU, PPBP, CD9, F13A1, VWF, SELP, SERPINA1, ABCC4, LHFPL2, THBS1, PSAP, TIMP1, DAGLB, GNB4, VCL, MPIG6B, SERPINE1, HGF, FN1, LYN, DAGLA, SRC, PTPN1, ITGA2B, FCER1G, P2RY12, ANXA5, ECM1, CD36, PF4, TOR4A, GNAQ, VEGFA, APLP2, CFD, ARRB1, PLEK, SPARC, CLEC1B, APP, LAMP2, GNG11, QSOX1, GP1BA, P2RY1, GNA15, CFL1, GP9, FERMT3, LGALS3BP, GAS6, PRKCD, RHOB, MGLL, CYB5R1, TLN1, SYK, CD109, GNB1, RHOG, CAP…
GOBP	GOBP_WOUND_HEALING	1.9522e-14	2.88056e-12	0.975995	0.466767	2.20284	293	ALOX5, NRG1, CD9, TFPI, F13A1, DYSF, VWF, SELP, SERPINA1, TREML1, EMILIN2, S100A8, PLAU, HMOX1, PLAUR, SLC11A1, THBS1, MERTK, PAPSS2, TIMP1, VCL, CD151, ENTPD1, GATA2, P2RX1, CLEC7A, MPIG6B, NOTCH2, SERPINE1, PRCP, FN1, MYOF, LYN, THBD, SRC, CLIC1, PLSCR1, FCER1G, HBEGF, P2RY12, ANXA5, TLR4, CD36, ITGA2, PF4V1, PF4, GNAQ, VEGFA, COMP, MYLK, IL1A, HIF1A, ALOX12, F3, PLEK, EPHB2, GP1BA, P2RY1, GP9,…
REACTOME	REACTOME_TRANSPORT_OF_SMALL_MOLECULES	2.08757e-14	3.04363e-12	0.975995	0.411991	2.01616	459	ABCG4, TRPM6, EMB, TRPM4, AQP3, AQP9, SLC50A1, SLC47A1, ABCC4, STEAP3, HMOX1, LCN2, STOM, SLC31A1, SLC11A1, SLC46A1, ATP6V0D2, SLC1A3, SLC7A7, CYBRD1, SLC39A4, LDLR, GNB4, SLC22A4, PCSK6, HFE, AP2A1, SLC22A15, PRKAR2B, LIPA, FKBP1B, RHAG, SOAT1, SLC39A1, ATP6V1A, LPL, TCIRG1, ABCC3, NPC2, SLC43A2, SLCO2B1, TPCN2, SLC16A3, SLC2A6, ATP6V0D1, NR1H3, TTYH3, CLCN5, ATP2A2, SLC6A6, SLCO4A1, SLC6A9, SLC…
GOBP	GOBP_POSITIVE_REGULATION_OF_MAPK_CASCADE	2.15287e-14	3.1019e-12	0.975995	0.458078	2.17489	303	CCL23, MARCO, NRG1, S100A12, TNFAIP8L3, TREM2, LILRA5, FCGR2B, SPHK1, NRP1, THBS1, OSM, NOD2, FPR2, PYCARD, CARD9, SPI1, GSDME, CCL2, IGFBP4, CCL20, CAVIN3, CLEC7A, NAIP, NOTCH2, LIF, LTBR, TEK, HGF, CCL3, GPNMB, SRC, TNFRSF11A, C5AR1, SDCBP, PTPN1, CCL8, NPTN, SPAG9, TLR4, CD36, SCIMP, SASH1, CCR1, VEGFA, TLR6, MAP3K11, C5AR2, PLCB1, IL1A, CSF1R, STK3, CCL7, TRIM5, LAMTOR2, ARRB1, NCF1, IQGAP1, …
GOBP	GOBP_DNA_REPAIR	2.35104e-14	3.34805e-12	0.975995	-0.35098	-2.00518	454	ZBTB1, XPC, DNTT, TDP2, EMSY, ACTR8, PPP4R3B, PARG, USP47, GADD45A, SIRT1, WDR48, TDP1, RPA2, TERF2, RAD18, ING3, RIF1, MRE11, RAD21, WDR33, KAT7, POT1, WRNIP1, HELQ, BLM, EME1, RFC5, NFRKB, XRCC6, ETAA1, PMS1, CDC7, CRY2, UVRAG, SLC30A9, FANCM, BRD8, UIMC1, VPS72, KDM2A, CDC5L, FAN1, ERCC4, PCNA, TFIP11, AXIN2, ALKBH3, SWSAP1, RNF138, EPC1, NPM1, SHLD3, SMARCAL1, DHX9, MUTYH, ASF1A, APLF, AP5Z1,…
GOBP	GOBP_PROTEIN_MODIFICATION_BY_SMALL_PROTEIN_CONJUGATION_OR_REMOVAL	3.12097e-14	4.39339e-12	0.965328	-0.292913	-1.76581	820	SMAD7, HLTF, OBI1, SUPT20H, MEX3C, ASB1, BAG5, FBXL14, VPS18, USP13, TNFAIP3, TPP2, BIRC2, MYLIP, KLHL7, MARCHF3, SIAH2, MARCHF5, LNX2, HERC4, RNF103, HECTD1, CDC23, TAF1, WAC, SKP2, SOCS5, JADE2, USP47, GID4, G2E3, FBXL3, SMURF2, DCAF5, RNF139, COPS2, MINDY2, SIRT1, MOCS3, RNF26, SENP2, FBXL5, WDR48, USP20, FBXO33, BCL10, UHRF2, FBXW8, KLHL3, RMND5A, PJA1, HERC3, RNF122, SENP7, UBE2J1, ITCH, SPO…
GOBP	GOBP_RIBONUCLEOPROTEIN_COMPLEX_BIOGENESIS	5.72632e-14	7.96935e-12	0.954542	-0.372718	-2.08795	373	RIOK2, METTL18, SBDS, NIP7, RSL1D1, ABT1, SF1, SURF6, RBM5, CPSF7, WBP11, CPSF6, RAMAC, MAK16, ERI1, SRSF6, AAR2, URB1, LAS1L, TSC1, DDX10, SF3B1, EIF4A3, DHX30, DDX28, SHQ1, HELQ, BRIX1, DDX20, NGRN, TSR2, UTP14C, RPP38, ABCE1, NOL11, POLR2D, CLP1, NUDT21, UTP4, MTERF4, URB2, CDC73, ISG20L2, AGO3, SRSF5, NPM1, DHX9, YTHDF2, IMP3, ERI2, SRPK3, DROSHA, GTF3A, PSIP1, SNU13, DDX23, DDX3X, EXOSC9, SE…
WP	WP_OVERVIEW_OF_PROINFLAMMATORY_AND_PROFIBROTIC_MEDIATORS	6.1425e-14	8.45249e-12	0.954542	0.733825	2.70196	52	PPBP, CCL23, OSM, MMP1, CXCL1, CCL2, CCL20, CXCL16, IL18, LIF, CCL3, CXCL3, IL10, MMP9, IL1RN, CCL8, TNFSF13B, PF4V1, PF4, VEGFA, IL1A, CCL7, CXCL6, IL1B, CXCL14, IL6, SPP1, IL22, TNF
GOBP	GOBP_INNATE_IMMUNE_RESPONSE	7.38625e-14	1.0051e-11	0.954542	0.403062	1.97939	510	CLU, CCL23, TLR5, MARCO, CX3CR1, S100A12, S100A9, FCGR1A, HCK, VNN1, FGR, TREML1, RAB20, TREM2, S100A8, MEFV, MSRB1, LCN2, LGALS3, LILRA5, FCGR2B, NCF2, NECTIN2, STING1, SLC11A1, NOD2, FPR2, DAPK1, CASP4, PYCARD, ITGAM, CARD9, SPI1, GRN, CDC42EP2, FCN1, AIF1, ZYX, FES, IL1RAP, CCL2, IRAK3, CCL20, STMP1, CXCL16, CLEC7A, NAIP, TLR2, VSIG4, CASP1, IL18, CD14, RNASE6, COCH, CCL3, CYBB, LYN, CD180, SR…
bioplanet	bioplanet_Leptin influence on immune response	7.67807e-14	1.03333e-11	0.954542	0.647921	2.57762	79	PPBP, BATF, CX3CR1, PTAFR, CCR2, SELP, TNFRSF8, FPR1, ALOX5AP, FCGR2B, NCF2, ALCAM, TIMP1, ITGAM, TNFSF12, CXCL1, IL1RAP, CCL2, CXCL16, CSF3R, LIF, NCF4, CTSS, MMP9, IL1RN, LYZ, FCER1G, TLR8, CD36, CCR1, PF4, VEGFA, CCRL2, IL1B, MMP2, IL6, ITGAX, TNF
HALLMARK	HALLMARK_COMPLEMENT	8.98017e-14	1.19544e-11	0.954542	0.541049	2.39728	156	CLU, GCA, S100A12, S100A9, SERPINA1, MSRB1, LGALS3, PLAUR, CTSD, CTSB, CASP4, TIMP1, ITGAM, CXCL1, DOCK4, GNB4, FCN1, CTSC, CTSL, LRP1, LGMN, DUSP6, CASP1, LIPA, SERPINE1, PRCP, CTSS, FN1, LYN, SRC, PLSCR1, FCER1G, CPM, ANXA5, CD36, ANG, LTA4H, C1QC, KYNU, CEBPB, F3, PLEK, LAMP2, GP1BA, CDA, GP9, OLR1, DPP4, ADAM9, PRKCD, C3, PPP2CB, CPQ, PLA2G7, CALM3, CFH, PPP4C, IL6, TFPI2, RHOG, PSEN1, ATOX1,…
GOBP	GOBP_MYELOID_CELL_ACTIVATION_INVOLVED_IN_IMMUNE_RESPONSE	9.74272e-14	1.283e-11	0.954542	0.659177	2.60377	76	CX3CR1, PTAFR, CCR2, ADGRE2, DYSF, FGR, TREM2, HMOX1, SBNO2, ANXA3, PYCARD, ITGAM, CD300A, SPI1, GRN, GATA2, FES, CCL3, LYN, TYROBP, FCER1G, PRAM1, TREX1, ADORA2B, GAB2, LILRA2, MYD88, FER1L5, TICAM1, PTGDS, SYK, IFI35, RABGEF1, STXBP2, ITGB2, CD177, PTPN6, LAT2, BTK, SUCNR1
GOBP	GOBP_ION_TRANSMEMBRANE_TRANSPORT	1.22518e-13	1.59626e-11	0.943632	0.380277	1.88786	614	TRPM6, EMB, TRPM4, PTAFR, CCR2, SLC47A1, TREM2, ABCC4, STOM, SLC31A1, SLC31A2, SLC11A1, SLC46A1, TMEM37, ATP6V0D2, SLC1A3, DAPK1, KCNK13, SLC39A4, IFNGR2, SLC37A2, SLC22A4, CCL2, KCNMB1, HFE, ITGAV, PLP2, P2RX1, NOL3, TMEM150C, FKBP1B, RHAG, CTSS, CCL3, CYBB, LYN, KCNQ1, G6PD, SLC39A1, ATP6V1A, MMP9, CLIC1, TCIRG1, SLC25A37, SLC43A2, GEM, TPCN2, SLC16A3, ATP6V0D1, COX6B1, VMP1, TTYH3, CLCN5, STAC…
bioplanet	bioplanet_Oncostatin M	1.67725e-13	2.16224e-11	0.943632	0.517775	2.32699	178	S100A12, S100A9, SOD2, SELP, S100A8, PLAU, HMOX1, LCN2, PLAUR, SERPINB1, CTSB, ANXA3, HK2, RNASE4, CASP4, TIMP1, MMP1, CXCL1, LDLR, CCL2, CCL20, S100P, STX11, ITGAV, SERPINE1, IL1R1, HGF, FN1, CXCL3, LYN, LPL, CCL8, ECM1, CEBPD, SLCO2B1, SLC16A3, VEGFA, AKR1C1, CCL7, HIF1A, LDHA, MT2A, CXCL6, F3, IL13RA1, IER3, ETS2, CDA, CISH, CDKN1A, VIM, ICAM1, MGLL, CAMP, PGK1, MMP2, IL6, ATF3, MT1E, KLF10, F…
REACTOME	REACTOME_RESPONSE_TO_ELEVATED_PLATELET_CYTOSOLIC_CA2	1.82841e-13	2.33256e-11	0.943632	0.633411	2.56433	86	CLU, PPBP, CD9, F13A1, VWF, SELP, SERPINA1, ABCC4, LHFPL2, THBS1, PSAP, TIMP1, VCL, SERPINE1, HGF, FN1, ITGA2B, ANXA5, ECM1, CD36, PF4, TOR4A, VEGFA, APLP2, CFD, PLEK, SPARC, APP, LAMP2, QSOX1, CFL1, FERMT3, LGALS3BP, GAS6, CYB5R1, TLN1, CD109, CAP1, PROS1, RAB27B, ENDOD1, STXBP2, PPIA, CALU, SERPING1
GOBP	GOBP_REGULATION_OF_DEFENSE_RESPONSE	3.08407e-13	3.89388e-11	0.932595	0.409206	1.99352	439	ALOX5, S100A12, S100A9, PTGES, CCR2, HCK, FGR, EMILIN2, TREM2, S100A8, MEFV, LILRA5, ALOX5AP, SBNO2, FCGR2B, NECTIN2, SPHK1, STING1, OSM, NOD2, HTRA1, FPR2, TNFAIP6, CASP4, PYCARD, CARD9, TNFRSF1A, SPI1, DAGLB, LDLR, GRN, FCN1, ZYX, FGL2, IRAK3, CTSC, CLEC7A, TLR2, METRNL, VSIG4, CASP1, RHBDF2, IL18, SERPINE1, TEK, IL1R1, COCH, HGF, AOAH, CCL3, LYN, IL10, DAGLA, SRC, TNFRSF11A, ACOD1, LPL, MMP9, …
GOBP	GOBP_ERK1_AND_ERK2_CASCADE	3.67831e-13	4.57119e-11	0.932595	0.507792	2.29758	192	CCL23, MARCO, NRG1, TNFAIP8L3, TREM2, GRB10, NRP1, NOD2, FPR2, PYCARD, CARD9, CCL2, CCL20, CAVIN3, ITGAV, DUSP6, DAB2, NOTCH2, LIF, TEK, FN1, CCL3, SPRED1, LYN, GPNMB, SRC, TNFRSF11A, C5AR1, PTPN1, CCL8, SPRY1, NPTN, TLR4, CD36, SCIMP, CCR1, C5AR2, IL1A, CSF1R, CCL7, ARRB1, APP, EPHB2, GSTP1, IL1B, P2RY1, FFAR4, NLRP12, NOTCH1, GAS6, PTPN2, ICAM1, PDE8A, RRAS, MTURN, SYK, CIB1, GLIPR2, SPRY2, ITG…
GOBP	GOBP_NEGATIVE_REGULATION_OF_TRANSCRIPTION_BY_RNA_POLYMERASE_II	3.69517e-13	4.57119e-11	0.932595	-0.30834	-1.81641	623	TGIF1, SMAD7, SCAF8, ZBTB18, NR1D2, SUFU, JUND, ZBTB1, ID3, SMAD3, IKZF5, TXNIP, MXI1, GFI1, ZHX1, ZNF263, KLF2, SP3, NRIP1, PHF12, TAF1, HNRNPU, GADD45A, SIN3B, SMURF2, ZNF343, FST, COPS2, SIRT1, ZBTB4, PER3, ZBTB14, SCAF4, ZBTB33, ZEB1, ZNF274, NOTCH4, EHMT2, CBFA2T2, MAGEH1, RIF1, YWHAZ, APBB1, MTA3, ZNF684, ZNF350, HEXIM1, GATA3, ATF4, ZBTB25, DCAF1, SEMA4D, NFATC2, TRIB3, ZHX2, THAP1, THAP11…
GOBP	GOBP_HEMOSTASIS	4.5865e-13	5.61709e-11	0.921426	0.526656	2.34903	168	CD9, TFPI, F13A1, VWF, SELP, SERPINA1, TREML1, EMILIN2, PLAU, PLAUR, THBS1, MERTK, PAPSS2, VCL, ENTPD1, P2RX1, MPIG6B, SERPINE1, FN1, LYN, THBD, SRC, CLIC1, PLSCR1, FCER1G, P2RY12, ANXA5, TLR4, CD36, ITGA2, PF4V1, PF4, GNAQ, COMP, NFE2, ALOX12, F3, PLEK, EPHB2, GP1BA, P2RY1, GP9, MYL9, FERMT3, GAS6, PRKCD, TLN1, RAB27A, SYK, JMJD1C, IL6, ACTG1, NFE2L2, TFPI2, PROS1, BLOC1S6, SERPINE2, PPIA, ADTRP…
GOBP	GOBP_NCRNA_PROCESSING	5.5635e-13	6.74615e-11	0.921426	-0.37101	-2.05541	332	RIOK2, METTL18, SBDS, INTS6, SMAD3, TRMT12, ELP5, TRMT61A, RSL1D1, ABT1, MTO1, WBP11, MOCS3, INTS12, THUMPD1, MAK16, ERI1, NSUN2, URB1, LAS1L, DDX10, ELAC1, EIF4A3, SHQ1, HELQ, SMAD2, BRIX1, INTS8, TSR2, INTS6L, UTP14C, RPP38, NOL11, CLP1, UTP4, MTERF4, AGO3, YTHDF2, IMP3, ERI2, LCMT2, DROSHA, SNU13, DDX3X, NSUN6, EXOSC9, METTL8, EXOSC4, AGO1, DTWD2, UTP18, RNF113A, ZNHIT3, TP53RK, NGDN, RRP8, RP…
GOBP	GOBP_DNA_METABOLIC_PROCESS	5.99834e-13	7.20212e-11	0.921426	-0.29447	-1.75731	729	ZBTB1, XPC, DNTT, TDP2, PPM1D, EMSY, HNRNPU, ACTR8, JADE2, PPP4R3B, PARG, USP47, CHTF18, GADD45A, KPNA1, THAP9, IL7R, SIRT1, JADE1, WDR48, RGCC, UHRF2, TDP1, TDRD12, ORC4, RPA2, TCF7, TERF2, RAD18, EHMT2, ING3, RIF1, MRE11, RAD21, GATA3, WDR33, KAT7, DCAF1, POT1, WRNIP1, PIK3CA, HELQ, CNBP, BLM, TOP2B, EME1, RFC5, SMG5, NFRKB, XRCC6, ETAA1, PMS1, CDC7, CRY2, UVRAG, SLC30A9, FANCM, TFRC, MTA2, BRD…
GOBP	GOBP_POSITIVE_REGULATION_OF_SIGNALING	6.46808e-13	7.69074e-11	0.921426	0.325092	1.64593	1121	CCL23, TLR5, MARCO, JAG2, NRG1, WLS, CX3CR1, S100A12, TRPM4, S100A9, ENG, CCR2, GLUL, VWF, SELP, CYFIP1, FGR, TNFAIP8L3, TNIP2, RASGRP4, TREM2, S100A8, HMOX1, LILRA5, GRB10, FCGR2B, NECTIN2, SPHK1, STING1, NRP1, VDR, PLAUR, MAOA, THBS1, OSM, SLC1A3, BVES, NOD2, FPR2, CASP4, S100A4, PYCARD, CARD9, TNFRSF1A, CD300A, TNFSF12, SPI1, GSDME, RETN, HES1, BAIAP2, CCL2, HFE, IGFBP4, CTBP2, CCL20, CTSC, LY…
REACTOME	REACTOME_EXTRACELLULAR_MATRIX_ORGANIZATION	7.16861e-13	8.44173e-11	0.921426	0.533756	2.35557	154	VWF, ITGB5, EMILIN2, THBS1, CTSD, HTRA1, CTSB, COL9A2, TIMP1, MMP1, ITGAM, MMP19, CD151, CTSL, ITGAV, PLOD1, LAMC1, SERPINE1, CTSS, FN1, VCAN, SDC3, MMP9, ITGA2B, ITGA2, COMP, MMP25, ITGA9, LOXL3, SPARC, APP, LTBP1, CAPN3, PLOD3, ICAM3, ADAM15, FURIN, ICAM1, ADAM9, CAPN1, PLEC, ADAM8, ADAM19, LAMB2, MMP2, SDC2, SPP1, NCSTN, ITGAX, ADAM17, DDR1, PSEN1, ITGB2, COL10A1, COLGALT1, NCAM1, LAMB3, CD44,…
GOBP	GOBP_POSITIVE_REGULATION_OF_RESPONSE_TO_EXTERNAL_STIMULUS	7.60325e-13	8.86829e-11	0.921426	0.444886	2.11102	305	CX3CR1, S100A12, S100A9, CCR2, HCK, EMILIN2, TREM2, S100A8, LILRA5, ALOX5AP, NECTIN2, STING1, NRP1, THBS1, OSM, NOD2, FPR2, PYCARD, CARD9, TNFRSF1A, SPI1, LDLR, GRN, FCN1, AIF1, CTSC, LY96, CLEC7A, LGMN, TLR2, CASP1, IL18, FKBP1B, SERPINE1, AZU1, COCH, CCL3, LYN, CD180, THBD, SRC, TNFRSF11A, C5AR1, ACOD1, LPL, C3AR1, PLSCR1, MGST2, TYROBP, P2RY12, TLR8, TLR4, NLRC4, ITGA2, SCIMP, SASH1, CCR1, CEB…
WP	WP_TYROBP_CAUSAL_NETWORK_IN_MICROGLIA	8.09559e-13	9.35346e-11	0.921426	0.691394	2.62588	58	ABCC4, LHFPL2, DPYD, NCF2, SLC7A7, HLX, PYCARD, ITGAM, IGSF6, CXCL16, IL18, RNASE6, TYROBP, TCIRG1, TNFRSF1B, NPC2, CAPG, RBM47, C1QC, ADAP2, LOXL3, IL13RA1, PLEK, TMEM106A, PPP1R18, C3, TGFBR1, HCLS1, GPX1, SPP1, ITGAX, ITGB2, FKBP15, SLC1A5, KCNE3, NCKAP1L, ELF4, CD4, LYL1, CREB3L2, RUNX3
GOBP	GOBP_MAPK_CASCADE	9.11117e-13	1.04285e-10	0.91012	0.388763	1.91093	514	CCL23, MARCO, NRG1, S100A12, TNFAIP8L3, TREM2, LILRA5, GRB10, FCGR2B, SPHK1, NRP1, THBS1, OSM, NOD2, FPR2, PYCARD, CARD9, LILRB4, CD300A, SPI1, GSDME, MAPK11, CCL2, IRAK3, IGFBP4, CCL20, CAVIN3, ITGAV, CLEC7A, DUSP6, NAIP, DAB2, NOTCH2, IL18, LIF, LTBR, TEK, TRIB1, HGF, FN1, CAMKK2, CCL3, SPRED1, MAP3K20, LYN, GPNMB, SRC, TNFRSF11A, C5AR1, SDCBP, PTPN1, CCL8, SPRY1, NPTN, SPAG9, TLR4, CD36, SCIMP…
GOBP	GOBP_CIRCULATORY_SYSTEM_PROCESS	1.16056e-12	1.31605e-10	0.91012	0.438321	2.08026	314	ADM, TRPM4, PTAFR, P2RY2, SOD2, HTR7, TBXAS1, ABCC4, HMOX1, GUCY1B1, SLC1A3, BVES, DOCK4, CLDN5, KCNMB1, LRP1, AGTRAP, ANPEP, P2RX1, GUCY1A1, FKBP1B, PRCP, TEK, DOCK5, AZU1, MYOF, KCNQ1, SRC, RENBP, C3AR1, ABCC3, HBEGF, CD36, SLCO2B1, SLC2A5, VEGFA, COMP, ATP2A2, TREX1, SLC6A6, ADORA2B, SLC6A9, DES, BMP6, YWHAE, YES1, SLC24A3, MDM2, SGK1, PRKACA, SLC8A1, KCNK6, SLC7A8, CYBA, MAP2K3, P2RY1, PLOD3,…
bioplanet	bioplanet_Cytokine-cytokine receptor interaction	1.53693e-12	1.72686e-10	0.91012	0.538157	2.36598	148	PPBP, CCL23, CX3CR1, CCR2, TNFRSF8, OSM, TNFRSF1A, TNFSF12, CXCL1, IFNGR2, IL1RAP, CCL2, CCL20, CXCL16, CSF3R, IL18, LIF, LTBR, IL1R1, HGF, CCL3, CXCL3, IL10, TNFRSF11A, CCL8, TNFRSF1B, CSF2RB, TNFSF13B, PF4V1, CCR1, TNFRSF21, PF4, VEGFA, IL1A, CSF1R, PLEKHO2, CCL7, CXCL6, CCL4L1, IL13RA1, IFNGR1, IL1B, IFNAR2, IL15RA, TNFRSF10A, RELT, TGFBR1, CXCL14, IL1R2, CXCR1, IL6, IL22, TNF
GOBP	GOBP_REGULATION_OF_PEPTIDASE_ACTIVITY	1.67866e-12	1.86896e-10	0.91012	0.453676	2.13102	273	S100A9, TFPI, CSTA, SERPINA1, S100A8, MEFV, PLAUR, THBS1, SERPINB1, CTSD, CTSB, SPINT1, DAPK1, CASP4, TIMP1, PYCARD, CARD9, GRN, PZP, LRP1, P2RX1, CLEC7A, LGMN, NOL3, NAIP, CASP1, SERPINE1, HGF, FN1, LYN, SRC, RENBP, MMP9, ECM1, NLRC4, VSIR, VEGFA, APLP2, KLF4, SERPINB10, F3, ANXA2, APP, CST3, NLRP3, HIP1, ACER2, GAPDH, APAF1, PRDX5, NLRP12, FURIN, PRELID1, GAS6, PRDX3, C3, GSN, SERPINB8, CSTB, P…
GOBP	GOBP_HISTONE_MODIFICATION	1.83231e-12	2.02165e-10	0.898671	-0.345639	-1.96827	413	ZNF541, NFYA, SUPT20H, BRPF3, SMARCA5, NAP1L2, RIOX1, GFI1, KANSL2, TAF1, WAC, KANSL1, JADE2, PPP4R3B, PARG, PBXIP1, SIN3B, SIRT1, JADE1, PRKAA1, KAT14, ZNF274, EHMT2, ING3, KAT6A, RIF1, APBB1, MTA3, SMYD5, TADA1, GATA3, KDM4C, KAT7, DCAF1, MAP3K7, RCOR3, NELFA, SMAD4, PER1, EZH1, PAXBP1, KDM3A, MTA2, BRD8, UIMC1, VPS72, KDM2A, PRDM4, SETD4, SKI, PHC1, PHF1, TADA2B, UTY, CDC73, RBM14, EPC1, VRK2,…
HALLMARK	HALLMARK_EPITHELIAL_MESENCHYMAL_TRANSITION	1.933e-12	2.1137e-10	0.898671	0.570516	2.41752	115	ITGB5, PLAUR, THBS1, HTRA1, TIMP1, MMP1, CXCL1, IGFBP4, LRP1, ITGAV, PLOD1, ANPEP, DAB2, LAMC1, NOTCH2, SERPINE1, FN1, VCAN, FUCA1, ECM1, CAPG, ITGA2, GEM, PTX3, VEGFA, COMP, MYLK, TGFBI, TPM4, CXCL6, SPARC, QSOX1, PLOD3, SAT1, MYL9, VIM, RHOB, CADM1, MMP2, IL6, SPP1, PMP22, TFPI2, EMP3, SERPINE2, CALU, CXCL8, COLGALT1, TGM2, CD44, IGFBP2, SNTB1, P3H1, LOX, ITGB1, TAGLN, ITGA5, IL15, FGF2, EFEMP2
GOBP	GOBP_LIPID_METABOLIC_PROCESS	2.2688e-12	2.45894e-10	0.898671	0.337815	1.70228	886	CLU, ABCG4, ADM, ALOX5, PTGES, ALDH3B1, FGR, TNFAIP8L3, TBXAS1, PLBD1, TREM2, SPTSSA, ALOX5AP, SPHK1, NOD2, FPR2, PSAP, UGCG, SMPDL3A, TNFRSF1A, CYP39A1, ALDH1A1, DAGLB, LDLR, PLD1, PGAP1, SLC22A4, DHRS7, LRP1, HACD4, CYP3A5, P2RX1, LGMN, DAB2, EPHX3, IDH1, SPTLC2, PRKAR2B, LIPA, ASAH1, PGAP6, B4GALNT1, TEK, TSPO, AOAH, PCYT1A, B4GALT5, FUCA1, LYN, SOAT1, ACSL1, G6PD, DAGLA, PLA2G15, SRC, DGAT2, …
GOBP	GOBP_CYTOKINE_PRODUCTION	3.19357e-12	3.43085e-10	0.898671	0.379608	1.86919	537	CLU, TLR5, BATF, ALOX5, CX3CR1, TRPM4, PTAFR, CCR2, FGR, TNFRSF8, TREM2, MEFV, HMOX1, LILRA5, FCGR2B, SPHK1, STING1, SLC11A1, THBS1, OSM, SERPINB1, MERTK, NOD2, PYCARD, CARD9, LILRB4, FCN1, AIF1, MAPK11, IL1RAP, IRAK3, HFE, LY96, BCL3, STMP1, ITGAV, CLEC7A, TLR2, VSIG4, CASP1, IL18, SERPINE1, CD14, IL1R1, TSPO, AZU1, FLOT1, HGF, FN1, NFAM1, CCL3, CYBB, LYN, IGF2BP3, IL10, GPNMB, SRC, C5AR1, ACOD1…
WP	WP_COMPLEMENT_SYSTEM	3.34618e-12	3.56353e-10	0.898671	0.693124	2.62702	57	ADM, F13A1, SELP, FPR1, PLAUR, THBS1, CD93, FCN1, TLR2, LAMC1, VSIG4, C5AR1, C3AR1, ITGA2B, ITGA2, CFP, PTX3, C5AR2, CFD, PRKACA, GNA15, ICAM1, C3, CFH, FKBP2, SPP1, ITGAX, PROS1, SELPLG, ITGB2, SERPING1, FCN2, CALR
GOBP	GOBP_MONONUCLEAR_CELL_MIGRATION	3.51065e-12	3.70646e-10	0.898671	0.540993	2.34343	136	CCL23, ALOX5, CX3CR1, S100A12, TRPM4, CCR2, LGALS3, THBS1, FPR2, PYCARD, SPI1, AIF1, CCL2, CCL20, CXCL16, LGMN, SERPINE1, CCL3, LYN, TNFRSF11A, C5AR1, C3AR1, CCL8, ECM1, CCR1, PLCB1, CSF1R, CCL7, CMKLR1, APP, SLC8B1, FUT7, NLRP12, GAS6, ICAM1, PLEC, PLA2G7, ADAM8, TRPM2, FOLR2, CXCR1, IL6, TNF, ADAM17, HSD3B7, GBA, MOSPD2, PTK2, SPN, EPS8, ADTRP, CCR5, MYO1G, CREB3, ANO6, MAPK3, CALR, JAML, AKT1,…
GOBP	GOBP_NEGATIVE_REGULATION_OF_MULTICELLULAR_ORGANISMAL_PROCESS	3.65026e-12	3.82092e-10	0.887075	0.366967	1.82051	615	ADM, ALOX5, CX3CR1, CD9, TRPM4, NIBAN2, CCR2, TFPI, TREM2, STAB1, MEFV, PLAU, HMOX1, LILRA5, FCGR2B, NRP1, TMEM176B, SLC11A1, THBS1, SERPINB1, MERTK, NOD2, TNFAIP6, HLX, TIMP1, PYCARD, TNFRSF1A, LILRB4, SPI1, DOCK4, ALDH1A1, LDLR, CLDN5, GRN, MAPK11, HES1, GATA2, FGL2, IRAK3, HFE, CTSC, BCL3, LGMN, NOL3, TLR2, VSIG4, GUCY1A1, FKBP1B, SERPINE1, TIFAB, TEK, DOCK5, TSPO, TRIB1, HGF, FN1, CCL3, SPRED…
bioplanet	bioplanet_Platelet activation, signaling and aggregation	4.02434e-12	4.17678e-10	0.887075	0.527841	2.3333	153	CLU, PPBP, CD9, F13A1, VWF, SELP, SERPINA1, ABCC4, THBS1, PSAP, TIMP1, DAGLB, GNB4, VCL, SERPINE1, HGF, FN1, LYN, DAGLA, SRC, PTPN1, ITGA2B, FCER1G, P2RY12, CD36, PF4, GNAQ, VEGFA, CFD, ARRB1, PLEK, SPARC, APP, LAMP2, GNG11, GP1BA, P2RY1, GNA15, CFL1, GP9, GAS6, PRKCD, RHOB, MGLL, TLN1, SYK, GNB1, RHOG, CAP1, GNG5, PROS1, GNA11, PTK2, PPIA, CALU, SERPING1, PLA2G4A, GNB2, WDR1, F2RL2, VAV3, MAPK3,…
GOBP	GOBP_HUMORAL_IMMUNE_RESPONSE	4.06277e-12	4.18124e-10	0.887075	0.58154	2.42092	107	CLU, PPBP, ALOX5, S100A12, S100A9, CCR2, TREM2, FCGR2B, SLC11A1, NOD2, CXCL1, FCN1, CCL2, BCL3, VSIG4, NOTCH2, RNASE6, AZU1, CXCL3, ACOD1, LYZ, PF4V1, CFP, TNFRSF21, PF4, ANG, C1QB, C1QC, CFD, CD5L, CXCL6, IL1B, GAPDH, NOTCH1, C3, CAMP, CXCL14, CFH, IL6, TNF, TREM1, TFEB, SERPING1, CXCL8, PTPN6, TFE3, FCN2
GOBP	GOBP_CELLULAR_RESPONSE_TO_DNA_DAMAGE_STIMULUS	4.77415e-12	4.87242e-10	0.887075	-0.286978	-1.6946	696	CDKN2AIP, PYHIN1, TLK1, DYRK2, ZBTB1, BCLAF1, XPC, DNTT, MAP2K6, TDP2, TAF1, PPM1D, WAC, EMSY, SYF2, ACTR8, PPP4R3B, PARG, USP47, GADD45A, PPP4R3A, SIRT1, ZBTB4, WDR48, DYRK3, TDP1, TLK2, PLK2, RPA2, TERF2, RAD18, TOPORS, ING3, RIF1, APBB1, MRE11, RAD21, WDR33, KAT7, NFATC2, POT1, CDKN1B, WRNIP1, NEDD4, HELQ, BLM, EME1, RFC5, CTLA4, NFRKB, XRCC6, ETAA1, PMS1, CDC7, CRY2, UVRAG, SLC30A9, FANCM, BR…
GOBP	GOBP_GRANULOCYTE_MIGRATION	4.97665e-12	5.03711e-10	0.887075	0.585638	2.44075	106	PPBP, CCL23, S100A12, S100A9, ADGRE2, S100A8, LGALS3, THBS1, NOD2, TNFAIP6, CD300A, CXCL1, CCL2, CCL20, CD300H, CSF3R, IL1R1, CCL3, CXCL3, C5AR1, C3AR1, CCL8, FCER1G, PF4V1, PF4, C5AR2, IL1A, CSF1R, CCL7, CMKLR1, CXCL6, ITGA9, IL1B, FUT7, MYD88, DPP4, ADAM8, SYK, CXCR1, RHOG, TREM1, MOSPD2, ITGB2, PTK2, CD177, PPIA, CXCL8, MPP1, WDR1, VAV3, MAPK3, JAML, EDN1, UMODL1
GOBP	GOBP_TUMOR_NECROSIS_FACTOR_SUPERFAMILY_CYTOKINE_PRODUCTION	5.16459e-12	5.18449e-10	0.887075	0.545275	2.35231	133	CLU, CX3CR1, PTAFR, CCR2, TNFRSF8, TREM2, LILRA5, THBS1, NOD2, PYCARD, CARD9, LILRB4, IRAK3, LY96, BCL3, CLEC7A, TLR2, CD14, TSPO, AZU1, CCL3, CYBB, IL10, GPNMB, LPL, TYROBP, TLR4, CD36, VSIR, PF4, C5AR2, IL1A, TREX1, TLR1, CLEC4A, APP, EPHB2, GSTP1, IFNGR1, CYBA, LILRA2, TMEM106A, MYD88, GAS6, TICAM1, ADAM8, SYK, MAPKAPK2, IL6, ARG2, PSEN1, CD274, SPN, CD86, SYT11, PTPN6, STAT3, PTPRJ
GOBP	GOBP_REGULATION_OF_SECRETION	7.40167e-12	7.33578e-10	0.875325	0.417291	2.00418	363	ALOX5, NRG1, WLS, TRPM4, PTGES, PTAFR, RAB3D, CCR2, P2RY2, GLUL, ADGRE2, FGR, TREM2, S100A8, HMOX1, FCGR2B, OSM, MCTP1, ITGAM, TNFRSF1A, CD300A, SPI1, RETN, ICA1, GATA2, FES, HFE, SCIN, P2RX1, DAB2, TLR2, SEPTIN5, RHBDF2, FKBP1B, LIF, GPR27, TIFAB, LYN, KCNQ1, TNFRSF11A, SDCBP, FRMD4A, TCIRG1, TNFRSF1B, BRSK2, UNC13B, TLR4, RAB13, TPCN2, ANG, PRAM1, NR1H3, IL1A, ATP2A2, ADORA2B, GAB2, HIF1A, BMP6…
KEGG	KEGG_CYTOKINE_CYTOKINE_RECEPTOR_INTERACTION	7.42742e-12	7.33578e-10	0.875325	0.534973	2.34934	146	PPBP, CCL23, CX3CR1, CCR2, TNFRSF8, OSM, TNFRSF1A, TNFSF12, CXCL1, IFNGR2, IL1RAP, CCL2, CCL20, CXCL16, CSF3R, IL18, LIF, LTBR, IL1R1, HGF, CCL3, CXCL3, IL10, TNFRSF11A, CCL8, TNFRSF1B, CSF2RB, TNFSF13B, PF4V1, CCR1, TNFRSF21, PF4, VEGFA, IL1A, CSF1R, PLEKHO2, CCL7, CXCL6, IL13RA1, IFNGR1, IL1B, IFNAR2, IL15RA, TNFRSF10A, RELT, TGFBR1, CXCL14, IL1R2, CXCR1, IL6, IL22, TNF
GOBP	GOBP_MRNA_CATABOLIC_PROCESS	8.79079e-12	8.54451e-10	0.875325	-0.434627	-2.27478	195	CNOT8, TENT5C, ZC3HAV1, SMG8, PDE12, GTPBP1, FASTKD1, HNRNPU, HNRNPA0, CNOT6L, ZFP36L2, CASC3, CSDE1, FASTKD5, TENT2, ERI1, PELO, GSPT1, TOB1, ROCK2, PUM1, ZHX2, EIF4A3, CNOT2, SMG5, GSPT2, PNRC2, METTL14, CNOT1, HNRNPD, TNRC6C, POLR2D, UPF2, CNOT7, AXIN2, AGO3, CARHSP1, NPM1, DHX9, YTHDF2, SMG7, PCID2, NUDT12, RC3H2, EXOSC9, EIF4ENIF1, TNRC6B, BTG2, SMG6, FASTKD2, CNOT6, EXOSC4, AGO1, EDC4, ALKB…
GOBP	GOBP_POSITIVE_REGULATION_OF_TUMOR_NECROSIS_FACTOR_SUPERFAMILY_CYTOKINE_PRODUCTION	8.78844e-12	8.54451e-10	0.875325	0.604347	2.45679	87	CLU, PTAFR, CCR2, TNFRSF8, LILRA5, THBS1, NOD2, PYCARD, CARD9, LY96, CLEC7A, TLR2, CD14, AZU1, CCL3, CYBB, LPL, TYROBP, TLR4, CD36, PF4, IL1A, TLR1, APP, EPHB2, IFNGR1, CYBA, LILRA2, TMEM106A, MYD88, TICAM1, ADAM8, SYK, MAPKAPK2, IL6, PSEN1, SPN, CD86, STAT3, PTPRJ, OAS1, RIPK2
REACTOME	REACTOME_MRNA_SPLICING	8.89755e-12	8.58018e-10	0.875325	-0.451328	-2.30691	167	CSTF2T, PLRG1, SF1, SYF2, HNRNPU, HNRNPA0, RBM5, CPSF7, WBP11, PRPF38A, CASC3, BCAS2, SF3B4, SRSF6, CCAR1, PPWD1, SF3B1, WDR33, SRSF2, EIF4A3, BUD31, HNRNPD, CDC5L, POLR2D, HNRNPUL1, CLP1, HNRNPK, NUDT21, TFIP11, SRSF5, CWC22, DHX9, SNRPB2, PRPF4, CSTF1, PPIE, SNU13, DDX23, PRCC, CSTF3, CD2BP2, PAPOLA, SNRNP48, SRRM1, SF3A1, SF3B3, U2SURP, RBM8A, SNRNP27, SLU7, SNRPN, HNRNPC, SNRNP70, DNAJC8, POL…
GOBP	GOBP_NEUTROPHIL_MIGRATION	1.09799e-11	1.05055e-09	0.875325	0.59836	2.43848	89	PPBP, CCL23, S100A12, S100A9, S100A8, LGALS3, NOD2, TNFAIP6, CXCL1, CCL2, CCL20, CD300H, CSF3R, IL1R1, CCL3, CXCL3, C5AR1, C3AR1, CCL8, FCER1G, PF4V1, PF4, C5AR2, IL1A, CCL7, CXCL6, ITGA9, IL1B, FUT7, MYD88, DPP4, ADAM8, SYK, CXCR1, RHOG, TREM1, MOSPD2, ITGB2, CD177, PPIA, CXCL8, MPP1, WDR1, VAV3, JAML, EDN1, UMODL1
REACTOME	REACTOME_CYTOKINE_SIGNALING_IN_IMMUNE_SYSTEM	1.1487e-11	1.09055e-09	0.875325	0.376744	1.85427	529	BATF, ALOX5, S100A12, PTAFR, FCGR1A, CCR2, SOD2, HCK, F13A1, TNIP2, TNFRSF8, FPR1, HMOX1, LCN2, GRB10, MAOA, OSM, PTPN18, UBE2M, NOD2, TIMP1, MMP1, ITGAM, TNFRSF1A, TNFSF12, CXCL1, IFNGR2, MAPK11, IL1RAP, CCL2, IRAK3, CCL20, IFI30, DUSP6, CASP1, RHOU, CSF3R, IL18, LIF, LTBR, IL1R1, HGF, FN1, CCL3, LYN, IL10, TNFRSF11A, MMP9, IL1RN, PTPN1, TNFRSF1B, CSF2RB, TNFSF13B, CD36, SOCS2, CEBPD, CCR1, VEGF…
GOBP	GOBP_POSITIVE_REGULATION_OF_IMMUNE_SYSTEM_PROCESS	1.21721e-11	1.1467e-09	0.875325	0.367972	1.82493	608	CLU, CX3CR1, PTAFR, CCR2, AQP3, ADGRE2, HCK, VNN1, SELP, FGR, TNIP2, TREM2, FPR3, FPR1, HMOX1, LGALS3, FCGR2B, NECTIN2, STING1, SLC11A1, THBS1, NOD2, FPR2, HLX, PYCARD, ITGAM, CARD9, LILRB4, CD300A, SPI1, FCN1, AIF1, HES1, GATA2, FES, CCL2, IRAK3, CCL20, CTSC, CLEC7A, LGMN, VSIG4, NOTCH2, IL18, SERPINE1, LIF, IL1R1, COCH, TRIB1, NFAM1, CCL3, SH2B2, LYN, IL10, SRC, C5AR1, ACOD1, C3AR1, PDCD1LG2, C…
GOBP	GOBP_CATION_TRANSMEMBRANE_TRANSPORT	1.59032e-11	1.48677e-09	0.863415	0.380459	1.87098	496	TRPM6, TRPM4, CCR2, SLC47A1, TREM2, STOM, SLC31A1, SLC31A2, SLC11A1, SLC46A1, TMEM37, ATP6V0D2, SLC1A3, DAPK1, KCNK13, SLC39A4, IFNGR2, SLC22A4, CCL2, KCNMB1, HFE, ITGAV, P2RX1, NOL3, FKBP1B, RHAG, CTSS, CCL3, LYN, KCNQ1, G6PD, SLC39A1, ATP6V1A, MMP9, TCIRG1, SLC25A37, SLC43A2, GEM, TPCN2, ATP6V0D1, COX6B1, VMP1, CLCN5, STAC3, ATP2A2, GPR35, SLC6A6, SLC6A9, SLC36A4, YWHAE, GRIN2C, SLC24A3, PRKACA…
GOBP	GOBP_CATION_TRANSPORT	1.6029e-11	1.48717e-09	0.863415	0.360331	1.79658	651	TRPM6, TRPM4, CCR2, SLC47A1, TREM2, STEAP3, LCN2, STOM, LGALS3, LILRA5, SLC31A1, VDR, SLC31A2, SLC11A1, SLC46A1, TMEM37, ATP6V0D2, SLC1A3, DAPK1, KCNK13, CYBRD1, SLC39A4, IFNGR2, HES1, SLC22A4, CCL2, KCNMB1, HFE, ITGAV, P2RX1, NOL3, FKBP1B, RHAG, CTSS, TSPO, CCL3, LYN, KCNQ1, G6PD, SLC39A1, ATP6V1A, MMP9, CCL8, SERINC5, TCIRG1, SLC25A37, SLC43A2, CCR1, GEM, TPCN2, FLVCR2, ATP6V0D1, COX6B1, VMP1, …
GOBP	GOBP_NUCLEAR_TRANSCRIBED_MRNA_CATABOLIC_PROCESS	1.68118e-11	1.54808e-09	0.863415	-0.520283	-2.52144	108	CNOT8, SMG8, PDE12, HNRNPU, CNOT6L, ZFP36L2, CASC3, CSDE1, TENT2, ERI1, PELO, GSPT1, TOB1, EIF4A3, CNOT2, SMG5, GSPT2, PNRC2, CNOT1, HNRNPD, TNRC6C, POLR2D, UPF2, CNOT7, DHX9, SMG7, PCID2, RC3H2, EXOSC9, EIF4ENIF1, TNRC6B, BTG2, SMG6, CNOT6, EXOSC4, AGO1, EDC4, ATM, RBM8A, UPF1, PAIP1, NT5C3B, PATL2, EXOSC8, MTPAP, PYM1, EXOSC2, DCP1B, PRPF18, DIS3, SMG9, EXOSC3, SKIV2L, EDC3, DCP1A, TUT4, EXOSC1…
GOBP	GOBP_GLIOGENESIS	1.78433e-11	1.61872e-09	0.863415	0.487857	2.19565	187	CLU, NRG1, CX3CR1, CD9, S100A9, CCR2, TREM2, S100A8, FPR2, SPINT1, LDLR, GRN, HES1, CCL2, LRP1, TLR2, LIF, TSPO, AZU1, B4GALT5, CCL3, LYN, C5AR1, PRKCI, TNFRSF1B, P2RY12, TLR4, TNFRSF21, CSF1R, CDK6, GFAP, APP, IFNGR1, IL1B, P2RY1, GPR157, HEXB, NOTCH1, VIM, PLEC, LAMB2, MBOAT7, TTBK1, RTN4, IL6, NCSTN, TNF, DISC1, SYNE2, CDK5, PSEN1, GBA, ARHGEF10, PARD3, SERPINE2, EGR2, CERS2, ILK, SIRT2, STAT3…
GOBP	GOBP_SMALL_MOLECULE_METABOLIC_PROCESS	1.77625e-11	1.61872e-09	0.863415	0.318309	1.61487	1174	ABCG4, ADM, UPP1, ALOX5, PTGES, PTAFR, ALDH3B1, GLUL, VNN1, TBXAS1, TREM2, SPTSSA, HK3, DPYD, ALOX5AP, GUCY1B1, SPHK1, SLC46A1, SLC1A3, SLC7A7, HK2, PAPSS2, SMPDL3A, TNFRSF1A, CYP39A1, ALDH1A1, DAGLB, LDLR, IMPDH1, ENTPD1, DHRS7, PCBD1, IGFBP4, ENO1, HACD4, CYP3A5, MTHFD2, LGMN, DAB2, TLR2, EPHX3, GUCY1A1, IDH1, SPTLC2, CHST15, PRKAR2B, ASAH1, NQO2, HAL, GATM, AOAH, FUCA1, NAPRT, SOAT1, KCNQ1, AC…
GOBP	GOBP_ANATOMICAL_STRUCTURE_FORMATION_INVOLVED_IN_MORPHOGENESIS	1.86884e-11	1.68292e-09	0.863415	0.355085	1.77444	689	ADM, ALOX5, WLS, CX3CR1, CD9, ENG, NIBAN2, CCR2, GLUL, ITGB5, EMILIN2, TREM2, FAM20A, STAB1, HMOX1, SBNO2, NECTIN2, SPHK1, NRP1, EGFL7, THBS1, PTPN18, HTRA1, ANXA3, HK2, SPINT1, TNFSF12, MMP19, CLDN5, GRN, HES1, GATA2, CCL2, BCL3, ITGAV, ANPEP, TLR2, MPIG6B, PLXNB2, NOTCH2, IL18, SERPINE1, PRCP, JAG1, TIFAB, TEK, FLOT1, HGF, FN1, MYOF, SPRED1, CYBB, IL10, GPNMB, C5AR1, C3AR1, MMP9, CCL8, ITGA2B, …
GOBP	GOBP_PROTEIN_MODIFICATION_BY_SMALL_PROTEIN_CONJUGATION	1.98215e-11	1.77193e-09	0.863415	-0.287301	-1.69832	702	SMAD7, HLTF, OBI1, MEX3C, ASB1, BAG5, FBXL14, VPS18, TNFAIP3, TPP2, BIRC2, MYLIP, KLHL7, MARCHF3, SIAH2, MARCHF5, LNX2, HERC4, RNF103, HECTD1, CDC23, TAF1, WAC, SKP2, SOCS5, JADE2, GID4, G2E3, FBXL3, SMURF2, DCAF5, RNF139, SIRT1, MOCS3, RNF26, SENP2, FBXL5, WDR48, FBXO33, BCL10, UHRF2, FBXW8, KLHL3, RMND5A, PJA1, HERC3, RNF122, UBE2J1, ITCH, SPOP, RAD18, RNF38, TOPORS, UBE2O, AMBRA1, BUB3, DCAF1,…
GOBP	GOBP_POSITIVE_REGULATION_OF_CYTOKINE_PRODUCTION	2.15982e-11	1.91676e-09	0.863415	0.41568	1.99015	344	CLU, TLR5, BATF, PTAFR, CCR2, FGR, TNFRSF8, TREM2, MEFV, HMOX1, LILRA5, SPHK1, STING1, SLC11A1, THBS1, OSM, NOD2, PYCARD, CARD9, FCN1, AIF1, MAPK11, IL1RAP, IRAK3, LY96, BCL3, STMP1, CLEC7A, TLR2, CASP1, IL18, SERPINE1, CD14, IL1R1, AZU1, FLOT1, HGF, NFAM1, CCL3, CYBB, IL10, SRC, C5AR1, LPL, C3AR1, TYROBP, FCER1G, TLR8, TLR4, CD36, NLRC4, SCIMP, PF4, TLR6, PLCB1, IL1A, CSF1R, ADORA2B, TLR1, HIF1A…
REACTOME	REACTOME_INTERLEUKIN_10_SIGNALING	2.28004e-11	2.00889e-09	0.863415	0.756597	2.56504	36	PTAFR, CCR2, FPR1, TIMP1, TNFRSF1A, CXCL1, CCL2, CCL20, IL18, LIF, IL1R1, CCL3, IL10, IL1RN, TNFRSF1B, CCR1, IL1A, IL1B, ICAM1, IL1R2, IL6, TNF, CD86, CCR5, CXCL8, STAT3, PTGS2
GOBP	GOBP_MONOCYTE_CHEMOTAXIS	2.58692e-11	2.263e-09	0.863415	0.764093	2.60164	37	CCL23, CX3CR1, S100A12, CCR2, LGALS3, FPR2, AIF1, CCL2, CCL20, LGMN, SERPINE1, CCL3, LYN, TNFRSF11A, CCL8, CCR1, CCL7, PLA2G7, FOLR2, IL6, MOSPD2, CREB3, ANO6
GOBP	GOBP_POSITIVE_REGULATION_OF_PHAGOCYTOSIS	3.68711e-11	3.20256e-09	0.851339	0.689109	2.53731	52	TREM2, FCGR2B, RAB31, SLC11A1, MERTK, NOD2, FPR2, PYCARD, FCN1, GATA2, CCL2, CD300LF, CLEC7A, AZU1, FCER1G, CD36, ITGA2, PTX3, IL1B, CYBA, LMAN2, IL15RA, GAS6, C3, RAB27A, TNF, ABCA7, PTPRJ, ANO6, FCN2, CALR
GOBP	GOBP_MYELOID_LEUKOCYTE_MEDIATED_IMMUNITY	3.86371e-11	3.33232e-09	0.851339	0.60142	2.4098	83	CX3CR1, PTAFR, FCGR1A, CCR2, ADGRE2, FGR, HMOX1, FCGR2B, ANXA3, ITGAM, CARD9, CD300A, SPI1, GATA2, FES, AZU1, CCL3, LYN, TYROBP, PRAM1, ADORA2B, GAB2, CXCL6, MYD88, TICAM1, PTGDS, C3, SYK, IL6, ADAM17, TREM1, RABGEF1, STXBP2, ITGB2, CD177, LAT2, BTK, WDR1
GOBP	GOBP_CELL_ACTIVATION_INVOLVED_IN_IMMUNE_RESPONSE	4.99381e-11	4.27686e-09	0.851339	0.459532	2.13126	223	BATF, CX3CR1, PTAFR, CCR2, ADGRE2, DYSF, FGR, TREM2, HMOX1, LGALS3, SBNO2, FCGR2B, SLC11A1, ANXA3, HLX, PYCARD, ITGAM, CD300A, SPI1, GRN, GATA2, FES, FGL2, LRP1, BCL3, CLEC7A, NOTCH2, IL18, CCL3, LYN, CD180, IL10, TYROBP, FCER1G, TLR4, PRAM1, SEMA4A, TREX1, ADORA2B, MYB, GAB2, LOXL3, APP, NLRP3, BCL6, LILRA2, MYD88, FER1L5, ICAM1, TICAM1, PTGDS, RAB27A, LCP1, SYK, LAMP1, IL6, IFI35, CLEC4E, PSEN1…
bioplanet	bioplanet_Response to elevated platelet cytosolic calcium	5.42194e-11	4.61128e-09	0.851339	0.669823	2.52907	55	CLU, PPBP, CD9, F13A1, VWF, SELP, SERPINA1, ABCC4, THBS1, PSAP, TIMP1, VCL, SERPINE1, HGF, FN1, ITGA2B, CD36, PF4, VEGFA, CFD, PLEK, SPARC, APP, LAMP2, CFL1, GAS6, TLN1, CAP1, PROS1, PPIA, CALU, SERPING1, WDR1
GOBP	GOBP_ANTIMICROBIAL_HUMORAL_RESPONSE	6.40045e-11	5.40595e-09	0.839089	0.763181	2.5576	34	PPBP, S100A12, S100A9, SLC11A1, NOD2, CXCL1, BCL3, RNASE6, AZU1, CXCL3, ACOD1, LYZ, PF4V1, PF4, ANG, CXCL6, GAPDH, CAMP, CXCL14
GOBP	GOBP_POSITIVE_REGULATION_OF_ERK1_AND_ERK2_CASCADE	6.89672e-11	5.78522e-09	0.839089	0.547055	2.31988	117	CCL23, MARCO, NRG1, TNFAIP8L3, TREM2, NRP1, NOD2, FPR2, PYCARD, CARD9, CCL2, CCL20, CAVIN3, NOTCH2, TEK, CCL3, GPNMB, SRC, TNFRSF11A, C5AR1, CCL8, NPTN, TLR4, CD36, SCIMP, CCR1, C5AR2, IL1A, CSF1R, CCL7, ARRB1, APP, P2RY1, FFAR4, NOTCH1, GAS6, ICAM1, PDE8A, MTURN, CIB1, GLIPR2, SPRY2, TNF, ABCA7, P2RY6, NELFE, APOE, MAPK3, CD44, RIPK2, RAP1A
GOBP	GOBP_POSITIVE_REGULATION_OF_MRNA_METABOLIC_PROCESS	7.14568e-11	5.95327e-09	0.839089	-0.52104	-2.50137	104	CNOT8, ZC3HAV1, PDE12, GTPBP1, HNRNPU, CNOT6L, ZFP36L2, CSDE1, SF3B4, TOB1, ROCK2, PUM1, CNOT2, METTL14, CNOT1, HNRNPD, TNRC6C, DAZAP1, POLR2D, NUDT21, CNOT7, CDC73, DHX9, YTHDF2, PAF1, RC3H2, EXOSC9, EIF4ENIF1, NCL, TNRC6B, BTG2, CNOT6, CELF1, GIGYF2, UPF1, PAIP1, NT5C3B, RBMXL1, PATL2, EXOSC8, EXOSC2, DCP1B, SNRNP70, DIS3, METTL16, YTHDF1, EXOSC3, TRA2B, DCP1A, TTC5, PNPT1, TUT4, DIS3L2, ZFP36,…
GOBP	GOBP_POSITIVE_REGULATION_OF_INTRACELLULAR_SIGNAL_TRANSDUCTION	8.63444e-11	7.145e-09	0.839089	0.350377	1.74774	672	CCL23, MARCO, NRG1, WLS, CX3CR1, S100A12, S100A9, ENG, VWF, SELP, FGR, TNFAIP8L3, TNIP2, RASGRP4, TREM2, S100A8, HMOX1, LILRA5, FCGR2B, SPHK1, NRP1, THBS1, OSM, NOD2, FPR2, S100A4, PYCARD, CARD9, TNFRSF1A, SPI1, GSDME, CCL2, IGFBP4, CCL20, CAVIN3, ITGAV, CLEC7A, NAIP, TLR2, CASP1, GUCY1A1, RRAGC, NOTCH2, IL18, LIF, CD14, LTBR, TEK, HGF, NACC2, FN1, CCL3, SPRED1, MAP3K20, LYN, GPNMB, SRC, TNFRSF11…
GOBP	GOBP_REGULATED_EXOCYTOSIS	8.92168e-11	7.33314e-09	0.839089	0.501452	2.22184	156	PTAFR, RAB3D, CCR2, ADGRE2, HCK, FGR, ABCC4, HMOX1, FCGR2B, RAB31, ANXA3, ITGAM, CD300A, SPI1, GATA2, FES, CTBP2, SCIN, STX11, P2RX1, SEPTIN5, CCL3, LYN, UNC13B, PRAM1, ATP2A2, ADORA2B, GAB2, SYN1, PLEK, RAB11FIP5, PPFIA3, STX1A, P2RY1, CBARP, RAB10, RIMS3, NOTCH1, PTGDS, APBA1, CALM3, RAB27A, SYK, SYNGR2, RAB11FIP1, LAMP1, CDK5, PSEN1, RABGEF1, BLOC1S6, STXBP2, ITGB2, CD177, SNAP29, SYT11, LAT2,…
GOBP	GOBP_DIVALENT_INORGANIC_CATION_HOMEOSTASIS	9.37221e-11	7.6521e-09	0.839089	0.426833	2.01622	296	CCL23, ADM, CX3CR1, TRPM4, S100A9, CCR2, SNX10, FAM20A, S100A8, FPR3, FPR1, VDR, SLC11A1, FPR2, SLC39A4, GATA2, ITGAV, P2RX1, NOL3, FKBP1B, CCL3, LYN, PTGER2, C5AR1, C3AR1, CCL8, TCIRG1, NPTN, CD36, CCR1, TPCN2, C5AR2, ATP2A2, GPR35, MT1X, WFS1, CCL7, CMKLR1, YWHAE, GRIN2C, MT2A, SLC24A3, PRKACA, ATP2C1, APP, CCRL2, SLC8A1, CDH23, GP1BA, SLC8B1, CYBA, P2RY1, CAPN3, GNA15, FFAR4, GSTO1, GP9, GPR15…
GOBP	GOBP_POSITIVE_REGULATION_OF_LEUKOCYTE_MIGRATION	1.10561e-10	8.96712e-09	0.839089	0.568619	2.36302	102	CX3CR1, PTAFR, CCR2, SELP, TREM2, LGALS3, THBS1, FPR2, PYCARD, SPI1, AIF1, CCL20, LGMN, SERPINE1, IL1R1, CCL3, C5AR1, C3AR1, CCL8, P2RY12, ITGA2, CCR1, VEGFA, IL1A, CSF1R, CCL7, CMKLR1, APP, FUT7, GAS6, ICAM1, PLA2G7, ADAM8, IL6, TNF, ADAM17, MOSPD2, PTK2, SPN, CXCL8, PLVAP, CREB3, ANO6, MAPK3, CALR, OXSR1, EDN1, P2RX4
REACTOME	REACTOME_GPCR_LIGAND_BINDING	1.16583e-10	9.39338e-09	0.826657	0.490575	2.19187	173	PPBP, CCL23, ADM, CX3CR1, PTAFR, CCR2, P2RY2, ADGRE2, HTR7, FPR3, FPR1, FPR2, ADGRE1, PSAP, CXCL1, GNB4, CCL2, CCL20, CXCL16, CCL3, CXCL3, PTGER2, C5AR1, C3AR1, P2RY13, P2RY12, CCR1, PF4, C5AR2, OXER1, GPR35, ADORA2B, CCL7, CMKLR1, CXCL6, HEBP1, APP, CCRL2, GNG11, P2RY1, FFAR4, PLPPR2, ADRB2, HRH2, PTGIR, ADGRE5, C3, NLN, CXCR1, GNB1, RAMP2, GNG5, P2RY6, LTB4R, CCR5, CXCL8, CYSLTR2, SUCNR1, GNB2,…
bioplanet	bioplanet_Metabolism	1.18718e-10	9.50287e-09	0.826657	0.319118	1.61321	1054	UPP1, NDUFS8, ALOX5, PTGES, ALDH3B1, GLUL, TBXAS1, HK3, DPYD, HMOX1, MGST1, SPHK1, MAOA, ATP6V0D2, HK2, UGCG, PAPSS2, CYP39A1, ALDH1A1, LDLR, GNB4, IMPDH1, PLD1, PGAP1, PCBD1, ENO1, CYP3A5, MTHFD2, ANPEP, LGMN, BLVRB, G0S2, IDH1, SPTLC2, CHST15, ASAH1, HAL, B4GALNT1, GATM, PCYT1A, B4GALT5, MOCOS, NAPRT, ACSL1, ETHE1, G6PD, MARCKS, ATP6V1A, DGAT2, LPL, MGST2, PGD, TCIRG1, ABCC3, GALK1, CD36, LPCAT…
GOBP	GOBP_MICROGLIAL_CELL_ACTIVATION	1.30654e-10	1.03904e-08	0.826657	0.733857	2.55509	39	CLU, CX3CR1, TREM2, SPHK1, FPR2, ITGAM, LDLR, GRN, IFNGR2, AIF1, CTSC, TLR2, AZU1, CCL3, C5AR1, TYROBP, TLR6, APP, IFNGR1, TTBK1, IL6, TNF, ITGB2, SYT11
HALLMARK	HALLMARK_TNFA_SIGNALING_VIA_NFKB	1.41325e-10	1.11665e-08	0.826657	0.482449	2.16938	179	SOD2, DRAM1, TNIP2, PLAU, SPHK1, PLAUR, TNFAIP6, CXCL1, LDLR, IFNGR2, HES1, CCL2, CCL20, BCL3, FOSL1, TLR2, G0S2, IL18, SERPINE1, LIF, JAG1, NFIL3, TRIB1, B4GALT5, CXCL3, PTPRE, MARCKS, PHLDA1, HBEGF, CEBPD, GEM, SLC2A6, LITAF, PTX3, VEGFA, IL1A, PFKFB3, TNFAIP2, KYNU, KLF4, CXCL6, SGK1, MAP3K8, CEBPB, F3, PLEK, IER3, BHLHE40, CCRL2, ETS2, IL1B, MAP2K3, BCL6, SAT1, CDKN1A, IL15RA, OLR1, ICAM1, RH…
GOBP	GOBP_BLOOD_VESSEL_MORPHOGENESIS	1.44346e-10	1.13321e-08	0.826657	0.397364	1.91289	382	ADM, ALOX5, CX3CR1, ENG, NIBAN2, CCR2, GLUL, EMILIN2, STAB1, HMOX1, SPHK1, NRP1, EGFL7, THBS1, ANXA3, HK2, TNFSF12, SPI1, MMP19, LDLR, CLDN5, GRN, HES1, GATA2, CCL2, LRP1, ITGAV, ANPEP, NOTCH2, IL18, SERPINE1, PRCP, JAG1, TEK, HGF, FN1, SPRED1, CYBB, IL10, GPNMB, C5AR1, C3AR1, CCL8, ITGA2B, ECM1, SASH1, PF4, ANG, SEMA4A, VEGFA, COMP, MYLK, IL1A, TGFBI, TNFAIP2, KLF4, HIF1A, F3, SPARC, ANXA2, EPHB…
REACTOME	REACTOME_LEISHMANIA_INFECTION	1.47162e-10	1.14796e-08	0.826657	0.498378	2.20821	156	ADM, FCGR1A, HCK, HTR7, CYFIP1, FGR, MEFV, HMOX1, CD163, PYCARD, GNB4, ENTPD1, BAIAP2, CASP1, RHBDF2, PRKAR2B, IL18, GPR27, LYN, PTGER2, IL10, SRC, C3AR1, IL1A, ADORA2B, YES1, GPR84, PRKACA, GSDMD, APP, GNG11, IL1B, NLRP3, CYBA, ADCY4, BRK1, ARPC3, FURIN, ADRB2, HRH2, PTGIR, C3, SYK, NCKAP1, GNB1, IL6, ACTG1, ADAM17, RAMP2, DVL3, GNG5, GGT5, PTK2, CYSLTR2, MYO10, BTK, GNB2, VAV3, MAPK3, MYO1C, GN…
GOBP	GOBP_RNA_CATABOLIC_PROCESS	1.59491e-10	1.23625e-08	0.826657	-0.388893	-2.07112	235	CNOT8, TENT5C, ZC3HAV1, SMG8, SLFN13, PDE12, GTPBP1, PHAX, FASTKD1, HNRNPU, HNRNPA0, CNOT6L, ZFP36L2, CASC3, CSDE1, FASTKD5, TENT2, ERI1, PELO, GSPT1, NSUN2, TOB1, ROCK2, PUM1, ZHX2, EIF4A3, CNOT2, SMG5, GSPT2, PNRC2, METTL14, CNOT1, HNRNPD, TNRC6C, POLR2D, UPF2, CNOT7, AXIN2, RBM7, AGO3, CARHSP1, NPM1, DHX9, YTHDF2, SMG7, DROSHA, PCID2, NUDT12, RC3H2, EXOSC9, EIF4ENIF1, MRPL44, TNRC6B, BTG2, SMG…
GOBP	GOBP_ACTIN_FILAMENT_BASED_PROCESS	1.7032e-10	1.3119e-08	0.826657	0.364719	1.79647	536	MYH14, MYO7A, TRPM4, HCK, CYFIP1, ITGB5, MSRB1, NRP1, CDC42BPA, PYCARD, CXCL1, PSTPIP2, CDC42EP2, AIF1, ZYX, FES, BAIAP2, SCIN, LRP1, CAVIN3, TMSB10, RHOU, NOTCH2, TEK, MYO1F, KCNQ1, MARCKS, SSH3, SRC, GAS2L1, CYRIA, SDCBP, PTPN1, TYROBP, PRKCI, BRSK2, CAPG, PXN, ABI3, RAB13, ANG, MTSS1, IL1A, ATP2A2, CSF1R, TPM4, IQSEC2, CDC42EP3, ARHGAP6, CAPZB, CTNNA1, ARRB1, WASHC3, FARP1, ATP2C1, PLEK, CDC42…
GOBP	GOBP_REGULATION_OF_TRANSMEMBRANE_TRANSPORT	1.73459e-10	1.32772e-08	0.826657	0.418462	1.9875	313	PTAFR, CCR2, TREM2, STOM, GRB10, SLC31A2, THBS1, TMEM37, HK2, DAPK1, KCNK13, IFNGR2, CCL2, KCNMB1, P2RX1, FKBP1B, CTSS, CYBB, LYN, KCNQ1, ACSL1, G6PD, MMP9, CLIC1, PRKCI, TCIRG1, SLC43A2, GEM, TPCN2, VMP1, STAC3, GPR35, SLC6A9, OAZ1, YWHAE, YES1, PRKACA, RHOQ, APP, SLC8A1, EPHB2, PID1, KCNK6, IL1B, CYBA, CBARP, CAPN3, KCNH3, FFAR4, GSTO1, KCNH4, ADRB2, ATP1B3, KCND1, CAPN1, EHD3, C3, TMEM38B, SLC…
GOBP	GOBP_RECEPTOR_MEDIATED_ENDOCYTOSIS	2.05742e-10	1.56505e-08	0.826657	0.489413	2.19543	176	CLU, MARCO, ADM, CD9, STAB1, LDLRAD3, FCGR2B, RAB31, MSR1, FPR2, SCARB2, ITGAM, LILRB4, LDLR, HFE, CTSL, LRP1, AP2A1, CXCL16, ITGAV, DAB2, SERPINE1, CD14, FLOT1, SDCBP, FCER1G, ITSN1, CD36, DNM1, TPCN2, VEGFA, ARRB1, ANXA2, CTTN, MRC1, SCARF1, APP, HIP1, PPT1, ADRB2, C3, TNK2, SYK, CXCR1, ANKRD13D, PICALM, CLTB, CAP1, RAMP2, PSEN1, DBNL, INSR, RABGEF1, GRK3, ITGB2, STAB2, LRRTM2, CXCL8, NUMB, SIG…
GOBP	GOBP_REGULATION_OF_ION_TRANSPORT	2.20789e-10	1.66914e-08	0.826657	0.403814	1.93352	352	PTGES, PTAFR, CCR2, TREM2, STOM, LGALS3, LILRA5, SLC31A2, TMEM37, DAPK1, KCNK13, IFNGR2, HES1, CCL2, KCNMB1, HFE, P2RX1, FKBP1B, CTSS, TSPO, CCL3, CYBB, LYN, KCNQ1, G6PD, TNFRSF11A, MMP9, CLIC1, TCIRG1, P2RY12, SLC43A2, CCR1, GEM, TPCN2, VMP1, STAC3, MYLK, IL1A, GPR35, SLC6A9, WFS1, YWHAE, PRKACA, CEBPB, APP, SLC8A1, EPHB2, KCNK6, IL1B, SLC8B1, CYBA, P2RY1, CBARP, CAPN3, LILRA2, KCNH3, GSTO1, KCN…
GOBP	GOBP_DNA_CONFORMATION_CHANGE	2.26279e-10	1.70015e-08	0.826657	-0.380303	-2.03077	243	BRD2, SMARCA5, TSPYL2, NAP1L2, TSPYL1, PPM1D, CHTF18, CHD2, SIRT1, RESF1, WAPL, HJURP, KAT6A, RIF1, SPTY2D1, MRE11, POT1, WRNIP1, PIK3CA, TASOR, HELQ, BLM, TOP2B, RFC5, ASIP, XRCC6, EZH1, FANCM, GINS3, AXIN1, TSPYL4, CHRAC1, GRWD1, MORC2, ATF7IP2, NPM1, DHX9, ASF1A, HDAC1, ZNF304, ATF7IP, DDX3X, PAF1, SETX, MTERF1, TOP3B, SART3, AKAP8L, TP53, RRP8, KAT6B, AKAP8, UPF1, NAP1L5, CABIN1, LMNTD2, CENP…
GOBP	GOBP_REGULATION_OF_MYELOID_LEUKOCYTE_MEDIATED_IMMUNITY	2.63177e-10	1.96532e-08	0.814036	0.683423	2.50026	49	CX3CR1, PTAFR, CCR2, ADGRE2, FGR, HMOX1, FCGR2B, ITGAM, CD300A, SPI1, GATA2, FES, LYN, TYROBP, PRAM1, ADORA2B, GAB2, CXCL6, TICAM1, C3, SYK, RABGEF1, STXBP2, ITGB2, CD177, BTK
REACTOME	REACTOME_REGULATION_OF_INSULIN_LIKE_GROWTH_FACTOR_IGF_TRANSPORT_AND_UPTAKE_BY_INSULIN_LIKE_GROWTH_FACTOR_BINDING_PROTEINS_IGFBPS	2.70183e-10	2.00541e-08	0.814036	0.646529	2.45355	59	SERPINA1, FAM20A, TIMP1, MMP1, IGFBP4, LAMC1, FN1, VCAN, CKAP4, APLP2, WFS1, APP, LTBP1, CST3, QSOX1, GAS6, NUCB1, C3, VWA1, LAMB2, MMP2, SDC2, IL6, SPP1, PDIA6, ANO8, CALU, APOE, GOLM1, P4HB, IGFBP6, FAM20C, FUCA2, IGFBP2
GOBP	GOBP_CELL_CELL_ADHESION	3.07972e-10	2.27213e-08	0.814036	0.364103	1.79289	533	EMB, ALOX5, CX3CR1, CD9, S100A9, PTAFR, CCR2, CSTA, VNN1, SELP, ITGB5, EMILIN2, S100A8, LGALS3, FCGR2B, NECTIN2, PLAUR, BVES, CD93, NOD2, HLX, ALCAM, PYCARD, ITGAM, LILRB4, CD300A, SPI1, CLDN5, AIF1, VCL, HES1, FGL2, IL1RAP, BAIAP2, CCL2, HFE, ITGAV, CLEC7A, VSIG4, MPZL2, PLXNB2, IL18, JAG1, FLOT1, LPP, FN1, LYN, IL10, GPNMB, SRC, CLIC1, IL1RN, PDCD1LG2, ITGA2B, P2RY12, TNFSF13B, NPTN, ITGA2, TNF…
GOBP	GOBP_REGULATION_OF_IMMUNE_RESPONSE	3.15279e-10	2.31211e-08	0.814036	0.356768	1.76841	593	CLU, TLR5, TRPM4, PTAFR, FCGR1A, CCR2, ADGRE2, HCK, FGR, TNIP2, TREM2, FPR3, FPR1, HMOX1, LGALS3, FCGR2B, NECTIN2, STING1, SLC11A1, NOD2, FPR2, HLX, PYCARD, ITGAM, CARD9, LILRB4, CD300A, SPI1, GRN, FCN1, GATA2, FES, FGL2, IRAK3, HFE, LY96, CD300LF, CLEC7A, TLR2, VSIG4, RHBDF2, IL18, CD14, CTSS, IL1R1, COCH, FLOT1, NFAM1, SH2B2, LYN, IL10, SRC, C5AR1, ACOD1, C3AR1, PTPN1, PLSCR1, TYROBP, FCER1G, T…
GOBP	GOBP_GRANULOCYTE_CHEMOTAXIS	3.17908e-10	2.31751e-08	0.814036	0.585482	2.37029	86	PPBP, CCL23, S100A12, S100A9, ADGRE2, S100A8, LGALS3, THBS1, NOD2, TNFAIP6, CXCL1, CCL2, CCL20, CD300H, CSF3R, CCL3, CXCL3, C5AR1, C3AR1, CCL8, FCER1G, PF4V1, PF4, C5AR2, CSF1R, CCL7, CMKLR1, CXCL6, ITGA9, IL1B, DPP4, SYK, CXCR1, TREM1, MOSPD2, ITGB2, PTK2, PPIA, CXCL8, MPP1, VAV3, MAPK3, JAML, EDN1
bioplanet	bioplanet_TGF-beta regulation of extracellular matrix	3.23667e-10	2.34553e-08	0.814036	0.397301	1.90723	369	CCR2, TFPI, LHFPL2, LCN2, STOM, LGALS3, ALOX5AP, MGST1, TNFAIP6, UGCG, DAPK1, QPCT, ITGAM, TNFRSF1A, CXCL1, FGL2, PCSK6, CTSC, CTSL, LY96, MTHFD2, FOSL1, NOL3, NAIP, LAMC1, NPTX2, CREG1, CASP1, ASAH1, FKBP1B, SERPINE1, JAG1, IL1R1, HGF, FN1, VCAN, G6PD, GPNMB, LPL, SDCBP, CCL8, SPRY1, MGST2, NPC2, CD36, CEBPD, RAB13, CKAP4, GNPDA1, RNASE1, ANG, VEGFA, CTH, AKR1C1, TGFBI, ADORA2B, TNFAIP2, SC5D, C…
GOBP	GOBP_INORGANIC_ION_TRANSMEMBRANE_TRANSPORT	3.49486e-10	2.51774e-08	0.814036	0.373097	1.82622	464	TRPM6, TRPM4, PTAFR, SLC47A1, TREM2, STOM, SLC31A1, SLC31A2, SLC11A1, SLC46A1, TMEM37, ATP6V0D2, SLC1A3, KCNK13, SLC39A4, SLC37A2, KCNMB1, HFE, ITGAV, P2RX1, NOL3, FKBP1B, RHAG, CCL3, LYN, KCNQ1, G6PD, SLC39A1, ATP6V1A, TCIRG1, SLC25A37, GEM, TPCN2, ATP6V0D1, COX6B1, VMP1, CLCN5, STAC3, ATP2A2, GPR35, SLC6A6, SLC6A9, YWHAE, GRIN2C, SLC24A3, PRKACA, ABCB8, ATP2C1, PCYOX1, ANXA2, SLC8A1, KCNK6, SLC…
GOBP	GOBP_PROGRAMMED_CELL_DEATH	3.62873e-10	2.59889e-08	0.814036	0.30282	1.54156	1333	CLU, ADM, JAG2, CX3CR1, S100A9, ENG, NIBAN2, RNF144B, PYGL, SOD2, HCK, VNN1, DRAM1, TNFAIP8L3, TNIP2, EMILIN2, TNFRSF8, TREM2, S100A8, STEAP3, HMOX1, LCN2, LGALS3, ZMAT3, ADAMTSL4, SPHK1, NRP1, VDR, PLAUR, THBS1, UBE2M, MERTK, CTSD, NOD2, HTRA1, CTSB, HK2, DAPK1, CASP4, TIMP1, PYCARD, ITGAM, CARD9, TNFRSF1A, TNFSF12, SPI1, GSDME, GRN, AIF1, GATA2, CCL2, MTCH2, SCIN, CTSC, CTSL, BCL3, ENO1, ITGAV,…
GOBP	GOBP_LIPID_LOCALIZATION	3.82159e-10	2.72111e-08	0.814036	0.421588	1.98552	285	CLU, ABCG4, PTGES, AQP9, TNFAIP8L3, TREM2, ABCC4, MSR1, THBS1, SCARB2, PSAP, UGCG, LDLR, RETN, LRP1, ITGAV, DAB2, B4GALNT1, TSPO, SOAT1, KCNQ1, ACSL1, TNFRSF11A, DGAT2, LPL, PLSCR1, ABCC3, NPC2, CD36, SLCO2B1, TPCN2, VMP1, NR1H3, IL1A, AKR1C1, PITPNA, RXRA, BMP6, APOL6, ABCA6, TTC39B, LPCAT3, ANXA2, DBI, MFSD2B, ATP11A, IL1B, ATP8B4, SURF4, FURIN, HEXB, PRELID1, STARD5, PTPN2, ABCC1, PLIN2, PRKCD…
GOBP	GOBP_CELLULAR_RESPONSE_TO_LIPID	3.86257e-10	2.73439e-08	0.814036	0.394342	1.89943	378	CLU, PPBP, CX3CR1, PTAFR, TFPI, HCK, TNIP2, TREM2, MGST1, SBNO2, VDR, NOD2, PYCARD, CD68, CXCL1, SPI1, LDLR, HES1, FES, PAQR7, CCL2, KCNMB1, LY96, DAB2, TLR2, CASP1, IL18, SERPINE1, CD14, TSPO, TRIB1, CCL3, CXCL3, LYN, CD180, IL10, SRC, ACOD1, DGAT2, LPL, PDCD1LG2, TNFRSF1B, TLR4, CD36, ITGA2, SCIMP, PF4V1, SASH1, PF4, ZNF703, LITAF, NR1H3, PLCB1, IL1A, AKR1C1, RXRA, BMP6, TRIM5, YES1, CXCL6, SGK…
GOBP	GOBP_METHYLATION	3.90987e-10	2.75196e-08	0.814036	-0.359645	-1.95592	285	METTL18, NFYA, TRMT12, GFI1, KANSL2, TRMT61A, PPM1D, MTO1, KANSL1, VIRMA, SIRT1, BTG1, BMT2, TDRD12, RAMAC, ZNF274, EHMT2, GSPT1, NSUN2, RIF1, SMYD5, PRDM10, GATA3, KDM4C, PIK3CA, PRDM15, NELFA, PCMTD2, SMAD4, EZH1, PAXBP1, KDM3A, MTA2, METTL14, PRDM4, SETD4, PHF1, CSKMT, CBLL1, N6AMT1, LCMT2, CHTOP, AUTS2, ZNF304, ATF7IP, SUZ12, PAF1, NSUN6, WDR82, METTL8, CMTR2, BTG2, SETD2, PCMTD1, PRDM11, SMY…
GOBP	GOBP_RESPONSE_TO_ENDOGENOUS_STIMULUS	4.90126e-10	3.43004e-08	0.801216	0.317925	1.6054	985	ADM, ZFHX3, CX3CR1, CD9, TRPM4, PTAFR, ENG, P2RY2, TFPI, HTR7, AQP9, CYFIP1, ITGB5, TREM2, HMOX1, GRB10, FCGR2B, RAB31, THBS1, SLC1A3, NOD2, HTRA1, FPR2, CTSB, ANXA3, TNFAIP6, UGCG, SPINT1, CASP4, TIMP1, CD68, SPI1, MMP19, LDLR, CLDN5, RETN, AIF1, HES1, ZYX, PAQR7, BAIAP2, CCL2, PCSK6, HFE, CTSL, LRP1, MTSS2, AGTRAP, FOSL1, LGMN, DAB2, TLR2, IDH1, RRAGC, NOTCH2, PRCP, CTSS, TSPO, SH2B2, SPRED1, C…
GOBP	GOBP_REGULATION_OF_LEUKOCYTE_DEGRANULATION	5.13253e-10	3.57148e-08	0.801216	0.739091	2.51651	37	PTAFR, CCR2, ADGRE2, FGR, HMOX1, FCGR2B, ITGAM, CD300A, SPI1, GATA2, FES, LYN, PRAM1, ADORA2B, GAB2, SYK, LAMP1, RABGEF1, STXBP2, ITGB2, CD177
GOBP	GOBP_LEUKOCYTE_MEDIATED_IMMUNITY	5.91201e-10	4.09064e-08	0.801216	0.423285	1.98866	276	CLU, BATF, CX3CR1, TRPM4, PTAFR, FCGR1A, CCR2, ADGRE2, FGR, TREM2, HMOX1, FCGR2B, NECTIN2, NOD2, ANXA3, ITGAM, CARD9, LILRB4, CD300A, SPI1, GATA2, FES, HFE, CTSC, BCL3, CLEC7A, IL18, JAG1, IL1R1, AZU1, CCL3, LYN, IL10, TYROBP, FCER1G, TCIRG1, TNFRSF1B, CSF2RB, TLR8, TLR4, SCIMP, C1QB, PRAM1, TREX1, ADORA2B, GAB2, C1QC, CLEC4G, CXCL6, IL1B, NLRP3, BCL6, FUT7, MYD88, ICAM1, TICAM1, PTGDS, PRKCD, C3…
bioplanet	bioplanet_Capped intron-containing pre-mRNA processing	5.96405e-10	4.10347e-08	0.801216	-0.484532	-2.38668	117	HNRNPU, HNRNPA0, RBM5, NUP107, CPSF7, NUP160, NUP43, SF3B4, SRSF6, CCAR1, SF3B1, SRSF2, HNRNPD, POLR2D, HNRNPUL1, CLP1, HNRNPK, NUDT21, RAE1, NUP54, SRSF5, DHX9, SNRPB2, PRPF4, CSTF1, DDX23, CSTF3, CD2BP2, NUP35, PAPOLA, NXF1, SRRM1, SF3A1, SF3B3, NFX1, RBM8A, HNRNPC, SNRNP70, DNAJC8, POLR2C, HNRNPM, NUP88, POLR2B, PRPF6, SNRPB, PHF5A, SNRNP40, SUGP1, NUP155, RANBP2, NUP62, NUP133, NUP210, UPF3B,…
GOBP	GOBP_POSITIVE_REGULATION_OF_DEFENSE_RESPONSE	6.12804e-10	4.19274e-08	0.801216	0.457599	2.08979	205	S100A12, S100A9, CCR2, HCK, EMILIN2, TREM2, S100A8, LILRA5, ALOX5AP, NECTIN2, STING1, OSM, NOD2, FPR2, PYCARD, CARD9, TNFRSF1A, SPI1, LDLR, GRN, FCN1, CTSC, CLEC7A, TLR2, CASP1, IL18, SERPINE1, COCH, CCL3, LYN, SRC, TNFRSF11A, LPL, PLSCR1, MGST2, TYROBP, TLR8, TLR4, NLRC4, ITGA2, CEBPA, ADORA2B, TRIM5, CEBPB, CASP6, APP, IL1B, CYBA, LILRA2, IDO1, NLRP12, GPRC5B, ABCC1, C3, PAK1, PLA2G7, ADAM8, CA…
REACTOME	REACTOME_DEGRADATION_OF_THE_EXTRACELLULAR_MATRIX	6.17906e-10	4.20416e-08	0.801216	0.634406	2.41667	61	CTSD, HTRA1, CTSB, COL9A2, TIMP1, MMP1, MMP19, CTSL, LAMC1, CTSS, FN1, MMP9, MMP25, CAPN3, ADAM15, FURIN, ADAM9, CAPN1, ADAM8, MMP2, SPP1, NCSTN, ADAM17, PSEN1, COL10A1, LAMB3, CD44, CAST, CAPN2
bioplanet	bioplanet_Interleukin-1 regulation of extracellular matrix	6.51896e-10	4.41092e-08	0.801216	0.592262	2.36561	81	PTGES, SOD2, TNFAIP6, MMP1, CXCL1, ALDH1A1, CCL2, SCIN, CCL20, FOSL1, DUSP6, LIF, CXCL3, IL1RN, CCL8, HBEGF, PLXDC2, PTX3, COMP, IL1A, TNFAIP2, CCL7, MT2A, CXCL6, IL1B, IL15RA, ICAM1, C3, RHOB, LCP1, FABP5, CFH, IL1R2, IL6, SPP1, TNF, ALDH3A2, CXCL8, HSD11B1, TXNRD1, SERPINB2, PTGS2
GOBP	GOBP_RESPONSE_TO_NITROGEN_COMPOUND	7.31162e-10	4.92008e-08	0.801216	0.3375	1.68747	737	ADM, CD9, TRPM4, PTAFR, P2RY2, HTR7, AQP9, CYFIP1, TREM2, GRB10, GUCY1B1, FCGR2B, RAB31, STING1, SLC1A3, NOD2, FPR2, CASP4, TIMP1, CARD9, CD68, MMP19, LDLR, RETN, AIF1, HES1, BAIAP2, IRAK3, LRP1, AGTRAP, P2RX1, FOSL1, LGMN, TLR2, RRAGC, PRKAR2B, JAG1, TSPO, FLOT1, SH2B2, CYBB, PTPRE, LYN, THBD, IL10, KCNQ1, SRC, C5AR1, LPL, MMP9, PTPN1, PRKCI, FCER1G, BRSK2, P2RY12, TLR4, CD36, NCCRP1, PXN, SOCS2…
GOBP	GOBP_NEGATIVE_REGULATION_OF_TRANSPORT	7.68093e-10	5.14034e-08	0.801216	0.425102	1.99681	273	NRG1, CCR2, DYSF, CYFIP1, HMOX1, LGALS3, GRB10, FCGR2B, THBS1, OSM, MCTP1, TNFRSF1A, CD300A, SPI1, HES1, CD300LF, ITGAV, TLR2, RHBDF2, FKBP1B, LIF, TIFAB, MMP9, SDCBP, PLSCR1, FRMD4A, TNFRSF1B, CD36, SLC43A2, GEM, NR1H3, GPR35, SLC6A9, OAZ1, YWHAE, ANXA2, RAB11FIP5, APP, EPHB2, PID1, IL1B, P2RY1, CBARP, PIM3, FFAR4, GSTO1, NOTCH1, FER1L5, CALM3, SESTD1, ATG3, FABP5, KLF7, TMBIM6, RAB11FIP1, SNX33…
GOBP	GOBP_VASCULAR_PROCESS_IN_CIRCULATORY_SYSTEM	8.97803e-10	5.97576e-08	0.801216	0.505458	2.22122	149	ADM, TRPM4, P2RY2, SOD2, HTR7, TBXAS1, ABCC4, SLC1A3, DOCK4, CLDN5, KCNMB1, LRP1, P2RX1, GUCY1A1, TEK, DOCK5, AZU1, SRC, ABCC3, CD36, SLCO2B1, VEGFA, COMP, SLC6A6, ADORA2B, SLC6A9, BMP6, YES1, SLC24A3, SLC8A1, SLC7A8, P2RY1, PLOD3, ADRB2, HRH2, ABCC1, PLEC, SLC1A2, FABP5, SCPEP1, MMP2, GPX1, ITGB1BP1, ARHGAP42, TNF, RGS2, RAMP2, INSR, SLC1A5, APOE, PLVAP, PTPRJ, SLCO3A1, PTGS2, MFSD2A, EDN1, SLC2…
WP	WP_MRNA_PROCESSING	9.69992e-10	6.42135e-08	0.788187	-0.488759	-2.3838	112	PSKH1, CSTF2T, HNRNPU, RBM5, CLK4, SF3B4, SPOP, SRSF6, SF3B1, SRSF2, DDX20, CLK3, HNRNPD, CLP1, HNRNPK, NUDT21, SRSF5, DHX9, SNRPB2, PRPF4, CSTF1, SNU13, CSTF3, CD2BP2, PTBP2, PAPOLA, NXF1, SFPQ, DHX8, SRRM1, SF3A1, SF3B3, CELF1, SNRPN, HNRNPC, SNRNP70, PRPF18, DNAJC8, HNRNPM, CLK1, RBM39, PRPF6, SNRPB, PHF5A, TRA2B, SNRNP40, SUGP1, DDX1, TMED10, SRSF10, DHX16, RNGTT, CPSF4, CLK2
KEGG	KEGG_COMPLEMENT_AND_COAGULATION_CASCADES	1.00737e-09	6.59746e-08	0.788187	0.740433	2.48136	34	TFPI, F13A1, VWF, SERPINA1, PLAU, PLAUR, SERPINE1, THBD, C5AR1, C3AR1, C1QB, C1QC, CFD, F3, C3, CFH, PROS1, SERPING1
bioplanet	bioplanet_Complement and coagulation cascades	1.00737e-09	6.59746e-08	0.788187	0.740433	2.48136	34	TFPI, F13A1, VWF, SERPINA1, PLAU, PLAUR, SERPINE1, THBD, C5AR1, C3AR1, C1QB, C1QC, CFD, F3, C3, CFH, PROS1, SERPING1
HALLMARK	HALLMARK_IL2_STAT5_SIGNALING	1.0277e-09	6.69482e-08	0.788187	0.478773	2.13986	170	BATF, WLS, SELP, CYFIP1, TNFRSF8, GUCY1B1, NRP1, HK2, ALCAM, SMPDL3A, FGL2, ITGAV, LIF, NFIL3, COCH, PTGER2, IL10, PHLDA1, PLSCR1, TNFRSF1B, ECM1, CAPG, SOCS2, CKAP4, TNFRSF21, MAP3K8, TTC39B, BHLHE40, CDKN1C, IFNGR1, CAPN3, GSTO1, CISH, FURIN, BATF3, PLIN2, RHOB, BCL2L1, PLEC, ADAM19, SYNGR2, MAPKAPK2, CTSZ, IL1R2, GLIPR2, SPP1, ANXA4, DCPS, CD86, MXD1, DENND5A, SYT11, SLC1A5, AHNAK, ST3GAL4, TG…
bioplanet	bioplanet_Transmembrane transport of small molecules	1.06476e-09	6.89956e-08	0.788187	0.426103	1.98954	258	ABCG4, AQP3, AQP9, SLC47A1, ABCC4, STEAP3, HK3, HMOX1, SLC31A1, SLC11A1, SLC46A1, ATP6V0D2, SLC1A3, SLC7A7, HK2, CYBRD1, SLC39A4, GNB4, SLC22A4, SLC22A15, PRKAR2B, RHAG, SLC39A1, ATP6V1A, TCIRG1, ABCC3, SLC43A2, SLCO2B1, SLC16A3, SLC2A6, ATP6V0D1, SLC2A5, ATP2A2, SLC6A6, SLCO4A1, SLC6A9, ABCA6, SLC24A3, PRKACA, ABCB8, ATP2C1, ATP6V0A1, SLC8A1, GNG11, SLC7A8, ATP11A, SLC15A3, SLC8B1, FTL, ADCY4, A…
GOBP	GOBP_POSITIVE_REGULATION_OF_INTERLEUKIN_1_BETA_PRODUCTION	1.14628e-09	7.38867e-08	0.788187	0.667616	2.44243	49	MEFV, LILRA5, NOD2, PYCARD, STMP1, CLEC7A, CASP1, AZU1, CCL3, LPL, TYROBP, TLR8, TLR4, CD36, NLRC4, TLR6, GSDMD, APP, NLRP3, LILRA2, TMEM106A, NLRP12, MYD88, IL6, TNF, HK1, AIM2, IFI16, STAT3
GOBP	GOBP_CHROMATIN_ASSEMBLY_OR_DISASSEMBLY	1.22741e-09	7.87019e-08	0.788187	-0.446694	-2.25475	144	BRD2, TLK1, SMARCA5, TSPYL2, NAP1L2, TSPYL1, PPM1D, SIRT1, RESF1, TLK2, HJURP, KAT6A, RIF1, SPTY2D1, PIK3CA, TASOR, ASIP, EZH1, MTA2, AXIN1, TSPYL4, CHRAC1, GRWD1, MORC2, ATF7IP2, SMARCD1, NPM1, ASF1A, HDAC1, ZNF304, ATF7IP, PAF1, ARID2, SART3, TP53, RRP8, KAT6B, SUV39H2, NAP1L5, CABIN1, LMNTD2, CENPP, SMCHD1, CDAN1, SMARCE1, POLE3, DNAJC9, CTCF, UBN2, TSPYL5, SUV39H1, SHPRH, SETDB2, BAHD1, FAM17…
GOBP	GOBP_DETECTION_OF_EXTERNAL_BIOTIC_STIMULUS	1.31604e-09	8.39457e-08	0.788187	0.908503	2.46119	13	TREM2, NOD2, LY96, CLEC7A, NAIP, TLR2, TLR4, NLRC4, TLR6, TLR1
GOBP	GOBP_CELLULAR_LIPID_METABOLIC_PROCESS	1.3381e-09	8.49105e-08	0.788187	0.342427	1.7083	664	ALOX5, PTGES, ALDH3B1, TNFAIP8L3, TBXAS1, PLBD1, SPTSSA, ALOX5AP, SPHK1, PSAP, UGCG, SMPDL3A, TNFRSF1A, ALDH1A1, DAGLB, LDLR, PLD1, PGAP1, SLC22A4, DHRS7, LRP1, HACD4, CYP3A5, P2RX1, IDH1, SPTLC2, PRKAR2B, ASAH1, B4GALNT1, AOAH, PCYT1A, B4GALT5, FUCA1, SOAT1, ACSL1, DAGLA, PLA2G15, DGAT2, LPL, PLSCR1, MGST2, SERINC5, NPC2, GK5, CD36, SOCS2, LPCAT2, ANG, NR1H3, PLCB1, DHRS9, TREX1, CSF1R, AKR1C1, …
GOBP	GOBP_REGULATION_OF_CELL_DEATH	1.35543e-09	8.55665e-08	0.788187	0.309874	1.56621	1082	CLU, ADM, CX3CR1, S100A9, ENG, NIBAN2, RNF144B, SOD2, HCK, VNN1, TNFAIP8L3, TNIP2, EMILIN2, TNFRSF8, TREM2, S100A8, HMOX1, LGALS3, ADAMTSL4, FCGR2B, SPHK1, NRP1, VDR, PLAUR, THBS1, UBE2M, MERTK, CTSD, NOD2, HTRA1, CTSB, DAPK1, CASP4, TIMP1, PYCARD, ITGAM, CARD9, TNFRSF1A, TNFSF12, GSDME, GRN, AIF1, GATA2, CCL2, MTCH2, SCIN, CTSC, LRP1, BCL3, ENO1, ITGAV, FOSL1, CLEC7A, LGMN, NOL3, DUSP6, NAIP, DA…
REACTOME	REACTOME_REGULATION_OF_TLR_BY_ENDOGENOUS_LIGAND	1.40983e-09	8.85446e-08	0.788187	0.908207	2.46039	13	S100A9, S100A8, GSDME, LY96, TLR2, CD14, TLR4, CD36, TLR6, TLR1, GSDMD
GOBP	GOBP_INTERLEUKIN_6_PRODUCTION	1.48697e-09	9.29127e-08	0.788187	0.529586	2.24241	116	PTAFR, TREM2, LILRA5, NOD2, PYCARD, CARD9, LILRB4, AIF1, IL1RAP, IRAK3, CLEC7A, TLR2, HGF, IL10, LPL, TYROBP, TLR8, TLR4, CD36, SCIMP, TLR6, C5AR2, IL1A, ADORA2B, TLR1, ARRB1, CEBPB, APP, IL1B, CYBA, LILRA2, TMEM106A, NLRP12, MYD88, GAS6, TICAM1, SYK, MAPKAPK2, IL6, TNF, GBA, RABGEF1, EREG, SYT11, PTPN6, STAT3, AKIRIN2, CAPN2, RIPK2, ARRB2, DDX58, HAVCR2, POU2F2, NCKAP1L, HSPD1, RAB7B
GOBP	GOBP_INTERLEUKIN_1_PRODUCTION	1.60139e-09	9.95541e-08	0.788187	0.586283	2.34173	81	CX3CR1, TREM2, MEFV, LILRA5, SPHK1, SERPINB1, NOD2, PYCARD, LILRB4, STMP1, CLEC7A, CASP1, AZU1, CCL3, IL10, LPL, TYROBP, TLR8, TLR4, CD36, NLRC4, TLR6, GSDMD, APP, GSTP1, NLRP3, LILRA2, FFAR4, TMEM106A, NLRP12, MYD88, GAS6, IL1R2, IL6, TNF, ARG2, HK1, AIM2, IFI16, STAT3
GOBP	GOBP_IMPORT_INTO_CELL	1.6562e-09	1.02022e-07	0.788187	0.505889	2.17997	131	TRPM4, SLC47A1, TREM2, SLC46A1, THBS1, SLC1A3, CYBRD1, SLC39A4, SLC22A4, HFE, P2RX1, FLOT1, KCNQ1, ACSL1, CD36, SLC43A2, SLC2A5, SLC6A6, SLC6A9, SLC36A4, GFAP, SLC8A1, SLC7A8, SLC15A3, STEAP4, ATP1B3, SLC1A2, TRPM2, FOLR2, KCNJ2, SLC18A2, TNF, RGS2, NEURL1B, PSEN1, SLC30A1, SLC1A5, SLC12A9, ATP1A1, AKT1, SLC7A11, ACTB, SLC36A1, SLC27A4, KCNK5, SLC9A1, CLN8, ACSL5, SLC7A5, ITGB1, WNK3, PARK7, SLC1…
GOBP	GOBP_REGULATION_OF_MULTICELLULAR_ORGANISMAL_DEVELOPMENT	1.65775e-09	1.02022e-07	0.788187	0.321419	1.61493	835	ADM, ALOX5, CX3CR1, TRPM4, ENG, NIBAN2, CCR2, AQP3, GLUL, VNN1, CYFIP1, EMILIN2, TREM2, STAB1, HMOX1, LGALS3, FCGR2B, SPHK1, NRP1, TMEM176B, VDR, THBS1, ANXA3, TNFAIP6, HK2, HLX, SPINT1, TNFRSF1A, LILRB4, TNFSF12, SPI1, LDLR, CLDN5, GRN, RETN, VCL, MAPK11, HES1, GATA2, FES, FGL2, IL1RAP, BAIAP2, SCIN, CTSC, DUSP6, TLR2, PLXNB2, NOTCH2, CSF3R, IL18, SERPINE1, LIF, JAG1, TEK, TSPO, TRIB1, MAFG, HGF…
GOBP	GOBP_DNA_REPLICATION	1.68433e-09	1.0314e-07	0.788187	-0.369115	-1.97961	246	OBI1, BRPF3, ID3, SMARCA5, TSPYL2, REPIN1, ACTR8, JADE2, CHTF18, JADE1, SENP2, ORC4, LPIN1, WAPL, RPA2, TERF2, EHMT2, MRE11, KAT7, WRNIP1, BLM, EME1, RFC5, NFRKB, ETAA1, CDC7, FANCM, GINS3, STN1, PCNA, CHRAC1, GRWD1, SMARCAL1, DHX9, SDE2, TERF1, ZNF830, DDX23, RFWD3, PDS5A, ZGRF1, ZBTB38, RRM1, JADE3, ATF1, POLK, TP53, SLX4, PRIMPOL, CIZ1, DBF4, UPF1, ORC6, REV1, ACTR5, CDAN1, POLE3, POLD1, DNAJA…
GOBP	GOBP_POSITIVE_REGULATION_OF_INFLAMMATORY_RESPONSE	1.84076e-09	1.12158e-07	0.788187	0.55165	2.28305	99	S100A12, S100A9, CCR2, TREM2, S100A8, LILRA5, ALOX5AP, OSM, PYCARD, TNFRSF1A, LDLR, GRN, CTSC, TLR2, CASP1, IL18, SERPINE1, CCL3, TNFRSF11A, LPL, MGST2, TLR4, ITGA2, CEBPA, ADORA2B, CEBPB, APP, IL1B, IDO1, NLRP12, GPRC5B, ABCC1, C3, PLA2G7, ADAM8, TTBK1, IL6, TNF, IFI35
GOBP	GOBP_POSITIVE_REGULATION_OF_DEVELOPMENTAL_PROCESS	1.90512e-09	1.15505e-07	0.774939	0.331492	1.66162	804	ADM, ALOX5, NRG1, CX3CR1, TRPM4, ENG, NIBAN2, SOD2, VNN1, CYFIP1, EMILIN2, TREM2, HMOX1, LGALS3, SPHK1, NRP1, VDR, MSR1, THBS1, ANXA3, HK2, HLX, SPINT1, TNFRSF1A, LILRB4, TNFSF12, CLDN5, GRN, RETN, MAPK11, HES1, GATA2, FES, IL1RAP, BAIAP2, MTCH2, SCIN, CLEC7A, DAB2, TLR2, METRNL, PLXNB2, NOTCH2, IL18, FKBP1B, SERPINE1, LIF, JAG1, TEK, DOCK5, TSPO, TRIB1, FLOT1, HGF, FN1, B4GALT5, CYBB, LYN, IL10,…
HALLMARK	HALLMARK_IL6_JAK_STAT3_SIGNALING	1.94503e-09	1.17344e-07	0.774939	0.620845	2.40042	66	CD9, HMOX1, TNFRSF1A, CXCL1, IFNGR2, TLR2, CSF3R, CD14, LTBR, IL1R1, CXCL3, PTPN1, TNFRSF1B, CSF2RB, CD36, CCR1, TNFRSF21, PF4, CCL7, MAP3K8, IL13RA1, IFNGR1, IL1B, IL15RA, MYD88, PTPN2, IL1R2, IL6, TNF
GOBP	GOBP_CARBOHYDRATE_DERIVATIVE_METABOLIC_PROCESS	1.96731e-09	1.18106e-07	0.774939	0.337448	1.68788	708	UPP1, PYGL, TREM2, HK3, DPYD, GUCY1B1, TNFAIP6, HK2, UGCG, PAPSS2, ALDH1A1, IMPDH1, PGAP1, PCSK6, CTSL, ENO1, AP2A1, PLOD1, GUCY1A1, CHST15, B4GALNT1, AOAH, B4GALT5, FUCA1, SOAT1, ACSL1, G6PD, ATP6V1A, DGAT2, RENBP, PHLDA1, PGD, HBEGF, GALK1, GK5, NCCRP1, NUDT1, APOBEC3A, GNPDA1, SLC2A6, PTX3, NPL, PLCB1, UAP1L1, TREX1, PFKFB3, AKR1C1, GNS, ACSS2, ELOVL7, HIF1A, TCF7L2, AK4, MANBA, LDHA, PFKFB4, …
PID	PID_UPA_UPAR_PATHWAY	2.01557e-09	1.19828e-07	0.774939	0.767864	2.47083	28	ITGB5, FPR3, FPR1, PLAU, PLAUR, FPR2, ITGAM, LRP1, ITGAV, SERPINE1, HGF, FN1, SRC, MMP9
bioplanet	bioplanet_Urokinase-type plasminogen activator (uPA) and uPAR-mediated signaling	2.01557e-09	1.19828e-07	0.774939	0.767864	2.47083	28	ITGB5, FPR3, FPR1, PLAU, PLAUR, FPR2, ITGAM, LRP1, ITGAV, SERPINE1, HGF, FN1, SRC, MMP9
bioplanet	bioplanet_Interleukin-5 regulation of apoptosis	2.02997e-09	1.20102e-07	0.774939	0.524802	2.22552	117	UPP1, PTAFR, P2RY2, SOD2, SELP, ANXA3, HLX, CASP4, CXCL1, ZYX, CCL2, ENO1, DUSP6, NFIL3, FUCA1, CCL3, HBEGF, TLR4, CCR1, TLR6, IL1A, MT1X, TLR1, TPM4, HIF1A, YES1, CXCL6, SGK1, IER3, IL1B, QSOX1, IDO1, MYD88, ICAM1, MKNK1, C3, IL6, NFE2L2, TFPI2, HEXA, RGS2, FOSL2, LIMK2, ITGB2, EGR2, CXCL8, SRI, CLEC2B, PTGS2, MAPK3, CD44, IL21R, IL2RA
GOBP	GOBP_ACUTE_INFLAMMATORY_RESPONSE	2.13924e-09	1.25958e-07	0.774939	0.632825	2.40344	58	PTGES, FCGR1A, VNN1, SERPINA1, S100A8, ALOX5AP, FCGR2B, OSM, CD163, PRCP, FN1, TNFRSF11A, PLSCR1, IL1A, CEBPB, F3, GSTP1, IL1B, NLRP3, FUT7, C3, ADAM8, IL6, IL22, TNF, TREM1, ACVR1, BTK, ANO6, PTGS2, RHBDD3
GOBP	GOBP_VASCULATURE_DEVELOPMENT	2.26855e-09	1.32933e-07	0.774939	0.367416	1.79829	462	ADM, ALOX5, CX3CR1, ENG, NIBAN2, CCR2, GLUL, SOD2, EMILIN2, STAB1, HMOX1, SPHK1, NRP1, EGFL7, THBS1, ANXA3, HK2, SPINT1, TNFSF12, SPI1, MMP19, LDLR, CLDN5, GRN, HES1, GATA2, CCL2, LRP1, ITGAV, ANPEP, FOSL1, NOTCH2, IL18, SERPINE1, LIF, PRCP, JAG1, TEK, HGF, FN1, SPRED1, CYBB, IL10, GPNMB, C5AR1, C3AR1, CCL8, ITGA2B, ECM1, SASH1, PF4, ANG, SEMA4A, VEGFA, CTH, COMP, MYLK, IL1A, TREX1, LGALS8, TGFBI…
REACTOME	REACTOME_CLASS_A_1_RHODOPSIN_LIKE_RECEPTORS	2.30692e-09	1.34538e-07	0.774939	0.505928	2.18257	133	PPBP, CCL23, CX3CR1, PTAFR, CCR2, P2RY2, HTR7, FPR3, FPR1, FPR2, PSAP, CXCL1, CCL2, CCL20, CXCL16, CCL3, CXCL3, PTGER2, C5AR1, C3AR1, P2RY13, P2RY12, CCR1, PF4, C5AR2, OXER1, GPR35, ADORA2B, CCL7, CMKLR1, CXCL6, HEBP1, APP, CCRL2, P2RY1, FFAR4, PLPPR2, ADRB2, HRH2, PTGIR, C3, NLN, CXCR1, P2RY6, LTB4R, CCR5, CXCL8, CYSLTR2, SUCNR1, F2RL2
REACTOME	REACTOME_SIGNALING_BY_GPCR	2.39587e-09	1.39062e-07	0.774939	0.390854	1.86992	348	PPBP, CCL23, ADM, CX3CR1, PTAFR, CCR2, P2RY2, ADGRE2, HTR7, FPR3, FPR1, RGS18, FPR2, ADGRE1, PSAP, CXCL1, DAGLB, GNB4, CCL2, CCL20, CXCL16, PRKAR2B, GPR27, CAMKK2, CCL3, CXCL3, PTGER2, DAGLA, SRC, C5AR1, C3AR1, P2RY13, HBEGF, P2RY12, ITSN1, CCR1, PF4, GNAQ, C5AR2, PLCB1, OXER1, GPR35, ADORA2B, RGS17, CCL7, CMKLR1, GPR84, CXCL6, PRKACA, RGS19, ARRB1, HEBP1, APP, CCRL2, GNG11, ADCY4, P2RY1, GNA15, …
KEGG	KEGG_ALZHEIMERS_DISEASE	3.46519e-09	2.0018e-07	0.774939	0.517394	2.20581	120	NDUFS8, TNFRSF1A, LRP1, LPL, COX6B1, GNAQ, PLCB1, ATP2A2, GRIN2C, BACE2, APP, IL1B, GAPDH, APAF1, CAPN1, CALM3, PSENEN, NCSTN, NDUFV2, TNF, ADAM17, NDUFB7, CDK5, COX4I1, PSEN1, NDUFB2, CASP7, NDUFS6, ATP5F1E, ATP5F1D, NDUFA8, PLCB2, APOE, ATF6, NDUFS3, UQCRH, SDHC, MAPK3, CALML6, CAPN2, PLCB3, BAD, COX5A, BID, NDUFV1, NDUFB3, NDUFB8, ATP5PO, COX8A, NDUFA9, NDUFS7, BACE1, ATP5F1B, CASP9, ATP5PB, P…
GOBP	GOBP_MONOCARBOXYLIC_ACID_METABOLIC_PROCESS	3.50176e-09	2.01343e-07	0.774939	0.38662	1.85675	373	ALOX5, PTGES, VNN1, TBXAS1, HK3, ALOX5AP, SLC1A3, HK2, TNFRSF1A, CYP39A1, ALDH1A1, DAGLB, ENO1, HACD4, CYP3A5, IDH1, PRKAR2B, ASAH1, HAL, GATM, AOAH, ACSL1, DAGLA, PLA2G15, DGAT2, LPL, PGD, GALK1, CD36, SLC2A6, NR1H3, DHRS9, TREX1, AKR1C1, CBR1, ACSS2, KYNU, ELOVL7, HIF1A, ACAD10, IVD, LDHA, ALOX12, LYPLA2, VNN2, DBI, APP, GSTP1, IL1B, CYP1B1, GAPDH, IDO1, MTHFD1L, ACOT8, THEM4, PTGDS, C3, PAM, A…
REACTOME	REACTOME_SIGNALING_BY_RECEPTOR_TYROSINE_KINASES	3.76923e-09	2.15709e-07	0.761461	0.387229	1.86742	383	NRG1, CYFIP1, GRB10, NCF2, SPHK1, NRP1, THBS1, ATP6V0D2, PTPN18, SPINT1, COL9A2, MAPK11, FES, BAIAP2, PCSK6, AP2A1, ITGAV, FOSL1, DUSP6, LAMC1, NCF4, TRIB1, HGF, FN1, SH2B2, SPRED1, CYBB, LYN, ATP6V1A, SRC, MMP9, PTPN1, SPRY1, TCIRG1, HBEGF, DNM1, PXN, ITGA2, ATP6V0D1, VEGFA, TNS3, GAB2, HIF1A, YES1, SGK1, PRKACA, CTNNA1, GFAP, F3, NCF1, SPARC, ATP6V0A1, CYBA, DOCK7, ADAP1, BRK1, MAPKAPK3, FURIN,…
REACTOME	REACTOME_ANTIGEN_PROCESSING_CROSS_PRESENTATION	3.9069e-09	2.22548e-07	0.761461	0.560537	2.29218	88	S100A9, FCGR1A, ITGB5, S100A8, NCF2, CTSL, LY96, ITGAV, TLR2, CD14, NCF4, CTSS, CYBB, TLR4, CD36, TLR6, TLR1, MRC2, NCF1, MRC1, CYBA, MYD88, PSMD13, PSMB3, PSMB5, PSMB6, PSME2, PSMD1, BTK, PSMB9, SEM1, CALR, SEC61B, PSMD2, SEC61A1, PSMC1, PSMB7, PSME4, PSMB2, VAMP3, PSMD14, PSMB10, IKBKG, PSMB4, PSMA5, PDIA3, PSMB8, PSMA4, PSMD4
HALLMARK	HALLMARK_KRAS_SIGNALING_UP	4.00071e-09	2.26837e-07	0.761461	0.494653	2.16151	141	PPBP, ENG, TFPI, F13A1, ADAMDEC1, PLAU, NRP1, TMEM176B, PLAUR, ATG10, RETN, CCL20, LY96, DUSP6, MPZL2, G0S2, GUCY1A1, LIF, CTSS, TRIB1, TMEM158, FUCA1, GPNMB, C3AR1, MMP9, PDCD1LG2, MAFB, FCER1G, TNFRSF1B, HBEGF, TLR8, ITGA2, EVI5, KLF4, CLEC4A, CMKLR1, EPB41L3, EPHB2, GNG11, IL1B, ZNF277, ERO1A, GPRC5B, ADAM8, SCN1B, LCP1, GADD45G, CFH, SPRY2, SPP1, ADAM17, PRDM1, GLRX, ITGB2, EREG, LAT2, HSD11B…
GOBP	GOBP_ANTIMICROBIAL_HUMORAL_IMMUNE_RESPONSE_MEDIATED_BY_ANTIMICROBIAL_PEPTIDE	4.17136e-09	2.35423e-07	0.761461	0.793612	2.48883	24	PPBP, S100A12, S100A9, NOD2, CXCL1, RNASE6, CXCL3, PF4V1, PF4, ANG, CXCL6, GAPDH, CAMP, CXCL14, CXCL8
REACTOME	REACTOME_INTERLEUKIN_4_AND_INTERLEUKIN_13_SIGNALING	4.33177e-09	2.43354e-07	0.761461	0.567103	2.29589	86	BATF, ALOX5, F13A1, HMOX1, LCN2, MAOA, OSM, TIMP1, MMP1, ITGAM, CCL2, RHOU, IL18, LIF, HGF, FN1, IL10, MMP9, TNFRSF1B, CD36, CEBPD, VEGFA, IL1A, HIF1A, IL13RA1, IL1B, BCL6, CDKN1A, VIM, ICAM1, BCL2L1, MMP2, IL6, ITGAX, TNF, ITGB2, CXCL8, STAT3
GOBP	GOBP_GRANULOCYTE_ACTIVATION	4.67361e-09	2.6136e-07	0.761461	0.686997	2.41558	41	PTAFR, CCR2, FCGR2B, ANXA3, ITGAM, CD300A, SPI1, GRN, IL18, CCL3, TYROBP, FCER1G, PRAM1, CXCL6, LILRA2, MYD88, PRKCD, CAMP, SYK, TNF, STXBP2, ITGB2, CD177, CXCL8
bioplanet	bioplanet_Interleukin-4 regulation of apoptosis	4.78439e-09	2.66338e-07	0.761461	0.454913	2.05293	189	CCL23, UPP1, ALOX5, CD9, TFPI, F13A1, MS4A4A, ALOX5AP, VDR, MAOA, ITGAM, SLC22A4, FGL2, CCL2, CCL20, CTSC, CTSL, S100P, DUSP6, TLR2, IL18, JAG1, NFIL3, FN1, VCAN, PTGER2, IL10, LPL, IL1RN, FCER1G, CPM, CSF2RB, TLR4, ITGA2, GEM, LITAF, PTX3, CEBPB, F3, IL13RA1, MTHFR, BCL6, CYP1B1, CDKN1A, GAS6, TNS1, CCPG1, IL6, SPP1, ARID5B, TNF, RGS2, CLTB, MX1, IFI16, LTB4R, TPK1, LRRTM2, CD86, MXD1, CXCL8, CY…
HALLMARK	HALLMARK_XENOBIOTIC_METABOLISM	4.86829e-09	2.69782e-07	0.761461	0.496913	2.16525	140	UPP1, PTGES, AQP9, VNN1, HMOX1, TMEM176B, MAOA, PAPSS2, TNFRSF1A, DHRS7, IGFBP4, BLVRB, IDH1, SERPINE1, IL1R1, PGD, ABCC3, CD36, ATP2A2, CBR1, SLC6A6, KYNU, MT2A, CASP6, ETS2, CDA, GSTO1, PGRMC1, PTGDS, TMBIM6, PTS, ARG2, PROS1, NDRG2, PDK4, SLC1A5, POR, CSAD, HSD11B1, CYP2J2, APOE, UGDH, DHRS1, GSR, DDAH2, SSR3, ACOX2, BPHL, ABCC2, CAT, NPC1, MAN1A1, CYP27A1, PYCR1, MTHFD1, ACP2, PDLIM5, GCNT2, …
GOBP	GOBP_RIBOSOME_BIOGENESIS	5.42646e-09	2.99359e-07	0.761461	-0.355215	-1.92751	268	RIOK2, METTL18, SBDS, NIP7, RSL1D1, ABT1, SURF6, WBP11, MAK16, ERI1, URB1, LAS1L, TSC1, DDX10, EIF4A3, DHX30, DDX28, SHQ1, HELQ, BRIX1, NGRN, TSR2, UTP14C, RPP38, ABCE1, NOL11, UTP4, MTERF4, URB2, ISG20L2, NPM1, YTHDF2, IMP3, ERI2, DROSHA, GTF3A, SNU13, DDX3X, EXOSC9, FASTKD2, ZNF622, EXOSC4, CUL4B, UTP18, ZNHIT3, NGDN, RRP8, RPL7L1, RSL24D1, BMS1, REXO4, UTP15, XPO1, NAT10, TSR1, EXOSC8, LTO1, P…
GOBP	GOBP_POSITIVE_REGULATION_OF_REACTIVE_OXYGEN_SPECIES_METABOLIC_PROCESS	5.51522e-09	3.02892e-07	0.761461	0.641039	2.34749	51	SOD2, THBS1, FPR2, ITGAM, CLEC7A, TSPO, ACOD1, TYROBP, TLR4, CD36, TLR6, AKR1C1, CBR1, PID1, GSTP1, CYBA, CYP1B1, CDKN1A, PRKCD, RAB27A, SYK, NFE2L2, ITGB2, CD177
GOBP	GOBP_CALCIUM_ION_TRANSPORT	5.67149e-09	3.0734e-07	0.761461	0.419267	1.95852	251	TRPM6, TRPM4, LGALS3, LILRA5, VDR, TMEM37, HES1, CCL2, ITGAV, P2RX1, NOL3, FKBP1B, TSPO, CCL3, LYN, G6PD, CCL8, CCR1, GEM, TPCN2, VMP1, STAC3, MYLK, ATP2A2, GPR35, WFS1, YWHAE, GRIN2C, SLC24A3, PRKACA, ATP2C1, ANXA2, SLC8A1, CDH23, GP1BA, SLC8B1, CYBA, CBARP, CAPN3, LILRA2, GSTO1, GP9, ERO1A, BEST1, GAS6, EHD3, TMEM38B, CALM3, SESTD1, TRPM2, TMBIM6, HTT, CHD7, JSRP1, RAMP2, CDK5, PSEN1, MCOLN1, C…
GOBP	GOBP_DNA_PACKAGING	5.63984e-09	3.0734e-07	0.761461	-0.425462	-2.15663	154	BRD2, SMARCA5, TSPYL2, NAP1L2, TSPYL1, PPM1D, SIRT1, RESF1, WAPL, HJURP, KAT6A, RIF1, SPTY2D1, PIK3CA, TASOR, ASIP, EZH1, AXIN1, TSPYL4, CHRAC1, GRWD1, MORC2, ATF7IP2, NPM1, ASF1A, HDAC1, ZNF304, ATF7IP, PAF1, SART3, AKAP8L, TP53, RRP8, KAT6B, AKAP8, NAP1L5, CABIN1, LMNTD2, CENPP, SMCHD1, CDAN1, POLE3, DNAJC9, CTCF, PIWIL1, KMT5A, UBN2, TSPYL5, SUV39H1, SHPRH, SETDB2, BAHD1, FAM172A, PHF2, MIS18A…
GOBP	GOBP_REGULATION_OF_DNA_REPLICATION	5.65981e-09	3.0734e-07	0.761461	-0.468407	-2.29436	113	OBI1, BRPF3, ID3, SMARCA5, TSPYL2, ACTR8, JADE2, CHTF18, JADE1, SENP2, LPIN1, WAPL, EHMT2, KAT7, WRNIP1, BLM, RFC5, NFRKB, CDC7, GINS3, STN1, PCNA, CHRAC1, SMARCAL1, DHX9, TERF1, ZNF830, PDS5A, ZBTB38, JADE3, ATF1, TP53, CIZ1, DBF4, ACTR5, CDAN1, POLE3, ORC5, RBBP6, HCRT, FBH1, RAD17
WP	WP_COMPLEMENT_AND_COAGULATION_CASCADES	5.77045e-09	3.11325e-07	0.761461	0.7246	2.4283	34	CLU, TFPI, VWF, SERPINA1, PLAU, PLAUR, SERPINE1, THBD, C5AR1, C3AR1, C1QB, C1QC, CFD, F3, C3, CFH, PROS1, SERPING1
GOBP	GOBP_EXTERNAL_ENCAPSULATING_STRUCTURE_ORGANIZATION	6.61122e-09	3.55121e-07	0.761461	0.473555	2.09823	156	ENG, ADAMTSL4, SPINT1, COL9A2, MMP1, TNFRSF1A, MMP19, LRP1, BCL3, CRISPLD2, LAMC1, CTSS, FLOT1, MMP9, TNFRSF1B, CAPG, PTX3, COMP, TGFBI, MMP25, GFAP, LOXL3, APP, CST3, QSOX1, PLOD3, CYP1B1, ADAM15, ERO1A, FURIN, NOTCH1, GAS6, DPP4, GSN, TMEM38B, TGFBR1, ADAM8, VWA1, LCP1, LAMB2, MMP2, IL6, TNF, PHLDB1, DDR1, RAMP2, COL10A1, ADTRP, COLGALT1, HSD17B12
GOBP	GOBP_REGULATION_OF_MONONUCLEAR_CELL_MIGRATION	6.64991e-09	3.55639e-07	0.761461	0.571419	2.30521	85	CX3CR1, CCR2, LGALS3, THBS1, FPR2, PYCARD, SPI1, AIF1, CCL2, CCL20, LGMN, SERPINE1, CCL3, LYN, C5AR1, C3AR1, ECM1, CCR1, PLCB1, CSF1R, CCL7, CMKLR1, APP, SLC8B1, GAS6, PLA2G7, ADAM8, TNF, ADAM17, MOSPD2, PTK2, SPN, ADTRP, CREB3, ANO6, MAPK3, CALR, AKT1, MSN, OXSR1
GOBP	GOBP_NEUTROPHIL_CHEMOTAXIS	7.17289e-09	3.81941e-07	0.761461	0.593621	2.32509	72	PPBP, CCL23, S100A12, S100A9, S100A8, LGALS3, NOD2, TNFAIP6, CXCL1, CCL2, CCL20, CD300H, CSF3R, CCL3, CXCL3, C5AR1, C3AR1, CCL8, FCER1G, PF4V1, PF4, C5AR2, CCL7, CXCL6, ITGA9, IL1B, DPP4, SYK, CXCR1, TREM1, MOSPD2, ITGB2, PPIA, CXCL8, MPP1, VAV3, JAML, EDN1
GOBP	GOBP_REGULATION_OF_MRNA_PROCESSING	7.39093e-09	3.91847e-07	0.761461	-0.465378	-2.27952	113	SF1, HNRNPU, RBM5, CPSF7, VIRMA, CPSF6, SF3B4, SRSF6, SRSF2, RBFOX2, DAZAP1, HNRNPK, NUDT21, CDC73, RBM7, MBNL1, CWC22, DHX9, SRPK3, PAF1, PAPOLA, NCL, SRRM1, CELF1, DYRK1A, RBM8A, SAFB, RBMXL1, SAFB2, YTHDC1, SNRNP70, CCNT1, FAM172A, JMJD6, METTL16, RBM39, TRA2B, PTCD2, CTR9, SRSF10, ZC3H14, WTAP, SAP18, REST, CDK9, RBM15, MBNL3, PRPF19, DDX5, PRDX6, SRPK2, SNW1, MBNL2, SON, HSPA8, KHDRBS1, LEO1
GOBP	GOBP_LEUKOCYTE_DEGRANULATION	8.0175e-09	4.23234e-07	0.74774	0.616684	2.34029	59	PTAFR, CCR2, ADGRE2, HCK, FGR, HMOX1, FCGR2B, ANXA3, ITGAM, CD300A, SPI1, GATA2, FES, CCL3, LYN, PRAM1, ADORA2B, GAB2, PTGDS, RAB27A, SYK, LAMP1, RABGEF1, STXBP2, ITGB2, CD177, LAT2, BTK
GOBP	GOBP_RESPONSE_TO_ORGANIC_CYCLIC_COMPOUND	8.54071e-09	4.48919e-07	0.74774	0.347181	1.71352	562	CLU, ADM, TRPM4, PTAFR, ENG, AQP3, P2RY2, TFPI, SOD2, HTR7, AQP9, STING1, VDR, MSR1, THBS1, SLC1A3, NOD2, ANXA3, CARD9, MMP19, AIF1, HES1, FES, PAQR7, CCL2, KCNMB1, IRAK3, P2RX1, FOSL1, DUSP6, DAB2, TLR2, IDH1, PRKAR2B, IL18, FKBP1B, TSPO, FLOT1, CCL3, CYBB, LYN, PTGER2, THBD, IL10, KCNQ1, ACSL1, G6PD, SRC, ACOD1, IL1RN, P2RY13, P2RY12, CD36, SOCS2, ITGA2, ZNF703, NR1H3, CEBPA, PLCB1, IL1A, RXRA,…
GOBP	GOBP_NEGATIVE_REGULATION_OF_PEPTIDASE_ACTIVITY	9.69263e-09	5.05325e-07	0.74774	0.500835	2.14586	125	TFPI, CSTA, SERPINA1, PLAUR, THBS1, SERPINB1, CTSB, SPINT1, TIMP1, PZP, LRP1, NOL3, NAIP, SERPINE1, HGF, SRC, RENBP, MMP9, ECM1, VEGFA, APLP2, KLF4, SERPINB10, ANXA2, APP, CST3, GAPDH, PRDX5, FURIN, GAS6, PRDX3, C3, SERPINB8, CSTB, CD109, GPX1, PICALM, TFPI2, TNF, PROS1, SERPINE2, IFI16, SERPING1, CDKN2D, POR, SERPINB2, PTGS2, MICAL1, CD44, SFN, CAST, AKT1
GOBP	GOBP_RNA_LOCALIZATION	9.69637e-09	5.05325e-07	0.74774	-0.403661	-2.03647	162	G3BP2, PHAX, HNRNPU, NUP107, NUP160, CASC3, SENP2, AHCTF1, CPSF6, NUP43, XPOT, NSUN2, TSC1, TGFBR2, ATXN2, THOC3, SHQ1, POLDIP3, SMG5, FYTTD1, POLR2D, UPF2, RAE1, TOMM20, NUP54, NPM1, DHX9, SMG7, PCID2, RFTN1, CHTOP, TERF1, BICD1, NUP35, NXF1, SETD2, KPNB1, CKAP5, SMG6, AKAP8L, XPO5, ALKBH5, ZNHIT3, NUP42, ZC3H11A, RTRAF, ATM, XPO1, UPF1, MRPL18, SIDT1, YTHDC1, NOL6, NXT1, WRAP53, NUP88, PRPF6, C…
GOBP	GOBP_REGULATION_OF_ION_TRANSMEMBRANE_TRANSPORT	1.00816e-08	5.23176e-07	0.74774	0.416233	1.94047	249	PTAFR, CCR2, TREM2, STOM, SLC31A2, TMEM37, DAPK1, KCNK13, IFNGR2, CCL2, KCNMB1, P2RX1, FKBP1B, CTSS, CYBB, LYN, KCNQ1, G6PD, MMP9, CLIC1, TCIRG1, SLC43A2, GEM, TPCN2, VMP1, STAC3, GPR35, SLC6A9, YWHAE, PRKACA, APP, SLC8A1, EPHB2, KCNK6, CYBA, CBARP, CAPN3, KCNH3, GSTO1, KCNH4, ADRB2, ATP1B3, KCND1, CAPN1, EHD3, TMEM38B, SCN1B, CALM3, SESTD1, PPIF, KCNJ2, HTT, CHD7, TNF, JSRP1, RGS2, RNF207, ANTKM…
GOBP	GOBP_POSITIVE_REGULATION_OF_PROTEIN_PHOSPHORYLATION	1.02556e-08	5.29957e-07	0.74774	0.361281	1.7705	463	CLU, MARCO, NRG1, CX3CR1, S100A12, ENG, FCGR1A, TREM2, FAM20A, LILRA5, SPHK1, NRP1, PLAUR, SLC11A1, THBS1, OSM, NOD2, FPR2, TNFRSF1A, CD300A, GPRC5A, AIF1, HES1, HFE, CLEC7A, DAB2, IL18, LIF, TEK, AZU1, FLOT1, HGF, CAMKK2, LYN, ACSL1, GPNMB, SRC, TNFRSF11A, MMP9, SDCBP, PTPN1, HBEGF, NPTN, TLR4, CD36, SASH1, ANG, VEGFA, TLR6, MAP3K11, CSF1R, STK3, BMP6, YES1, ARRB1, NCF1, IQGAP1, APP, IL1B, MAP2K…
GOBP	GOBP_REGULATION_OF_CELL_ACTIVATION	1.17343e-08	6.03823e-07	0.74774	0.367897	1.79227	439	CD9, PTAFR, CCR2, ADGRE2, VNN1, SELP, FGR, TNIP2, EMILIN2, TREM2, HMOX1, LGALS3, LILRA5, FCGR2B, NECTIN2, SPHK1, THBS1, LST1, MERTK, NOD2, HLX, PYCARD, ITGAM, LILRB4, CD300A, SPI1, LDLR, GRN, AIF1, HES1, GATA2, FES, FGL2, CCL2, HFE, CTSC, CD300LF, CLEC7A, VSIG4, IL18, FN1, NFAM1, CCL3, LYN, THBD, IL10, GPNMB, SRC, PDCD1LG2, PLSCR1, TYROBP, FCER1G, TNFRSF1B, SLC46A2, TNFSF13B, TLR4, TNFRSF21, VSIR…
GOBP	GOBP_MYELOID_LEUKOCYTE_DIFFERENTIATION	1.20902e-08	6.19532e-07	0.74774	0.476497	2.09651	151	BATF, SNX10, TREM2, SBNO2, TNFAIP6, LILRB4, SPI1, GATA2, FES, TLR2, NOTCH2, LIF, LTBR, TRIB1, CCL3, LYN, OSCAR, SRC, TNFRSF11A, MMP9, MAFB, TYROBP, TCIRG1, TLR4, CCR1, PF4, CEBPA, VEGFA, CSF1R, GAB2, C1QC, CDK6, CEBPB, ANXA2, APP, PDE1B, ESRRA, BATF3, PTPN2, CD109, HCLS1, ATP6AP1, TNF, MITF, PPARGC1B, KLF10, PSEN1, GBA, TCTA, IFI16
GOBP	GOBP_ANION_TRANSPORT	1.22383e-08	6.2451e-07	0.74774	0.400107	1.89104	290	EMB, PTGES, PTAFR, AQP9, SLC47A1, ABCC4, MGST1, SLC11A1, SLC46A1, SLC1A3, SLC7A7, PSAP, SLC37A2, RHAG, TSPO, KCNQ1, TNFRSF11A, CLIC1, SERINC5, ABCC3, CD36, SLC43A2, SLCO2B1, SLC16A3, SLC2A6, TTYH3, CLCN5, IL1A, AKR1C1, SLC6A6, SLCO4A1, SLC6A9, SLC36A4, SLC24A3, GFAP, CEBPB, PCYOX1, SLC7A8, IL1B, SLC25A24, BEST1, LRRC8B, ABCC1, SLC17A9, APBA1, SLC1A2, CYB5R1, SLC26A8, SYK, FOLR2, TTYH2, SLC2A14, S…
WP	WP_NUCLEAR_RECEPTORS_METAPATHWAY	1.34947e-08	6.85765e-07	0.74774	0.44236	2.00022	193	NRG1, PRRG4, SERPINA1, ABCC4, HMOX1, STOM, ALOX5AP, MGST1, VDR, SLC39A4, HES1, CCL2, CCL20, S100P, CYP3A5, BLVRB, CAVIN2, MAFG, HGF, MYOF, THBD, G6PD, SLC39A1, SRC, SPRY1, MGST2, PGD, ABCC3, HBEGF, SLCO2B1, SRXN1, SLC2A6, NR1H3, SLC2A5, CBR1, SLC6A6, SLC6A9, RXRA, CDC42EP3, DBI, BHLHE40, CDKN1C, GSTP1, IL1B, FTL, CYP1B1, B3GNT5, MGST3, FGD4, ABHD2, ACAA1, SLC2A14, NFE2L2, TNF, RGS2, CPEB4, PDK4, …
GOBP	GOBP_EXOCYTOSIS	1.405e-08	7.11032e-07	0.74774	0.418078	1.95109	248	PTAFR, RAB3D, CCR2, ADGRE2, HCK, FGR, ABCC4, HMOX1, FCGR2B, RAB31, ANXA3, ITGAM, CD300A, SPI1, GATA2, FES, CTBP2, SCIN, STX11, P2RX1, SEPTIN5, CCL3, LYN, SDCBP, CCL8, BRSK2, UNC13B, ITSN1, RAB13, CCR1, TPCN2, PRAM1, ATP2A2, ADORA2B, TNFAIP2, GAB2, SYN1, WASHC3, PLEK, RAB11FIP5, PPFIA3, STX1A, P2RY1, CBARP, RAB10, RIMS3, NOTCH1, CHMP2A, SLC17A9, PTGDS, APBA1, PAK1, CALM3, RAB27A, SYK, SYNGR2, RAB1…
REACTOME	REACTOME_SUMOYLATION	1.51803e-08	7.65073e-07	0.733762	-0.419252	-2.13029	152	MRTFA, XPC, SP3, NRIP1, STAG1, NUP107, NUP160, SENP2, UHRF2, NUP43, STAG2, TOPORS, ZNF350, PHC3, RAD21, BLM, TOP2B, NR4A2, NR2C1, PIAS1, MBD1, PCNA, HNRNPK, PHC1, RAE1, NUP54, NPM1, PHC2, PIAS2, HDAC1, NR3C1, HDAC7, CBX8, SUZ12, NUP35, HDAC2, NR3C2, ING2, THRA, NUP42, TP53, UBA2, SAFB, CBX4, HNRNPC, NCOA1, SENP5, DNMT3B, TRIM27, NUP88, MDC1, NCOA2, CREBBP, PIAS3, NUP155, SATB1, NSMCE4A, TRIM28, S…
GOBP	GOBP_REGULATION_OF_HYDROLASE_ACTIVITY	1.539e-08	7.72465e-07	0.733762	0.335214	1.67092	661	CCL23, S100A9, PTAFR, TFPI, CSTA, SERPINA1, ASAP2, RASGRP4, S100A8, MEFV, LGALS3, PLAUR, THBS1, ARAP3, SERPINB1, BVES, CTSD, CTSB, SCARB2, PSAP, SPINT1, DAPK1, CASP4, TIMP1, PYCARD, CARD9, CD300A, GRN, PZP, CCL2, PCSK6, CCL20, RGL3, LRP1, MTSS2, P2RX1, CLEC7A, LGMN, NOL3, NAIP, CASP1, PLXNB2, FKBP1B, SERPINE1, HGF, FN1, CCL3, ADPRH, LYN, SRC, TBC1D12, C5AR1, RENBP, MMP9, CCL8, SPRY1, P2RY12, ECM1…
GOBP	GOBP_REGULATION_OF_MRNA_CATABOLIC_PROCESS	1.57214e-08	7.85879e-07	0.733762	-0.426136	-2.13198	142	CNOT8, TENT5C, ZC3HAV1, PDE12, GTPBP1, FASTKD1, HNRNPU, HNRNPA0, CNOT6L, ZFP36L2, CASC3, CSDE1, FASTKD5, TOB1, ROCK2, PUM1, EIF4A3, CNOT2, METTL14, CNOT1, HNRNPD, TNRC6C, POLR2D, CNOT7, AXIN2, CARHSP1, NPM1, DHX9, YTHDF2, PCID2, RC3H2, EXOSC9, EIF4ENIF1, TNRC6B, BTG2, FASTKD2, CNOT6, ALKBH5, TRAF3IP2, CELF1, RBM8A, GIGYF2, UPF1, PAIP1, NT5C3B, PATL2, EXOSC8, HNRNPC, EXOSC2, DCP1B, HNRNPM, DIS3, M…
GOBP	GOBP_RNA_EXPORT_FROM_NUCLEUS	1.64865e-08	8.20772e-07	0.733762	-0.55444	-2.4267	64	PHAX, NUP107, NUP160, CPSF6, XPOT, NSUN2, TSC1, THOC3, POLDIP3, SMG5, FYTTD1, POLR2D, UPF2, RAE1, NPM1, DHX9, SMG7, PCID2, CHTOP, NXF1, SETD2, SMG6, AKAP8L, XPO5, ALKBH5, ZC3H11A, UPF1, YTHDC1, NOL6, NXT1, NUP88, NUP155, NUP62, RAN, DDX39A, NUP133, GLE1, ALYREF, MCM3AP
GOBP	GOBP_REGULATION_OF_CYTOSOLIC_CALCIUM_ION_CONCENTRATION	1.66868e-08	8.27381e-07	0.733762	0.442437	2.00233	194	ADM, CX3CR1, TRPM4, CCR2, FPR3, FPR1, FPR2, GATA2, ITGAV, P2RX1, NOL3, FKBP1B, CCL3, LYN, PTGER2, C5AR1, C3AR1, NPTN, CD36, CCR1, TPCN2, C5AR2, GPR35, CMKLR1, YWHAE, GRIN2C, PRKACA, CCRL2, SLC8A1, CDH23, GP1BA, SLC8B1, CYBA, P2RY1, CAPN3, GNA15, FFAR4, GSTO1, GP9, GPR157, ERO1A, PTGIR, TMEM38B, CALM3, TRPM2, TMBIM6, CXCR1, HTT, CHD7, JSRP1, CDK5, MCOLN1, RYR1, P2RY6, FKBP1A, CCR5, PTPN6, SRI, TME…
GOBP	GOBP_REGULATION_OF_CELL_ADHESION	1.70515e-08	8.42055e-07	0.733762	0.352454	1.73403	502	JAG2, ALOX5, ZFHX3, CD9, PTAFR, CCR2, VNN1, SELP, ADAMDEC1, EMILIN2, PLAU, LGALS3, FCGR2B, NRP1, PLAUR, THBS1, NOD2, HLX, PYCARD, LILRB4, CD300A, SPI1, AIF1, VCL, HES1, FES, FGL2, CCL2, HFE, ITGAV, DAB2, VSIG4, PLXNB2, IL18, SERPINE1, LIF, JAG1, TEK, DOCK5, AZU1, FLOT1, FN1, LYN, IL10, GPNMB, SRC, IL1RN, PDCD1LG2, P2RY12, TNFSF13B, CD36, ITGA2, PLXNC1, TNFRSF21, VSIR, ZNF703, VEGFA, IL1A, TGFBI, …
HALLMARK	HALLMARK_ANGIOGENESIS	1.72994e-08	8.50867e-07	0.733762	0.784583	2.49605	25	JAG2, NRP1, TIMP1, S100A4, ITGAV, JAG1, VCAN, THBD, LPL, TNFRSF21, PF4, VEGFA, CXCL6, APP, OLR1, SPP1, PTK2
GOBP	GOBP_REGULATION_OF_CELL_CYCLE	1.74966e-08	8.57124e-07	0.733762	-0.255964	-1.54922	804	RIOK2, TNFAIP3, JUND, ID3, SMARCA5, BIRC2, TSPYL2, IRF1, MADD, CEP76, LRP5, PDCD4, XPC, PLRG1, MAP2K6, CDC23, TAF1, WAC, SYF2, SKP2, HECA, BTN2A2, HNRNPU, ACTR8, JADE2, USP47, NPR2, GADD45A, CCNG2, FBXL3, ZFP36L2, YTHDC2, CCSAP, SIRT1, JADE1, SENP2, AHCTF1, DYRK3, RGCC, BTG1, MDM1, UHRF2, RBL2, KAT14, CDK13, PLK2, WAPL, RPA2, TERF2, ING3, NSUN2, APBB1, MTA3, TSC1, AMBRA1, HBP1, HEXIM1, MRE11, CCP…
GOBP	GOBP_REGULATION_OF_CATION_TRANSMEMBRANE_TRANSPORT	1.99767e-08	9.73314e-07	0.733762	0.439641	1.98793	193	CCR2, TREM2, STOM, SLC31A2, DAPK1, IFNGR2, CCL2, KCNMB1, P2RX1, FKBP1B, CTSS, LYN, KCNQ1, G6PD, MMP9, TCIRG1, SLC43A2, GEM, VMP1, STAC3, GPR35, SLC6A9, YWHAE, PRKACA, APP, SLC8A1, EPHB2, CYBA, CBARP, CAPN3, GSTO1, ADRB2, ATP1B3, CAPN1, EHD3, TMEM38B, SCN1B, CALM3, SESTD1, PPIF, KCNJ2, HTT, CHD7, JSRP1, RGS2, RNF207, ANTKMT, CDK5, VDAC1, GLRX, PDZK1, SLC30A1, P2RY6, FKBP1A, CNKSR3, PTPN6, SRI, TME…
GOBP	GOBP_REGULATION_OF_ENDOCYTOSIS	2.00274e-08	9.73314e-07	0.733762	0.473322	2.07829	147	CLU, TREM2, LGALS3, RAB31, SPHK1, MCTP1, CD300A, CD151, GATA2, HFE, LRP1, ITGAV, DAB2, SERPINE1, CD14, FLOT1, SRC, SDCBP, PTPN1, CD36, ITGA2, NR1H3, VEGFA, ARRB1, ANXA2, APP, HIP1, PPT1, RAB4A, C3, CALM3, TNK2, SYK, SNX33, ANKRD13D, EHD4, PICALM, PSEN1, INSR, RABGEF1, ABCA7, CD177, ZFYVE16, LRRTM2, RAB5B, SYT11, NUMB, SCAMP5, APOE, ANO6, OPHN1, STON2, PIK3CB, AP2M1, AP2S1, BTBD9, ARRB2
GOBP	GOBP_NEGATIVE_REGULATION_OF_RESPONSE_TO_EXTERNAL_STIMULUS	2.04021e-08	9.87608e-07	0.733762	0.411965	1.92484	259	ALOX5, CD9, TFPI, HCK, FGR, TREM2, MEFV, PLAU, FCGR2B, NRP1, THBS1, NOD2, HTRA1, FPR2, TNFAIP6, TNFRSF1A, LDLR, GRN, AIF1, FGL2, CCL2, IRAK3, METRNL, VSIG4, RHBDF2, SERPINE1, TEK, TRIB1, HGF, AOAH, LYN, THBD, IL10, SRC, ACOD1, TNFRSF1B, NR1H3, SEMA4A, C5AR2, TREX1, KLF4, YES1, ALOX12, LPCAT3, GSTP1, GP1BA, NLRP3, LILRA2, SEMA6B, FFAR4, SEMA3C, NLRP12, FURIN, NOTCH1, DPP4, PTPN2, PRKCD, SYK, CD109…
bioplanet	bioplanet_Alzheimer's disease	2.07681e-08	1.00137e-06	0.733762	0.506602	2.14833	117	NDUFS8, TNFRSF1A, LRP1, LPL, COX6B1, GNAQ, PLCB1, ATP2A2, GRIN2C, BACE2, APP, IL1B, GAPDH, APAF1, CAPN1, CALM3, PSENEN, NCSTN, NDUFV2, TNF, ADAM17, NDUFB7, CDK5, COX4I1, PSEN1, NDUFB2, CASP7, NDUFS6, NDUFA8, PLCB2, APOE, ATF6, NDUFS3, UQCRH, SDHC, MAPK3, CALML6, CAPN2, PLCB3, BAD, COX5A, BID, NDUFV1, COX2, NDUFB3, NDUFB8, COX8A, NDUFA9, NDUFS7, BACE1, ATP8, CASP9, CASP12, PPP3CA, UQCRB, PSEN2, ND…
GOBP	GOBP_REGULATION_OF_IMMUNE_EFFECTOR_PROCESS	2.10655e-08	1.01172e-06	0.733762	0.412515	1.92467	257	CX3CR1, TRPM4, PTAFR, CCR2, ADGRE2, FGR, TREM2, HMOX1, LGALS3, FCGR2B, NECTIN2, NOD2, HLX, ITGAM, LILRB4, CD300A, SPI1, GRN, FCN1, GATA2, FES, FGL2, IRAK3, HFE, CLEC7A, VSIG4, IL18, IL1R1, LYN, IL10, TYROBP, TNFRSF1B, TLR4, CD36, SCIMP, PRAM1, TREX1, ADORA2B, MYB, GAB2, CLEC4G, CD5L, CXCL6, LOXL3, NCF1, EPHB2, IL1B, NLRP3, BCL6, FUT7, LACC1, GPRC5B, ICAM1, TICAM1, C3, CADM1, SYK, TMBIM6, LAMP1, C…
bioplanet	bioplanet_FSH regulation of apoptosis	2.14933e-08	1.02824e-06	0.733762	0.448878	2.03406	195	CLU, UPP1, CX3CR1, ITGB5, RAB31, THBS1, HK2, PAPSS2, DAPK1, CASP4, TIMP1, S100A4, GPRC5A, LDLR, VCL, IGFBP4, BCL3, DAB2, IDH1, CD14, PTPRE, PTGER2, PTPN1, NPC2, CD36, GEM, VEGFA, ATP2A2, MT1X, SGK1, S100A6, IER3, CDKN1C, MAP2K3, YBX3, GPRC5B, RAB4A, PLA1A, PGRMC1, PTGDS, ACTA1, RHOB, PPFIA4, PGK1, TLN1, RAB27A, CTNND1, TMBIM6, GNB1, SDC2, TFPI2, IFI35, KLF10, ANXA4, CITED1, FDX1, PSMD1, ALDH3A2, …
GOBP	GOBP_METAL_ION_TRANSPORT	2.20098e-08	1.04885e-06	0.733762	0.354593	1.74117	484	TRPM6, TRPM4, TREM2, STEAP3, LCN2, STOM, LGALS3, LILRA5, SLC31A1, VDR, SLC31A2, SLC11A1, SLC46A1, TMEM37, SLC1A3, KCNK13, CYBRD1, SLC39A4, HES1, SLC22A4, CCL2, KCNMB1, HFE, ITGAV, P2RX1, NOL3, FKBP1B, TSPO, CCL3, LYN, KCNQ1, G6PD, SLC39A1, CCL8, SLC25A37, CCR1, GEM, TPCN2, FLVCR2, VMP1, STAC3, MYLK, ATP2A2, GPR35, SLC6A6, SLC6A9, WFS1, YWHAE, GRIN2C, SLC24A3, SGK1, PRKACA, ABCB8, ATP2C1, ANXA2, S…
GOBP	GOBP_ASTROCYTE_DEVELOPMENT	2.22909e-08	1.05813e-06	0.733762	0.726939	2.41671	32	S100A9, TREM2, S100A8, FPR2, LDLR, GRN, LRP1, C5AR1, TLR4, CDK6, GFAP, APP, IFNGR1, IL1B, VIM, LAMB2, TTBK1, IL6, TNF, PSEN1
GOBP	GOBP_POSITIVE_REGULATION_OF_INTERLEUKIN_6_PRODUCTION	2.24914e-08	1.06352e-06	0.733762	0.564818	2.23172	77	PTAFR, LILRA5, NOD2, PYCARD, CARD9, AIF1, IL1RAP, CLEC7A, TLR2, LPL, TYROBP, TLR8, TLR4, CD36, SCIMP, TLR6, IL1A, ADORA2B, TLR1, APP, IL1B, CYBA, LILRA2, TMEM106A, MYD88, TICAM1, SYK, IL6, TNF, EREG, STAT3, AKIRIN2, RIPK2
GOBP	GOBP_REGULATION_OF_CHROMOSOME_ORGANIZATION	2.27695e-08	1.07253e-06	0.733762	-0.378992	-1.97994	189	RIOK2, SMARCA5, CDC23, HNRNPU, ACTR8, RESF1, WAPL, TERF2, MRE11, RAD21, BUB3, NUMA1, POT1, ZW10, TASOR, SMG5, NFRKB, HNRNPD, MAP3K4, STN1, ERCC4, AXIN2, CUL3, MORC2, ATF7IP2, CDC26, PTTG1, PCID2, TERF1, ZNF304, ATF7IP, SENP6, SFPQ, TERF2IP, SMG6, ZNF207, USP7, MAD2L1BP, TNKS2, ATM, SLX4, APC, NAT10, UPF1, PRKCQ, ACTR5, SLF2, HNRNPC, CTCF, CDK5RAP2, SETDB2, ANAPC1, GTF2H2, MAD2L1, ANAPC4, CCT4, LC…
GOBP	GOBP_REGULATION_OF_ANATOMICAL_STRUCTURE_MORPHOGENESIS	2.35858e-08	1.10673e-06	0.733762	0.339273	1.68129	601	MYH14, ADM, ALOX5, CX3CR1, ENG, NIBAN2, CCR2, GLUL, HCK, CYFIP1, FGR, EMILIN2, STAB1, HMOX1, SPHK1, NRP1, THBS1, LST1, BVES, ANXA3, HK2, TNFSF12, CLDN5, GRN, CDC42EP2, HES1, GATA2, FES, BAIAP2, CCL2, MTCH2, DAB2, RHOU, PLXNB2, SERPINE1, LIF, TEK, DOCK5, COCH, HGF, FN1, CCL3, SPRED1, CYBB, IL10, GPNMB, SRC, C5AR1, C3AR1, SPRY1, SS18L1, BRSK2, TNFSF13B, ECM1, SPAG9, ABI3, SASH1, PLXNC1, PF4, SEMA4A…
HALLMARK	HALLMARK_INTERFERON_GAMMA_RESPONSE	2.40246e-08	1.12301e-06	0.733762	0.460544	2.05415	168	UPP1, FCGR1A, SOD2, SELP, FPR1, MVP, TNFAIP6, CASP4, FGL2, CCL2, MTHFD2, IFI30, CASP1, PTPN1, PLSCR1, CSF2RB, TNFAIP2, CCL7, CMKLR1, HIF1A, LATS2, APOL6, MT2A, IRF5, IFNAR2, IDO1, CDKN1A, MX2, IL15RA, LGALS3BP, MYD88, PTPN2, ICAM1, IFI44L, SAMD9L, CFH, TOR1B, IL6, RNF213, ARID5B, IFI35, MX1, CD274, SAMHD1, PSME2, CASP7, SERPING1, CD86, ST8SIA4, PTPN6, SRI, STAT3, PLA2G4A, PSMB9, PTGS2, RIPK2, PFK…
GOBP	GOBP_CHEMOKINE_PRODUCTION	2.52845e-08	1.17741e-06	0.733762	0.58243	2.28125	72	TREM2, MEFV, HMOX1, NOD2, PYCARD, CARD9, LILRB4, AIF1, CLEC7A, TLR2, IL18, AZU1, IL10, LPL, TLR4, CSF1R, ADORA2B, KLF4, HIF1A, CXCL6, APP, GSTP1, IL1B, MYD88, TICAM1, SYK, IL6, TNF, ARG2, ADAM17, TREM1
GOBP	GOBP_G_PROTEIN_COUPLED_RECEPTOR_SIGNALING_PATHWAY	2.56096e-08	1.18803e-06	0.733762	0.36982	1.78547	386	CCL23, MARCO, ADM, CX3CR1, PTAFR, CCR2, P2RY2, ADGRE2, HTR7, RASGRP4, FPR3, FPR1, RGS18, SPHK1, GPR141, FPR2, ADGRE1, PSAP, CXCL1, GPRC5A, DAGLB, GNB4, GPR162, FCN1, CCL2, CCL20, AGTRAP, GPR27, AZU1, CCL3, PTGER2, KCNQ1, DAGLA, SRC, C5AR1, C3AR1, CCL8, P2RY13, P2RY12, CCR1, PF4, GNAQ, C5AR2, PLCB1, OXER1, GPR35, ADORA2B, APLP2, RGS17, SORT1, CCL7, CMKLR1, GPR84, RGS19, ARRB1, PLEK, CCRL2, GNG11, …
GOBP	GOBP_CELL_CELL_SIGNALING	2.58796e-08	1.19603e-06	0.733762	0.308017	1.55321	901	CCL23, ADM, ALOX5, NRG1, WLS, CX3CR1, TRPM4, S100A9, PTGES, NIBAN2, CCR2, GLUL, HTR7, CYFIP1, STAB1, S100A8, ABCC4, GRB10, GUCY1B1, NRP1, OSM, SLC1A3, MERTK, MCTP1, TNFAIP6, TMEM170B, ITGAM, DAGLB, RETN, ICA1, HES1, ZYX, IL1RAP, BAIAP2, CCL2, KCNMB1, HFE, IGFBP4, CTBP2, CCL20, LRP1, STX11, P2RX1, LGMN, DAB2, TLR2, NPTX2, SEPTIN5, GUCY1A1, PRKAR2B, IL18, FKBP1B, LIF, NXN, GPR27, TEK, FLOT1, HGF, C…
GOBP	GOBP_GLIAL_CELL_DEVELOPMENT	2.60598e-08	1.19983e-06	0.733762	0.563869	2.2273	76	CLU, NRG1, S100A9, TREM2, S100A8, FPR2, LDLR, GRN, LRP1, TLR2, B4GALT5, LYN, C5AR1, TLR4, CDK6, GFAP, APP, IFNGR1, IL1B, VIM, PLEC, LAMB2, TTBK1, IL6, NCSTN, TNF, CDK5, PSEN1, ARHGEF10, PARD3, ILK, SIRT2, NDRG1
GOBP	GOBP_POSITIVE_REGULATION_OF_ION_TRANSPORT	2.79364e-08	1.28141e-06	0.733762	0.470691	2.07725	154	PTGES, PTAFR, CCR2, TREM2, LGALS3, LILRA5, IFNGR2, CCL2, KCNMB1, P2RX1, CTSS, TSPO, CCL3, KCNQ1, G6PD, TNFRSF11A, P2RY12, CCR1, VMP1, STAC3, MYLK, IL1A, SLC6A9, WFS1, CEBPB, EPHB2, IL1B, P2RY1, CAPN3, LILRA2, GSTO1, ADRB2, ATP1B3, EHD3, SCN1B, CALM3, KCNJ2, HTT, RNF207, ANTKMT, CDK5, PSEN1, GLRX, PDZK1, P2RY6, CNKSR3, SRI, PLA2G4A, ANO6, AKT1, CEMIP, EDN1, ARRB2, P2RX4, SCN3B, PLA2G6, SLC9A1
GOBP	GOBP_ORGANIC_ACID_METABOLIC_PROCESS	2.84633e-08	1.29587e-06	0.733762	0.33662	1.67113	614	ALOX5, PTGES, GLUL, VNN1, TBXAS1, HK3, DPYD, ALOX5AP, SLC46A1, SLC1A3, SLC7A7, HK2, PAPSS2, TNFRSF1A, CYP39A1, ALDH1A1, DAGLB, PCBD1, ENO1, HACD4, CYP3A5, MTHFD2, TLR2, IDH1, PRKAR2B, ASAH1, HAL, GATM, AOAH, ACSL1, DAGLA, PLA2G15, DGAT2, RENBP, LPL, MGST2, SERINC5, PGD, GALK1, CD36, GNPDA1, SLC2A6, NPL, NR1H3, CTH, DHRS9, TREX1, LTA4H, AKR1C1, CBR1, ACSS2, KYNU, ELOVL7, HIF1A, ACAD10, IVD, LDHA, …
GOBP	GOBP_TRANSITION_METAL_ION_HOMEOSTASIS	2.83834e-08	1.29587e-06	0.733762	0.525466	2.18369	102	S100A9, SOD2, S100A8, STEAP3, HMOX1, LCN2, SLC31A1, SLC31A2, SLC11A1, SLC46A1, CYBRD1, SLC39A4, HFE, RHAG, ATP6V1A, SLC25A37, ATP6V0D1, MT1X, SLC6A9, HIF1A, BMP6, MT2A, APP, FTL, STEAP4, CCDC22, ATP6AP1, PICALM, MT1E, ANKRD9, SLC30A1, ATOX1, FRRS1, SRI, COX19
GOBP	GOBP_REGULATION_OF_LIPID_LOCALIZATION	2.90886e-08	1.31944e-06	0.733762	0.525326	2.18311	102	ABCG4, PTGES, TREM2, MSR1, THBS1, RETN, LRP1, ITGAV, DAB2, TSPO, ACSL1, TNFRSF11A, LPL, CD36, NR1H3, IL1A, RXRA, BMP6, TTC39B, LPCAT3, ANXA2, DBI, IL1B, SURF4, FURIN, PRELID1, PTPN2, PLIN2, PRKCD, C3, SYK, YJEFN3, IL6, SPP1, LAMTOR1, TNF, ABCA7, TMEM30A, PLA2G4A, ABHD5, APOE, SREBF2, AKT1, ABCA1, EDN1, NUS1, P2RX4, PLA2G6, ACSL5, SCP2
GOBP	GOBP_RNA_3_END_PROCESSING	3.00397e-08	1.35755e-06	0.719513	-0.492632	-2.28234	93	SCAF8, RPRD2, ZNF473, INTS6, CSTF2T, CPSF7, VIRMA, TENT2, CPSF6, INTS12, ERI1, ELAC1, WDR33, PAPOLG, INTS8, INTS6L, POLR2D, CLP1, NUDT21, CDC73, ERI2, CSTF1, PAF1, CSTF3, EXOSC9, PAPOLA, EXOSC4, TRMT10C, EXOSC8, MTPAP, EXOSC2, YTHDC1, CCNT1, INTS7, INTS1, RPRD1B, EXOSC3, CTR9, PNPT1, ZC3H14, TUT4, CDK9, CPSF4, EXOSC10
GOBP	GOBP_CELL_MORPHOGENESIS	3.03527e-08	1.36665e-06	0.719513	0.330007	1.64427	645	MYH14, CLU, EMB, NRG1, MYO7A, NIBAN2, HCK, CYFIP1, FGR, NRP1, VDR, LST1, SLC1A3, BVES, MERTK, ALCAM, SPI1, CDC42EP2, VCL, HES1, FES, BAIAP2, CCL2, ITGAV, DAB2, MPIG6B, LAMC1, RHOU, PLXNB2, NOTCH2, LIPA, TEK, DOCK5, COCH, FLOT1, HGF, FN1, B4GALT5, CCL3, GFRA3, SRC, SS18L1, BRSK2, NPTN, SPAG9, PXN, ABI3, PLXNC1, SEMA4A, VEGFA, LRTM2, OLFM1, CSF1R, APLP2, CCL7, MYL12B, CDC42EP3, CAPZB, SGK1, LYPLA2,…
GOBP	GOBP_REGULATION_OF_PROTEOLYSIS	3.20056e-08	1.4358e-06	0.719513	0.348616	1.71579	500	CLU, S100A9, RNF144B, TFPI, CSTA, SERPINA1, TREM2, LDLRAD3, S100A8, MEFV, PLAUR, THBS1, SERPINB1, CTSD, CTSB, SPINT1, DAPK1, CASP4, TIMP1, PYCARD, CARD9, GRN, PZP, HFE, CTSC, LRP1, ENO1, QRICH2, P2RX1, CLEC7A, LGMN, NOL3, NAIP, DAB2, CASP1, SERPINE1, TRIB1, HGF, FN1, LYN, IL10, SRC, RENBP, MMP9, SDCBP, TNFRSF1B, ECM1, NLRC4, VSIR, NR1H3, CEBPA, VEGFA, APLP2, KLF4, MDM2, PRKACA, SERPINB10, LPCAT3,…
bioplanet	bioplanet_Messenger RNA splicing: major pathway	3.42365e-08	1.53027e-06	0.719513	-0.58262	-2.47021	57	HNRNPU, HNRNPA0, RBM5, CPSF7, SRSF6, CCAR1, SRSF2, HNRNPD, HNRNPUL1, CLP1, HNRNPK, NUDT21, SRSF5, DHX9, SNRPB2, PRPF4, CSTF1, CSTF3, CD2BP2, PAPOLA, SRRM1, RBM8A, HNRNPC, SNRNP70, DNAJC8, HNRNPM, PHF5A, SUGP1
GOBP	GOBP_TUBE_MORPHOGENESIS	3.81952e-08	1.701e-06	0.719513	0.347839	1.71113	526	ADM, ALOX5, CX3CR1, ENG, NIBAN2, CCR2, GLUL, EMILIN2, STAB1, HMOX1, SPHK1, NRP1, VDR, EGFL7, THBS1, ANXA3, HK2, HLX, SPINT1, TNFSF12, SPI1, MMP19, LDLR, CLDN5, GRN, HES1, GATA2, CCL2, LRP1, ITGAV, ANPEP, PLXNB2, NOTCH2, IL18, SERPINE1, PRCP, JAG1, TEK, HGF, FN1, SPRED1, CYBB, IL10, GPNMB, SRC, C5AR1, C3AR1, CCL8, ITGA2B, SPRY1, ECM1, SASH1, PF4, ANG, MTSS1, SEMA4A, VEGFA, COMP, MYLK, IL1A, CSF1R,…
GOBP	GOBP_TUBE_DEVELOPMENT	4.04082e-08	1.79304e-06	0.719513	0.334246	1.66283	632	ADM, ALOX5, CX3CR1, ENG, NIBAN2, CCR2, GLUL, EMILIN2, STAB1, HMOX1, SPHK1, NRP1, VDR, EGFL7, THBS1, ANXA3, HK2, HLX, SPINT1, TNFSF12, SPI1, MMP19, LDLR, CLDN5, GRN, HES1, GATA2, CCL2, LRP1, ITGAV, CRISPLD2, ANPEP, PLXNB2, NOTCH2, LIPA, IL18, SERPINE1, LIF, PRCP, JAG1, TEK, HGF, FN1, SPRED1, CYBB, IL10, KCNQ1, DZIP1L, GPNMB, SRC, C5AR1, C3AR1, CCL8, ITGA2B, SPRY1, ECM1, SASH1, PF4, ANG, CEBPA, MTS…
REACTOME	REACTOME_PEPTIDE_LIGAND_BINDING_RECEPTORS	4.19164e-08	1.85325e-06	0.719513	0.577558	2.26217	72	PPBP, CCL23, CX3CR1, CCR2, FPR3, FPR1, FPR2, PSAP, CXCL1, CCL2, CCL20, CXCL16, CCL3, CXCL3, C5AR1, C3AR1, CCR1, PF4, C5AR2, CCL7, CXCL6, HEBP1, APP, CCRL2, C3, NLN, CXCR1
GOBP	GOBP_TRNA_METABOLIC_PROCESS	4.36277e-08	1.92197e-06	0.719513	-0.393262	-1.98401	162	TRMT12, ELP5, SLFN13, NARS2, TRMT61A, GTF3C5, MTO1, MOCS3, THUMPD1, NSUN2, ELAC1, RPP38, PARS2, TARS2, CLP1, LCMT2, GTF3C4, YARS2, GTF3C2, NSUN6, EXOSC9, METTL8, HARS2, DTWD2, TP53RK, TRMT10C, THUMPD2, RTRAF, OSGEPL1, TRMT5, TSEN54, NAT10, PUS10, POP1, QTRT2, TARS3, EXOSC8, BRF1, ELP1, RPP21, TRMT11, CDK5RAP1, CTU1, EXOSC2, TRMT1L, MARS2, ALKBH1, RARS2, ALKBH8, EARS2, ELP3, DTD2, QRSL1, EXOSC3, T…
GOBP	GOBP_MEMBRANE_LIPID_METABOLIC_PROCESS	4.83595e-08	2.12279e-06	0.719513	0.472729	2.0774	150	ALDH3B1, SPTSSA, SPHK1, PSAP, UGCG, SMPDL3A, PGAP1, HACD4, P2RX1, SPTLC2, ASAH1, B4GALNT1, B4GALT5, FUCA1, PLA2G15, MGST2, SERINC5, ELOVL7, ACER2, CYP1B1, PPT1, FUT7, NAGA, A4GALT, SGMS2, HEXB, B3GNT5, PRKCD, ENPP2, GLB1, HEXA, GBA, SMPD2, ST8SIA4, CERS2, ST3GAL4, PPM1L, HACD2, PIGS, PGAP2, GLTP, SMPD3, GPAA1, ST3GAL6, ST6GALNAC4, ST3GAL2, CERKL, PLA2G6, PIGT, CLN8, ST6GALNAC3, CERK, SUMF1, GLA, …
KEGG	KEGG_OXIDATIVE_PHOSPHORYLATION	4.97238e-08	2.17488e-06	0.719513	0.550694	2.19548	80	NDUFS8, ATP6V0D2, ATP6V1A, TCIRG1, ATP6V0D1, COX6B1, ATP6V0A1, ATP6V1D, ATP6AP1, NDUFV2, ATP6V1B2, NDUFB7, COX4I1, NDUFB2, ATP6V0E1, NDUFS6, ATP5F1E, ATP5F1D, NDUFA8, NDUFS3, UQCRH, SDHC, COX5A, NDUFV1, ATP5MG, NDUFB3, NDUFB8, ATP5PO, COX8A, NDUFA9, COX17, NDUFS7, ATP6V1H, ATP5F1B, ATP5PB, LHPP, UQCRB, NDUFC2, NDUFA10, ATP5PD, NDUFAB1, UQCRC1, COX7B, NDUFB5, COX7A1, COX6C, NDUFS4
WP	WP_BURN_WOUND_HEALING	5.15606e-08	2.2472e-06	0.719513	0.578639	2.24896	69	TLR5, S100A9, F13A1, NOD2, TIMP1, MMP1, CXCL1, CCL2, LY96, TLR2, HGF, FN1, MMP9, TLR8, TLR4, VEGFA, TLR6, IL1A, TLR1, KLF4, S100A6, SPARC, IL1B, MYD88, VIM, ICAM1, ACTA1, CXCL14, MMP2, IL6, TNF, CXCL8, MIR29A, S100A11
GOBP	GOBP_REGULATION_OF_LEUKOCYTE_CHEMOTAXIS	5.41923e-08	2.35352e-06	0.719513	0.53828	2.18821	87	CX3CR1, CCR2, THBS1, NOD2, FPR2, TNFAIP6, SPI1, AIF1, CCL2, LGMN, SERPINE1, CCL3, LYN, C5AR1, C3AR1, CCR1, VEGFA, C5AR2, CSF1R, CCL7, CMKLR1, SLC8B1, GAS6, DPP4, PLA2G7, IL6, ADAM17, MOSPD2, PTK2, CXCL8, MPP1, CREB3, ANO6, MAPK3, CALR, OXSR1, EDN1
GOBP	GOBP_CELLULAR_TRANSITION_METAL_ION_HOMEOSTASIS	5.70901e-08	2.46191e-06	0.719513	0.55002	2.1928	80	S100A9, S100A8, HMOX1, LCN2, SLC31A1, SLC31A2, SLC11A1, SLC46A1, CYBRD1, SLC39A4, HFE, ATP6V1A, ATP6V0D1, MT1X, SLC6A9, HIF1A, BMP6, MT2A, APP, FTL, STEAP4, CCDC22, ATP6AP1, MT1E, ANKRD9, SLC30A1, ATOX1, FRRS1, SRI, COX19
bioplanet	bioplanet_Oxidative phosphorylation	5.70901e-08	2.46191e-06	0.719513	0.548456	2.19215	82	NDUFS8, ATP6V0D2, ATP6V1A, TCIRG1, ATP6V0D1, COX6B1, ATP6V0A1, ATP6V1D, ATP6AP1, NDUFV2, ATP6V1B2, NDUFB7, COX4I1, NDUFB2, ATP6V0E1, ATP6AP2, NDUFS6, NDUFA8, NDUFS3, UQCRH, SDHC, COX5A, NDUFV1, COX2, ND5, NDUFB3, NDUFB8, COX8A, NDUFA9, COX17, NDUFS7, ATP6V1H, ATP8, ND4, LHPP, UQCRB, NDUFC2, NDUFA10, ND4L, NDUFAB1, UQCRC1, COX7B, NDUFB5, COX7A1, ND1, COX6C, NDUFS4
bioplanet	bioplanet_Amoebiasis	6.04076e-08	2.59583e-06	0.704976	0.56597	2.21404	73	SERPINB1, ITGAM, CXCL1, VCL, TLR2, LAMC1, CD14, IL1R1, FN1, IL10, TLR4, GNAQ, PLCB1, PRKACA, SERPINB10, IL1B, GNA15, LAMB2, IL1R2, IL6, TNF, ARG2, ITGB2, GNA11, PTK2, RAB5B, CXCL8, PLCB2, SERPINB2, LAMB3, PIK3CB, PLCB3
WP	WP_VEGFAVEGFR2_SIGNALING_PATHWAY	6.47909e-08	2.77445e-06	0.704976	0.378161	1.81418	355	ENG, FAM120A, SOD2, ITGB5, PLAU, GRB10, NCF2, PLAUR, HTRA1, HLX, VCL, GATA2, CCL2, AP2A1, ITGAV, TMSB10, JAG1, FN1, CAMKK2, CYBB, SRC, CLIC1, SDCBP, PTPN1, PGD, PRKCI, HBEGF, PXN, TPCN2, ATP6V0D1, VEGFA, YWHAE, LDHA, MDM2, CAPZB, CTNNA1, BMX, TKT, F3, NCF1, CDC42BPB, IQGAP1, CCRL2, SLC8A1, EPHB2, MAP2K3, PLOD3, GAPDH, FHOD1, CFL1, TPP1, RAB4A, ADRB2, ICAM1, ADAM9, PRKCD, MKNK1, BCL2L1, PAK1, PGK1…
GOBP	GOBP_REGULATION_OF_CELLULAR_MACROMOLECULE_BIOSYNTHETIC_PROCESS	6.75907e-08	2.88426e-06	0.704976	-0.271424	-1.58222	565	ITM2C, METTL18, CNOT8, OBI1, DYRK2, BRPF3, ID3, SMARCA5, TSPYL2, PAIP2B, PDE12, HNRNPU, ACTR8, JADE2, CHTF18, CNOT6L, ZFP36L2, TRAP1, RNF139, IREB2, GZMB, CASC3, JADE1, SENP2, CSDE1, RGCC, LSM14A, LPIN1, WAPL, TERF2, CCR7, PELO, EHMT2, GSPT1, TSC1, TOB1, ATF4, ROCK2, KAT7, ATXN2, PUM1, POT1, EIF4A3, PXYLP1, WRNIP1, CNOT2, CNBP, BLM, POLDIP3, RFC5, NGRN, SMG5, NFRKB, PUM3, PER1, CDC7, GSK3B, METTL…
bioplanet	bioplanet_GPCR ligand binding	7.20533e-08	3.06402e-06	0.704976	0.462343	2.04995	157	PPBP, CCL23, ADM, CX3CR1, PTAFR, CCR2, P2RY2, HTR7, FPR3, FPR1, FPR2, CXCL1, GNB4, CCL2, CCL20, CXCL16, CCL3, CXCL3, PTGER2, C5AR1, C3AR1, P2RY13, P2RY12, CCR1, PF4, C5AR2, OXER1, ADORA2B, CCL7, CXCL6, HEBP1, APP, GNG11, P2RY1, FFAR4, ADRB2, HRH2, PTGIR, C3, CXCR1, GNB1, RAMP2, GNG5, P2RY6, LTB4R, CCR5, CXCL8, CYSLTR2, GNB2, DHH, F2RL2
GOBP	GOBP_POSITIVE_REGULATION_OF_PHOSPHORUS_METABOLIC_PROCESS	7.49e-08	3.16202e-06	0.704976	0.334054	1.65018	569	CLU, MARCO, NRG1, CX3CR1, S100A12, PTAFR, ENG, FCGR1A, FGR, TNFAIP8L3, TREM2, FAM20A, LILRA5, SPHK1, NRP1, PLAUR, SLC11A1, THBS1, OSM, MERTK, NOD2, FPR2, TNFRSF1A, CD300A, GPRC5A, AIF1, HES1, HFE, ENO1, CLEC7A, DAB2, IL18, LIF, TEK, AZU1, FLOT1, HGF, CAMKK2, LYN, ACSL1, GPNMB, SRC, TNFRSF11A, MMP9, SDCBP, PTPN1, HBEGF, P2RY12, NPTN, TLR4, CD36, ITGA2, SASH1, ANG, VEGFA, TLR6, MAP3K11, CSF1R, STK3…
GOBP	GOBP_REACTIVE_NITROGEN_SPECIES_METABOLIC_PROCESS	7.50043e-08	3.16202e-06	0.704976	0.621829	2.28959	52	CLU, CX3CR1, SOD2, AIF1, CLEC7A, TLR2, TSPO, IL10, TLR4, CD36, PTX3, TLR6, KLF4, MTARC2, IL1B, CYP1B1, TMEM106A, TICAM1, TNF, ARG2, INSR, POR, PTGS2, AKT1, EDN1, DDAH2, P2RX4
GOBP	GOBP_REGULATION_OF_CELL_POPULATION_PROLIFERATION	7.51326e-08	3.16202e-06	0.704976	0.298106	1.5076	1037	CLU, CCL23, ADM, JAG2, ALOX5, NRG1, CX3CR1, CD9, TRPM4, PTGES, PTAFR, ENG, NIBAN2, CCR2, GLUL, SOD2, HCK, TNFRSF8, TREM2, PLAU, HMOX1, LGALS3, FCGR2B, SPHK1, NRP1, VDR, EGFL7, THBS1, LST1, OSM, NOD2, HTRA1, HLX, SPINT1, TIMP1, PYCARD, LILRB4, CD300A, TNFSF12, CXCL1, GSDME, CLDN5, GRN, AIF1, MAPK11, HES1, GATA2, FES, CCL2, CTBP2, SCIN, ITGAV, FOSL1, CLEC7A, LGMN, IFI30, DAB2, TLR2, LAMC1, VSIG4, N…
GOBP	GOBP_CIRCULATORY_SYSTEM_DEVELOPMENT	7.61544e-08	3.19405e-06	0.704976	0.325783	1.62538	676	ADM, ALOX5, NRG1, CX3CR1, ENG, NIBAN2, CCR2, GLUL, CCM2L, SOD2, EMILIN2, STAB1, HMOX1, SPHK1, NRP1, EGFL7, THBS1, BVES, ANXA3, HK2, SPINT1, TNFRSF1A, TNFSF12, SPI1, MMP19, LDLR, CLDN5, GRN, MAPK11, HES1, GATA2, CCL2, LRP1, ITGAV, ANPEP, FOSL1, DUSP6, NOTCH2, IL18, SERPINE1, LIF, NXN, PRCP, JAG1, TEK, HGF, FN1, SPRED1, CYBB, IL10, KCNQ1, G6PD, GPNMB, C5AR1, C3AR1, CCL8, ITGA2B, SPRY1, TNFRSF1B, EC…
GOBP	GOBP_POSITIVE_REGULATION_OF_INTERLEUKIN_1_PRODUCTION	7.81881e-08	3.26816e-06	0.704976	0.628962	2.35579	54	MEFV, LILRA5, NOD2, PYCARD, STMP1, CLEC7A, CASP1, AZU1, CCL3, LPL, TYROBP, TLR8, TLR4, CD36, NLRC4, TLR6, GSDMD, APP, NLRP3, LILRA2, TMEM106A, NLRP12, MYD88, IL6, TNF, HK1, AIM2, IFI16, STAT3, RIPK2, NLRP1, HAVCR2, HSPB1
GOBP	GOBP_NEGATIVE_REGULATION_OF_INFLAMMATORY_RESPONSE	8.27616e-08	3.44756e-06	0.704976	0.51101	2.12135	98	ALOX5, HCK, FGR, TREM2, MEFV, FCGR2B, NOD2, FPR2, TNFAIP6, TNFRSF1A, LDLR, GRN, METRNL, RHBDF2, TEK, HGF, AOAH, LYN, IL10, SRC, ACOD1, TNFRSF1B, NR1H3, KLF4, YES1, LPCAT3, GSTP1, NLRP3, FFAR4, NLRP12, FURIN, PTPN2, PRKCD, SYK, VPS35, GPX1, GBA, RABGEF1
bioplanet	bioplanet_Signal transduction	8.50048e-08	3.529e-06	0.704976	0.347491	1.7083	491	CCL23, ADM, JAG2, NRG1, CX3CR1, CCR2, HTR7, ITGB5, FPR3, FPR1, GRB10, NRP1, ATP6V0D2, ARAP3, FPR2, COL9A2, ITGAM, CXCL1, DAGLB, GNB4, MAPK11, HES1, FES, CCL2, CCL20, AP2A1, CXCL16, ITGAV, DUSP6, LAMC1, NOTCH2, JAG1, FN1, CCL3, CXCL3, LYN, DAGLA, ATP6V1A, C5AR1, C3AR1, MMP9, ITGA2B, HBEGF, ITSN1, DNM1, ITGA2, CCR1, ATP6V0D1, GNAQ, C5AR2, ATP2A2, ADORA2B, GAB2, CCL7, HIF1A, LATS2, ARHGAP6, CXCL6, E…
GOBP	GOBP_REGULATION_OF_SYSTEM_PROCESS	8.53285e-08	3.53047e-06	0.704976	0.387747	1.82932	286	ADM, TRPM4, PTAFR, TBXAS1, SPHK1, BVES, TNFRSF1A, DOCK4, RETN, AIF1, BAIAP2, CTSC, ENO1, P2RX1, NOL3, DAB2, NPTX2, GUCY1A1, FKBP1B, TIFAB, DOCK5, HGF, CCL3, IL10, KCNQ1, G6PD, SRC, TNFRSF1B, HBEGF, UNC13B, ITGA2, TNFRSF21, NR1H3, IL1A, ATP2A2, GPR35, ADORA2B, DES, BMP6, YWHAE, MDM2, SGK1, PRKACA, LPCAT3, CTTN, APP, SLC8A1, STX1A, CYBA, GSTO1, MYL9, ACP3, NOTCH1, GAS6, GAA, ADRB2, HRH2, EHD3, TMEM…
REACTOME	REACTOME_CHROMATIN_MODIFYING_ENZYMES	8.59634e-08	3.54476e-06	0.704976	-0.376311	-1.96956	195	SUPT20H, BRPF3, ELP5, KANSL2, KANSL1, JADE2, JADE1, KAT14, EHMT2, ING3, KAT6A, SAP30L, MTA3, TADA1, KDM4C, KAT7, BRWD1, KDM3A, MTA2, BRD8, VPS72, KDM2A, TADA2B, UTY, EPC1, SMARCD1, HDAC1, ATF7IP, SUZ12, ARID2, JADE3, HDAC2, SETD2, TAF5L, AEBP2, KAT6B, NSD1, SUV39H2, ELP2, KDM5B, ELP6, ARID4A, NSD3, WDR5, ELP1, SMARCE1, SMARCA2, YEATS4, SGF29, NCOA1, KMT5A, GATAD2B, SUV39H1, ATF2, SETDB2, JMJD6, P…
GOBP	GOBP_ESTABLISHMENT_OF_RNA_LOCALIZATION	9.50562e-08	3.90655e-06	0.704976	-0.428015	-2.13295	128	G3BP2, PHAX, NUP107, NUP160, SENP2, AHCTF1, CPSF6, NUP43, XPOT, NSUN2, TSC1, TGFBR2, ATXN2, THOC3, POLDIP3, SMG5, FYTTD1, POLR2D, UPF2, RAE1, TOMM20, NUP54, NPM1, DHX9, SMG7, PCID2, RFTN1, CHTOP, TERF1, NUP35, NXF1, SETD2, KPNB1, CKAP5, SMG6, AKAP8L, XPO5, ALKBH5, NUP42, ZC3H11A, RTRAF, ATM, XPO1, UPF1, MRPL18, SIDT1, YTHDC1, NOL6, NXT1, NUP88, NUP155, PNPT1, SNUPN, RANBP2, NUP62, RAN, DDX39A, NU…
REACTOME	REACTOME_TRANSPORT_OF_MATURE_TRANSCRIPT_TO_CYTOPLASM	9.63019e-08	3.94451e-06	0.704976	-0.524214	-2.33231	70	NUP107, NUP160, CASC3, NUP43, SRSF6, WDR33, SRSF2, THOC3, EIF4A3, POLDIP3, FYTTD1, RAE1, NUP54, SRSF5, CHTOP, NUP35, NXF1, SRRM1, NUP42, ZC3H11A, RBM8A, SLU7, NXT1, NUP88, NUP155, RANBP2, NUP62, CPSF4, DDX39A, NUP133, NUP210, UPF3B, GLE1, ALYREF
GOBP	GOBP_POSITIVE_REGULATION_OF_CELL_DIFFERENTIATION	1.00216e-07	4.09116e-06	0.704976	0.338381	1.66674	536	ADM, NRG1, CX3CR1, TRPM4, ENG, NIBAN2, SOD2, VNN1, CYFIP1, TREM2, LGALS3, NRP1, VDR, MSR1, HLX, SPINT1, LILRB4, CLDN5, MAPK11, HES1, GATA2, FES, BAIAP2, MTCH2, SCIN, CLEC7A, DAB2, TLR2, METRNL, PLXNB2, NOTCH2, IL18, SERPINE1, LIF, JAG1, DOCK5, TSPO, TRIB1, HGF, FN1, LYN, IL10, LPL, CLIC1, SDCBP, SS18L1, TYROBP, PRKCI, TNFRSF1B, NPTN, SPAG9, CD36, SOCS2, CEBPD, CCR1, PLXNC1, VSIR, PF4, ZNF703, CEB…
GOBP	GOBP_ASTROCYTE_DIFFERENTIATION	1.06551e-07	4.2962e-06	0.704976	0.617777	2.27467	52	S100A9, TREM2, S100A8, FPR2, LDLR, GRN, HES1, LRP1, LIF, C5AR1, TLR4, CDK6, GFAP, APP, IFNGR1, IL1B, NOTCH1, VIM, LAMB2, TTBK1, IL6, TNF, PSEN1, SERPINE2, STAT3, MAPK3
GOBP	GOBP_DETECTION_OF_MOLECULE_OF_BACTERIAL_ORIGIN	1.06642e-07	4.2962e-06	0.704976	0.9443	2.18312	8	TREM2, NOD2, LY96, TLR2, TLR4, TLR6, TLR1
GOBP	GOBP_ORGANIC_HYDROXY_COMPOUND_TRANSPORT	1.06067e-07	4.2962e-06	0.704976	0.476599	2.0645	136	CLU, ABCG4, EMB, AQP3, AQP9, TREM2, ABCC4, MSR1, LDLR, LRP1, P2RX1, DAB2, TSPO, SOAT1, KCNQ1, ABCC3, NPC2, CD36, SLCO2B1, TPCN2, SLC16A3, NR1H3, AKR1C1, RXRA, BMP6, TTC39B, LPCAT3, ANXA2, STX1A, P2RY1, FURIN, STARD5, SYK, YJEFN3, SLC18A2, SPP1, OSBPL1A, LAMTOR1, ABCA7, SYT11, APOE, SREBF2, ABCA1, ACTB, NUS1, SLC5A11, ABCC2, SCP2, NPC1
GOBP	GOBP_REGULATION_OF_RESPONSE_TO_STRESS	1.05723e-07	4.2962e-06	0.704976	0.30229	1.52586	969	CLU, ALOX5, CD9, S100A12, S100A9, PTGES, CCR2, TFPI, SOD2, HCK, VNN1, FGR, EMILIN2, TREM2, S100A8, MEFV, PLAU, LILRA5, ALOX5AP, SBNO2, FCGR2B, NECTIN2, SPHK1, STING1, ZCWPW1, THBS1, OSM, NOD2, HTRA1, FPR2, MCTP1, TNFAIP6, CASP4, PYCARD, CARD9, TNFRSF1A, SPI1, DAGLB, LDLR, GRN, FCN1, ZYX, FGL2, IRAK3, CTSC, ENO1, CLEC7A, NOL3, NAIP, TLR2, METRNL, VSIG4, CASP1, RHBDF2, IL18, FKBP1B, SERPINE1, LTBR,…
GOBP	GOBP_TRNA_MODIFICATION	1.07426e-07	4.31361e-06	0.704976	-0.522698	-2.34156	74	TRMT12, ELP5, TRMT61A, MTO1, MOCS3, THUMPD1, NSUN2, LCMT2, NSUN6, METTL8, DTWD2, TRMT10C, THUMPD2, OSGEPL1, TRMT5, NAT10, PUS10, QTRT2, ELP1, TRMT11, CDK5RAP1, CTU1, TRMT1L, ALKBH1, ALKBH8, ELP3, THG1L, TRMU, TRMT61B, TRMT44, CDKAL1, PUS7, AARS2, NSUN3, DUS3L, THUMPD3, WDR4, TRIT1, TRDMT1, PUS3, TRMT10B, TYW5, GTPBP3, TRMT10A
GOBP	GOBP_RNA_METHYLATION	1.0954e-07	4.38409e-06	0.704976	-0.533438	-2.36313	69	TRMT12, TRMT61A, MTO1, VIRMA, RAMAC, NSUN2, METTL14, CBLL1, LCMT2, NSUN6, METTL8, CMTR2, TRMT10C, PCIF1, THUMPD2, MEPCE, TRMT5, CMTR1, TRMT11, TRMT1L, MRM3, ALKBH8, METTL16, FTSJ3, TRMT61B, TRMT44, METTL5, WTAP, RBM15, NSUN3, THUMPD3, WDR4, METTL4, METTL15, TRDMT1, TRMT2A, TRMT10B, NOP2, GTPBP3, TRMT10A, DIMT1, TRMT13, NSUN5, TFB1M, EMG1, TRMT2B
GOBP	GOBP_REGULATION_OF_CYSTEINE_TYPE_ENDOPEPTIDASE_ACTIVITY	1.16271e-07	4.63619e-06	0.704976	0.444255	1.98664	169	S100A9, S100A8, MEFV, PLAUR, THBS1, CTSD, DAPK1, CASP4, PYCARD, CARD9, P2RX1, CLEC7A, LGMN, NOL3, NAIP, CASP1, HGF, SRC, MMP9, NLRC4, VEGFA, KLF4, F3, NLRP3, HIP1, ACER2, APAF1, PRDX5, NLRP12, GAS6, PRDX3, GSN, SYK, TTBK1, IFT57, GPX1, TNF, AIM2, IFI16, CDKN2D, DELE1, POR, ANP32B, PSMB9, MTCH1, PTGS2, MICAL1, CD44, SFN, CAST, RIPK2, AKT1, BAD, CTSH, NLRP1, ARRB2, DAP, CASP5, BID, IFI6, LAMTOR5, M…
bioplanet	bioplanet_Selenium pathway	1.16724e-07	4.63619e-06	0.704976	0.677457	2.35872	39	ALOX5, SOD2, ALOX5AP, LDLR, CCL2, SERPINE1, CTH, KYNU, MTHFR, IL1B, PRDX5, ICAM1, PRDX3, IL6, TNF, INSR, PNPO, PRDX1, PTGS2, GSR, ABCA1, CAT, MPO
GOBP	GOBP_TISSUE_DEVELOPMENT	1.16974e-07	4.63619e-06	0.704976	0.295266	1.49317	1084	MYH14, ADM, JAG2, ALOX5, NRG1, WLS, MYO7A, TRPM4, ENG, NIBAN2, AQP3, CSTA, HCK, SNX10, FGR, ITGB5, FAM20A, LGALS3, ADAMTSL4, SBNO2, NRP1, VDR, BVES, CTSB, BNC2, PSAP, HLX, UGCG, SPINT1, TIMP1, S100A4, ITGAM, TNFRSF1A, SPI1, CLDN5, VCL, CD151, MAPK11, HES1, SCIN, ITGAV, PLOD1, DAB2, LAMC1, PLXNB2, SPTLC2, NOTCH2, ASAH1, SERPINE1, LIF, JAG1, FLOT1, MAFG, HGF, FN1, CCL3, SPRED1, IL10, KCNQ1, DZIP1L,…
GOBP	GOBP_RESPONSE_TO_METAL_ION	1.23685e-07	4.88636e-06	0.690132	0.421659	1.93099	210	AQP3, SOD2, AQP9, S100A8, HMOX1, ALOX5AP, THBS1, CYBRD1, KCNMB1, HFE, LGMN, CD14, TSPO, CYBB, G6PD, MMP9, PLSCR1, TCIRG1, NUDT1, CEBPA, CPNE2, IL1A, LTA4H, MT1X, HIF1A, BMP6, MT2A, NCF1, IQGAP1, APP, CAPN3, ANXA11, SLC25A24, MAP1LC3A, SORD, ADAM9, ACTA1, PAM, PPP2CB, CALM3, TRPM2, PPIF, ACTG1, NCSTN, NFE2L2, MT1E, MCOLN1, RYR1, SLC30A1, ALAD, ATP5F1D, SYT11, ERCC1, SUCNR1, NDRG1, PPP1CA, PTGS2, M…
GOBP	GOBP_MAINTENANCE_OF_LOCATION	1.27105e-07	5.00531e-06	0.690132	0.407589	1.8942	235	S100A9, TREM2, S100A8, LCN2, MSR1, HK2, SCIN, ITGAV, NOL3, TMSB10, FKBP1B, B4GALNT1, TSPO, CCL3, LYN, SOAT1, IL10, DGAT2, LPL, CD36, TPCN2, NR1H3, PRKACA, TTC39B, LTBP1, SLC8A1, IL1B, GP1BA, SLC8B1, CYBA, FTL, CAPN3, GSTO1, GP9, ERO1A, HEXB, GAA, PTPN2, PLIN2, C3, GSN, TMEM38B, CALM3, TRPM2, DGAT1, CCDC22, YWHAB, HTT, CHD7, SLC18A2, IL6, RNF213, TNF, JSRP1, ARHGAP21, CDK5, PSEN1, GBA, MCOLN1, KDE…
REACTOME	REACTOME_CELL_SURFACE_INTERACTIONS_AT_THE_VASCULAR_WALL	1.35106e-07	5.30333e-06	0.690132	0.506359	2.10204	98	SELP, MERTK, SLC7A7, MMP1, ITGAM, ITGAV, TEK, FN1, LYN, THBD, SDC3, SRC, FCER1G, PF4V1, PF4, SLC16A3, YES1, CEACAM5, SLC7A8, OLR1, GAS6, TNFRSF10A, ATP1B3, ESAM, SDC2, ITGAX, TREM1, PROS1, SELPLG, ITGB2, CD177, SPN, PPIA, PTPN6, CD58, PIK3CB, CD44, JAML, SLC7A11, SOS1, SLC7A9, GP6, TNFRSF10B, SLC7A5, L1CAM, ITGB1, ITGA5, DOK2, SHC1, CD74, GRB2
GOBP	GOBP_GLIAL_CELL_MIGRATION	1.3838e-07	5.4145e-06	0.690132	0.688885	2.30861	34	CX3CR1, CD9, CCR2, TREM2, CCL2, TSPO, AZU1, CCL3, P2RY12, P2RY1, HEXB, MBOAT7, RTN4, DISC1, SYNE2, CDK5, CERS2, ZMIZ1, SRGAP2, P2RX4
PID	PID_AMB2_NEUTROPHILS_PATHWAY	1.44539e-07	5.61957e-06	0.690132	0.686089	2.32287	35	HCK, SELP, FGR, PLAU, PLAUR, ITGAM, LRP1, LYN, SRC, MMP9, YES1, ICAM1, TLN1, MMP2, IL6, TNF, SELPLG, ITGB2, AKT1, RAP1A
bioplanet	bioplanet_Alpha-M beta-2 integrin signaling	1.44539e-07	5.61957e-06	0.690132	0.686089	2.32287	35	HCK, SELP, FGR, PLAU, PLAUR, ITGAM, LRP1, LYN, SRC, MMP9, YES1, ICAM1, TLN1, MMP2, IL6, TNF, SELPLG, ITGB2, AKT1, RAP1A
GOBP	GOBP_LIPOPOLYSACCHARIDE_MEDIATED_SIGNALING_PATHWAY	1.46014e-07	5.65896e-06	0.690132	0.61346	2.25877	52	PTAFR, HCK, SPI1, CCL2, LY96, TLR2, IL18, CD14, TRIB1, CCL3, LYN, CD180, ACOD1, TLR4, CD36, SCIMP, SASH1, BMP6, TRIM5, IL1B, LILRA2, MYD88, TICAM1, TNF, MTDH, MAPK3, RIPK2, AKT1
bioplanet	bioplanet_Malaria	1.56394e-07	6.04212e-06	0.690132	0.67623	2.29258	36	SELP, THBS1, CCL2, LRP1, TLR2, IL18, HGF, IL10, SDC3, TLR4, CD36, COMP, IL1B, MYD88, ICAM1, SDC2, IL6, TNF, ITGB2, CXCL8
GOBP	GOBP_ASTROCYTE_ACTIVATION	1.60112e-07	6.16634e-06	0.690132	0.813948	2.37278	18	TREM2, FPR2, LDLR, GRN, LRP1, C5AR1, APP, IFNGR1, IL1B, TTBK1, IL6, TNF, PSEN1
WP	WP_PROSTAGLANDIN_SYNTHESIS_AND_REGULATION	1.60924e-07	6.17818e-06	0.690132	0.717336	2.30824	28	PTGES, TBXAS1, ABCC4, ANXA3, PTGER2, ANXA5, AKR1C1, CBR1, S100A6, ANXA2, PTGIR, PTGDS, MITF, PPARGC1B, ANXA4, PLA2G4A, HSD11B1, PTGS2, EDN1, S100A10
REACTOME	REACTOME_FORMATION_OF_FIBRIN_CLOT_CLOTTING_CASCADE	1.61811e-07	6.19282e-06	0.690132	0.756958	2.40816	25	TFPI, F13A1, VWF, PRCP, THBD, PF4V1, PF4, F3, GP1BA, GP9, PROS1, CD177, SERPINE2, SERPING1
GOBP	GOBP_REGULATION_OF_RNA_SPLICING	1.6362e-07	6.24252e-06	0.690132	-0.42906	-2.12442	121	AKAP17A, SF1, HNRNPU, RBM5, RBM38, CLK4, SF3B4, SRSF6, SLC38A2, SRSF2, RBFOX2, CLK3, DAZAP1, HNRNPK, RBM7, SRSF5, MBNL1, CWC22, SETX, PTBP2, NCL, SRRM1, CELF1, HNRNPLL, DYRK1A, RBM8A, RBMXL1, YTHDC1, SNRNP70, FAM172A, JMJD6, CLK1, METTL16, RBM39, TRA2B, SRSF10, WTAP, SAP18, REST, ERN1, CLK2, RBM15, MBNL3, PRPF19, DDX5, PRDX6, SRPK2, SNW1, MBNL2, RRP1B, METTL4, SON, GRSF1, HSPA8, SRSF1, KHDRBS1
GOBP	GOBP_REGULATION_OF_REGULATED_SECRETORY_PATHWAY	1.74354e-07	6.63139e-06	0.690132	0.52645	2.14855	90	PTAFR, RAB3D, CCR2, ADGRE2, FGR, HMOX1, FCGR2B, ITGAM, CD300A, SPI1, GATA2, FES, P2RX1, SEPTIN5, LYN, PRAM1, ATP2A2, ADORA2B, GAB2, SYN1, STX1A, P2RY1, CBARP, RIMS3, NOTCH1, APBA1, CALM3, RAB27A, SYK, LAMP1, CDK5, RABGEF1, STXBP2, ITGB2, CD177, SYT11, SCAMP5, MICAL1, RAP1A, HYAL3
WP	WP_MICROGLIA_PATHOGEN_PHAGOCYTOSIS_PATHWAY	1.76093e-07	6.67683e-06	0.690132	0.685493	2.29725	34	FCGR1A, HCK, TREM2, NCF2, ITGAM, NCF4, CYBB, LYN, TYROBP, FCER1G, C1QB, C1QC, NCF1, CYBA, SYK, TREM1, ITGB2, PTPN6, VAV3, PIK3CB
GOBP	GOBP_PRODUCTION_OF_MOLECULAR_MEDIATOR_INVOLVED_IN_INFLAMMATORY_RESPONSE	1.8353e-07	6.93732e-06	0.690132	0.579738	2.21623	64	ALOX5, TREM2, MEFV, ALOX5AP, NOD2, PYCARD, CARD9, LILRB4, GRN, P2RX1, CLEC7A, SERPINE1, LYN, TLR4, CD36, TLR6, HIF1A, NCF1, EPHB2, MYD88, TICAM1, SYK, IL1R2, IL6, TNF
GOBP	GOBP_PROTEIN_ACETYLATION	1.94309e-07	7.32216e-06	0.690132	-0.374129	-1.92559	174	NFYA, BRPF3, NAP1L2, NAA30, KANSL2, TAF1, KANSL1, JADE2, PBXIP1, SIRT1, JADE1, PRKAA1, KAT14, ING3, KAT6A, APBB1, TADA1, GATA3, KAT7, MAP3K7, SMAD4, PER1, GSK3B, BRD8, VPS72, SOX4, FOXO1, TADA2B, EPC1, GTF3C4, AUTS2, NAA16, DDX3X, KLF15, JADE3, HDAC2, TERF2IP, TAF5L, ARNTL, KAT6B, DIP2B, CRTC2, TAF7, DIP2A, NAT10, WDR5, NFYB, LEF1, POLE3, YEATS4, CTCF, SGF29, NCOA1, LDB1, THAP7, ATF2, PYGO2, TAF5…
REACTOME	REACTOME_SUMOYLATION_OF_DNA_DAMAGE_RESPONSE_AND_REPAIR_PROTEINS	1.9639e-07	7.37787e-06	0.690132	-0.525019	-2.29757	66	XPC, STAG1, NUP107, NUP160, NUP43, STAG2, PHC3, RAD21, BLM, PIAS1, PHC1, RAE1, NUP54, PHC2, PIAS2, HDAC7, CBX8, NUP35, NUP42, CBX4, NUP88, MDC1, NUP155, NSMCE4A, SCMH1, RANBP2, NUP62, NUP133, NUP210
GOBP	GOBP_IMPORT_ACROSS_PLASMA_MEMBRANE	1.97166e-07	7.38437e-06	0.690132	0.509994	2.11369	101	TRPM4, SLC47A1, SLC46A1, THBS1, SLC1A3, SLC39A4, SLC22A4, HFE, P2RX1, KCNQ1, ACSL1, CD36, SLC43A2, SLC2A5, SLC6A6, SLC6A9, SLC36A4, GFAP, SLC8A1, SLC7A8, SLC15A3, ATP1B3, SLC1A2, TRPM2, FOLR2, KCNJ2, TNF, RGS2, PSEN1, SLC30A1, SLC1A5, SLC12A9, ATP1A1, AKT1, SLC7A11, SLC36A1, KCNK5, SLC9A1, CLN8, ACSL5, SLC7A5
GOBP	GOBP_COLLAGEN_CATABOLIC_PROCESS	2.04787e-07	7.64643e-06	0.690132	0.770179	2.36917	23	CTSB, MMP1, MMP19, CTSL, CTSS, MMP9, VSIR, MMP25, MRC2, CST3, ADAM15, FURIN, PEPD, MMP2
GOBP	GOBP_CHROMOSOME_SEGREGATION	2.0926e-07	7.78968e-06	0.690132	-0.321966	-1.75552	276	RIOK2, TLK1, CHAMP1, SMARCA5, CDC23, STAG1, HNRNPU, PIBF1, MIS12, TERB1, TLK2, WAPL, NUP43, STAG2, HJURP, RAD18, EHMT2, MRE11, RAD21, BUB3, NUMA1, PUM1, ZW10, TOP2B, EME1, UVRAG, FANCM, DSN1, EML3, ERCC4, AXIN2, LATS1, SPICE1, CUL3, CDC26, PTTG1, PCID2, NR3C1, PDS5B, TERF1, DDX3X, BEX4, PDS5A, MAU2, KPNB1, TOP3B, SFPQ, ZNF207, MAD2L1BP, AKAP8L, VPS4B, KIF22, NDEL1, BOD1, ATM, ANKRD31, SLX4, APC, …
WP	WP_IL1_AND_MEGAKARYOCYTES_IN_OBESITY	2.18554e-07	8.111e-06	0.690132	0.769286	2.36642	23	S100A9, TIMP1, CCL2, TLR2, IL18, IL1R1, MMP9, HBEGF, TLR1, IL1B, NLRP3, MYD88, ICAM1, PLA2G7
GOBP	GOBP_POSITIVE_REGULATION_OF_SECRETION	2.2719e-07	8.40603e-06	0.690132	0.434512	1.95707	184	WLS, TRPM4, PTGES, PTAFR, RAB3D, P2RY2, GLUL, FGR, TREM2, S100A8, ITGAM, RETN, GATA2, HFE, SCIN, DAB2, TLR2, GPR27, TNFRSF11A, SDCBP, FRMD4A, UNC13B, TLR4, ANG, IL1A, ADORA2B, GAB2, HIF1A, BMP6, TCF7L2, STX1A, IL1B, CYBA, P2RY1, FFAR4, CHMP2A, ADAM9, ADAM8, MYH10, RAB27A, TRPM2, SYK, LAMP1, APBB3, VPS35, SPP1, CDK5, RAB27B, ITGB2, CD177, ACSL4, PPIA, SRI, PLA2G4A, SCAMP5, PCK2, SMPD3, HYAL3, BAD,…
GOBP	GOBP_GLIAL_CELL_DIFFERENTIATION	2.31832e-07	8.54764e-06	0.690132	0.459616	1.99687	138	CLU, NRG1, S100A9, TREM2, S100A8, FPR2, SPINT1, LDLR, GRN, HES1, LRP1, TLR2, LIF, B4GALT5, LYN, C5AR1, TNFRSF1B, TLR4, TNFRSF21, CDK6, GFAP, APP, IFNGR1, IL1B, GPR157, NOTCH1, VIM, PLEC, LAMB2, TTBK1, IL6, NCSTN, TNF, CDK5, PSEN1, GBA, ARHGEF10, PARD3, SERPINE2, EGR2, ILK, SIRT2, STAT3, NDRG1, WDR1
GOBP	GOBP_POSITIVE_REGULATION_OF_NF_KAPPAB_TRANSCRIPTION_FACTOR_ACTIVITY	2.32413e-07	8.54764e-06	0.690132	0.48068	2.04741	123	CLU, CX3CR1, S100A12, S100A9, S100A8, SPHK1, NOD2, PYCARD, CARD9, IL1RAP, IRAK3, CLEC7A, TLR2, IL18, FLOT1, TNFRSF11A, PRKCI, TLR4, CD36, NLRC4, TLR6, CTH, TRIM5, APP, IL1B, NLRP3, CAPN3, MYD88, TICAM1, PRDX3, ADAM8, CIB1, IL6, TNF, MTDH, AIM2, PPIA, RPS6KA4, STAT3, BTK, IL18RAP, SLCO3A1, MTPN, RIPK2
GOBP	GOBP_INTEGRIN_MEDIATED_SIGNALING_PATHWAY	2.35591e-07	8.63857e-06	0.690132	0.533671	2.1231	79	HCK, FGR, ITGB5, NRP1, TIMP1, ITGAM, ZYX, ITGAV, DAB2, MPIG6B, FN1, SRC, ITGA2B, ITGA2, PRAM1, ITGA9, CTNNA1, LOXL3, PLEK, ADAM15, FERMT3, ADAM9, TLN1, SYK, ITGB1BP1, ITGAX, ITGB2, PTK2, CD177, ILK, VAV3, LIMS2, TEC
GOBP	GOBP_CELLULAR_RESPONSE_TO_NITROGEN_COMPOUND	2.50129e-07	9.14425e-06	0.674963	0.345227	1.68773	458	TRPM4, PTAFR, P2RY2, HTR7, AQP9, CYFIP1, TREM2, GRB10, GUCY1B1, FCGR2B, RAB31, STING1, SLC1A3, NOD2, FPR2, CASP4, AIF1, BAIAP2, LRP1, AGTRAP, LGMN, RRAGC, FLOT1, SH2B2, CYBB, PTPRE, LYN, KCNQ1, SRC, LPL, PTPN1, PRKCI, P2RY12, TLR4, CD36, PXN, SOCS2, RAB13, GNAQ, TLR6, PLCB1, TREX1, LAMTOR2, MDM2, PRKACA, CTNNA1, CEBPB, CASP6, RHOQ, APP, SLC8A1, EPHB2, PID1, IL1B, CYBA, P2RY1, GNA15, CYP1B1, RAB10…
GOBP	GOBP_SPHINGOLIPID_METABOLIC_PROCESS	2.54345e-07	9.27071e-06	0.674963	0.493567	2.08822	114	ALDH3B1, SPTSSA, SPHK1, PSAP, UGCG, SMPDL3A, HACD4, P2RX1, SPTLC2, ASAH1, B4GALNT1, B4GALT5, PLA2G15, SERINC5, ELOVL7, ACER2, PPT1, FUT7, NAGA, A4GALT, SGMS2, HEXB, PRKCD, ENPP2, GLB1, HEXA, GBA, SMPD2, ST8SIA4, CERS2, PPM1L, HACD2, GLTP, SMPD3, ST6GALNAC4, ST3GAL2, CERKL, PLA2G6, CLN8, ST6GALNAC3, CERK, SUMF1, GLA, ORMDL2, GM2A, B3GALT4, LARGE1, PPP2R1A, CPTP, SMPD4, BAX, B4GALT4, PLPP1, NEU1, A…
REACTOME	REACTOME_RNA_POLYMERASE_II_TRANSCRIPTION_TERMINATION	2.61587e-07	9.5064e-06	0.674963	-0.551147	-2.32913	56	ZNF473, CSTF2T, CPSF7, CASC3, SRSF6, WDR33, SRSF2, THOC3, EIF4A3, POLDIP3, FYTTD1, CLP1, NUDT21, SRSF5, CSTF1, CHTOP, CSTF3, PAPOLA, SRRM1, ZC3H11A, RBM8A, SLU7
GOBP	GOBP_CELL_ADHESION_MEDIATED_BY_INTEGRIN	2.66775e-07	9.66626e-06	0.674963	0.590335	2.25149	60	ITGB5, PLAU, ITGAM, ITGAV, SERPINE1, LIF, LYN, ITGA2B, P2RY12, ITGA2, ITGA9, ACER2, CYP1B1, FERMT3, DPP4, ICAM1, ADAM9, SYK, CIB1, LPXN, ITGB1BP1, ITGAX, ADAM17, ITGB2, PTK2, PTPN6, PODXL, PIEZO1, NCKAP1L, CRK, EFNA1, ITGB1, ITGA5
GOBP	GOBP_POSITIVE_REGULATION_OF_GENE_EXPRESSION	2.69689e-07	9.74303e-06	0.674963	0.311674	1.56099	753	CLU, TLR5, BATF, NRG1, PTAFR, ENG, CCR2, FGR, TNFRSF8, TREM2, MEFV, HMOX1, LILRA5, SPHK1, STING1, VDR, SLC11A1, THBS1, OSM, NOD2, PYCARD, CARD9, SPI1, LDLR, CLDN5, FCN1, AIF1, PLD1, MAPK11, HES1, GATA2, IL1RAP, IRAK3, HFE, LY96, BCL3, ENO1, STMP1, CLEC7A, TLR2, CASP1, PLXNB2, IL18, SERPINE1, LIF, CD14, NFIL3, IL1R1, AZU1, FLOT1, MAFG, HGF, FN1, NFAM1, CCL3, CYBB, IL10, SRC, C5AR1, LPL, C3AR1, PLS…
GOBP	GOBP_TRNA_PROCESSING	2.75305e-07	9.91666e-06	0.674963	-0.439175	-2.12837	108	TRMT12, ELP5, TRMT61A, MTO1, MOCS3, THUMPD1, NSUN2, ELAC1, RPP38, CLP1, LCMT2, NSUN6, METTL8, DTWD2, TP53RK, TRMT10C, THUMPD2, RTRAF, OSGEPL1, TRMT5, TSEN54, NAT10, PUS10, POP1, QTRT2, ELP1, RPP21, TRMT11, CDK5RAP1, CTU1, TRMT1L, ALKBH1, ALKBH8, ELP3, THG1L, TRMU, TRMT61B, DDX1, TRMT44, CDKAL1, ADAT3, RPP14, POP4, PUS7, AARS2, NSUN3, DUS3L, THUMPD3, WDR4, TSEN15, GRSF1, TRNT1, TRIT1, TRDMT1, PUS3…
WP	WP_NRF2_PATHWAY	2.85232e-07	1.02441e-05	0.674963	0.545285	2.15454	77	NRG1, SERPINA1, ABCC4, HMOX1, SLC39A4, BLVRB, MAFG, HGF, G6PD, SLC39A1, MGST2, PGD, ABCC3, HBEGF, SRXN1, SLC2A6, SLC2A5, CBR1, SLC6A6, SLC6A9, RXRA, GSTP1, FTL, MGST3, SLC2A14, NFE2L2, PRDX1, TXNRD1, SLC2A8, GSR, KEAP1, SLC7A11, SLC5A11, ABCC2, GCLM
REACTOME	REACTOME_ANTIMICROBIAL_PEPTIDES	2.87227e-07	1.02856e-05	0.674963	0.811168	2.31699	17	CLU, S100A9, CCR2, S100A8, LCN2, SLC11A1, TLR2, RNASE6, LYZ, TLR1, PDZD11, CAMP, ATOX1
GOBP	GOBP_PEPTIDYL_LYSINE_MODIFICATION	2.96582e-07	1.05642e-05	0.674963	-0.310555	-1.72029	315	METTL18, NFYA, BRPF3, NAP1L2, GFI1, KANSL2, TAF1, KANSL1, JADE2, PBXIP1, SIRT1, JADE1, SENP2, PRKAA1, UHRF2, KAT14, SENP7, ZNF274, EHMT2, TOPORS, ING3, KAT6A, RIF1, APBB1, SMYD5, TADA1, GATA3, KDM4C, KAT7, MAP3K7, NELFA, MUL1, SMAD4, PER1, EZH1, KDM3A, BRD8, VPS72, PIAS1, SOX4, SETD4, PHF1, TADA2B, CSKMT, EPC1, N6AMT1, GTF3C4, PIAS2, HDAC7, AUTS2, HMG20A, ZNF304, LIPT2, WDR82, SENP6, KLF15, JADE3…
GOBP	GOBP_REGULATION_OF_METAL_ION_TRANSPORT	2.96733e-07	1.05642e-05	0.674963	0.408163	1.88975	222	TREM2, STOM, LGALS3, LILRA5, SLC31A2, HES1, CCL2, KCNMB1, HFE, P2RX1, FKBP1B, TSPO, CCL3, LYN, KCNQ1, G6PD, CCR1, GEM, VMP1, STAC3, MYLK, GPR35, SLC6A9, WFS1, YWHAE, PRKACA, SLC8A1, SLC8B1, CYBA, CBARP, CAPN3, LILRA2, GSTO1, BEST1, ADRB2, ATP1B3, EHD3, TMEM38B, SCN1B, CALM3, SESTD1, TMBIM6, KCNJ2, HTT, CHD7, JSRP1, RNF207, CDK5, CRACR2B, VDAC1, GLRX, SLC30A1, P2RY6, FKBP1A, SERPINE2, CNKSR3, PTPN…
GOBP	GOBP_APOPTOTIC_CELL_CLEARANCE	3.07749e-07	1.08931e-05	0.674963	0.669084	2.26835	36	MARCO, CCR2, TREM2, THBS1, MERTK, FCN1, CCL2, LRP1, CD300LF, ITGAV, TYROBP, CD36, NR1H3, TREX1, GAS6, C3, RHOG, ABCA7, TGM2, PEAR1, FCN2
GOBP	GOBP_SUPEROXIDE_ANION_GENERATION	3.07206e-07	1.08931e-05	0.674963	0.69815	2.2911	30	SOD2, NCF2, FPR2, ITGAM, CLEC7A, NCF4, CYBB, TYROBP, ALOX12, NCF1, GSTP1, CYBA, PRKCD, SYK, ITGB2, CD177, EDN1, SH3PXD2B
REACTOME	REACTOME_CROSS_PRESENTATION_OF_PARTICULATE_EXOGENOUS_ANTIGENS_PHAGOSOMES	3.14981e-07	1.1085e-05	0.674963	0.936406	2.16487	8	ITGB5, NCF2, ITGAV, NCF4, CYBB, CD36, NCF1, CYBA
bioplanet	bioplanet_Cross-presentation of particulate exogenous antigens (phagosomes)	3.14981e-07	1.1085e-05	0.674963	0.936406	2.16487	8	ITGB5, NCF2, ITGAV, NCF4, CYBB, CD36, NCF1, CYBA
REACTOME	REACTOME_EPH_EPHRIN_SIGNALING	3.17584e-07	1.11446e-05	0.674963	0.554911	2.15816	70	MYH14, AP2A1, LYN, SRC, MMP9, SDCBP, ITSN1, DNM1, MYL12B, YES1, EPHB2, ARPC3, CFL1, MYL9, PAK1, MYH10, PSENEN, MMP2, SDC2, ACTG1, NCSTN, CLTB, PSEN1, LIMK2, LIMK1, PTK2, VAV3, AP2M1, AP2S1, AP2A2, ACTB, ARPC2, RHOA, EFNA1, AP2B1, MYL6, CLTC, NCK2, PAK3, PSEN2, CLTA, ACTR2, ACTR3, APH1A, APH1B
GOBP	GOBP_PROTEIN_DNA_COMPLEX_SUBUNIT_ORGANIZATION	3.3918e-07	1.18684e-05	0.674963	-0.38005	-1.93	163	BRD2, SMARCA5, TSPYL2, NAP1L2, TSPYL1, TAF1, ACTR8, MIS12, HJURP, KAT6A, SPTY2D1, CAND1, BRF2, TBP, NFRKB, VPS72, TSPYL4, CHRAC1, GRWD1, UBTF, SMARCD1, NPM1, TAF8, ASF1A, TERF1, ATF7IP, PAF1, ARID2, SENP6, SETD2, SART3, THRA, TP53, KAT6B, TAF11, TAF7, NAP1L5, CENPP, CENPC, ACTR5, BRF1, SMARCE1, RAD51C, POLE3, DNAJC9, CTCF, PIWIL1, TSPYL5, SHPRH, TAF5, SUPT16H, TCF4, MIS18A, TAF6L, POGZ, TAF2, TAF…
GOBP	GOBP_POSITIVE_REGULATION_OF_CELL_DEATH	3.48629e-07	1.21433e-05	0.674963	0.351076	1.7002	410	CLU, ADM, S100A9, SOD2, EMILIN2, TNFRSF8, S100A8, HMOX1, ADAMTSL4, FCGR2B, VDR, THBS1, UBE2M, CTSD, HTRA1, DAPK1, PYCARD, ITGAM, TNFRSF1A, TNFSF12, GSDME, GRN, CCL2, MTCH2, SCIN, CTSC, LRP1, FOSL1, CLEC7A, DUSP6, G0S2, NOTCH2, LTBR, TSPO, NACC2, CCL3, MAP3K20, LYN, IL10, SRC, PHLDA1, MMP9, TYROBP, PRKCI, TNFRSF1B, UNC13B, TLR4, CD36, NLRC4, TLR6, MAP3K11, OLFM1, STK3, SLC6A6, LATS2, ATG7, CTNNA1,…
GOBP	GOBP_POSITIVE_REGULATION_OF_IMMUNE_RESPONSE	3.49019e-07	1.21433e-05	0.674963	0.356904	1.7191	378	CLU, PTAFR, CCR2, HCK, FGR, TREM2, FPR3, FPR1, LGALS3, FCGR2B, NECTIN2, STING1, SLC11A1, NOD2, FPR2, HLX, PYCARD, ITGAM, CARD9, LILRB4, CD300A, SPI1, FCN1, GATA2, CLEC7A, VSIG4, IL18, IL1R1, COCH, NFAM1, SH2B2, LYN, IL10, SRC, C5AR1, ACOD1, C3AR1, PLSCR1, TYROBP, FCER1G, TNFSF13B, TLR8, TLR4, NLRC4, CFP, TNFRSF21, C1QB, PRAM1, C5AR2, TREX1, ADORA2B, MYB, GAB2, C1QC, CMKLR1, TRIM5, CFD, YES1, CD5L…
GOBP	GOBP_RESPONSE_TO_AMYLOID_BETA	3.88123e-07	1.34656e-05	0.674963	0.663618	2.31054	39	TREM2, FCGR2B, FPR2, CASP4, LRP1, LGMN, MMP9, TLR4, CD36, TLR6, APP, EPHB2, ADRB2, ICAM1, ABCC1, MMP2, TNF, CDK5, PSEN1
GOBP	GOBP_REGULATION_OF_VASCULATURE_DEVELOPMENT	3.98882e-07	1.37998e-05	0.674963	0.428215	1.92613	183	ADM, ALOX5, CX3CR1, ENG, NIBAN2, CCR2, GLUL, EMILIN2, STAB1, HMOX1, SPHK1, NRP1, THBS1, ANXA3, HK2, TNFSF12, CLDN5, GRN, GATA2, SERPINE1, TEK, HGF, SPRED1, CYBB, IL10, GPNMB, C5AR1, C3AR1, ECM1, SASH1, PF4, SEMA4A, VEGFA, IL1A, KLF4, HIF1A, F3, SPARC, IL1B, CYP1B1, C3, RHOB, CAMP, PGK1, RRAS, ENPP2, AGO2, YJEFN3, SPRY2, IL6, NFE2L2, ITGAX, TNF, RAMP2
GOBP	GOBP_RRNA_METABOLIC_PROCESS	4.01552e-07	1.3853e-05	0.674963	-0.344222	-1.83233	229	RIOK2, METTL18, SBDS, SLFN13, RSL1D1, ABT1, GTF3C5, WBP11, MAK16, ERI1, PELO, URB1, LAS1L, DDX10, EIF4A3, SHQ1, HELQ, BRIX1, TSR2, UTP14C, RPP38, NOL11, UTP4, MTERF4, YTHDF2, IMP3, ERI2, GTF3C4, DROSHA, GTF3A, SNU13, GTF3C2, EXOSC9, MRPL44, NCL, EXOSC4, UTP18, ZNHIT3, TP53, NGDN, DEDD2, RRP8, RPL7L1, BMS1, REXO4, UTP15, NAT10, TSR1, EXOSC8, BRF1, PWP2, NOP9, EXOSC2, SUV39H1, WDR75, FCF1, MRM3, NO…
GOBP	GOBP_PLATELET_ACTIVATION	4.11948e-07	1.41717e-05	0.674963	0.503653	2.09424	103	CD9, VWF, SELP, TREML1, EMILIN2, MERTK, VCL, P2RX1, FN1, LYN, THBD, SRC, CLIC1, PLSCR1, FCER1G, P2RY12, TLR4, PF4V1, PF4, COMP, ALOX12, PLEK, GP1BA, P2RY1, GP9, MYL9, FERMT3, PRKCD, TLN1, SYK, IL6, ACTG1, SERPINE2, PPIA, ILK, PTPN6, PLA2G4A, APOE, PEAR1, F2RL2, CSRP1, VAV3, PIK3CB, SLC7A11, RAP2B, ACTB, TEC, GP6
GOBP	GOBP_REGULATION_OF_MONOCYTE_CHEMOTAXIS	4.17833e-07	1.43339e-05	0.674963	0.796952	2.33996	19	CX3CR1, CCR2, FPR2, AIF1, LGMN, SERPINE1, LYN, CCR1, PLA2G7, MOSPD2, CREB3, ANO6
GOBP	GOBP_ORGANIC_HYDROXY_COMPOUND_METABOLIC_PROCESS	4.19629e-07	1.43553e-05	0.674963	0.370091	1.76095	322	ABCG4, PTAFR, ALDH3B1, SPTSSA, SPHK1, MAOA, CTSB, ITGAM, CYP39A1, ALDH1A1, LDLR, DHRS7, PCBD1, CYP3A5, LGMN, DAB2, IDH1, SPTLC2, LIPA, ASAH1, SOAT1, G6PD, DGAT2, NPC2, GALK1, GK5, CEBPA, PLCB1, DHRS9, AKR1C1, ACSS2, SC5D, RXRA, HIF1A, BMP6, LDHA, ALOX12, TTC39B, LPCAT3, PLEK, SCARF1, APP, TKTL1, PMVK, P2RY1, ACER2, PDE1B, CYP1B1, ACP3, ZEB2, SRD5A3, ACOT8, SORD, CPQ, CYB5R1, TPI1, DGAT1, FMO5, VP…
GOBP	GOBP_REGULATION_OF_MRNA_SPLICING_VIA_SPLICEOSOME	4.21245e-07	1.43704e-05	0.674963	-0.476362	-2.16689	80	SF1, HNRNPU, RBM5, SF3B4, SRSF6, SRSF2, RBFOX2, DAZAP1, HNRNPK, RBM7, MBNL1, CWC22, NCL, SRRM1, CELF1, DYRK1A, RBM8A, RBMXL1, YTHDC1, SNRNP70, FAM172A, JMJD6, METTL16, RBM39, TRA2B, SRSF10, WTAP, SAP18, REST, RBM15, MBNL3, PRPF19, DDX5, PRDX6, SRPK2, SNW1, MBNL2, SON, HSPA8, KHDRBS1
GOBP	GOBP_RESPONSE_TO_INTERLEUKIN_1	4.41593e-07	1.50228e-05	0.674963	0.520303	2.12765	88	CCL23, TNIP2, PYCARD, MAPK11, HES1, CCL2, IRAK3, CCL20, IL1R1, CCL3, SRC, TNFRSF11A, ACOD1, IL1RN, CCL8, PRKCI, PLCB1, CCL7, HIF1A, CEBPB, APP, MTHFR, IL1B, CYBA, MYD88, CAMP, MMP2, IL1R2, IL6, CITED1, CXCL8, RPS6KA4, TOLLIP, MAPK3, RIPK2, HYAL3, EDN1, HDAC4
bioplanet	bioplanet_Fibrin clot formation (clotting cascade)	4.47986e-07	1.5198e-05	0.674963	0.781437	2.33624	20	TFPI, F13A1, VWF, PRCP, THBD, PF4V1, PF4, F3, GP1BA, GP9, PROS1, SERPING1
GOBP	GOBP_RESPONSE_TO_TOXIC_SUBSTANCE	4.58795e-07	1.55217e-05	0.674963	0.450411	1.97474	145	TRPM6, S100A9, PTGES, SOD2, SLC47A1, ALOX5AP, MGST1, ALDH1A1, TLR2, NXN, CCL3, LYN, MGST2, CD36, SRXN1, MT1X, MT2A, MTARC2, GSTP1, SLC7A8, CYP1B1, GSTO1, PRDX5, TXNDC17, MGST3, PRDX3, SESN2, SLC18A2, GPX1, NFE2L2, MT1E, TNF, RDH12, GLRX, PDZK1, PON2, SLC30A1, ALAD, PRDX1, SCFD1, TXNRD1, SLC22A18, APOE, PTGS2, GSR, SLC7A11, EPHX2, AKR1A1, BPHL, CAT, ESD, SRSF9, PRXL2B, INHBB, MPO, PARK7, SLC23A1, …
REACTOME	REACTOME_TRNA_PROCESSING	4.63227e-07	1.56285e-05	0.674963	-0.454544	-2.148	99	TRMT12, TRMT61A, MTO1, NUP107, NUP160, NUP43, XPOT, NSUN2, RPP38, CLP1, RAE1, NUP54, LCMT2, NSUN6, NUP35, TP53RK, NUP42, TRMT10C, RTRAF, TRMT5, TSEN54, POP1, QTRT2, RPP21, TRMT11, CTU1, ALKBH8, NUP88, THG1L, TRMU, TRMT61B, DDX1, TRMT44, NUP155, CDKAL1, ADAT3, RPP14, RANBP2, NUP62, POP4, CPSF4, RAN, PUS7, NUP133, NUP210
bioplanet	bioplanet_Peptide G-protein coupled receptors	4.66813e-07	1.57062e-05	0.674963	0.554539	2.15529	69	PPBP, CCL23, CX3CR1, CCR2, FPR3, FPR1, FPR2, CXCL1, CCL2, CCL20, CXCL16, CCL3, CXCL3, C5AR1, C3AR1, CCR1, PF4, C5AR2, CCL7, CXCL6, HEBP1, APP, C3, CXCR1
GOBP	GOBP_AMEBOIDAL_TYPE_CELL_MIGRATION	4.76428e-07	1.59421e-05	0.674963	0.381045	1.79058	275	ENG, GLUL, HMOX1, NRP1, THBS1, ANXA3, TIMP1, TNFSF12, GRN, GATA2, S100P, LGMN, PRCP, TEK, DOCK5, FN1, SPRED1, S100A2, SRC, MMP9, HBEGF, P2RY12, PXN, ITGA2, SASH1, RAB13, ARSB, SEMA4A, VEGFA, LGALS8, KLF4, HIF1A, LAMTOR2, SPARC, IQGAP1, SLC8A1, MAP2K3, CORO1C, CYP1B1, SEMA6B, SEMA3C, NOTCH1, ZEB2, DPP4, ADAM9, RHOB, RIN2, PLEC, TGFBR1, RRAS, ENPP2, AGO2, CIB1, LPXN, NRP2, GLIPR2, GPX1, RTN4, ITGB1…
GOBP	GOBP_REGULATION_OF_LIPID_TRANSPORT	4.75482e-07	1.59421e-05	0.674963	0.5253	2.09959	82	ABCG4, PTGES, TREM2, THBS1, RETN, LRP1, ITGAV, DAB2, TSPO, ACSL1, TNFRSF11A, NR1H3, IL1A, RXRA, BMP6, TTC39B, LPCAT3, ANXA2, DBI, IL1B, SURF4, FURIN, PRELID1, PRKCD, SYK, YJEFN3, SPP1, LAMTOR1, ABCA7, TMEM30A, PLA2G4A, APOE, SREBF2, AKT1, ABCA1, EDN1, NUS1, P2RX4, PLA2G6, ACSL5, SCP2
GOBP	GOBP_DETOXIFICATION	4.80109e-07	1.60215e-05	0.659444	0.533051	2.15043	85	S100A9, PTGES, SOD2, SLC47A1, ALOX5AP, MGST1, ALDH1A1, NXN, MGST2, CD36, SRXN1, MT1X, MT2A, MTARC2, GSTP1, GSTO1, PRDX5, TXNDC17, MGST3, PRDX3, SESN2, GPX1, NFE2L2, MT1E, RDH12, GLRX, PDZK1, SLC30A1, PRDX1, TXNRD1, SLC22A18, APOE, PTGS2, GSR, AKR1A1, CAT, ESD, PRXL2B, MPO, PARK7, GSTK1, NOS3, ABCB1, RALBP1, SELENOF, SOD1
GOBP	GOBP_REGULATION_OF_INTRACELLULAR_SIGNAL_TRANSDUCTION	5.05666e-07	1.68285e-05	0.659444	0.288234	1.46189	1209	CLU, CCL23, MARCO, NRG1, WLS, CX3CR1, S100A12, S100A9, ENG, SOD2, VNN1, VWF, SELP, FGR, TNFAIP8L3, TNIP2, RASGRP4, TREM2, S100A8, HMOX1, LILRA5, FCGR2B, SPHK1, NRP1, PLAUR, THBS1, OSM, NOD2, FPR2, S100A4, PYCARD, CARD9, TNFRSF1A, LILRB4, CD300A, SPI1, GSDME, CCL2, IRAK3, IGFBP4, DENND3, CCL20, BCL3, CAVIN3, ENO1, SETD9, ITGAV, CLEC7A, NOL3, DUSP6, NAIP, DAB2, TLR2, CASP1, GUCY1A1, RHOU, RRAGC, NO…
REACTOME	REACTOME_COLLAGEN_DEGRADATION	5.16723e-07	1.70682e-05	0.659444	0.703587	2.264	28	CTSD, CTSB, COL9A2, MMP1, MMP19, CTSL, MMP9, FURIN, ADAM9, MMP2, ADAM17, COL10A1
GOBP	GOBP_POSITIVE_REGULATION_OF_MONONUCLEAR_CELL_MIGRATION	5.1705e-07	1.70682e-05	0.659444	0.607122	2.20992	50	CX3CR1, CCR2, LGALS3, FPR2, PYCARD, SPI1, AIF1, CCL20, LGMN, SERPINE1, CCL3, CCR1, CCL7, APP, GAS6, PLA2G7, ADAM8, TNF, ADAM17, MOSPD2, SPN, CREB3, ANO6, CALR, OXSR1, RHOA, TNFSF14
GOBP	GOBP_REGULATION_OF_EXOCYTOSIS	5.16926e-07	1.70682e-05	0.659444	0.467629	2.01374	132	PTAFR, RAB3D, CCR2, ADGRE2, FGR, HMOX1, FCGR2B, ITGAM, CD300A, SPI1, GATA2, FES, P2RX1, SEPTIN5, LYN, SDCBP, RAB13, TPCN2, PRAM1, ATP2A2, ADORA2B, GAB2, SYN1, STX1A, P2RY1, CBARP, RAB10, RIMS3, NOTCH1, CHMP2A, APBA1, CALM3, RAB27A, SYK, LAMP1, CDK5, RABGEF1, RAB27B, STXBP2, ITGB2, CD177, SYT11, SCAMP5, MICAL1, SMPD3, RAP1A, HYAL3, CLASP2, PLA2G6, SEPTIN2, CHMP6, SYP, UNC13D, NCKAP1L, BACE1
REACTOME	REACTOME_HATS_ACETYLATE_HISTONES	5.27454e-07	1.73184e-05	0.659444	-0.469074	-2.16154	84	SUPT20H, BRPF3, ELP5, KANSL2, KANSL1, JADE2, JADE1, KAT14, ING3, KAT6A, TADA1, KAT7, BRD8, VPS72, TADA2B, EPC1, JADE3, TAF5L, KAT6B, ELP2, ELP6, WDR5, ELP1, YEATS4, SGF29, NCOA1, ATF2, ELP3, NCOA2, RBBP7, HAT1, TAF6L, CREBBP, BRPF1, PHF20, YEATS2, ING5, H4C2, HCFC1, MSL3, MSL1, SUPT7L, KAT5, KAT8, CLOCK, KANSL3, BRD1, ING4, SAP130, MSL2
GOBP	GOBP_TISSUE_MIGRATION	5.27458e-07	1.73184e-05	0.659444	0.415287	1.89159	202	GLUL, HMOX1, NRP1, THBS1, ANXA3, TNFSF12, GRN, GATA2, S100P, LGMN, PRCP, TEK, DOCK5, SPRED1, S100A2, SRC, MMP9, HBEGF, PXN, ITGA2, SASH1, RAB13, ARSB, SEMA4A, VEGFA, LGALS8, KLF4, HIF1A, SPARC, MAP2K3, CORO1C, CYP1B1, NOTCH1, ZEB2, DPP4, ADAM9, ACTA1, RHOB, RIN2, TGFBR1, RRAS, ENPP2, CIB1, LPXN, NRP2, GLIPR2, GPX1, RTN4, ITGB1BP1, NFE2L2, TNF, ADAM17, PKN3, CORO1B, PTK2, PLXND1, ADTRP, MIR29A, AP…
bioplanet	bioplanet_Cell surface interactions at the vascular wall	5.33827e-07	1.74464e-05	0.659444	0.532833	2.11428	78	SELP, MERTK, SLC7A7, MMP1, ITGAM, ITGAV, TEK, FN1, LYN, THBD, SRC, FCER1G, PF4V1, PF4, SLC16A3, YES1, SLC7A8, OLR1, GAS6, ATP1B3, ESAM, ITGAX, TREM1, PROS1, SELPLG, ITGB2, CD177, SPN, PPIA, PTPN6, CD58, PIK3CB, SLC7A11, SOS1, SLC7A9, GP6, SLC7A5, L1CAM, ITGB1, ITGA5, DOK2, SHC1, GRB2
bioplanet	bioplanet_Latent infection of Homo sapiens with Mycobacterium tuberculosis	5.34205e-07	1.74464e-05	0.659444	0.744395	2.36819	25	NCF2, SLC11A1, ATP6V0D2, NCF4, CYBB, ATP6V1A, TCIRG1, ATP6V0D1, NCF1, ATP6V0A1, CYBA, CAMP, ATP6V1D, ATP6V1B2, ATP6V0E1
GOBP	GOBP_EXTRACELLULAR_MATRIX_DISASSEMBLY	5.57784e-07	1.8168e-05	0.659444	0.668089	2.26193	35	MMP1, MMP19, LRP1, LAMC1, CTSS, FLOT1, MMP9, CAPG, CST3, ADAM15, FURIN, DPP4, GSN, ADAM8, LCP1, MMP2, IL6, DDR1
GOBP	GOBP_DETECTION_OF_OTHER_ORGANISM	5.59712e-07	1.81825e-05	0.659444	0.902729	2.26268	10	NOD2, CLEC7A, NAIP, TLR2, TLR4, NLRC4, TLR6, TLR1
GOBP	GOBP_POSTTRANSCRIPTIONAL_REGULATION_OF_GENE_EXPRESSION	5.68154e-07	1.84079e-05	0.659444	-0.277741	-1.58131	431	METTL18, CNOT8, TENT5C, SMAD3, PAIP2B, PDE12, PHAX, MATR3, FASTKD1, HNRNPU, HNRNPA0, CNOT6L, ZFP36L2, TRAP1, RNF139, IREB2, GZMB, CASC3, CSDE1, FASTKD5, TENT2, LSM14A, PELO, GSPT1, NSUN2, TSC1, TOB1, ATF4, ROCK2, ATXN2, PUM1, EIF4A3, CNOT2, CNBP, SMAD2, TSNAX, POLDIP3, NGRN, PUM3, PER1, METTL14, ABCE1, CD28, CNOT1, HNRNPD, TNRC6C, SOX4, POLR2D, CLP1, NUDT21, CNOT7, AXIN2, EIF4G2, AGO3, CARHSP1, C…
GOBP	GOBP_POSITIVE_REGULATION_OF_CHEMOKINE_PRODUCTION	6.01851e-07	1.94482e-05	0.659444	0.579399	2.18766	55	HMOX1, NOD2, PYCARD, CARD9, AIF1, CLEC7A, TLR2, IL18, AZU1, LPL, TLR4, CSF1R, ADORA2B, HIF1A, APP, IL1B, MYD88, TICAM1, SYK, IL6, TNF, ADAM17, OAS1, RIPK2, HAVCR2, IL1RL1, IL7, EIF2AK2, AIRE, CD74
REACTOME	REACTOME_ROS_AND_RNS_PRODUCTION_IN_PHAGOCYTES	6.07202e-07	1.95695e-05	0.659444	0.741509	2.35901	25	NCF2, SLC11A1, ATP6V0D2, NCF4, CYBB, ATP6V1A, TCIRG1, ATP6V0D1, NCF1, ATP6V0A1, CYBA, ATP6V1D, ATP6V1B2, ATP6V0E1
GOBP	GOBP_POSITIVE_REGULATION_OF_MOLECULAR_FUNCTION	6.22453e-07	2.00084e-05	0.659444	0.290599	1.46814	1071	CLU, CCL23, NRG1, CX3CR1, S100A12, S100A9, PTAFR, NIBAN2, FCGR1A, CCR2, ASAP2, FGR, TNFAIP8L3, RASGRP4, TREM2, FAM20A, S100A8, MEFV, ARRDC4, LILRA5, SPHK1, STING1, NRP1, VDR, PLAUR, SLC11A1, THBS1, ARAP3, MERTK, CTSD, NOD2, FPR2, ANXA3, PSAP, DAPK1, CASP4, PYCARD, ITGAM, CARD9, CD300A, GPRC5A, CLDN5, GRN, IFNGR2, HES1, IL1RAP, CCL2, IRAK3, HFE, CTBP2, CCL20, RGL3, LRP1, MTSS2, P2RX1, FOSL1, CLEC7…
GOBP	GOBP_CALCIUM_ION_TRANSMEMBRANE_TRANSPORT	6.27943e-07	2.00904e-05	0.659444	0.42831	1.92913	184	TRPM6, TRPM4, TMEM37, ITGAV, P2RX1, NOL3, FKBP1B, CCL3, LYN, G6PD, GEM, TPCN2, VMP1, STAC3, ATP2A2, GPR35, YWHAE, GRIN2C, SLC24A3, PRKACA, ATP2C1, ANXA2, SLC8A1, GP1BA, SLC8B1, CYBA, CBARP, CAPN3, GSTO1, GP9, ERO1A, GAS6, EHD3, TMEM38B, CALM3, SESTD1, TRPM2, HTT, CHD7, JSRP1, CDK5, PSEN1, MCOLN1, VDAC1, RYR1, P2RY6, FKBP1A, CCR5, PTPN6, SRI, MICU3, TMEM38A, AHNAK, ANO6, TMEM165, CEMIP, EDN1, SEC6…
bioplanet	bioplanet_Chemokine signaling pathway	6.28288e-07	2.00904e-05	0.659444	0.451794	1.97423	141	PPBP, CCL23, CX3CR1, CCR2, HCK, FGR, CXCL1, GNB4, CCL2, CCL20, CXCL16, CCL3, CXCL3, LYN, CCL8, PXN, PF4V1, CCR1, PF4, PLCB1, CCL7, CXCL6, PRKACA, ARRB1, CCL4L1, NCF1, GNG11, ADCY4, PRKCD, PAK1, CXCL14, CXCR1, GNB1, GNG5, PTK2, PARD3, CCR5, CXCL8, STAT3, PLCB2, GNB2, VAV3, MAPK3, PIK3CB, AKT1, RAP1A, PLCB3, SOS1, GNAI1, ARRB2, GRK6
GOBP	GOBP_ANTIGEN_PROCESSING_AND_PRESENTATION_OF_PEPTIDE_OR_POLYSACCHARIDE_ANTIGEN_VIA_MHC_CLASS_II	6.32956e-07	2.0187e-05	0.659444	0.797434	2.32464	18	TREM2, FCGR2B, THBS1, CTSD, PYCARD, CTSL, LGMN, IFI30, CTSS, FCER1G
GOBP	GOBP_MACROPHAGE_ACTIVATION_INVOLVED_IN_IMMUNE_RESPONSE	6.61259e-07	2.10349e-05	0.659444	0.803415	2.29485	17	CX3CR1, DYSF, TREM2, SBNO2, GRN, TYROBP, TREX1, FER1L5, TICAM1, SYK, IFI35, SUCNR1, NMI, HAVCR2
GOBP	GOBP_PEPTIDYL_LYSINE_ACETYLATION	6.87984e-07	2.18284e-05	0.659444	-0.383196	-1.93743	153	NFYA, BRPF3, NAP1L2, KANSL2, TAF1, KANSL1, JADE2, PBXIP1, SIRT1, JADE1, PRKAA1, KAT14, ING3, KAT6A, APBB1, TADA1, GATA3, KAT7, MAP3K7, SMAD4, PER1, BRD8, VPS72, SOX4, TADA2B, EPC1, GTF3C4, AUTS2, KLF15, JADE3, HDAC2, TAF5L, KAT6B, DIP2B, CRTC2, TAF7, DIP2A, WDR5, NFYB, LEF1, POLE3, YEATS4, CTCF, SGF29, NCOA1, LDB1, THAP7, ATF2, PYGO2, TAF5, MLLT1, EID1, HAT1, TAF6L, CREBBP, BRPF1, NOC2L, PHF20, T…
GOBP	GOBP_REGULATION_OF_LEUKOCYTE_MEDIATED_IMMUNITY	6.9868e-07	2.21104e-05	0.659444	0.425517	1.91236	178	CX3CR1, TRPM4, PTAFR, CCR2, ADGRE2, FGR, TREM2, HMOX1, FCGR2B, NECTIN2, NOD2, ITGAM, LILRB4, CD300A, SPI1, GATA2, FES, HFE, CLEC7A, IL18, IL1R1, LYN, IL10, TYROBP, TNFRSF1B, TLR4, SCIMP, PRAM1, ADORA2B, GAB2, CLEC4G, CXCL6, IL1B, NLRP3, BCL6, FUT7, ICAM1, TICAM1, C3, CADM1, SYK, LAMP1, IL6, TNF, RABGEF1, NCR1, PARP3, STXBP2, ITGB2, CD177, MAD2L2
GOBP	GOBP_CELLULAR_RESPONSE_TO_ENDOGENOUS_STIMULUS	7.01519e-07	2.21431e-05	0.659444	0.300413	1.51191	845	CX3CR1, TRPM4, PTAFR, ENG, P2RY2, TFPI, HTR7, AQP9, CYFIP1, ITGB5, TREM2, GRB10, FCGR2B, RAB31, THBS1, SLC1A3, NOD2, HTRA1, FPR2, CTSB, TNFAIP6, UGCG, SPINT1, CASP4, SPI1, CLDN5, AIF1, HES1, ZYX, PAQR7, BAIAP2, CCL2, PCSK6, HFE, CTSL, LRP1, MTSS2, AGTRAP, LGMN, DAB2, RRAGC, NOTCH2, PRCP, CTSS, SH2B2, SPRED1, CYBB, PTPRE, LYN, PTGER2, KCNQ1, ACSL1, SRC, GAS2L1, ACOD1, LPL, SDCBP, PTPN1, SPRY1, PRK…
GOBP	GOBP_RNA_DESTABILIZATION	7.06895e-07	2.22554e-05	0.659444	-0.47314	-2.15237	81	CNOT8, PDE12, HNRNPU, CNOT6L, ZFP36L2, CSDE1, TOB1, ROCK2, PUM1, CNOT2, METTL14, CNOT1, HNRNPD, TNRC6C, POLR2D, CNOT7, DHX9, YTHDF2, RC3H2, EXOSC9, EIF4ENIF1, TNRC6B, BTG2, CNOT6, CELF1, GIGYF2, UPF1, PAIP1, NT5C3B, PATL2, EXOSC8, EXOSC2, DCP1B, DIS3, METTL16, YTHDF1, EXOSC3, DCP1A, PNPT1, TUT4, DIS3L2, ZFP36, YTHDF3, CNOT3
PID	PID_INTEGRIN3_PATHWAY	7.11348e-07	2.2281e-05	0.659444	0.717456	2.29775	26	PLAU, SPHK1, PLAUR, THBS1, ITGAV, LAMC1, FN1, ITGA2B, VEGFA, TGFBI, SPP1
bioplanet	bioplanet_Beta-3 integrin cell surface interactions	7.11348e-07	2.2281e-05	0.659444	0.717456	2.29775	26	PLAU, SPHK1, PLAUR, THBS1, ITGAV, LAMC1, FN1, ITGA2B, VEGFA, TGFBI, SPP1
GOBP	GOBP_CELL_SUBSTRATE_ADHESION	7.27186e-07	2.26938e-05	0.659444	0.397516	1.8487	230	VWF, ITGB5, PLAU, NRP1, THBS1, BVES, MERTK, ITGAM, VCL, ZYX, ITGAV, DAB2, LAMC1, SERPINE1, JAG1, TEK, DOCK5, FN1, SRC, ITGA2B, CD36, PXN, ITGA2, VEGFA, CDK6, ARHGAP6, ITGA9, CTTN, CORO1C, MEGF9, ACER2, BCL6, ADAM15, FERMT3, NOTCH1, GAS6, ADAM9, RIN2, RRAS, LAMB2, CIB1, LPXN, ACTG1, ITGB1BP1, ITGAX, DDR1, DISC1, CDK5, PARVG, ITGB2, PTK2, MICALL2, ILK, HSD17B12, MYO1G, SIGLEC1, PTPRJ, LAMB3, PIK3CB…
REACTOME	REACTOME_DNA_REPAIR	7.28232e-07	2.26938e-05	0.659444	-0.324759	-1.75564	265	SMARCA5, XPC, TDP2, ACTR8, PARG, COPS2, WDR48, TDP1, RPA2, TERF2, RAD18, RIF1, APBB1, MRE11, POT1, BLM, EME1, RFC5, NFRKB, XRCC6, FANCM, UIMC1, PIAS1, FAN1, POLR2D, ERCC4, PCNA, ALKBH3, MUTYH, PPIE, USP1, TERF1, FANCB, ZNF830, TERF2IP, SPRTN, USP7, CUL4B, POLK, ALKBH5, TP53, KPNA2, ATM, ADPRS, COPS3, SLX4, DCLRE1B, RAD9A, REV1, ACTR5, FANCC, RAD51C, RNF111, POLE3, MSH2, POLD1, CDK7, POLR2C, XAB2,…
GOBP	GOBP_POSITIVE_REGULATION_OF_PROTEIN_KINASE_B_SIGNALING	7.69844e-07	2.39296e-05	0.659444	0.529432	2.09127	76	NRG1, CX3CR1, ENG, TNFAIP8L3, THBS1, OSM, IL18, TEK, CCL3, SRC, HBEGF, P2RY12, STK3, TCF7L2, F3, HIP1, GAS6, TGFBR1, ADAM8, HCLS1, GPX1, RTN4, SPRY2, ITGB1BP1, TNF, INSR, MTDH, PTK2, GDF15, MIR29A, PTPRJ, PIK3CB, MEIS3, ARRB2, P2RX4, MET, ITGB1, PARK7, GCNT2, FGF2
GOBP	GOBP_POSITIVE_REGULATION_OF_TRANSCRIPTION_BY_RNA_POLYMERASE_II	7.75381e-07	2.40407e-05	0.659444	-0.23744	-1.42698	800	ZBTB18, NR1D2, NFYA, NFATC3, ZNF473, JUND, SMAD3, ELF1, SMARCA5, MRTFA, BCLAF1, IRF1, LRP5, ETS1, MED17, ZNF263, KLF2, SSBP2, SP3, NRIP1, TAF1, CREBRF, HNRNPU, S1PR1, CGA, IKBKB, ZNF24, SIRT1, SENP2, ZFP62, RGCC, CDK13, MAML2, AKIRIN1, LPIN1, ZEB1, TCEA2, NOTCH4, DBP, KAT6A, APBB1, ZNF43, ZNF143, PRDM10, GATA3, MRTFB, ATF4, KAT7, NFATC2, NRF1, ZNF48, RFXAP, MEF2D, MAML1, APBB2, CNBP, SMAD2, PRDM1…
GOBP	GOBP_RNA_MODIFICATION	7.85568e-07	2.42951e-05	0.659444	-0.403367	-2.02112	132	TRMT12, ELP5, TRMT61A, MTO1, VIRMA, MOCS3, THUMPD1, RAMAC, NSUN2, METTL14, ALKBH3, CBLL1, LCMT2, NSUN6, APOBEC2, METTL8, CMTR2, DTWD2, ALKBH5, TRMT10C, PCIF1, THUMPD2, MEPCE, OSGEPL1, TRMT5, NAT10, CMTR1, PUS10, QTRT2, ELP1, TRMT11, CDK5RAP1, CTU1, TRMT1L, ALKBH1, MRM3, JMJD6, ALKBH8, ELP3, METTL16, FTSJ3, THG1L, TRMU, TRMT61B, TRMT44, CDKAL1, METTL5, WTAP, PUS7, AARS2, RBM15, NSUN3, DUS3L, THUMP…
GOBP	GOBP_RESPONSE_TO_FUNGUS	7.99017e-07	2.46488e-05	0.659444	0.676451	2.27198	33	CX3CR1, S100A12, S100A9, S100A8, CARD9, SPI1, CLEC7A, TLR4, SCIMP, PTX3, CLEC4A, GAPDH, MYD88, SYK, CLEC4E, COTL1, BTK
GOBP	GOBP_REGULATION_OF_COAGULATION	8.2e-07	2.52325e-05	0.659444	0.618194	2.21588	44	CD9, TFPI, PLAU, THBS1, SERPINE1, THBD, ANXA5, CD36, ALOX12, F3, EPHB2, GP1BA, PRKCD, NFE2L2, PSEN1, PROS1, SERPINE2, ADTRP, SERPING1, ST3GAL4, APOE, SERPINB2, ANO6
GOBP	GOBP_POSITIVE_REGULATION_OF_VASCULATURE_DEVELOPMENT	8.30517e-07	2.54921e-05	0.659444	0.48158	2.01096	109	ADM, CX3CR1, ENG, EMILIN2, HMOX1, SPHK1, NRP1, THBS1, ANXA3, HK2, TNFSF12, GRN, GATA2, SERPINE1, TEK, HGF, CYBB, IL10, C5AR1, C3AR1, ECM1, SASH1, VEGFA, IL1A, KLF4, HIF1A, F3, IL1B, CYP1B1, C3, RHOB, CAMP, RRAS, AGO2, NFE2L2, ITGAX, RAMP2, MTDH, CXCL8, STAT3, MIR29A
REACTOME	REACTOME_ANTI_INFLAMMATORY_RESPONSE_FAVOURING_LEISHMANIA_PARASITE_INFECTION	8.99304e-07	2.75344e-05	0.659444	0.513559	2.10008	88	ADM, FCGR1A, HCK, HTR7, FGR, CD163, GNB4, RHBDF2, PRKAR2B, GPR27, LYN, PTGER2, IL10, SRC, ADORA2B, YES1, GPR84, PRKACA, GNG11, ADCY4, FURIN, ADRB2, HRH2, PTGIR, SYK, GNB1, IL6, ADAM17, RAMP2, GNG5, GGT5, CYSLTR2, GNB2
WP	WP_COMPLEMENT_SYSTEM_IN_NEURONAL_DEVELOPMENT_AND_PLASTICITY	9.51634e-07	2.9064e-05	0.659444	0.537993	2.10707	71	CLU, CX3CR1, MERTK, ITGAM, FCN1, ITGAV, C5AR1, C3AR1, PLSCR1, PRKCI, CFP, C1QB, C5AR2, C1QC, CFD, ATP11A, APAF1, GAS6, C3, CFH, ITGAX, CAP1, PROS1, ITGB2, CASP7, PARD3, SERPING1, FCN2, PLSCR3
GOBP	GOBP_OSTEOCLAST_DIFFERENTIATION	9.54409e-07	2.90762e-05	0.643552	0.540755	2.1031	70	SNX10, TREM2, SBNO2, TNFAIP6, LILRB4, NOTCH2, CCL3, OSCAR, SRC, TNFRSF11A, MAFB, TYROBP, TCIRG1, TLR4, CCR1, CSF1R, GAB2, CEBPB, ANXA2, ESRRA, CD109, ATP6AP1, TNF, MITF, PPARGC1B, KLF10, TCTA
WP	WP_NETWORK_MAP_OF_SARSCOV2_SIGNALING_PATHWAY	9.79693e-07	2.97725e-05	0.643552	0.434921	1.9269	155	SELP, STEAP3, CTSD, CTSB, CD163, CXCL1, CCL2, CCL20, CTSL, CXCL16, IL18, SERPINE1, CD14, FN1, CCL3, CXCL3, IL10, CCL8, CFP, PF4, IL1A, HIF1A, MMP25, CXCL6, EIF4EBP1, CEBPB, TP53I3, IL1B, GP1BA, NLRP3, LGALS3BP, MYD88, IFI44L, GSN, RRAS, TRPM2, CFH, CTSZ, IL1R2, CXCR1, IL6, ACTG1, IL22, TNF, MX1, CCR5, CXCL8, PTPN6, IL18RAP, VPS16, PTGS2, AKT1, ACTB, NLRP1, CASP5, BID, IFI6, DDX58, IRAK1, IL7, CD4…
GOBP	GOBP_AMYLOID_BETA_CLEARANCE	9.91483e-07	3.00562e-05	0.643552	0.683757	2.24387	30	CLU, MARCO, TREM2, MSR1, ITGAM, LDLR, LRP1, C5AR1, CD36, IFNGR1, C3, PICALM, TNF, INSR, ABCA7, ITGB2, APOE
WP	WP_SELENIUM_MICRONUTRIENT_NETWORK	1.01193e-06	3.06001e-05	0.643552	0.602447	2.25648	54	ALOX5, SOD2, MSRB1, ALOX5AP, LDLR, CCL2, SERPINE1, CTH, KYNU, MTHFR, IL1B, PRDX5, ICAM1, PRDX3, GPX1, IL6, TNF, SELENOH, INSR, PNPO, PRDX1, TXNRD1, PTGS2, GSR, ABCA1
GOBP	GOBP_ACTIN_FILAMENT_ORGANIZATION	1.0433e-06	3.14711e-05	0.643552	0.372178	1.76392	307	MYO7A, HCK, CYFIP1, ITGB5, MSRB1, NRP1, PYCARD, PSTPIP2, CDC42EP2, AIF1, ZYX, BAIAP2, SCIN, TMSB10, MYO1F, MARCKS, SSH3, SRC, GAS2L1, CYRIA, PRKCI, CAPG, PXN, ANG, MTSS1, TPM4, CDC42EP3, ARHGAP6, CAPZB, CTNNA1, ARRB1, WASHC3, PLEK, CTTN, ZBED3, GAS7, CORO1C, HIP1, BRK1, ARPC3, FHOD1, CFL1, ARHGAP18, PRKCD, SHTN1, GSN, ACTA1, RHOB, PAK1, PLEC, TGFBR1, LCP1, ESAM, RHPN1, NCKAP1, HCLS1, ACTG1, ITGB1…
GOBP	GOBP_NEGATIVE_REGULATION_OF_PROTEOLYSIS	1.04675e-06	3.14977e-05	0.643552	0.415858	1.88161	192	TFPI, CSTA, SERPINA1, PLAUR, THBS1, SERPINB1, CTSB, SPINT1, TIMP1, PZP, HFE, LRP1, QRICH2, NOL3, NAIP, SERPINE1, HGF, IL10, SRC, RENBP, MMP9, SDCBP, ECM1, NR1H3, VEGFA, APLP2, KLF4, SERPINB10, ANXA2, APP, CST3, GAPDH, PRDX5, FURIN, GAS6, PRDX3, C3, SERPINB8, CSTB, CTSZ, IL1R2, CD109, GPX1, PICALM, TFPI2, TNF, CDK5, PSEN1, PROS1, ALAD, CSNK2A2, SERPINE2, IFI16, SERPING1, CDKN2D, POR, SERPINB2, OPH…
GOBP	GOBP_DOUBLE_STRAND_BREAK_REPAIR	1.09886e-06	3.29846e-05	0.643552	-0.321888	-1.71654	236	DNTT, TDP2, ACTR8, PPP4R3B, WDR48, TDP1, RPA2, ING3, RIF1, MRE11, RAD21, POT1, HELQ, BLM, EME1, XRCC6, CDC7, UVRAG, FANCM, BRD8, UIMC1, VPS72, KDM2A, FAN1, ERCC4, TFIP11, SWSAP1, RNF138, EPC1, SHLD3, SMARCAL1, APLF, AP5Z1, FANCB, RFWD3, CYREN, ARID2, SETX, SETD2, SFPQ, TERF2IP, MAGEF1, TP53, ATM, SLX4, DCLRE1B, HDGFL2, NABP1, MMS19, SMCHD1, ACTR5, RAD51C, SLF2, MSH2, YEATS4, ATP23, HMCES, MARF1, …
WP	WP_VITAMIN_D_RECEPTOR_PATHWAY	1.10842e-06	3.31903e-05	0.643552	0.488664	2.02859	98	ALOX5, CD9, S100A9, LRRC25, ASAP2, S100A8, VDR, SERPINB1, S100A4, ITGAM, SLC37A2, CYP3A5, G0S2, CD14, THBD, S100A2, G6PD, CEBPA, RXRA, KLF4, HIF1A, BMP6, S100A6, SLC8A1, IRF5, BCL6, CDKN1A, STEAP4, MX2, ADRB2, ADGRE5, CAMP, SPP1, PRDM1, TREM1, CRACR2B, CDKN2D, MXD1
GOBP	GOBP_RIBONUCLEOPROTEIN_COMPLEX_SUBUNIT_ORGANIZATION	1.20722e-06	3.59989e-05	0.643552	-0.385519	-1.94631	156	ABT1, SF1, RBM5, CPSF7, DYRK3, CPSF6, RAMAC, SRSF6, AAR2, SF3B1, DHX30, DDX28, SHQ1, BRIX1, DDX20, POLR2D, CLP1, NUDT21, TFIP11, CDC73, AGO3, SRSF5, DHX9, SRPK3, PSIP1, SNU13, DDX23, SETX, CD2BP2, PTBP2, STRAP, FASTKD2, DHX8, SART3, AGO1, SF3A1, ZNHIT3, ATM, CELF1, PRPF39, GEMIN5, SLU7, PWP2, YTHDC1, PRPF18, XAB2, YJU2, EIF2D, PRPF6, SNRPB, KHDC4, USP4, SMN1, DDX1, SRSF10, LUC7L, SCAF11, GCFC2, R…
REACTOME	REACTOME_IMMUNOREGULATORY_INTERACTIONS_BETWEEN_A_LYMPHOID_AND_A_NON_LYMPHOID_CELL	1.2081e-06	3.59989e-05	0.643552	0.515129	2.05894	82	FCGR1A, CD300C, TREML1, TREM2, LILRA5, FCGR2B, NECTIN2, PILRA, LILRB4, CD300A, LILRA6, CD300LB, SIGLEC5, CD300LF, LILRA1, SIGLEC9, OSCAR, TYROBP, SIGLEC6, CLEC4G, CD300E, ICAM3, LILRA2, NPDC1, ICAM1, LILRB5, C3, TREM1, NCR1, ITGB2
GOBP	GOBP_HISTONE_METHYLATION	1.23082e-06	3.65869e-05	0.643552	-0.4106	-2.04318	127	NFYA, GFI1, KANSL2, KANSL1, SIRT1, ZNF274, EHMT2, RIF1, SMYD5, GATA3, KDM4C, NELFA, SMAD4, EZH1, PAXBP1, KDM3A, PRDM4, SETD4, PHF1, N6AMT1, CHTOP, AUTS2, ZNF304, SUZ12, PAF1, WDR82, SETD2, RLF, RRP8, NSD1, SUV39H2, ARID4A, NSD3, WDR5, NFYB, MTF2, CTCF, KMT5A, SUV39H1, NTMT1, PAX5, PYGO2, SETDB2, DNMT3B, EHMT1, CTR9, CREBBP, MLLT6, PHF20, NSD2, CXXC1, PRDM2, SMYD3, KMT2B, PAXIP1, HCFC1, RBBP5, PRM…
REACTOME	REACTOME_TOLL_LIKE_RECEPTOR_CASCADES	1.2379e-06	3.66509e-05	0.643552	0.451742	1.95452	135	TLR5, S100A12, S100A9, TNIP2, S100A8, NOD2, CTSB, ITGAM, GSDME, MAPK11, IRAK3, CTSL, LY96, LGMN, DUSP6, TLR2, CD14, CTSS, CD180, TLR8, TLR4, CD36, DNM1, TLR6, TLR1, MAP3K8, GSDMD, APP, UNC93B1, MAP2K3, MAPKAPK3, MYD88, TICAM1, PPP2CB, MAPKAPK2, CNPY3, PELI3
HALLMARK	HALLMARK_HYPOXIA	1.23895e-06	3.66509e-05	0.643552	0.444537	1.96506	153	ADM, HMOX1, PLAUR, HK2, S100A4, CAVIN3, ENO1, SERPINE1, NFIL3, SDC3, GALK1, SLC2A5, VEGFA, PFKFB3, TGFBI, SLC6A6, ADORA2B, AK4, LDHA, MT2A, F3, IER3, CASP6, ANXA2, BHLHE40, TKTL1, CDKN1C, GAPDH, CDKN1A, PRDX5, ERO1A, GAA, PLIN2, PAM, TPI1, PPFIA4, PGK1, KLF7, PLAC8, SDC2, IL6, ATF3, MT1E, HEXA, NAGK, FOSL2, PFKL, GLRX, HK1, TPST2, GBE1, TGM2, NDRG1, UGP2, SAP30, STBD1, P4HA2, PFKP
GOBP	GOBP_RESPONSE_TO_CHEMOKINE	1.27215e-06	3.75422e-05	0.643552	0.560505	2.13482	62	PPBP, CCL23, CX3CR1, CCR2, TREM2, CXCL1, CCL2, CCL20, CCL3, CXCL3, CCL8, PF4V1, CCR1, PF4, GPR35, CCL7, CMKLR1, HIF1A, CXCL6, CCRL2, CIB1, CXCR1, CCR5, CXCL8
GOBP	GOBP_CARBOHYDRATE_CATABOLIC_PROCESS	1.29772e-06	3.82047e-05	0.643552	0.477864	2.02178	114	PYGL, HK3, HK2, SCARB2, ENO1, AOAH, PGD, GALK1, GK5, SLC2A6, TREX1, HIF1A, MANBA, LDHA, APP, TKTL1, CHIT1, GAPDH, FUT7, NAGA, HEXB, GAA, SORD, PGAM1, TPI1, PGK1, GLB1, PSEN1, PFKL, INSR, HK1, MLXIPL, NCOR1, STAT3, PPP1CA, STBD1, GALE, ADPGK, PFKP, CTBS, BAD, HDAC4, DERA, ARL2, GM2A, OGDH, ENOSF1, XYLB, NUDT5, ZBTB7A, PGM1, IDNK, NEU1, SIRT6, GSK3A
bioplanet	bioplanet_Transcription	1.35273e-06	3.97287e-05	0.643552	-0.380861	-1.91646	145	ZNF473, TAF1, GTF3C5, CPSF7, SNAPC5, SRSF6, EHMT2, ZNF143, SRSF2, NELFA, BRF2, TBP, POLR2D, POLR1D, CLP1, NUDT21, TFAM, SRSF5, UBTF, POLR3D, GTF3C4, CSTF1, GTF3A, GTF3C2, CSTF3, PAPOLA, MTERF1, HIST1H2BH, SRRM1, NFX1, CCNT2, TAF11, RBM8A, NELFCD, BRF1, H2AFX, CDK7, CCNT1, POLR2C, SNAPC4, TAF5, SUPT16H, POLR3B, ERCC6, POLR2B, SNRPB, SUPT4H1, GTF2H2, POLRMT, CBX3, POLR3C, TAF1C, RNGTT, CDK9, POLR3A…
GOBP	GOBP_MUSCLE_CONTRACTION	1.36138e-06	3.98872e-05	0.643552	0.411628	1.85732	190	MYH14, TRPM4, PTAFR, HTR7, SPHK1, DOCK4, ENO1, P2RX1, GUCY1A1, FKBP1B, TIFAB, DOCK5, MYOF, KCNQ1, ITGA2, TPCN2, STAC3, COMP, MYLK, ATP2A2, ADORA2B, TPM4, DES, PRKACA, CTTN, SLC8A1, MAP2K3, GSTO1, MYL9, GAA, ADRB2, EHD3, GSN, ACTA1, TMEM38B, SCN1B, CALM3, KCNJ2, MYL6B, ARHGAP42, TNF, JSRP1, ARG2, RGS2, RNF207, HSBP1, RYR1, TPM3, LTB4R, SRI, TMEM38A, ATP1A1, PTGS2, ARHGEF11, KCNE3, SETD3, EDN1, MYL…
GOBP	GOBP_CHROMATIN_REMODELING	1.37665e-06	4.02382e-05	0.643552	-0.354413	-1.82412	174	BRD2, ZBTB1, SMARCA5, TSPYL2, NAP1L2, TSPYL1, GATAD1, ACTR8, HJURP, KAT6A, SPTY2D1, MTA3, TTI1, GATA3, KDM4C, NFRKB, EZH1, MTA2, VPS72, BRD3, TSPYL4, TADA2B, CHRAC1, GRWD1, MORC2, SMARCD1, NPM1, ASF1A, HCFC2, HDAC1, PAF1, ARID2, HDAC2, SETD2, SART3, KAT6B, SUV39H2, KDM5B, NAP1L5, CENPP, ACTR5, SMARCE1, POLE3, SMARCA2, DNAJC9, YEATS4, HNRNPC, CTCF, PIWIL1, GATAD2B, TSPYL5, SHPRH, SUPT16H, MLLT1, M…
GOBP	GOBP_ICOSANOID_METABOLIC_PROCESS	1.3981e-06	4.0768e-05	0.643552	0.559393	2.13058	62	ALOX5, PTGES, TBXAS1, ALOX5AP, TNFRSF1A, DAGLB, TLR2, DAGLA, MGST2, LTA4H, AKR1C1, CBR1, ALOX12, GSTP1, IL1B, CYP1B1, MGST3, ABCC1, PTGDS, MGLL, PTGES2, FABP5, SYK, MAPKAPK2, GPX1, GGT5, PLA2G4A, CYP2J2, PTGS2
GOBP	GOBP_NUCLEOBASE_CONTAINING_COMPOUND_TRANSPORT	1.45236e-06	4.22482e-05	0.643552	-0.364128	-1.86214	171	G3BP2, SLC25A36, PHAX, NUP107, NUP160, SENP2, AHCTF1, CPSF6, NUP43, XPOT, NSUN2, TSC1, TGFBR2, ATXN2, SLC35B1, THOC3, POLDIP3, SMG5, FYTTD1, POLR2D, UPF2, RAE1, TOMM20, NUP54, NPM1, DHX9, SLC33A1, SMG7, LRRC8D, PCID2, RFTN1, CHTOP, SLC25A4, NUP35, NXF1, SETD2, KPNB1, CKAP5, SMG6, AKAP8L, SLC25A42, XPO5, ALKBH5, NUP42, ZC3H11A, RTRAF, SLC25A51, P2RX7, XPO1, UPF1, SLC35A1, MRPL18, SLC35B3, SIDT1, S…
GOBP	GOBP_REGULATION_OF_PROTEIN_PHOSPHORYLATION	1.45576e-06	4.22482e-05	0.643552	0.307315	1.53636	734	CLU, MARCO, NRG1, CX3CR1, S100A12, ENG, FCGR1A, FGR, TREM2, FAM20A, LILRA5, SPHK1, NRP1, PLAUR, SLC11A1, THBS1, OSM, MVP, NOD2, FPR2, PYCARD, TNFRSF1A, LILRB4, CD300A, GPRC5A, ZFYVE28, AIF1, HES1, IRAK3, HFE, LRP1, CLEC7A, DUSP6, DAB2, PLXNB2, PRKAR2B, IL18, LIF, TEK, AZU1, TRIB1, FLOT1, HGF, FN1, CAMKK2, SPRED1, LYN, ACSL1, GPNMB, SRC, TNFRSF11A, C5AR1, MMP9, SDCBP, PTPN1, SPRY1, HBEGF, NPTN, SP…
KEGG	KEGG_CHEMOKINE_SIGNALING_PATHWAY	1.4623e-06	4.23376e-05	0.643552	0.446093	1.9509	142	PPBP, CCL23, CX3CR1, CCR2, HCK, FGR, CXCL1, GNB4, CCL2, CCL20, CXCL16, CCL3, CXCL3, LYN, CCL8, PXN, PF4V1, CCR1, PF4, PLCB1, CCL7, CXCL6, PRKACA, ARRB1, NCF1, GNG11, ADCY4, PRKCD, PAK1, CXCL14, CXCR1, GNB1, GNG5, GRK3, PTK2, PARD3, CCR5, CXCL8, STAT3, PLCB2, GNB2, VAV3, MAPK3, PIK3CB, AKT1, RAP1A, PLCB3, SOS1, GNAI1, ARRB2, GRK6
GOBP	GOBP_POSITIVE_REGULATION_OF_MONOCYTE_CHEMOTAXIS	1.63763e-06	4.7302e-05	0.643552	0.817074	2.27422	15	CX3CR1, CCR2, FPR2, AIF1, LGMN, SERPINE1, CCR1, PLA2G7, MOSPD2, CREB3, ANO6
REACTOME	REACTOME_DISEASES_OF_IMMUNE_SYSTEM	1.71029e-06	4.92846e-05	0.643552	0.686445	2.20884	28	TLR5, S100A9, S100A8, LY96, TLR2, CD14, TLR4, CD36, TLR6, TLR1, UNC93B1, MYD88, TICAM1
REACTOME	REACTOME_IRAK4_DEFICIENCY_TLR2_4	1.72458e-06	4.95797e-05	0.643552	0.816323	2.27213	15	S100A9, S100A8, LY96, TLR2, CD14, TLR4, CD36, TLR6, TLR1, MYD88, BTK
GOBP	GOBP_SIGNAL_RELEASE	1.74938e-06	5.01748e-05	0.643552	0.387097	1.81223	266	ADM, ALOX5, WLS, TRPM4, PTGES, NIBAN2, GLUL, ABCC4, OSM, MCTP1, RETN, ICA1, HFE, CTBP2, STX11, P2RX1, DAB2, SEPTIN5, FKBP1B, LIF, GPR27, LYN, KCNQ1, TNFRSF11A, IL1RN, TCIRG1, BRSK2, UNC13B, IL1A, ATP2A2, ADORA2B, HIF1A, BMP6, TCF7L2, SYN1, RAB11FIP5, PPFIA3, STX1A, IL1B, SLC8B1, P2RY1, PPT1, PIM3, FFAR4, RIMS3, APBA1, PDZD11, CALM3, TRPM2, SYK, KLF7, RAB11FIP1, CHD7, VPS35, IL6, SPP1, TNF, CDK5, …
GOBP	GOBP_SMALL_MOLECULE_BIOSYNTHETIC_PROCESS	1.75367e-06	5.01803e-05	0.643552	0.351118	1.68592	362	ABCG4, ADM, ALOX5, PTGES, PTAFR, GLUL, TBXAS1, SPTSSA, DPYD, ALOX5AP, SPHK1, SLC1A3, CYP39A1, ALDH1A1, DAGLB, PCBD1, HACD4, DAB2, SPTLC2, CHST15, ASAH1, GATM, G6PD, DGAT2, LPL, MGST2, SERINC5, PGD, NR1H3, CTH, DHRS9, LTA4H, CBR1, SC5D, KYNU, ELOVL7, BMP6, ALOX12, LPCAT3, PLEK, MTHFR, GSTP1, IL1B, PMVK, P2RY1, PLOD3, ACER2, IDO1, MTHFD1L, SRD5A3, ACOT8, MGST3, MTHFD2L, PTPN2, SORD, PTGDS, ABHD2, M…
GOBP	GOBP_CELLULAR_RESPONSE_TO_AMYLOID_BETA	1.77712e-06	5.06928e-05	0.643552	0.647638	2.19564	36	TREM2, FCGR2B, FPR2, CASP4, LRP1, LGMN, TLR4, CD36, TLR6, APP, EPHB2, ADRB2, ICAM1, ABCC1, TNF, CDK5, PSEN1
REACTOME	REACTOME_G_ALPHA_I_SIGNALLING_EVENTS	1.77986e-06	5.06928e-05	0.643552	0.43778	1.94104	157	PPBP, CCL23, CX3CR1, CCR2, FPR3, FPR1, RGS18, FPR2, PSAP, CXCL1, GNB4, CCL20, CXCL16, PRKAR2B, CAMKK2, CXCL3, SRC, C5AR1, C3AR1, P2RY13, P2RY12, CCR1, PF4, GNAQ, PLCB1, OXER1, RGS17, CXCL6, PRKACA, RGS19, HEBP1, APP, GNG11, ADCY4, GNA15, PDE1B, PRKCD, C3, PPP2CB, CXCR1, GNB1, GNG5, CDK5, GNA11, PDE1A, CCR5, CXCL8, PLCB2, PLA2G4A, SUCNR1, GNB2
GOBP	GOBP_PROTEIN_PROCESSING	1.81055e-06	5.14474e-05	0.643552	0.429055	1.90954	163	LDLRAD3, PLAU, THBS1, CASP4, PYCARD, PCSK6, CTSL, ENO1, LGMN, NOL3, CASP1, SERPINE1, CTSS, SRC, CPM, NLRC4, VSIR, COMP, CD5L, PRKACA, BACE2, LPCAT3, F3, CASP6, ANXA2, APAF1, ERO1A, FURIN, DPP4, GSN, PLA2G7, ADAM8, PGK1, ADAM19, PSENEN, CTSZ, IL1R2, TMEM208, NCSTN, ADAM17, PSEN1, CASP7, ATP6AP2, SERPINE2, IFI16, SEC11C, DHH, CAST, CAPN2, RIPK2, BAD, CTSH, FXN, HM13, S100A10
GOBP	GOBP_SISTER_CHROMATID_SEGREGATION	1.83064e-06	5.18977e-05	0.643552	-0.365001	-1.86999	172	RIOK2, CHAMP1, SMARCA5, CDC23, STAG1, HNRNPU, PIBF1, MIS12, WAPL, STAG2, MRE11, RAD21, BUB3, NUMA1, ZW10, TOP2B, DSN1, EML3, AXIN2, LATS1, CUL3, CDC26, PTTG1, PCID2, PDS5B, PDS5A, MAU2, KPNB1, SFPQ, ZNF207, MAD2L1BP, AKAP8L, VPS4B, KIF22, BOD1, ATM, APC, AKAP8, CENPC, RAD51C, SLF2, CTCF, KMT5A, CDK5RAP2, ANAPC1, MAD2L1, ANAPC4, POGZ, LCMT1, MCMBP, STAG3, NUP62, RAN, CHMP2B, DIS3L2, PINX1, PSMG2, …
GOBP	GOBP_CELL_CYCLE_PROCESS	1.94768e-06	5.50882e-05	0.627257	-0.229884	-1.39521	910	RIOK2, KIZ, SBDS, CHAMP1, SMARCA5, TUBE1, CEP76, LRP5, GFI1, XPC, PLRG1, ODF2, CDC23, TAF1, PPM1D, WAC, SYF2, SKP2, STAG1, BTN2A2, HNRNPU, PIBF1, USP47, GADD45A, CCNG2, FBXL3, ZFP36L2, YTHDC2, MIS12, CCSAP, TERB1, USH1C, SIRT1, JADE1, SENP2, AHCTF1, ANK3, DYRK3, RGCC, MDM1, RBL2, CDK13, PLK2, TDRD12, LSM14A, LPIN1, CEP135, WAPL, RPA2, STAG2, TERF2, EHMT2, TUBGCP3, GSPT1, NSUN2, SUN2, APBB1, MTA3,…
GOBP	GOBP_INFLAMMATORY_RESPONSE_TO_ANTIGENIC_STIMULUS	2.01e-06	5.66826e-05	0.627257	0.597183	2.1774	48	FCGR1A, HCK, FGR, TREM2, FCGR2B, NOD2, CD68, RHBDF2, NOTCH2, LYN, IL10, SRC, IL1RN, TREX1, YES1, FUT7, FURIN, NOTCH1, C3, SYK, GPX1, TNF
REACTOME	REACTOME_CELLULAR_RESPONSE_TO_CHEMICAL_STRESS	2.0133e-06	5.66826e-05	0.627257	0.451689	1.94858	133	SOD2, HMOX1, NCF2, BLVRB, NCF4, CYBB, COX6B1, RXRA, NCF1, GSTP1, NLRP3, CYBA, PRDX5, ERO1A, PSMD13, ABCC1, PRDX3, PRKCD, PSMB3, BLVRA, GPX1, NFE2L2, COX4I1, RBX1, PSMB5, PSMB6, ATOX1, PSME2, CSNK2A2, PRDX1, PSMD1, NCOR1, STAT3, COX19, TXN2, TXNRD1, PSMB9, SEM1, GSR, P4HB, KEAP1, PSMD2, SURF1, HM13, COX5A, PSMC1, PSMB7, PSME4, NCOR2, CAT, PSMB2, COX8A, PSMD14, PSMB10, SOD1, PSMB4, PSMA5, ATP7A, BA…
bioplanet	bioplanet_Antigen processing: cross presentation	2.0887e-06	5.86703e-05	0.627257	0.55042	2.11742	65	FCGR1A, ITGB5, NCF2, ITGAV, NCF4, CTSS, CYBB, CD36, MRC2, NCF1, MRC1, CYBA, PSMD13, PSMB3, PSMB5, PSMB6, PSME2, PSMD1, PSMB9, CALR, SEC61B, PSMD2, SEC61A1, PSMC1, PSMB7, PSME4, PSMB2, PSMD14, PSMB10, PSMB4, PSMA5, PDIA3, PSMB8, PSMA4, PSMD4
bioplanet	bioplanet_Spliceosome	2.13071e-06	5.9629e-05	0.627257	-0.40823	-1.98801	111	PLRG1, SYF2, HNRNPU, WBP11, PRPF38A, BCAS2, SRSF8, SF3B4, SRSF6, SF3B1, SRSF2, THOC3, EIF4A3, BUD31, CDC5L, HNRNPK, SRSF5, SNRPB2, PRPF4, PPIE, DDX23, DHX8, SF3A1, SF3B3, U2SURP, RBM8A, SNRNP27, SLU7, HNRNPC, SNRNP70, PRPF18, XAB2, HNRNPM, PRPF6, SNRPB, PHF5A, TRA2B, SNRNP40, PRPF38B, CWC15, SRSF10, DHX16, PRPF19, DDX5, ALYREF, LSM4, SNW1, SMNDC1, PRPF8, DHX15, HSPA8, CRNKL1, SRSF1, PRPF40B
GOBP	GOBP_AUTOCRINE_SIGNALING	2.13256e-06	5.9629e-05	0.627257	0.993206	1.64865	3	CX3CR1, S100A9, S100A8
GOBP	GOBP_NEGATIVE_REGULATION_OF_APOPTOTIC_SIGNALING_PATHWAY	2.18426e-06	6.07968e-05	0.627257	0.422693	1.89613	176	CLU, CX3CR1, SOD2, VNN1, HMOX1, LGALS3, NRP1, PLAUR, THBS1, ENO1, ITGAV, NOL3, SERPINE1, HGF, SRC, MMP9, PTPN1, PF4, CTH, IL1A, WFS1, HIF1A, TCF7L2, PTTG1IP, MDM2, CTNNA1, CTTN, GSTP1, IL1B, YBX3, PRELID1, ICAM1, BCL2L1, TGFBR1, TMBIM6, PPIF, ARMC10, PELI3, HTT, GPX1, NFE2L2, TNF, PSEN1, CSNK2A2, ACVR1, PPIA, CDKN2D, SNAI1, CREB3, NDUFS3, PTGS2, TMBIM1, PIK3CB, CD44, SLC35F6, AKT1, MEIS3, VDAC2, …
GOBP	GOBP_PROTEIN_DNA_COMPLEX_ASSEMBLY	2.1831e-06	6.07968e-05	0.627257	-0.405691	-2.01054	119	BRD2, SMARCA5, TSPYL2, NAP1L2, TSPYL1, TAF1, MIS12, HJURP, KAT6A, SPTY2D1, CAND1, BRF2, TBP, TSPYL4, CHRAC1, GRWD1, UBTF, NPM1, TAF8, ASF1A, TERF1, ATF7IP, SENP6, SART3, THRA, TP53, KAT6B, TAF11, TAF7, NAP1L5, CENPP, CENPC, BRF1, RAD51C, POLE3, DNAJC9, TSPYL5, SHPRH, TAF5, TCF4, MIS18A, TAF6L, POGZ, TAF2, TAF1C, H4C2, TAF3, RNF4, SMYD3, GTF2B
bioplanet	bioplanet_Interactions of HIV Vpr protein with host cellular proteins	2.19123e-06	6.08526e-05	0.627257	-0.611461	-2.32037	35	NUP107, KPNA1, NUP160, NUP43, RAE1, NUP54, NPM1, PSIP1, SLC25A4, NUP35, KPNB1, XPO1, NUP88, NUP155, RANBP2, NUP62, RAN, RANGAP1, NUP133, NUP210
GOBP	GOBP_PROTEIN_POLYUBIQUITINATION	2.26841e-06	6.28536e-05	0.627257	-0.34724	-1.8236	202	TNFAIP3, TPP2, BIRC2, MARCHF5, HECTD1, CDC23, TAF1, SKP2, SMURF2, RNF26, KLHL3, RMND5A, UBE2J1, ITCH, SPOP, TOPORS, UBE2O, AMBRA1, FBXO28, NEDD4, FBXO38, KBTBD7, UBE3C, MUL1, PPIL2, MARCHF8, MKRN2, AXIN1, RNF146, BTRC, PTPN22, RNF6, CUL3, ARIH2, MGRN1, CDC26, DDX3X, RC3H2, RFFL, UBE4A, RNF144A, CUL1, AKTIP, RNF187, PELI1, TRIM21, IRF2BP1, TNKS2, TRIM32, UBE3B, TRAF3IP2, UBE2S, WSB1, RNF216, RNF11…
REACTOME	REACTOME_ION_CHANNEL_TRANSPORT	2.40583e-06	6.65106e-05	0.627257	0.486757	2.02283	102	TRPM6, TRPM4, STOM, ATP6V0D2, FKBP1B, ATP6V1A, TCIRG1, TPCN2, ATP6V0D1, TTYH3, CLCN5, ATP2A2, SGK1, ATP2C1, ATP6V0A1, ATP11A, ATP8B4, BEST1, ATP1B3, PDZD11, ATP6V1D, TRPM2, TTYH2, ATP6AP1, ATP6V1B2, MCOLN1, RYR1, ATP6V0E1, ANO8, SRI, ANO10, ANO6, ATP1A1, CLCN6, CLCN2, ATP9B, ATP6V1H, WNK3, RIPK1, ASPH, ATP1B1, ATP7A, SCNN1A, ATP2B1, ATP9A, ATP13A1, SLC9B2
GOBP	GOBP_NEGATIVE_REGULATION_OF_CELL_DEATH	2.47469e-06	6.82601e-05	0.627257	0.313935	1.5636	644	CLU, CX3CR1, NIBAN2, RNF144B, SOD2, HCK, VNN1, TNIP2, TREM2, HMOX1, LGALS3, SPHK1, NRP1, PLAUR, THBS1, MERTK, NOD2, DAPK1, TIMP1, GRN, AIF1, GATA2, CCL2, BCL3, ENO1, ITGAV, LGMN, NOL3, NAIP, DAB2, NOTCH2, SERPINE1, TEK, AZU1, HGF, IL10, GPNMB, SRC, MMP9, PTPN1, PRKCI, TNFRSF1B, SLC46A2, ANXA5, SOCS2, PF4, VEGFA, CTH, COMP, IL1A, CSF1R, WFS1, KLF4, HIF1A, TCF7L2, TWIST2, ALOX12, PTTG1IP, MDM2, CTN…
GOBP	GOBP_CELL_JUNCTION_ORGANIZATION	2.5253e-06	6.94996e-05	0.627257	0.342707	1.65889	406	NRG1, CX3CR1, CD9, CYFIP1, TREM2, FCGR2B, NRP1, THBS1, ITGAM, CLDN5, VCL, IL1RAP, BAIAP2, CTBP2, LGMN, TLR2, LAMC1, PLXNB2, TEK, FLOT1, FN1, IL10, SRC, C5AR1, SDCBP, PRKCI, UNC13B, NPTN, ITGA2, ABI3, RAB13, C1QB, ZNF703, VMP1, MTSS1, SEMA4A, VEGFA, LRTM2, CSF1R, C1QC, BMP6, ARHGAP6, LAMTOR2, SYN1, PRKACA, CTNNA1, FARP1, CTTN, EPB41L3, APP, PPFIA3, EPHB2, IL1B, CORO1C, CFL1, GJB2, PGRMC1, C3, GJB6…
GOBP	GOBP_CERAMIDE_METABOLIC_PROCESS	2.61641e-06	7.18457e-05	0.627257	0.530288	2.07703	72	SPTSSA, SPHK1, UGCG, P2RX1, SPTLC2, ASAH1, B4GALNT1, B4GALT5, PLA2G15, ACER2, FUT7, NAGA, SGMS2, HEXB, PRKCD, HEXA, GBA, SMPD2, ST8SIA4, CERS2, SMPD3, ST6GALNAC4, ST3GAL2, PLA2G6, CLN8, ST6GALNAC3, CERK, GLA, ORMDL2, GM2A, B3GALT4, PPP2R1A, SMPD4, B4GALT4, PLPP1, NEU1, ACER3, ALOXE3, TM9SF2
GOBP	GOBP_MUSCLE_SYSTEM_PROCESS	2.67825e-06	7.33794e-05	0.627257	0.38386	1.7914	248	MYH14, TRPM4, PTAFR, HTR7, HMOX1, SPHK1, TNFRSF1A, DOCK4, AIF1, ENO1, P2RX1, NOL3, GUCY1A1, FKBP1B, TIFAB, DOCK5, GATM, MYOF, KCNQ1, G6PD, TNFRSF1B, ITGA2, TPCN2, STAC3, COMP, MYLK, ATP2A2, ADORA2B, TPM4, DES, PRKACA, CTTN, SLC8A1, IL1B, CYBA, MAP2K3, P2RY1, GSTO1, MYL9, NOTCH1, GAA, ADRB2, EHD3, GSN, ACTA1, TMEM38B, SCN1B, CALM3, KCNJ2, MYL6B, ARHGAP42, TNF, JSRP1, ARG2, RGS2, RNF207, HSBP1, RYR…
GOBP	GOBP_REGULATION_OF_TRANSPORTER_ACTIVITY	2.69312e-06	7.36221e-05	0.627257	0.42692	1.90079	160	PTAFR, CCR2, TREM2, STOM, DAPK1, IFNGR2, CCL2, FKBP1B, CTSS, KCNQ1, MMP9, GEM, VMP1, NR1H3, STAC3, GPR35, SLC6A9, RXRA, YWHAE, SGK1, PRKACA, APP, EPHB2, CBARP, GSTO1, ADRB2, ATP1B3, CAPN1, EHD3, PRKCD, SCN1B, CALM3, PPIF, HTT, JSRP1, RNF207, ANTKMT, CDK5, GLRX, PDZK1, P2RY6, FKBP1A, CTTNBP2NL, CNKSR3, SRI, AHNAK, KCNE3, OXSR1, ACTB, EDN1, SCN3B, PLA2G6, SLC9A1, SLC5A11, RASGRF1, COX17, ITGB1, WNK…
REACTOME	REACTOME_DETOXIFICATION_OF_REACTIVE_OXYGEN_SPECIES	2.70682e-06	7.38318e-05	0.627257	0.678845	2.18438	28	SOD2, NCF2, NCF4, CYBB, NCF1, GSTP1, CYBA, PRDX5, ERO1A, PRDX3, GPX1, ATOX1, PRDX1, TXN2, TXNRD1, GSR, P4HB, CAT
KEGG	KEGG_SPLICEOSOME	2.73468e-06	7.43874e-05	0.627257	-0.412668	-2.01269	112	PLRG1, SYF2, HNRNPU, WBP11, PRPF38A, BCAS2, SRSF8, SF3B4, SRSF6, SF3B1, SRSF2, THOC3, EIF4A3, BUD31, CDC5L, HNRNPK, SRSF5, SNRPB2, PRPF4, PPIE, SNU13, DDX23, DHX8, SF3A1, SF3B3, U2SURP, RBM8A, SNRNP27, SLU7, HNRNPC, SNRNP70, PRPF18, XAB2, HNRNPM, PRPF6, SNRPB, PHF5A, TRA2B, SNRNP40, PRPF38B, CWC15, SRSF10, DHX16, PRPF19, DDX5, ALYREF, LSM4, SNW1, SMNDC1, PRPF8, DHX15, HSPA8, CRNKL1, SRSF1, PRPF40B
GOBP	GOBP_NERVOUS_SYSTEM_PROCESS	2.74459e-06	7.43874e-05	0.627257	0.32086	1.5779	528	MYH14, MYO7A, CX3CR1, PTGES, PTAFR, CCR2, SOD2, CYFIP1, TREM2, SLC1A3, SCARB2, GSDME, LDLR, CLDN5, PGAP1, BAIAP2, CCL2, CTSC, P2RX1, FOSL1, LGMN, TLR2, NPTX2, TMEM150C, PRKAR2B, FKBP1B, TIFAB, COCH, GATM, HGF, CCL3, NRGN, IL10, KCNQ1, SRC, C5AR1, TNFRSF1B, UNC13B, NPTN, CD36, ITGA2, TNFRSF21, STAC3, COMP, PLCB1, IL1A, GPR35, TGFBI, WFS1, PITPNA, HIF1A, NR2F6, GRIN2C, SGK1, CEBPB, TULP2, APP, EPHB…
HALLMARK	HALLMARK_CHOLESTEROL_HOMEOSTASIS	2.74542e-06	7.43874e-05	0.627257	0.557292	2.11657	58	CLU, CD9, LGALS3, PLAUR, ALCAM, LDLR, CXCL16, LGMN, JAG1, NFIL3, ETHE1, LPL, PLSCR1, ANXA5, ACSS2, SC5D, FBXO6, PMVK, NIBAN1, FABP5, ACTG1, ATF3, S100A11, SREBF2, FASN, GNAI1, FADS2
bioplanet	bioplanet_Signaling by GPCR	2.77587e-06	7.50466e-05	0.627257	0.365076	1.73027	307	PPBP, CCL23, ADM, CX3CR1, PTAFR, CCR2, P2RY2, HTR7, FPR3, FPR1, RGS18, FPR2, CXCL1, DAGLB, GNB4, CCL2, CCL20, CXCL16, PRKAR2B, CCL3, CXCL3, PTGER2, DAGLA, C5AR1, C3AR1, P2RY13, HBEGF, P2RY12, ITSN1, CCR1, PF4, GNAQ, C5AR2, PLCB1, OXER1, ADORA2B, RGS17, CCL7, CXCL6, PRKACA, RGS19, HEBP1, APP, GNG11, ADCY4, P2RY1, GNA15, PDE1B, FFAR4, ADRB2, PDE8A, HRH2, PTGIR, PRKCD, C3, RHOB, FGD4, MGLL, PPP2CB, …
bioplanet	bioplanet_TWEAK regulation of gene expression	2.8043e-06	7.56483e-05	0.627257	0.754841	2.25673	20	MMP1, TNFSF12, CCL2, SERPINE1, CCL3, MMP9, F3, ICAM1, BCL2L1, IL6, SPP1, TNF, CXCL8
GOBP	GOBP_NEGATIVE_REGULATION_OF_RESPONSE_TO_STIMULUS	2.85738e-06	7.69105e-05	0.627257	0.284029	1.43742	1101	CLU, ADM, ALOX5, CX3CR1, CD9, NIBAN2, CCR2, TFPI, SOD2, HCK, VNN1, FGR, TREM2, MEFV, PLAU, HMOX1, RGS18, LGALS3, GRB10, FCGR2B, NRP1, PLAUR, EGFL7, THBS1, PTPN18, MVP, NOD2, HTRA1, FPR2, MCTP1, TNFAIP6, TMEM170B, HLX, PYCARD, TNFRSF1A, LILRB4, CD300A, SPI1, GPRC5A, LDLR, ZFYVE28, GRN, AIF1, GATA2, FGL2, CCL2, IRAK3, HFE, IGFBP4, LRP1, BCL3, CAVIN3, ENO1, CD300LF, ITGAV, LGMN, NOL3, DUSP6, NAIP, D…
HALLMARK	HALLMARK_MTORC1_SIGNALING	2.95536e-06	7.93734e-05	0.627257	0.415976	1.8708	180	CD9, HK2, LDLR, FGL2, CTSC, ENO1, MTHFD2, LGMN, IFI30, IDH1, NFIL3, G6PD, SKAP2, CFP, CTH, ATP2A2, LTA4H, SLC6A6, SC5D, AK4, LDHA, BHLHE40, MAP2K3, GAPDH, NIBAN1, CDKN1A, ERO1A, PSMD13, MTHFD2L, SORD, TPI1, PGK1, ATP6V1D, FKBP2, PSMB5, EIF2S2, PFKL, GLRX, SDF2L1, ITGB2, INSIG1, PRDX1, PPIA, NUFIP1, GBE1, SLC1A5, TXNRD1, CALR, GSR, CANX, SLC7A11, FADS2, M6PR, FADS1, SLC7A5, TUBG1, GLA, HSPD1, SCD,…
GOBP	GOBP_PHOSPHOLIPASE_C_ACTIVATING_G_PROTEIN_COUPLED_RECEPTOR_SIGNALING_PATHWAY	2.98349e-06	7.98086e-05	0.627257	0.582792	2.12135	50	CX3CR1, P2RY2, FPR3, FPR1, FPR2, GPR27, C5AR1, C3AR1, P2RY12, C5AR2, GPR35, CMKLR1, P2RY1, GNA15, FFAR4, GPR157, GNB1, GNA11, P2RY6, LTB4R, PLCB2, TGM2, F2RL2
REACTOME	REACTOME_NERVOUS_SYSTEM_DEVELOPMENT	2.9846e-06	7.98086e-05	0.627257	0.338638	1.63997	410	MYH14, TREM2, GRB10, NRP1, COL9A2, ALCAM, MAPK11, FES, AP2A1, ITGAV, LAMC1, LYN, GFRA3, SRC, MMP9, SDCBP, ITGA2B, TYROBP, ITSN1, TUBB1, DNM1, ITGA2, PLXNC1, SEMA4A, PITPNA, GAB2, MYL12B, YES1, ITGA9, PRKACA, LYPLA2, EPHB2, ARPC3, CFL1, MYL9, PSMD13, SHTN1, RHOB, PAK1, PSMB3, MYH10, SCN1B, RRAS, TLN1, PSENEN, NRP2, MMP2, TUBA8, ELOC, SDC2, ACTG1, NCSTN, PMP22, CLTB, CAP1, CDK5, PSEN1, RBX1, PSMB5,…
GOBP	GOBP_MRNA_EXPORT_FROM_NUCLEUS	3.14474e-06	8.39076e-05	0.627257	-0.538287	-2.22031	49	NUP107, NUP160, NSUN2, THOC3, POLDIP3, SMG5, FYTTD1, POLR2D, UPF2, RAE1, SMG7, PCID2, CHTOP, NXF1, SETD2, SMG6, AKAP8L, ALKBH5, ZC3H11A, UPF1, YTHDC1, NXT1, NUP88, NUP155, DDX39A, NUP133, GLE1, ALYREF, MCM3AP
GOBP	GOBP_ANTIGEN_PROCESSING_AND_PRESENTATION	3.26397e-06	8.68997e-05	0.627257	0.519353	2.03406	71	TREM2, FCGR2B, SLC11A1, THBS1, CTSD, NOD2, PYCARD, CD68, FGL2, HFE, CTSL, LGMN, IFI30, CTSS, FCER1G, TREX1, CLEC4A, RAB32, RAB10, RAB4A, ICAM1, RAB27A
GOBP	GOBP_NEUROGENESIS	3.31652e-06	8.81073e-05	0.627257	0.288289	1.45703	991	CLU, ADM, JAG2, EMB, ZFHX3, NRG1, MYO7A, CX3CR1, CD9, S100A9, NIBAN2, CCR2, SOD2, CYFIP1, TREM2, S100A8, NRP1, LST1, SLC1A3, FPR2, SCARB2, UGCG, SPINT1, ALCAM, GSDME, DAGLB, LDLR, GRN, VCL, HES1, GATA2, FES, BAIAP2, CCL2, LRP1, DAB2, TLR2, PLXNB2, NOTCH2, FKBP1B, LIF, HDGFL3, JAG1, TSPO, AZU1, FLOT1, HGF, FN1, B4GALT5, CCL3, LYN, GFRA3, KCNQ1, ETV6, DAGLA, C5AR1, RTN4RL2, SS18L1, PRKCI, TNFRSF1B,…
GOBP	GOBP_REGULATION_OF_DNA_METABOLIC_PROCESS	3.35275e-06	8.88769e-05	0.627257	-0.291181	-1.61654	326	HNRNPU, ACTR8, JADE2, PPP4R3B, PARG, CHTF18, KPNA1, IL7R, SIRT1, JADE1, WDR48, RGCC, RPA2, TERF2, EHMT2, ING3, RIF1, MRE11, GATA3, KAT7, POT1, WRNIP1, PIK3CA, BLM, RFC5, SMG5, NFRKB, TFRC, BRD8, UIMC1, VPS72, CD28, TBX21, HNRNPD, GINS3, MAP3K4, STN1, ERCC4, PCNA, TFIP11, AXIN2, EPC1, NPM1, SHLD3, DHX9, ZNF93, APLF, USP1, TERF1, FANCB, PRKD2, CYREN, ARID2, JADE3, SETD2, TERF2IP, SMG6, USP7, CCDC11…
GOBP	GOBP_REGULATION_OF_CELL_CYCLE_PROCESS	3.41732e-06	9.0393e-05	0.627257	-0.25944	-1.50543	512	RIOK2, SMARCA5, CEP76, LRP5, XPC, PLRG1, CDC23, TAF1, WAC, SYF2, BTN2A2, HNRNPU, USP47, ZFP36L2, CCSAP, SIRT1, JADE1, SENP2, AHCTF1, DYRK3, RGCC, MDM1, RBL2, CDK13, PLK2, WAPL, RPA2, TERF2, NSUN2, APBB1, MTA3, AMBRA1, MRE11, CCP110, RAD21, BUB3, APPL2, ROCK2, NUMA1, ZW10, CDKN1B, APBB2, PIK3R4, BLM, EME1, ETAA1, CENPJ, CDC7, UVRAG, UIMC1, CD28, IGF1, CDC5L, CEP120, EML3, AXIN2, RAE1, CDC73, RBM14…
GOBP	GOBP_REACTIVE_OXYGEN_SPECIES_METABOLIC_PROCESS	3.54867e-06	9.36651e-05	0.627257	0.44072	1.93673	149	ALOX5, SOD2, NCF2, THBS1, FPR2, HK2, ITGAM, CLEC7A, PRCP, NCF4, TSPO, CYBB, G6PD, ACOD1, TYROBP, TLR4, CD36, TLR6, AKR1C1, CBR1, HIF1A, ALOX12, NCF1, PID1, GSTP1, CYBA, CYP1B1, CDKN1A, PRDX5, PRDX3, PRKCD, RAB27A, SESN2, SYK, SLC18A2, GPX1, NFE2L2, TNF, ARG2, ITGB2, CD177, PDK4, PRDX1, SIRT2
GOBP	GOBP_POSITIVE_REGULATION_OF_CYTOKINE_PRODUCTION_INVOLVED_IN_INFLAMMATORY_RESPONSE	3.61671e-06	9.52557e-05	0.627257	0.767103	2.25232	19	NOD2, CARD9, CLEC7A, TLR4, TLR6, HIF1A, MYD88, TICAM1, IL6, TNF, STAT3
REACTOME	REACTOME_METAL_SEQUESTRATION_BY_ANTIMICROBIAL_PROTEINS	3.65896e-06	9.61409e-05	0.627257	0.992196	1.64698	3	S100A9, S100A8, LCN2
REACTOME	REACTOME_FATTY_ACID_METABOLISM	3.66602e-06	9.61409e-05	0.627257	0.45016	1.9177	122	ALOX5, PTGES, TBXAS1, ALOX5AP, HACD4, ACSL1, LTA4H, CBR1, RXRA, ELOVL7, ACAD10, ALOX12, DBI, CYP1B1, PPT1, ACOT8, THEM4, ABCC1, PTGDS, PTGES2, MAPKAPK2, ACAA1, GPX1, ACBD4, PON2, GGT5, ACADVL, ACSL4, ACOT9, ALDH3A2, HSD17B12, PLA2G4A, CYP2J2, DECR1, HACD2, CPT1B, PTGS2, PCTP, FASN, ACSF2, EPHX2, FADS2, HADHA, ECI1, FADS1, ACOX2, ACSL5, SCP2, PRXL2B, ACAA2, HADHB, CPT1A, ACOT13, SCD, DPEP1, PECR, …
GOBP	GOBP_ATP_METABOLIC_PROCESS	3.67957e-06	9.62899e-05	0.627257	0.404538	1.8256	189	NDUFS8, TREM2, HK3, HK2, ENO1, TSPO, ATP6V1A, GALK1, SLC2A6, TREX1, HIF1A, AK4, LDHA, APP, PID1, GAPDH, PGAM1, TPI1, PGK1, PPIF, NDUFV2, TNF, ANTKMT, ATP6V1B2, NDUFB7, COX4I1, PSEN1, PFKL, INSR, NDUFB2, HK1, MLXIPL, NDUFS6, NCOR1, NADK, ATP5F1E, ATP5F1D, NDUFA8, STAT3, NDUFS3, UQCRH, SDHC, ADPGK, PFKP, BAD, FXN, COX5A, HDAC4, BID, NDUFV1, AK2, ATP5MG, NDUFB3, RHOA, NDUFB8, VCP, ATP5PO, ARL2, NDUF…
GOBP	GOBP_INTERLEUKIN_10_PRODUCTION	3.75917e-06	9.81632e-05	0.627257	0.603299	2.18294	46	TREM2, LILRA5, FCGR2B, NOD2, PYCARD, LILRB4, BCL3, CLEC7A, TLR2, HGF, PDCD1LG2, TYROBP, TLR4, TNFRSF21, VSIR, IDO1, SYK, IL6, CD274, STAT3
GOBP	GOBP_ENDOTHELIAL_CELL_MIGRATION	3.8376e-06	9.98571e-05	0.610527	0.434957	1.91012	146	GLUL, HMOX1, NRP1, THBS1, ANXA3, TNFSF12, GRN, GATA2, S100P, LGMN, PRCP, TEK, SPRED1, S100A2, PXN, SASH1, RAB13, SEMA4A, VEGFA, LGALS8, KLF4, HIF1A, SPARC, MAP2K3, CYP1B1, NOTCH1, DPP4, RHOB, RIN2, TGFBR1, RRAS, CIB1, LPXN, NRP2, GPX1, ITGB1BP1, NFE2L2, TNF, ADAM17, CORO1B, PTK2, PLXND1, ADTRP, MIR29A, APOE, PTGS2, PIK3CB, CALR, AKT1, EDN1, NUS1, P2RX4, HSPB1, MET, RHOA, AAMP, EFNA1, ITGB1, SYNJ2…
GOBP	GOBP_REGULATION_OF_CELL_ADHESION_MEDIATED_BY_INTEGRIN	3.84034e-06	9.98571e-05	0.610527	0.635517	2.15455	36	PLAU, SERPINE1, LIF, LYN, P2RY12, ACER2, CYP1B1, FERMT3, DPP4, ADAM9, SYK, CIB1, LPXN, ITGB1BP1, PTK2, PTPN6, PODXL, PIEZO1, NCKAP1L, CRK, EFNA1
REACTOME	REACTOME_SUMOYLATION_OF_TRANSCRIPTION_COFACTORS	3.8688e-06	0.000100384	0.610527	-0.592845	-2.35526	40	MRTFA, NRIP1, UHRF2, TOPORS, ZNF350, PHC3, PIAS1, MBD1, PHC1, NPM1, PHC2, PIAS2, CBX8, ING2, SAFB, CBX4, NCOA1, NCOA2, CREBBP, PIAS3, TRIM28, SCMH1, ZNF131, DDX5, SIN3A, RNF2, CBX2, DAXX
GOBP	GOBP_ANTIGEN_PROCESSING_AND_PRESENTATION_OF_EXOGENOUS_PEPTIDE_ANTIGEN_VIA_MHC_CLASS_II	4.03508e-06	0.000104477	0.610527	0.818736	2.21801	13	FCGR2B, CTSD, CTSL, LGMN, IFI30, CTSS, FCER1G
GOBP	GOBP_REGULATION_OF_CELL_DIFFERENTIATION	4.07255e-06	0.000105225	0.610527	0.288682	1.45746	958	ADM, ALOX5, ZFHX3, NRG1, CX3CR1, TRPM4, ENG, NIBAN2, CCR2, AQP3, SOD2, VNN1, CYFIP1, TREM2, LGALS3, FCGR2B, NRP1, TMEM176B, VDR, MSR1, OSM, TNFAIP6, HLX, SPINT1, JDP2, TNFRSF1A, LILRB4, SPI1, LDLR, CLDN5, GRN, VCL, MAPK11, HES1, GATA2, FES, FGL2, BAIAP2, MTCH2, SCIN, ITGAV, CLEC7A, DAB2, TLR2, METRNL, PLXNB2, NOTCH2, CSF3R, IL18, SERPINE1, LIF, JAG1, DOCK5, TSPO, TRIB1, MAFG, HGF, FN1, NFAM1, CCL…
GOBP	GOBP_NEGATIVE_REGULATION_OF_IMMUNE_SYSTEM_PROCESS	4.10154e-06	0.000105751	0.610527	0.370293	1.74353	284	CX3CR1, CCR2, HCK, FGR, TREM2, HMOX1, LGALS3, FCGR2B, TMEM176B, THBS1, LST1, MERTK, NOD2, TNFAIP6, HLX, CD68, LILRB4, CD300A, SPI1, LDLR, GRN, GATA2, FGL2, CCL2, IRAK3, HFE, CD300LF, VSIG4, RHBDF2, TRIB1, CCL3, LYN, IL10, GPNMB, SRC, ACOD1, PDCD1LG2, MAFB, TYROBP, TLR4, TNFRSF21, VSIR, NR1H3, C5AR2, PLCB1, TREX1, C1QC, CDK6, CLEC4G, YES1, CEBPB, LOXL3, BCL6, IDO1, FURIN, DPP4, PTPN2, PHPT1, SYK, …
GOBP	GOBP_CELLULAR_LIPID_CATABOLIC_PROCESS	4.17251e-06	0.000107355	0.610527	0.427419	1.8828	152	PLBD1, SPHK1, SMPDL3A, DAGLB, LDLR, IDH1, ASAH1, AOAH, FUCA1, DAGLA, PLA2G15, LPL, MGST2, PLCB1, ACAD10, IVD, LYPLA2, ACER2, CYP1B1, PPT1, NAGA, HEXB, SRD5A3, ACOT8, PRKCD, ABHD2, MGLL, PLA2G7, ENPP2, SESN2, ACAA1, HEXA, GBA, SMPD2, ACADVL, PNPLA6, PLBD2, ADTRP, ABHD1, SIRT2, PLA2G4A, ABHD16A, ABHD5, DECR1, CPT1B, PCK2, MFSD2A, AKT1, SMPD3, SLC27A4, ABHD16B, HADHA, PLA2G6, ECI1, ACOX2, ABHD3, SCP…
REACTOME	REACTOME_PURINERGIC_SIGNALING_IN_LEISHMANIASIS_INFECTION	4.19254e-06	0.000107644	0.610527	0.749463	2.24065	20	MEFV, HMOX1, PYCARD, ENTPD1, CASP1, IL18, C3AR1, IL1A, GSDMD, APP, IL1B, NLRP3, C3
GOBP	GOBP_REGULATION_OF_APOPTOTIC_SIGNALING_PATHWAY	4.274e-06	0.000109506	0.610527	0.367654	1.72897	280	CLU, CX3CR1, S100A9, SOD2, VNN1, TREM2, S100A8, HMOX1, LGALS3, NRP1, PLAUR, THBS1, PYCARD, TNFSF12, GSDME, CTSC, ENO1, ITGAV, NOL3, G0S2, SERPINE1, LTBR, HGF, NACC2, SRC, MMP9, PTPN1, PF4, CTH, IL1A, STK3, WFS1, HIF1A, TCF7L2, PTTG1IP, MDM2, CTNNA1, CTTN, GSTP1, STYXL1, IL1B, YBX3, APAF1, PRELID1, PTPN2, ICAM1, PRKCD, BCL2L1, TGFBR1, TMBIM6, PPIF, ARMC10, PELI3, HTT, GPX1, NFE2L2, ATF3, TNF, PSEN…
GOBP	GOBP_REGULATION_OF_CALCIUM_ION_TRANSPORT	4.4516e-06	0.000113818	0.610527	0.433285	1.90278	146	LGALS3, LILRA5, HES1, CCL2, P2RX1, FKBP1B, TSPO, CCL3, LYN, G6PD, CCR1, GEM, VMP1, STAC3, MYLK, GPR35, WFS1, YWHAE, PRKACA, SLC8A1, SLC8B1, CYBA, CBARP, CAPN3, LILRA2, GSTO1, BEST1, EHD3, TMEM38B, CALM3, SESTD1, TMBIM6, HTT, CHD7, JSRP1, CDK5, CRACR2B, VDAC1, SLC30A1, P2RY6, FKBP1A, PTPN6, SRI, TMEM38A, AHNAK, PTGS2, CEMIP, ARRB2, P2RX4, PLA2G6, SLC9A1
GOBP	GOBP_RESPONSE_TO_TUMOR_NECROSIS_FACTOR	4.63341e-06	0.00011822	0.610527	0.422592	1.88152	160	CCL23, SPHK1, THBS1, CASP4, PYCARD, TNFRSF1A, GSDME, HES1, CCL2, CCL20, CXCL16, NOL3, NAIP, CASP1, ASAH1, CD14, CCL3, TNFRSF11A, ACOD1, CCL8, TNFRSF1B, TNFSF13B, TNFRSF21, CEBPA, CCL7, PID1, GSTP1, CYBA, YBX3, CYP1B1, GAS6, TXNDC17, PTPN2, ADAM9, PPP2CB, CAMP, SYK, CIB1, PELI3, NFE2L2, TNF, ADAM17, GBA, AIM2, CXCL8, ILK, PLVAP, PCK2, PTGS2, CD58, MAPK3, AKT1, SMPD3, CD70, HYAL3, EDN1
GOBP	GOBP_RESPONSE_TO_INORGANIC_SUBSTANCE	4.66811e-06	0.000118857	0.610527	0.351199	1.68239	341	AQP3, SOD2, AQP9, S100A8, HMOX1, ALOX5AP, GUCY1B1, SPHK1, THBS1, CYBRD1, KCNMB1, HFE, FOSL1, LGMN, FKBP1B, CD14, TSPO, HGF, CYBB, IL10, G6PD, SRC, MMP9, PLSCR1, TCIRG1, CD36, NUDT1, CEBPA, CPNE2, PLCB1, IL1A, TREX1, LTA4H, MT1X, HIF1A, BMP6, MT2A, NCF1, IQGAP1, APP, SLC8A1, CAPN3, LRP11, CYP1B1, ANXA11, SLC25A24, MAP1LC3A, ZNF277, SORD, PDE8A, ADAM9, PRDX3, PRKCD, ACTA1, RHOB, PAM, PLEC, PPP2CB, …
REACTOME	REACTOME_ARACHIDONIC_ACID_METABOLISM	4.69721e-06	0.000119234	0.610527	0.653248	2.19405	33	ALOX5, PTGES, TBXAS1, ALOX5AP, LTA4H, CBR1, ALOX12, CYP1B1, ABCC1, PTGDS, PTGES2, MAPKAPK2, GPX1, PON2, GGT5, PLA2G4A, CYP2J2, PTGS2, EPHX2
GOBP	GOBP_POSITIVE_REGULATION_OF_DNA_BINDING_TRANSCRIPTION_FACTOR_ACTIVITY	4.70236e-06	0.000119234	0.610527	0.397159	1.79742	194	CLU, CX3CR1, S100A12, S100A9, S100A8, SPHK1, STING1, NOD2, ANXA3, PYCARD, CARD9, IL1RAP, IRAK3, FOSL1, CLEC7A, TLR2, IL18, FLOT1, NFAM1, IL10, TNFRSF11A, PRKCI, TLR4, CD36, NLRC4, VEGFA, TLR6, CTH, STK3, TRIM5, APP, IL1B, NLRP3, CAPN3, MYD88, TICAM1, PRDX3, ADAM8, CIB1, HCLS1, IL6, ARID5B, TNF, PPARGC1B, MTDH, AIM2, PPIA, RPS6KA4, STAT3, SMARCA4, BTK, IL18RAP, SLCO3A1, MTPN, RIPK2, AKT1, EDN1, HD…
KEGG	KEGG_HUNTINGTONS_DISEASE	4.73651e-06	0.000119851	0.610527	0.445173	1.90737	125	NDUFS8, SOD2, CREB5, AP2A1, COX6B1, GNAQ, PLCB1, HIP1, APAF1, HTT, IFT57, GPX1, NDUFV2, CLTB, NDUFB7, COX4I1, POLR2G, RCOR1, VDAC1, NDUFB2, NDUFS6, ATP5F1E, ATP5F1D, NDUFA8, PLCB2, TGM2, CREB3, NDUFS3, UQCRH, DCTN2, SDHC, AP2M1, AP2S1, VDAC2, PLCB3, AP2A2, COX5A, NDUFV1, NDUFB3, NDUFB8, ATP5PO, COX8A, NDUFA9, POLR2E, NDUFS7, ATP5F1B, AP2B1, CASP9, CREB3L2, DCTN4, CLTC, SOD1, ATP5PB, UQCRB, NDUFC2…
GOBP	GOBP_REGULATION_OF_NITRIC_OXIDE_METABOLIC_PROCESS	4.81793e-06	0.00012166	0.610527	0.633008	2.20397	39	CLU, CX3CR1, SOD2, AIF1, CLEC7A, TSPO, IL10, TLR4, CD36, PTX3, TLR6, KLF4, IL1B, TMEM106A, TICAM1, TNF, INSR, PTGS2, AKT1, EDN1, DDAH2, P2RX4
GOBP	GOBP_REGULATION_OF_REACTIVE_OXYGEN_SPECIES_METABOLIC_PROCESS	4.83542e-06	0.000121851	0.610527	0.478296	1.98767	102	ALOX5, SOD2, THBS1, FPR2, HK2, ITGAM, CLEC7A, PRCP, TSPO, G6PD, ACOD1, TYROBP, TLR4, CD36, TLR6, AKR1C1, CBR1, HIF1A, PID1, GSTP1, CYBA, CYP1B1, CDKN1A, PRKCD, RAB27A, SYK, SLC18A2, NFE2L2, TNF, ARG2, ITGB2, CD177, SIRT2
GOBP	GOBP_REGULATION_OF_HORMONE_LEVELS	4.91947e-06	0.000123714	0.610527	0.372465	1.74217	260	ADM, ALOX5, TRPM4, NIBAN2, GLUL, OSM, CTSB, PAPSS2, ALDH1A1, RETN, ICA1, DHRS7, PCSK6, HFE, CTSL, CYP3A5, DAB2, FKBP1B, LIF, GPR27, TSPO, LYN, KCNQ1, DGAT2, IL1RN, TCIRG1, BRSK2, DHRS9, AKR1C1, SLCO4A1, HIF1A, BMP6, TCF7L2, BACE2, RAB11FIP5, STX1A, SLC7A8, IL1B, SLC8B1, P2RY1, CYP1B1, PIM3, FFAR4, ERO1A, FURIN, SRD5A3, DPP4, CPQ, PLA2G7, TRPM2, KLF7, RAB11FIP1, DGAT1, CTSZ, SCPEP1, CHD7, IL6, SPP…
GOBP	GOBP_BIOLOGICAL_PROCESS_INVOLVED_IN_SYMBIOTIC_INTERACTION	4.96088e-06	0.0001245	0.610527	0.397293	1.80684	198	CX3CR1, ITGB5, STOM, NECTIN2, NRP1, CTSB, SCARB2, CARD9, LDLR, FCN1, CTSL, ITGAV, ANPEP, AZU1, FN1, CCL3, SRC, CCL8, PLSCR1, ITGA2, TPCN2, PF4, PTX3, CSF1R, CLEC4G, TRIM5, ATG7, CXCL6, MRC1, GAPDH, CFL1, MYD88, GAS6, CHMP2A, ICAM1, GSN, BCL2L1, CAMP, LAMP1, GPX1, FBXL2, TREM1, INSR, SELPLG, PPIA, CD86, CCR5, CXCL8, SLC1A5, SMARCA4, SIGLEC1, APOE, NCAM1, SAP30, P4HB, CHMP4B, IGF2R, EPS15, SNX3, FU…
GOBP	GOBP_NUCLEAR_CHROMOSOME_SEGREGATION	5.16132e-06	0.000129265	0.610527	-0.324825	-1.71699	223	RIOK2, CHAMP1, SMARCA5, CDC23, STAG1, HNRNPU, PIBF1, MIS12, TERB1, WAPL, STAG2, EHMT2, MRE11, RAD21, BUB3, NUMA1, ZW10, TOP2B, EME1, FANCM, DSN1, EML3, ERCC4, AXIN2, LATS1, SPICE1, CUL3, CDC26, PTTG1, PCID2, PDS5B, TERF1, PDS5A, MAU2, KPNB1, SFPQ, ZNF207, MAD2L1BP, AKAP8L, VPS4B, KIF22, BOD1, ATM, ANKRD31, SLX4, APC, AKAP8, CENPC, RAD51C, SLF2, SUN1, CTCF, KMT5A, CDK5RAP2, ANAPC1, MAD2L1, ANAPC4,…
GOBP	GOBP_MAST_CELL_ACTIVATION	5.22348e-06	0.000130555	0.610527	0.582711	2.12463	48	S100A12, ADGRE2, FGR, HMOX1, FCGR2B, NECTIN2, CD300A, GATA2, FES, CD300LF, LYN, PLSCR1, ADORA2B, GAB2, PTGDS, SYK, RABGEF1, STXBP2, PTPN6, LAT2, BTK, NDRG1
GOBP	GOBP_ALCOHOL_METABOLIC_PROCESS	5.4346e-06	0.000135555	0.610527	0.3872	1.79317	225	ABCG4, PTAFR, ALDH3B1, SPTSSA, SPHK1, CYP39A1, ALDH1A1, LDLR, DHRS7, PCBD1, CYP3A5, DAB2, IDH1, SPTLC2, ASAH1, SOAT1, G6PD, DGAT2, NPC2, GALK1, GK5, CEBPA, PLCB1, DHRS9, AKR1C1, ACSS2, SC5D, RXRA, BMP6, TTC39B, LPCAT3, PLEK, SCARF1, APP, TKTL1, PMVK, P2RY1, ACER2, CYP1B1, ACP3, SRD5A3, SORD, TPI1, DGAT1, FMO5, PTS, OSBPL1A, GBA, RDH12, IMPA2, ACADVL, INSIG1, P2RY6, FDX1, TPK1, ALDH3A2, H6PD, APOB…
GOBP	GOBP_POSITIVE_REGULATION_OF_LIPID_LOCALIZATION	5.54565e-06	0.000137764	0.610527	0.538569	2.08989	67	ABCG4, PTGES, TREM2, MSR1, RETN, LRP1, DAB2, ACSL1, TNFRSF11A, LPL, CD36, NR1H3, IL1A, RXRA, BMP6, LPCAT3, ANXA2, DBI, IL1B, PRELID1, PLIN2, PRKCD, C3, SPP1, ABCA7, TMEM30A, PLA2G4A, APOE, SREBF2, ABCA1, EDN1, P2RX4, PLA2G6, ACSL5, SCP2
GOBP	GOBP_REGULATION_OF_CELL_SHAPE	5.54499e-06	0.000137764	0.610527	0.458583	1.94177	116	MYH14, HCK, CYFIP1, FGR, LST1, BVES, CDC42EP2, FES, BAIAP2, CCL2, RHOU, PLXNB2, COCH, FN1, CCL3, PLXNC1, SEMA4A, VEGFA, CSF1R, CCL7, MYL12B, CDC42EP3, RHOQ, EPB41L3, P2RY1, HEXB, ARHGAP18, RHOB, FGD4, MYH10, PLEKHO1, FGD2, RHOG, ITGB2, PTK2, PLXND1, EPS8, MYO10, WDR1, MSN, RDX, SHROOM3, PEAK3, PLXNA2, RHOA, RHOBTB3, CRK
GOBP	GOBP_NEGATIVE_REGULATION_OF_INFLAMMATORY_RESPONSE_TO_ANTIGENIC_STIMULUS	5.58686e-06	0.000138507	0.610527	0.721886	2.1694	21	HCK, FGR, TREM2, FCGR2B, NOD2, RHBDF2, LYN, IL10, SRC, YES1, FURIN, SYK, GPX1
GOBP	GOBP_INFLAMMATORY_RESPONSE_TO_WOUNDING	5.62277e-06	0.000139115	0.610527	0.796789	2.19383	14	ALOX5, CCR2, HMOX1, TIMP1, GRN, TLR4, IL1A, HIF1A
GOBP	GOBP_DEFENSE_RESPONSE_TO_GRAM_POSITIVE_BACTERIUM	5.71408e-06	0.000140806	0.610527	0.593531	2.12747	44	FGR, NOD2, PYCARD, CARD9, TLR2, RNASE6, C5AR1, LYZ, CD36, ANG, MPEG1, GSDMD, MYD88, CAMP, IL6, TNF, ADAM17, STAB2, FCN2, RIPK2, PPP1R11
GOBP	GOBP_LIPID_CATABOLIC_PROCESS	5.71008e-06	0.000140806	0.610527	0.393425	1.7989	209	PLBD1, SPHK1, SMPDL3A, CYP39A1, DAGLB, LDLR, PLD1, IDH1, LIPA, ASAH1, AOAH, FUCA1, DAGLA, PLA2G15, LPL, MGST2, PLCB1, ACAD10, IVD, LYPLA2, PLCD1, SCARF1, IL1B, ACER2, CYP1B1, PPT1, NAGA, HEXB, SRD5A3, ACOT8, PLA1A, PRKCD, ABHD2, MGLL, PLA2G7, ENPP2, SESN2, ACAA1, SPP1, TNF, HEXA, GBA, SMPD2, ACADVL, PNPLA6, PLBD2, ADTRP, ABHD1, SIRT2, PLCB2, PLA2G4A, ABHD16A, ABHD5, HSD11B1, APOE, DECR1, CPT1B, P…
WP	WP_PPAR_SIGNALING_PATHWAY	5.7665e-06	0.000141812	0.610527	0.628071	2.15913	38	MMP1, ACSL1, LPL, CD36, NR1H3, RXRA, DBI, OLR1, FABP5, ACAA1, ACSL4, ILK, CPT1B, PCK2, FADS2, SLC27A4, ACOX2, ACSL5, SCP2, CYP27A1, CPT1A, SCD, CPT2
GOBP	GOBP_PROTEIN_METHYLATION	5.94903e-06	0.000145742	0.610527	-0.357968	-1.80612	160	METTL18, NFYA, GFI1, KANSL2, KANSL1, SIRT1, BTG1, ZNF274, EHMT2, GSPT1, RIF1, SMYD5, GATA3, KDM4C, NELFA, PCMTD2, SMAD4, EZH1, PAXBP1, KDM3A, PRDM4, SETD4, PHF1, CSKMT, N6AMT1, CHTOP, AUTS2, ZNF304, SUZ12, PAF1, WDR82, BTG2, SETD2, PCMTD1, RLF, RRP8, NSD1, SUV39H2, ARID4A, NSD3, WDR5, NFYB, MTF2, CTCF, KMT5A, ARMT1, SUV39H1, NTMT1, PAX5, PYGO2, SETDB2, FBXO11, DNMT3B, SNRPB, EHMT1, CTR9, CREBBP, …
GOBP	GOBP_REGULATION_OF_CHEMOTAXIS	5.95012e-06	0.000145742	0.610527	0.429674	1.88692	146	CX3CR1, CCR2, TREM2, NRP1, THBS1, NOD2, FPR2, TNFAIP6, SPI1, AIF1, CCL2, LGMN, SERPINE1, AZU1, CCL3, LYN, C5AR1, C3AR1, P2RY12, ITGA2, CCR1, SEMA4A, VEGFA, C5AR2, CSF1R, CCL7, CMKLR1, F3, SLC8B1, SEMA6B, SEMA3C, NOTCH1, GAS6, DPP4, PTPN2, PLA2G7, IL6, ADAM17, MOSPD2, CORO1B, PTK2, CXCL8, MPP1, SUCNR1, STX3, CREB3, ANO6, MAPK3, CALR, OXSR1, EDN1, P2RX4
GOBP	GOBP_POSITIVE_REGULATION_OF_CHEMOTAXIS	6.04777e-06	0.000147838	0.610527	0.472854	1.95372	95	CX3CR1, CCR2, TREM2, NRP1, THBS1, FPR2, SPI1, AIF1, LGMN, SERPINE1, AZU1, CCL3, C5AR1, C3AR1, P2RY12, ITGA2, CCR1, VEGFA, CSF1R, CCL7, CMKLR1, F3, GAS6, PLA2G7, IL6, ADAM17, MOSPD2, PTK2, CXCL8, SUCNR1, STX3, CREB3, ANO6, MAPK3, CALR, OXSR1, EDN1, P2RX4, HSPB1, MET, TNFSF14, NCKAP1L
GOBP	GOBP_PROTEIN_KINASE_B_SIGNALING	6.08183e-06	0.000148375	0.610527	0.437168	1.89147	135	NRG1, CX3CR1, ENG, TNFAIP8L3, THBS1, OSM, MERTK, CCL2, CAVIN3, IL18, TEK, CCL3, SRC, HBEGF, P2RY12, STK3, TCF7L2, F3, IL1B, HIP1, GAS6, THEM4, TGFBR1, ADAM8, RRAS, SESN2, CIB1, HCLS1, GPX1, RTN4, SPRY2, ITGB1BP1, TNF, INSR, MTDH, SESN3, PTK2, ADTRP, GDF15, ILK, SIRT2, MIR29A, PTPRJ, PEAR1, PIK3CB, AKT1, SMPD3, MEIS3, ARRB2, P2RX4, MET, CRYBA1, LOX, ITGB1, PARK7, GCNT2, FGF2
GOBP	GOBP_CELLULAR_RESPONSE_TO_LIPOPROTEIN_PARTICLE_STIMULUS	6.35382e-06	0.000154702	0.610527	0.680403	2.19638	27	ABCG4, CD9, TREM2, CD68, LDLR, LPL, FCER1G, TLR4, CD36, TLR6, MYD88, TICAM1, SYK, ADAM17, ITGB2, ADTRP, APOE, SREBF2, AKT1, SMPD3, ABCA1, CD81, NPC1, ITGB1
GOBP	GOBP_POSITIVE_REGULATION_OF_PEPTIDASE_ACTIVITY	6.43183e-06	0.00015612	0.610527	0.431538	1.88824	143	S100A9, S100A8, MEFV, CTSD, DAPK1, CASP4, PYCARD, CARD9, GRN, P2RX1, CLEC7A, LGMN, CASP1, FN1, LYN, NLRC4, VSIR, F3, APP, NLRP3, HIP1, ACER2, APAF1, NLRP12, PRELID1, GSN, PSENEN, SYK, TTBK1, IFT57, NCSTN, PICALM, TNF, PSME2, AIM2, IFI16, STAT3, ANP32B, MTCH1, CLDN4, AKIRIN2, RIPK2, BAD, CTSH, NLRP1, DAP, CASP5, BID, PSME4, MAP3K5, BCAP31, PDCD5, RHOA, VCP, DDRGK1, HSPD1, EFNA1, CASP9, PPM1F, NLRP…
GOBP	GOBP_REGULATION_OF_CHROMATIN_ORGANIZATION	6.43753e-06	0.00015612	0.610527	-0.58102	-2.23532	36	TLK1, HNRNPU, RESF1, TLK2, SPTY2D1, PIK3CA, TASOR, MORC2, ATF7IP2, ZNF304, ATF7IP, LMNTD2, SETDB2, PHF2, CTR9, TRIM28, PPHLN1, SIN3A, METTL4, MLLT3, ALKBH4, ZNF445, PHF8, TET1
GOBP	GOBP_FC_GAMMA_RECEPTOR_SIGNALING_PATHWAY	6.4606e-06	0.00015637	0.610527	0.679783	2.19438	27	HCK, FGR, FCGR2B, LYN, SRC, FCER1G, YES1, PRKCD, PAK1, SYK, CLEC4E, LIMK1, PTK2, MYO1G, PTPRJ, PLD2, VAV3, PLA2G6
GOBP	GOBP_NUCLEAR_TRANSPORT	6.47723e-06	0.000156463	0.610527	-0.305807	-1.6402	250	RIOK2, SUFU, SMAD3, TXNIP, FAM53C, PHAX, NUP107, KPNA1, NUP160, CTDSPL2, CPSF6, ING1, XPOT, NSUN2, IPO11, DUSP16, TSC1, TNPO1, APPL2, THOC3, NEDD4, POLDIP3, SMG5, GSK3B, CRY2, NF1, FAM53B, ABCE1, FYTTD1, POLR2D, AXIN1, UPF2, FRAT1, RAE1, NUP54, TSC2, NPM1, DHX9, SMG7, HSPA9, PCID2, CHTOP, EIF4ENIF1, NUP35, NXF1, SETD2, KPNB1, SMG6, AKAP8L, XPO5, ALKBH5, NUP42, TP53, PPP1CC, TRAF3IP2, ZC3H11A, KPN…
REACTOME	REACTOME_CHEMOKINE_RECEPTORS_BIND_CHEMOKINES	6.53116e-06	0.000157455	0.610527	0.627772	2.12829	36	PPBP, CX3CR1, CCR2, CXCL1, CCL2, CCL20, CXCL16, CCL3, CXCL3, CCR1, PF4, CCL7, CXCL6, CCRL2, CXCR1, CCR5, CXCL8
GOBP	GOBP_ORGANIC_ACID_BIOSYNTHETIC_PROCESS	6.57159e-06	0.000158118	0.610527	0.399471	1.79883	186	ALOX5, PTGES, GLUL, TBXAS1, DPYD, ALOX5AP, SLC1A3, CYP39A1, ALDH1A1, DAGLB, PCBD1, HACD4, GATM, LPL, MGST2, SERINC5, NR1H3, CTH, DHRS9, LTA4H, CBR1, KYNU, ELOVL7, ALOX12, MTHFR, GSTP1, IL1B, PLOD3, IDO1, MTHFD1L, ACOT8, MGST3, MTHFD2L, PTGDS, ABHD2, MGLL, PTGES2, FABP5, SYK, OSBPL1A, HSD3B7, QKI, GGT5, ACADVL, INSIG1, MLXIPL, PDK4, ABHD1, HSD17B12, PLA2G4A, CSAD, UGDH, HACD2, PTGS2, FASN, EDN1, F…
bioplanet	bioplanet_Innate immune system	6.59649e-06	0.000158406	0.610527	0.402579	1.81082	183	TLR5, S100A12, CCR2, MEFV, LGALS3, NOD2, CTSB, CASP4, PYCARD, CARD9, MAPK11, IRAK3, CTSL, LY96, LGMN, DUSP6, TLR2, CASP1, CD14, CTSS, CD180, TLR8, TLR4, NLRC4, DNM1, C1QB, TLR6, TLR1, C1QC, CFD, RNF135, APP, UNC93B1, NLRP3, MAP2K3, MAPKAPK3, MYD88, TICAM1, C3, BCL2L1, PPP2CB, MAPKAPK2, CNPY3, CFH, PELI3
GOBP	GOBP_DNA_RECOMBINATION	6.69135e-06	0.00016037	0.610527	-0.305494	-1.63852	250	ACTR8, KPNA1, THAP9, IL7R, WDR48, RPA2, TCF7, TERF2, ING3, RIF1, MRE11, RAD21, DCAF1, HELQ, BLM, TOP2B, EME1, NFRKB, CDC7, FANCM, TFRC, BRD8, VPS72, CD28, TBX21, FAN1, ERCC4, BCL11B, SWSAP1, RNF138, EPC1, SHLD3, APLF, AP5Z1, FANCB, RFWD3, CYREN, ARID2, SETX, SETD2, CD40LG, SFPQ, TERF2IP, MAGEF1, KPNA2, ATM, ANKRD31, TSN, SLX4, HDGFL2, NABP1, MMS19, SMCHD1, ACTR5, LEF1, RAD51C, MSH2, YEATS4, PTPRC…
WP	WP_PROSTAGLANDIN_SIGNALING	6.72607e-06	0.000160887	0.610527	0.676305	2.19789	29	PTGES, CCR2, PYCARD, CXCL1, CCL2, CASP1, CCL3, PTGER2, MMP9, VEGFA, IL1A, IL1B, NLRP3, IL6, TNF, CXCL8
REACTOME	REACTOME_CELL_CYCLE	6.78228e-06	0.000161915	0.610527	-0.250039	-1.45185	554	SMARCA5, CEP76, TUBA4A, ODF2, LBR, CDC23, SKP2, STAG1, CHTF18, PPP2R5A, NUP107, TUBB2B, MIS12, NUP160, SYNE1, AHCTF1, RBL2, ORC4, LPIN1, CEP135, WAPL, RPA2, NUP43, STAG2, HJURP, TERF2, TUBGCP3, YWHAZ, SUN2, TNPO1, DYNLL2, NEK9, MRE11, CCP110, RAD21, TUBGCP5, BUB3, NUMA1, CEP57, POT1, ZW10, CDKN1B, SHQ1, BLM, NEDD1, RFC5, CEP70, CENPJ, CDC7, GSK3B, PCM1, ANKLE2, UIMC1, LEMD3, GINS3, DSN1, POLR2D, …
GOBP	GOBP_REGULATION_OF_CELL_MORPHOGENESIS	6.93636e-06	0.000165272	0.610527	0.381915	1.76856	226	MYH14, HCK, CYFIP1, FGR, NRP1, LST1, BVES, CDC42EP2, FES, BAIAP2, CCL2, DAB2, RHOU, PLXNB2, DOCK5, COCH, FN1, CCL3, SRC, SS18L1, SPAG9, PLXNC1, SEMA4A, VEGFA, CSF1R, CCL7, MYL12B, CDC42EP3, CAPZB, SPARC, RHOQ, EPB41L3, EPHB2, P2RY1, CORO1C, CFL1, HEXB, ARHGAP18, RHOB, FGD4, MYH10, PLEKHO1, ENPP2, CIB1, FGD2, CUX1, ITGB1BP1, RHOG, PARP6, DVL3, DBNL, ITGB2, CORO1B, PTK2, PLXND1, EPS8, RNF157, ILK, …
GOBP	GOBP_RESPONSE_TO_EXTRACELLULAR_STIMULUS	6.97555e-06	0.000165883	0.610527	0.355803	1.68898	309	ADM, UPP1, AQP3, GLUL, SOD2, RASGRP4, HMOX1, WIPI1, VDR, NOD2, CD68, SLC39A4, LDLR, AIF1, FES, HFE, FOSL1, RRAGC, FKBP1B, TSPO, CYBB, LYN, ACSL1, G6PD, SRC, GAS2L1, LPL, BRSK2, NUDT1, ITGA2, ARSB, IL1A, ADORA2B, RXRA, KYNU, ATG7, GSDMD, MTHFR, SLC8A1, LAMP2, CYBA, SH3GLB1, LRP11, CYP1B1, WDR45, RIPOR1, MAP1LC3A, APAF1, CDKN1A, GAS6, ADRB2, SORD, ACTA1, PLEC, SLC1A2, SESN2, FOLR2, GABARAP, GPX1, M…
GOBP	GOBP_HOMOTYPIC_CELL_CELL_ADHESION	7.05796e-06	0.000167517	0.610527	0.517598	2.01304	70	CD9, EMILIN2, PLAUR, VCL, FN1, LYN, CLIC1, P2RY12, ZNF703, COMP, ALOX12, PLEK, CEACAM5, GP1BA, MYL9, FERMT3, PRKCD, TLN1, SYK, IL6, ACTG1, SERPINE2, PPIA, ILK, PTPN6, PEAR1, CSRP1, PIK3CB, SLC7A11, RDX, RAP2B, ACTB, GP6, HSPB1
GOBP	GOBP_NEGATIVE_REGULATION_OF_CELL_CYCLE	7.26542e-06	0.000172108	0.610527	-0.296332	-1.61552	293	TNFAIP3, SMARCA5, TSPYL2, PDCD4, XPC, WAC, SYF2, HECA, BTN2A2, USP47, NPR2, ZFP36L2, YTHDC2, SIRT1, JADE1, RGCC, BTG1, MDM1, RBL2, PLK2, WAPL, RPA2, TERF2, NSUN2, APBB1, HEXIM1, MRE11, CCP110, RAD21, GATA3, BUB3, ZW10, CDKN1B, APBB2, BLM, EME1, ETAA1, UIMC1, CDC5L, CDC73, LATS1, RBM14, CTDSP2, NPM1, FBXO7, THAP5, CCAR2, TFAP4, PTTG1, PCID2, SDE2, TERF1, HINFP, ZNF830, RFWD3, CASP3, BTG2, ZNF207, …
KEGG	KEGG_PPAR_SIGNALING_PATHWAY	7.30361e-06	0.000172345	0.610527	0.634232	2.15948	37	MMP1, ACSL1, LPL, CD36, NR1H3, RXRA, DBI, OLR1, FABP5, ACAA1, ACSL4, ILK, CPT1B, PCK2, FADS2, SLC27A4, ACOX2, ACSL5, SCP2, CYP27A1, CPT1A, SCD, CPT2
bioplanet	bioplanet_PPAR signaling pathway	7.30361e-06	0.000172345	0.610527	0.634232	2.15948	37	MMP1, ACSL1, LPL, CD36, NR1H3, RXRA, DBI, OLR1, FABP5, ACAA1, ACSL4, ILK, CPT1B, PCK2, FADS2, SLC27A4, ACOX2, ACSL5, SCP2, CYP27A1, CPT1A, SCD, CPT2
bioplanet	bioplanet_L1CAM interactions	7.43485e-06	0.000175105	0.610527	0.509164	1.99416	71	NRP1, ALCAM, AP2A1, ITGAV, LAMC1, SRC, SDCBP, ITGA2B, DNM1, ITGA2, ITGA9, EPHB2, PAK1, SCN1B, NRP2, CSNK2A2, RPS6KA4, NUMB, NCAM1, MAPK3, AP2M1, AP2S1, MSN, ANK1, AP2A2, RDX, SCN3B, L1CAM, RPS6KA2, DPYSL2, ITGB1, SCN4A, AP2B1, ITGA5, SPTBN2, CLTC, MAP2K1
GOBP	GOBP_CELLULAR_MODIFIED_AMINO_ACID_METABOLIC_PROCESS	7.50388e-06	0.000176392	0.610527	0.447991	1.92342	126	SOD2, VNN1, SLC46A1, CTSB, SLC22A4, MTHFD2, IDH1, GATM, ETHE1, G6PD, PLA2G15, CLIC1, PLSCR1, MGST2, SERINC5, VNN2, LPCAT3, PCYOX1, MTHFR, GSTP1, PLOD3, GSTO1, MTHFD1L, MTHFD2L, PLA1A, CPQ, SLC1A2, PTGES2, TMLHE, GPX1, NFE2L2, GGT5, POR, ABHD16A, PIPOX, CPT1B, MTHFS, GSR, MFSD2A, TG, MBOAT1, SLC7A11, CKB, ABHD16B, GLRX2, GCLM, MTHFD1, PARK7, CPT1A, GSTK1, DPEP1, SOD1, CPT2, FPGS
GOBP	GOBP_EPITHELIAL_CELL_DIFFERENTIATION	7.58812e-06	0.00017803	0.610527	0.340801	1.63491	365	JAG2, NRG1, MYO7A, AQP3, CSTA, LGALS3, ADAMTSL4, NRP1, VDR, CTSB, PSAP, UGCG, TNFRSF1A, CLDN5, VCL, HES1, DAB2, NOTCH2, ASAH1, SERPINE1, LIF, JAG1, MAFG, SPRED1, KCNQ1, SRC, MMP9, SPRY1, ITGA2, RAB13, ZNF703, MTSS1, VEGFA, TGFB1I1, PLCB1, DHRS9, IL1A, LTA4H, AKR1C1, CBR1, KLF4, CDK6, HIF1A, BMP6, CEBPB, CASP6, IQGAP1, CDKN1C, CDH23, IL1B, PLOD3, RAB10, NOTCH1, TPP1, MYD88, B9D1, YIPF6, VIM, ICAM1…
GOBP	GOBP_SUPRAMOLECULAR_FIBER_ORGANIZATION	7.63427e-06	0.00017877	0.593325	0.322522	1.58581	505	CLU, MYO7A, HCK, CYFIP1, ITGB5, TREM2, MSRB1, NRP1, TNFAIP6, PYCARD, PSTPIP2, LDLR, CDC42EP2, AIF1, ZYX, FES, BAIAP2, SCIN, TMSB10, HDGFL3, MYO1F, MARCKS, SSH3, SRC, GAS2L1, CYRIA, PRKCI, CAPG, CD36, PXN, ANG, MTSS1, COMP, TPM4, DES, CDC42EP3, ARHGAP6, MDM2, CAPZB, CTNNA1, ARRB1, GFAP, WASHC3, LOXL3, PLEK, CTTN, APP, CST3, ZBED3, GAS7, CORO1C, CAPN3, PLOD3, HIP1, CYP1B1, BRK1, ARPC3, FHOD1, CFL1,…
GOBP	GOBP_NEGATIVE_REGULATION_OF_COAGULATION	7.67049e-06	0.000179276	0.593325	0.662811	2.13279	28	CD9, TFPI, PLAU, THBS1, SERPINE1, THBD, ANXA5, ALOX12, GP1BA, PRKCD, PROS1, SERPINE2, ADTRP, SERPING1, APOE, SERPINB2, EDN1, ADAMTS18, NOS3
GOBP	GOBP_NEGATIVE_REGULATION_OF_HYDROLASE_ACTIVITY	7.75927e-06	0.000181005	0.593325	0.39398	1.79454	202	TFPI, CSTA, SERPINA1, LGALS3, PLAUR, THBS1, SERPINB1, CTSB, SPINT1, TIMP1, PZP, LRP1, NOL3, NAIP, FKBP1B, SERPINE1, HGF, SRC, RENBP, MMP9, SPRY1, ECM1, PTX3, VEGFA, APLP2, SORT1, KLF4, SERPINB10, ANXA2, APP, CST3, STYXL1, GAPDH, PRDX5, FURIN, GAS6, PRDX3, C3, SERPINB8, CSTB, TMBIM6, CD109, GPX1, SPRY2, PICALM, TFPI2, TNF, RGS2, PROS1, GMIP, FKBP1A, SERPINE2, IFI16, SERPING1, CDKN2D, POR, TMEM225B…
GOBP	GOBP_MRNA_METHYLATION	7.86818e-06	0.000183197	0.593325	-0.760682	-2.27985	16	TRMT61A, VIRMA, NSUN2, METTL14, CBLL1, METTL8, CMTR2, TRMT10C, PCIF1, CMTR1, METTL16, TRMT61B, WTAP
GOBP	GOBP_REGULATION_OF_ANTIGEN_PROCESSING_AND_PRESENTATION	7.90329e-06	0.000183665	0.593325	0.792632	2.20619	15	TREM2, FCGR2B, SLC11A1, THBS1, NOD2, PYCARD, CD68, FGL2, HFE
GOBP	GOBP_DIGESTION	7.92681e-06	0.000183863	0.593325	0.546454	2.06327	55	SNX10, VDR, SLC46A1, NOD2, UGCG, CYP39A1, LDLR, TIFAB, KCNQ1, TLR4, CD36, NR1H3, SLC2A5, AKR1C1, SGK1, LPCAT3, CHIT1, HRH2
GOBP	GOBP_LEUKOTRIENE_METABOLIC_PROCESS	8.48871e-06	0.000196524	0.593325	0.790891	2.20134	15	ALOX5, ALOX5AP, TLR2, MGST2, LTA4H, ALOX12, MGST3, ABCC1, SYK, MAPKAPK2, GGT5, PLA2G4A
GOBP	GOBP_RESPONSE_TO_INTERFERON_GAMMA	8.638e-06	0.000199603	0.593325	0.480371	1.99065	96	CCL23, HCK, RAB20, MEFV, SLC11A1, DAPK1, CDC42EP2, AIF1, ZYX, CCL2, CCL20, CXCL16, TLR2, CASP1, CCL3, ACOD1, CCL8, TLR4, NR1H3, CCL7, KYNU, MRC1, GAPDH, PTPN2, VIM, GSN, ACTG1, TNF, CITED1
HALLMARK	HALLMARK_E2F_TARGETS	8.69002e-06	0.000200427	0.593325	-0.3465	-1.80652	184	LBR, PPM1D, STAG1, NUP107, RPA2, PRPS1, GSPT1, ING3, MRE11, CCP110, RAD21, SRSF2, ZW10, CDKN1B, XRCC6, TFRC, HNRNPD, GINS3, PCNA, NUDT21, PLK4, ASF1A, PTTG1, USP1, PSIP1, PDS5B, KIF22, TP53, KPNA2, DCTPP1, DCLRE1B, TMPO, XPO1, UBE2S, ORC6, EXOSC8, RAD51C, MSH2, POLD1, CTCF, SUV39H1, PRIM2, UNG, SNRPB, PHF5A, TRA2B, PMS2, RBBP7, MAD2L1, ATAD2, MCM7, RNASEH2A, STMN1
bioplanet	bioplanet_Bacterial invasion of epithelial cells	8.82417e-06	0.000203138	0.593325	0.545253	2.05873	55	VCL, FN1, SRC, DNM1, PXN, CTNNA1, CTTN, ARPC3, HCLS1, ACTG1, RHOG, CLTB, ARHGAP10, PTK2, MAD2L2, ILK, PIK3CB, ACTB, ARPC2, MET, CBLC, GAB1, RHOA, CRK, ITGB1, ITGA5, SHC1, CLTC, CBL, WAS
GOBP	GOBP_ORGANIC_ANION_TRANSPORT	8.95912e-06	0.000205858	0.593325	0.390828	1.78317	206	EMB, PTGES, AQP9, SLC47A1, ABCC4, MGST1, SLC46A1, SLC1A3, SLC7A7, PSAP, RHAG, TNFRSF11A, SERINC5, ABCC3, CD36, SLC43A2, SLCO2B1, SLC16A3, SLC2A6, IL1A, AKR1C1, SLC6A6, SLCO4A1, SLC6A9, SLC36A4, GFAP, SLC7A8, IL1B, SLC25A24, BEST1, ABCC1, SLC17A9, APBA1, SLC1A2, CYB5R1, SLC26A8, SYK, FOLR2, SLC2A14, SLC35A2, SLC38A7, TNF, RGS2, PSEN1, SLC1A5, ABCC6, PLA2G4A, SLCO3A1, SLC2A8, SLC26A10, GLTP, MFSD2A…
GOBP	GOBP_DETECTION_OF_BIOTIC_STIMULUS	9.00361e-06	0.000206493	0.593325	0.71577	2.1717	22	TREM2, NOD2, LY96, CLEC7A, NAIP, TLR2, TSPO, TLR4, NLRC4, TLR6, TLR1, NLRP3, PAK1
GOBP	GOBP_RESPONSE_TO_PEPTIDOGLYCAN	9.14959e-06	0.000209353	0.593325	0.831783	2.18352	12	TREM2, NOD2, CARD9, IRAK3, C5AR1, IRF5, MYD88, CAMP, IL6, RIPK2
REACTOME	REACTOME_INTERLEUKIN_1_FAMILY_SIGNALING	9.1625e-06	0.000209353	0.593325	0.448154	1.90311	118	ALOX5, S100A12, TNIP2, PTPN18, NOD2, IL1RAP, IRAK3, CASP1, IL18, IL1R1, IL1RN, IL1A, MAP3K8, GSDMD, APP, IL1B, MYD88, PSMD13, PTPN12, PTPN2, PSMB3, IL1R2, PELI3, RBX1, PSMB5, PSMB6, PSME2, PSMD1, PTPN6, STAT3, TOLLIP, IL18RAP, PSMB9, SEM1, RIPK2, PSMD2, PTPN9, PSMC1, PELI2, PSMB7, PSME4, IRAK1, IL1RL1, PSMB2, PTPN14, PSMD14, PSMB10, MAP2K1, IKBKG, PSMB4, PSMA5, MAP2K4, TBK1, PSMB8, PSMA4, PSMD4, …
KEGG	KEGG_LEISHMANIA_INFECTION	9.38886e-06	0.000213727	0.593325	0.565751	2.06977	49	FCGR1A, NCF2, ITGAM, IFNGR2, MAPK11, TLR2, NCF4, IL10, TLR4, IL1A, NCF1, IFNGR1, IL1B, CYBA, MYD88, C3, TNF, ITGB2, PTPN6, PTGS2, MAPK3
bioplanet	bioplanet_Leishmaniasis	9.38886e-06	0.000213727	0.593325	0.565751	2.06977	49	FCGR1A, NCF2, ITGAM, IFNGR2, MAPK11, TLR2, NCF4, IL10, TLR4, IL1A, NCF1, IFNGR1, IL1B, CYBA, MYD88, C3, TNF, ITGB2, PTPN6, PTGS2, MAPK3
GOBP	GOBP_POSITIVE_REGULATION_OF_NITRIC_OXIDE_METABOLIC_PROCESS	9.52407e-06	0.000216403	0.593325	0.669742	2.17656	29	CLU, SOD2, AIF1, CLEC7A, TLR4, CD36, PTX3, TLR6, KLF4, IL1B, TMEM106A, TICAM1, TNF, INSR, PTGS2, AKT1, EDN1, DDAH2, P2RX4
GOBP	GOBP_REGULATION_OF_MACROPHAGE_ACTIVATION	9.57877e-06	0.000217243	0.593325	0.596327	2.12378	43	TNIP2, TREM2, FCGR2B, SPHK1, THBS1, LDLR, GRN, CTSC, VSIG4, CCL3, IL10, TLR4, NR1H3, CEBPA, TLR6, TTBK1, IL6, SYT11, PLA2G4A
GOBP	GOBP_CYTOKINE_PRODUCTION_INVOLVED_IN_INFLAMMATORY_RESPONSE	9.80297e-06	0.000221917	0.593325	0.586779	2.10327	44	ALOX5, TREM2, MEFV, NOD2, PYCARD, CARD9, LILRB4, CLEC7A, TLR4, TLR6, HIF1A, EPHB2, MYD88, TICAM1, IL1R2, IL6, TNF
GOBP	GOBP_POSITIVE_REGULATION_OF_REGULATED_SECRETORY_PATHWAY	9.96912e-06	0.000225262	0.593325	0.650092	2.13339	30	PTAFR, RAB3D, FGR, ITGAM, GATA2, ADORA2B, GAB2, STX1A, RAB27A, SYK, LAMP1, CDK5, ITGB2, CD177, SCAMP5, HYAL3
GOBP	GOBP_CELL_MATRIX_ADHESION	1.00592e-05	0.000226878	0.593325	0.424017	1.87435	153	ITGB5, PLAU, NRP1, THBS1, ITGAM, VCL, ZYX, ITGAV, SERPINE1, JAG1, TEK, FN1, SRC, ITGA2B, CD36, PXN, ITGA2, VEGFA, CDK6, ARHGAP6, ITGA9, CTTN, CORO1C, ACER2, BCL6, ADAM15, FERMT3, ADAM9, RIN2, RRAS, CIB1, ACTG1, ITGB1BP1, ITGAX, DDR1, DISC1, CDK5, PARVG, ITGB2, PTK2, ILK, SIGLEC1, PTPRJ, PIK3CB, CD44, LIMCH1, PTPRK, CLASP2, S100A10, SLC9A1, L1CAM, TNN, RHOA, ITGB1, POLDIP2, ITGA5, UTRN, PPM1F, EFE…
GOBP	GOBP_STEROL_TRANSPORT	1.00913e-05	0.000227184	0.593325	0.511285	2.00011	73	CLU, ABCG4, TREM2, MSR1, LDLR, LRP1, TSPO, SOAT1, NPC2, CD36, TPCN2, NR1H3, AKR1C1, RXRA, TTC39B, LPCAT3, ANXA2, FURIN, STARD5, YJEFN3, OSBPL1A, LAMTOR1, ABCA7, APOE, SREBF2, ABCA1, NUS1, SCP2, NPC1
GOBP	GOBP_MEMBRANE_INVAGINATION	1.01496e-05	0.000228078	0.593325	0.544382	2.07622	60	MARCO, FCGR1A, TREM2, FCGR2B, RAB31, MSR1, THBS1, ITGAM, CD300A, AIF1, GATA2, CLEC7A, CD36, ITGA2, CHMP2A, C3, GSN, SNX33, RHOG, SNX18, ABCA7, ITGB2, ANO6, FCHO2, ABCA1, SNX3, RHOA, NCKAP1L
GOBP	GOBP_CENTROSOME_DUPLICATION	1.02959e-05	0.000230942	0.593325	-0.492147	-2.13974	61	CEP76, SIRT1, MDM1, PLK2, CEP135, CEP44, CCP110, ROCK2, CENPJ, CEP120, USP33, RBM14, SPICE1, NPM1, PLK4, CKAP5, VPS4B, PPP1R35, XPO1, NAT10, RTTN, CEP72, CDK5RAP2, BRSK1, CEP152, CHORDC1, OFD1
GOBP	GOBP_REGULATION_OF_MAST_CELL_ACTIVATION_INVOLVED_IN_IMMUNE_RESPONSE	1.03304e-05	0.000231292	0.593325	0.699893	2.19492	24	ADGRE2, FGR, HMOX1, CD300A, GATA2, FES, LYN, ADORA2B, GAB2, SYK, RABGEF1, STXBP2, PTPN6
GOBP	GOBP_CELLULAR_RESPONSE_TO_INTERLEUKIN_1	1.0357e-05	0.000231464	0.593325	0.529534	2.05483	67	CCL23, TNIP2, PYCARD, MAPK11, HES1, CCL2, IRAK3, CCL20, IL1R1, CCL3, ACOD1, IL1RN, CCL8, PLCB1, CCL7, HIF1A, CEBPB, IL1B, MYD88, CAMP, MMP2, IL1R2, IL6, CXCL8, RPS6KA4, TOLLIP, MAPK3, HYAL3, EDN1
GOBP	GOBP_OLEFINIC_COMPOUND_METABOLIC_PROCESS	1.04459e-05	0.000233025	0.593325	0.503921	1.9911	77	ADM, ALOX5, TBXAS1, ALDH1A1, DAGLB, DHRS7, CYP3A5, DAB2, DAGLA, DGAT2, DHRS9, AKR1C1, CBR1, BMP6, ALOX12, GSTP1, CYP1B1, ACOT8, PTGDS, MGLL, PTGES2, DGAT1, ACAA1, GPX1, RDH12, H6PD, PLA2G4A, CYP2J2, RDH5, PTGS2, EPHX2, FADS2, FADS1, CLCN2, SCP2
GOBP	GOBP_AMINO_ACID_IMPORT_ACROSS_PLASMA_MEMBRANE	1.05253e-05	0.000234244	0.593325	0.678765	2.17383	26	SLC47A1, SLC1A3, SLC22A4, SLC43A2, SLC6A6, SLC6A9, SLC36A4, GFAP, SLC7A8, SLC1A2, TNF, RGS2, PSEN1, SLC1A5, SLC7A11, SLC36A1, CLN8, SLC7A5, ITGB1
GOBP	GOBP_CELLULAR_RESPONSE_TO_EXTERNAL_STIMULUS	1.05388e-05	0.000234244	0.593325	0.376044	1.74884	230	TLR5, UPP1, ENG, AQP3, GLUL, TNFRSF8, HMOX1, WIPI1, VDR, CD68, TNFRSF1A, SLC39A4, AIF1, FES, FOSL1, CASP1, RRAGC, TMEM150C, LTBR, LYN, GAS2L1, LPL, BRSK2, TLR8, TLR4, NUDT1, ITGA2, ADORA2B, RXRA, BMP6, ATG7, GSDMD, LAMP2, IL1B, CYBA, SH3GLB1, CDA, WDR45, RIPOR1, MAP1LC3A, CDKN1A, MYD88, GAS6, TNFRSF10A, PLEC, SLC1A2, SESN2, FOLR2, KCNJ2, GABARAP, MN1, NFE2L2, ATF3, KLF10, GBA, CPEB4, TFEB, SESN3,…
GOBP	GOBP_FATTY_ACID_METABOLIC_PROCESS	1.08448e-05	0.000239838	0.593325	0.372889	1.73755	243	ALOX5, PTGES, TBXAS1, ALOX5AP, TNFRSF1A, DAGLB, HACD4, PRKAR2B, ASAH1, AOAH, ACSL1, DAGLA, PLA2G15, DGAT2, LPL, CD36, NR1H3, TREX1, AKR1C1, CBR1, ELOVL7, ACAD10, IVD, ALOX12, LYPLA2, DBI, GSTP1, IL1B, CYP1B1, ACOT8, THEM4, PTGDS, C3, PAM, ABHD2, MGLL, SESN2, PTGES2, FABP5, ACAA1, GPX1, ACBD4, QKI, GGT5, ACADVL, INSIG1, ACSL4, MLXIPL, PDK4, ADTRP, NCOR1, ALDH3A2, ABHD1, HSD17B12, PLA2G4A, POR, ABH…
GOBP	GOBP_ORGANOPHOSPHATE_METABOLIC_PROCESS	1.08156e-05	0.000239838	0.593325	0.30103	1.50189	676	UPP1, PTAFR, PYGL, TNFAIP8L3, PLBD1, TREM2, HK3, DPYD, GUCY1B1, HK2, PAPSS2, SMPDL3A, LDLR, IMPDH1, PLD1, PGAP1, ENTPD1, ENO1, GUCY1A1, IDH1, SPTLC2, PCYT1A, MOCOS, NAPRT, ACSL1, G6PD, ATP6V1A, PLA2G15, DGAT2, LPL, PLSCR1, SERINC5, PGD, GALK1, GK5, SOCS2, LPCAT2, SLC2A6, NR1H3, PLCB1, TREX1, CSF1R, PFKFB3, ADORA2B, ACSS2, KYNU, ELOVL7, HIF1A, AK4, LDHA, PFKFB4, BMX, PLCD1, TKT, LPCAT3, PLEK, DBI,…
REACTOME	REACTOME_COMPLEMENT_CASCADE	1.08492e-05	0.000239838	0.593325	0.678343	2.17248	26	CLU, FCN1, C5AR1, C3AR1, CFP, C1QB, C5AR2, C1QC, CFD, C3, CFH, PROS1, SERPING1, FCN2
REACTOME	REACTOME_TRANSFERRIN_ENDOCYTOSIS_AND_RECYCLING	1.09935e-05	0.000242589	0.593325	0.734536	2.19602	20	STEAP3, ATP6V0D2, HFE, ATP6V1A, TCIRG1, ATP6V0D1, ATP6V0A1, ATP6V1D, ATP6AP1, ATP6V1B2, MCOLN1, ATP6V0E1
GOBP	GOBP_REGULATION_OF_MYELOID_LEUKOCYTE_DIFFERENTIATION	1.10832e-05	0.000244129	0.593325	0.497223	1.98231	80	TREM2, TNFAIP6, LILRB4, GATA2, FES, NOTCH2, LIF, TRIB1, CCL3, LYN, MAFB, TYROBP, TLR4, CCR1, PF4, C1QC, CDK6, CEBPB, ESRRA, PTPN2, HCLS1, TNF, MITF, PPARGC1B, KLF10, TCTA
GOBP	GOBP_NEGATIVE_REGULATION_OF_CELL_ADHESION	1.11912e-05	0.000246067	0.593325	0.391463	1.77919	199	CD9, ADAMDEC1, LGALS3, FCGR2B, THBS1, HLX, LILRB4, CD300A, SPI1, FGL2, HFE, VSIG4, PLXNB2, SERPINE1, JAG1, IL10, GPNMB, SRC, IL1RN, PDCD1LG2, PLXNC1, TNFRSF21, VSIR, ZNF703, VEGFA, TGFBI, KLF4, CLEC4G, BMP6, ARHGAP6, ALOX12, CEBPB, LOXL3, EPHB2, CORO1C, ACER2, BCL6, CYP1B1, IDO1, ADAM15, NOTCH1, PTPN2, PRKCD, LPXN, MMP2, ITGB1BP1, ARG2, CD274, PTK2, SERPINE2, MAD2L2, SPN, PLXND1, ADTRP, CD86, PTP…
GOBP	GOBP_REGULATION_OF_CELLULAR_LOCALIZATION	1.12231e-05	0.000246325	0.593325	0.306608	1.5218	605	TRPM4, GLUL, ADGRE2, FGR, UBXN2B, TREM2, HMOX1, STOM, LGALS3, BVES, TNFAIP6, ITGAM, LILRB4, CD300A, SPI1, PGAP1, GATA2, FES, HFE, LRP1, P2RX1, DAB2, RHOU, FKBP1B, LIF, GPR27, LYN, SRC, SDCBP, PTPN1, TYROBP, PRKCI, BRSK2, CD36, ABI3, STAC3, ADORA2B, SLC6A9, GAB2, IQSEC2, HIF1A, LATS2, TCF7L2, OAZ1, YWHAE, PRKACA, CTNNA1, ATP2C1, ANXA2, RHOQ, TAX1BP3, RAB11FIP5, SLC8A1, EPHB2, PID1, IL1B, CYBA, SH3…
GOBP	GOBP_ADAPTIVE_IMMUNE_RESPONSE	1.14432e-05	0.000250706	0.593325	0.346436	1.65238	331	CLU, BATF, CX3CR1, TRPM4, FCGR1A, CCR2, TREM2, FCGR2B, NECTIN2, SLC11A1, NOD2, ADGRE1, HLX, ALCAM, PYCARD, CARD9, LILRB4, LILRA6, HFE, CTSC, CTSL, BCL3, LILRA1, CLEC7A, IL18, JAG1, CTSS, IL1R1, LYN, IL10, TNFRSF11A, PDCD1LG2, FCER1G, TCIRG1, TNFRSF1B, CSF2RB, TNFSF13B, TLR8, TLR4, TNFRSF21, C1QB, SEMA4A, RAP1GAP2, TREX1, C1QC, CLEC4G, CLEC4A, BMX, LOXL3, UNC93B1, EPHB2, IL1B, NLRP3, BCL6, FUT7, N…
GOBP	GOBP_ACUTE_PHASE_RESPONSE	1.15709e-05	0.000253051	0.593325	0.712399	2.14089	21	PTGES, SERPINA1, CD163, FN1, TNFRSF11A, PLSCR1, IL1A, CEBPB, IL1B, IL6, IL22, TNF, PTGS2, APOL2
GOBP	GOBP_NEGATIVE_REGULATION_OF_DEFENSE_RESPONSE	1.17495e-05	0.000256499	0.593325	0.406139	1.81091	162	ALOX5, HCK, FGR, TREM2, MEFV, FCGR2B, NOD2, HTRA1, FPR2, TNFAIP6, TNFRSF1A, LDLR, GRN, FGL2, IRAK3, METRNL, VSIG4, RHBDF2, TEK, HGF, AOAH, LYN, IL10, SRC, ACOD1, TNFRSF1B, NR1H3, TREX1, KLF4, YES1, LPCAT3, GSTP1, NLRP3, FFAR4, NLRP12, FURIN, PTPN2, PRKCD, SYK, VPS35, GPX1, ARG2, GBA, RABGEF1, SAMHD1, IFI16, SERPING1, SYT11, SIRT2
GOBP	GOBP_MACROPHAGE_MIGRATION	1.20984e-05	0.000263178	0.593325	0.619195	2.15587	39	CX3CR1, CD9, CCR2, TREM2, LGALS3, THBS1, CCL2, AZU1, CCL3, C5AR1, C3AR1, P2RY12, CSF1R, CMKLR1
GOBP	GOBP_REGULATION_OF_PEPTIDYL_TYROSINE_PHOSPHORYLATION	1.20976e-05	0.000263178	0.593325	0.405595	1.81377	169	NRG1, FCGR1A, TREM2, LILRA5, NRP1, OSM, MVP, NOD2, TNFRSF1A, LILRB4, CD300A, GPRC5A, ZFYVE28, HES1, CLEC7A, IL18, LIF, HGF, LYN, SRC, PTPN1, HBEGF, CD36, VEGFA, CSF1R, BMP6, YES1, NCF1, APP, GPRC5B, GAS6, PTPN2, PRKCD, ENPP2, TNK2, SYK, VPS25, HCLS1, EHD4, IL6, TNF, ADAM17, PSEN1, ITGB2, ACVR1, EREG, PTPN6, PTPRJ, CD44, RIPK2, SH3BP5, RAP2B, TEC, ARRB2, CHMP6, CBLC, CD81, IL7, CD4, EFNA1, ITGA5, …
REACTOME	REACTOME_L1CAM_INTERACTIONS	1.22257e-05	0.000265474	0.593325	0.498391	2.0106	85	NRP1, ALCAM, AP2A1, ITGAV, LAMC1, SRC, SDCBP, ITGA2B, TUBB1, DNM1, ITGA2, ITGA9, LYPLA2, EPHB2, SHTN1, PAK1, SCN1B, NRP2, TUBA8, ACTG1, CSNK2A2, RPS6KA4, NUMB, NCAM1, MAPK3, AP2M1, TUBB6, AP2S1, MSN, ANK1, AP2A2, RDX, ACTB, SCN3B, L1CAM, RPS6KA2, DPYSL2, ITGB1, SCN4A, AP2B1, ITGA5, SPTBN2, CLTC, MAP2K1
GOBP	GOBP_NEGATIVE_REGULATION_OF_CELL_POPULATION_PROLIFERATION	1.22761e-05	0.000266098	0.593325	0.319804	1.56825	473	CCL23, ADM, ALOX5, CD9, PTGES, NIBAN2, SOD2, TNFRSF8, TREM2, HMOX1, FCGR2B, VDR, THBS1, LST1, OSM, SPINT1, LILRB4, CD300A, CXCL1, GSDME, AIF1, MAPK11, HES1, GATA2, CCL2, CTBP2, SCIN, FOSL1, IFI30, DAB2, TLR2, VSIG4, LIF, ZNF503, TSPO, TRIB1, NACC2, LYN, IL10, GPNMB, PDCD1LG2, CCL8, SPRY1, TYROBP, SKAP2, TNFRSF21, VSIR, ANG, CEBPA, MTSS1, TGFB1I1, IL1A, CSF1R, STK3, NUDT6, KLF4, CDK6, CLEC4G, CTNN…
GOBP	GOBP_ADAPTIVE_IMMUNE_RESPONSE_BASED_ON_SOMATIC_RECOMBINATION_OF_IMMUNE_RECEPTORS_BUILT_FROM_IMMUNOGLOBULIN_SUPERFAMILY_DOMAINS	1.24208e-05	0.000268758	0.593325	0.383866	1.76584	216	CLU, BATF, TRPM4, FCGR1A, CCR2, TREM2, FCGR2B, NECTIN2, SLC11A1, NOD2, HLX, CARD9, LILRB4, HFE, CTSC, BCL3, CLEC7A, IL18, JAG1, IL1R1, IL10, FCER1G, TCIRG1, TNFRSF1B, CSF2RB, TNFSF13B, TLR8, TLR4, C1QB, SEMA4A, TREX1, C1QC, CLEC4G, LOXL3, EPHB2, IL1B, NLRP3, BCL6, FUT7, NOTCH1, MYD88, ICAM1, PRKCD, C3, RAB27A, CADM1, IL6, TNF, ADAM17, CD274, PARP3, MAD2L2, SPN, SERPING1, PTPN6, STAT3, PLA2G4A, ER…
GOBP	GOBP_SUPEROXIDE_METABOLIC_PROCESS	1.26529e-05	0.000273298	0.593325	0.580126	2.11155	47	SOD2, NCF2, FPR2, ITGAM, CLEC7A, NCF4, CYBB, TYROBP, CD36, ALOX12, NCF1, GSTP1, CYBA, PRKCD, SYK, NFE2L2, ITGB2, CD177, PRDX1
bioplanet	bioplanet_Binding of chemokines to chemokine receptors	1.27311e-05	0.000274503	0.593325	0.618349	2.09352	35	PPBP, CX3CR1, CCR2, CXCL1, CCL2, CCL20, CXCL16, CCL3, CXCL3, CCR1, PF4, CCL7, CXCL6, CXCR1, CCR5, CXCL8
GOBP	GOBP_NEUTROPHIL_MEDIATED_IMMUNITY	1.27901e-05	0.000275291	0.593325	0.644188	2.1416	32	PTAFR, ANXA3, ITGAM, CARD9, SPI1, AZU1, PRAM1, CXCL6, MYD88, SYK, IL6, ADAM17, TREM1, STXBP2, ITGB2, CD177, WDR1
GOBP	GOBP_POSITIVE_REGULATION_OF_CELL_POPULATION_PROLIFERATION	1.30713e-05	0.000280849	0.593325	0.309703	1.52855	562	ADM, NRG1, CX3CR1, TRPM4, PTAFR, CCR2, GLUL, HCK, HMOX1, SPHK1, NRP1, EGFL7, THBS1, OSM, NOD2, HTRA1, HLX, TIMP1, PYCARD, TNFSF12, CLDN5, GRN, AIF1, HES1, GATA2, ITGAV, FOSL1, CLEC7A, LGMN, LAMC1, NOTCH2, IL18, LIF, TEK, TSPO, FN1, LYN, IL10, TNFRSF11A, C5AR1, MMP9, SDCBP, PDCD1LG2, PRKCI, TCIRG1, HBEGF, CSF2RB, TNFSF13B, ECM1, TLR4, NCCRP1, ITGA2, ANG, ZNF703, VEGFA, C5AR2, COMP, IL1A, CSF1R, GA…
KEGG	KEGG_REGULATION_OF_ACTIN_CYTOSKELETON	1.31992e-05	0.000282855	0.593325	0.416348	1.82812	147	MYH14, CYFIP1, ITGB5, ITGAM, VCL, BAIAP2, SCIN, ITGAV, CD14, FN1, SSH3, ITGA2B, PXN, ITGA2, MYLK, MYL12B, ITGA9, IQGAP1, MRAS, BRK1, ARPC3, CFL1, MYL9, GSN, PAK1, MYH10, RRAS, NCKAP1, ACTG1, DIAPH2, ITGAX, LIMK2, LIMK1, ITGB2, PTK2, ARHGEF12, PPP1CA, VAV3, MAPK3, PIK3CB, MSN, RDX, SOS1, ACTB, SLC9A1, ARAF, ARPC2, RHOA, NCKAP1L, CRK, ITGB1, ITGA5, FGF2, WAS, MAP2K1, SSH1, PAK3, DIAPH1, FGFR3, ACTN…
GOBP	GOBP_REGULATION_OF_ANATOMICAL_STRUCTURE_SIZE	1.32108e-05	0.000282855	0.593325	0.349214	1.65758	317	ADM, TRPM4, P2RY2, SOD2, HCK, HTR7, CYFIP1, TBXAS1, NRP1, PYCARD, DOCK4, CDC42EP2, BAIAP2, KCNMB1, SCIN, P2RX1, TMSB10, GUCY1A1, DOCK5, FN1, SSH3, CYRIA, CAPG, SEMA4A, VEGFA, RAP1GAP2, COMP, OLFM1, ADORA2B, CDC42EP3, CAPZB, ABCB8, PLEK, CTTN, SLC8A1, P2RY1, PLOD3, BRK1, ARPC3, SEMA6B, SEMA3C, ARHGAP18, ADRB2, HRH2, PRKCD, SHTN1, GSN, SCPEP1, MMP2, ESAM, NCKAP1, HCLS1, GPX1, RTN4, SPP1, PICALM, IT…
GOBP	GOBP_RESPONSE_TO_OXIDATIVE_STRESS	1.33791e-05	0.000285958	0.593325	0.343654	1.63619	328	NDUFS8, ALOX5, ALDH3B1, SOD2, VNN1, TREM2, HMOX1, MGST1, SPHK1, MCTP1, DAPK1, AIF1, FOSL1, NOL3, IDH1, FKBP1B, HGF, CAMKK2, NAPRT, IL10, G6PD, SRC, MMP9, TLR4, CD36, NUDT1, PXN, SRXN1, TLR6, IL1A, ATP2A2, TREX1, HIF1A, NCF1, APP, SLC8A1, GSTP1, CYP1B1, SLC25A24, MAP1LC3A, ZNF277, PRDX5, ERO1A, GJB2, PDE8A, ADAM9, ABCC1, PRDX3, PRKCD, RHOB, PPP2CB, SESN2, TRPM2, PPIF, MMP2, HEBP2, GPX1, IL6, NFE2L…
GOBP	GOBP_ACTIVATION_OF_IMMUNE_RESPONSE	1.34889e-05	0.000287803	0.593325	0.37168	1.72732	235	CLU, HCK, FGR, TREM2, FPR3, FPR1, LGALS3, FCGR2B, NECTIN2, STING1, NOD2, FPR2, PYCARD, LILRB4, CD300A, FCN1, CLEC7A, VSIG4, NFAM1, SH2B2, LYN, SRC, C5AR1, C3AR1, PLSCR1, TYROBP, FCER1G, TLR4, NLRC4, CFP, TNFRSF21, C1QB, PRAM1, C5AR2, TREX1, C1QC, CMKLR1, TRIM5, CFD, YES1, CD5L, BMX, CASP6, IL1B, LILRA2, PTPN2, PRKCD, C3, PHPT1, PAK1, SYK, LPXN, CFH, THEMIS2, PSEN1, RABGEF1, LIMK1, CD276, PTK2, AI…
GOBP	GOBP_PROTEIN_ACYLATION	1.39399e-05	0.000296908	0.593325	-0.32267	-1.70159	209	NFYA, BRPF3, NAP1L2, NAA30, KANSL2, TAF1, KANSL1, JADE2, PBXIP1, SIRT1, JADE1, NMT2, PRKAA1, KAT14, ING3, KAT6A, APBB1, ZDHHC17, TADA1, GATA3, KAT7, MAP3K7, SMAD4, PER1, GSK3B, BRD8, VPS72, SOX4, PPM1B, FOXO1, TADA2B, EPC1, GTF3C4, AUTS2, NAA16, DDX3X, ZDHHC6, KLF15, JADE3, HDAC2, TERF2IP, TAF5L, ARNTL, KAT6B, DIP2B, CRTC2, TAF7, DIP2A, NAT10, WDR5, NFYB, LEF1, POLE3, YEATS4, CTCF, SGF29, NCOA1, …
REACTOME	REACTOME_SPHINGOLIPID_METABOLISM	1.41252e-05	0.000300332	0.593325	0.51249	1.99186	69	ALDH3B1, SPTSSA, SPHK1, PSAP, UGCG, SPTLC2, ASAH1, B4GALNT1, CTSA, ARSB, ACER2, SGMS2, HEXB, ARSD, GLB1, HEXA, GBA, SMPD2, ALDH3A2, CERS2, PPM1L, GLTP, ARSA, SMPD3, CERK, SUMF1, GLA, ORMDL2, GM2A, GLB1L, CPTP, SMPD4, PLPP1, NEU1, ACER3, VAPB
GOBP	GOBP_AXON_DEVELOPMENT	1.44976e-05	0.000307715	0.593325	0.354426	1.66583	279	EMB, NIBAN2, CYFIP1, NRP1, ALCAM, GRN, VCL, BAIAP2, PLXNB2, NOTCH2, FKBP1B, TSPO, FLOT1, FN1, B4GALT5, GFRA3, RTN4RL2, BRSK2, NPTN, PLXNC1, TNFRSF21, SEMA4A, VEGFA, LRTM2, OLFM1, CSF1R, APLP2, KLF4, CTNNA1, LYPLA2, S100A6, CTTN, SCARF1, APP, EPHB2, DOCK7, RAB10, SEMA6B, SEMA3C, NOTCH1, PGRMC1, SHTN1, PAK1, SCN1B, LAMB2, KLF7, NRP2, MMP2, RTN4, SPP1, PICALM, RHOG, DDR1, DISC1, CDK5, PSEN1, MAPK8IP…
GOBP	GOBP_NUCLEOSOME_ORGANIZATION	1.45473e-05	0.000308237	0.593325	-0.407998	-1.89977	95	BRD2, SMARCA5, TSPYL2, NAP1L2, TSPYL1, ACTR8, HJURP, KAT6A, SPTY2D1, NFRKB, VPS72, TSPYL4, CHRAC1, GRWD1, SMARCD1, NPM1, ASF1A, PAF1, ARID2, SETD2, SART3, KAT6B, NAP1L5, CENPP, ACTR5, SMARCE1, POLE3, DNAJC9, CTCF, PIWIL1, TSPYL5, SHPRH, SUPT16H
GOBP	GOBP_POSITIVE_REGULATION_OF_TRANSPORTER_ACTIVITY	1.45824e-05	0.000308447	0.593325	0.506165	1.96857	70	PTAFR, CCR2, TREM2, IFNGR2, CCL2, CTSS, VMP1, NR1H3, STAC3, SLC6A9, RXRA, SGK1, EPHB2, GSTO1, ADRB2, ATP1B3, EHD3, PRKCD, CALM3, HTT, RNF207, ANTKMT, CDK5, GLRX, PDZK1, P2RY6, CNKSR3
GOBP	GOBP_TRNA_METHYLATION	1.46638e-05	0.000309633	0.593325	-0.565593	-2.17597	36	TRMT12, TRMT61A, MTO1, NSUN2, LCMT2, NSUN6, METTL8, TRMT10C, THUMPD2, TRMT5, TRMT11, TRMT1L, ALKBH8, TRMT61B, TRMT44, NSUN3, THUMPD3, WDR4, TRDMT1, TRMT10B, GTPBP3, TRMT10A
GOBP	GOBP_DEFENSE_RESPONSE_TO_GRAM_NEGATIVE_BACTERIUM	1.47347e-05	0.000310596	0.593325	0.636827	2.1389	33	SELP, TREM2, SLC11A1, PYCARD, SERPINE1, RNASE6, AZU1, LYZ, TLR4, MPEG1, CXCL6, GSDMD, CAMP, IL6, TREM1
bioplanet	bioplanet_Electron transport chain	1.49431e-05	0.000314448	0.593325	0.500967	1.96205	71	NDUFS8, COX6B1, NDUFV2, NDUFB7, COX4I1, NDUFB2, NDUFS6, NDUFA8, NDUFS3, UQCRH, SDHC, SURF1, COX5A, NDUFV1, COX2, ND5, NDUFB3, NDUFB8, COX8A, NDUFA9, COX17, NDUFS7, ATP8, ND4, UQCRB, NDUFC2, NDUFA10, UCP2, ND4L, NDUFAB1, UQCRC1, COX7B, NDUFB5, COX7A1, ND1, COX6C, NDUFS4, NDUFS1, NDUFB10, COX15, NDUFA6, UQCRC2, COX7A2, NDUFV3, CYTB, SLC25A27, COX1, NDUFA1, ATP6, NDUFA12, ND3
GOBP	GOBP_RESPONSE_TO_HORMONE	1.52445e-05	0.00032024	0.593325	0.308246	1.51702	542	ADM, PTAFR, ENG, TFPI, CYFIP1, HMOX1, GRB10, RAB31, THBS1, CTSB, ANXA3, UGCG, TIMP1, MMP19, RETN, AIF1, HES1, PAQR7, BAIAP2, CTSL, AGTRAP, FOSL1, DAB2, TLR2, IDH1, PRCP, CTSS, TSPO, SH2B2, CYBB, PTPRE, LYN, PTGER2, IL10, KCNQ1, ACSL1, SRC, GAS2L1, ACOD1, LPL, IL1RN, PTPN1, PRKCI, PXN, SOCS2, ITGA2, RAB13, ANG, ARSB, NR1H3, PLCB1, LTA4H, AKR1C1, LMO2, SORT1, RXRA, BMP6, LATS2, SGK1, PRKACA, CTNNA1…
REACTOME	REACTOME_INTEGRIN_CELL_SURFACE_INTERACTIONS	1.54649e-05	0.000323586	0.57561	0.589884	2.10083	43	VWF, ITGB5, THBS1, COL9A2, ITGAM, ITGAV, FN1, ITGA2B, ITGA2, COMP, ITGA9, ICAM3, ICAM1, SPP1, ITGAX, ITGB2, COL10A1
WP	WP_LUNG_FIBROSIS	1.54649e-05	0.000323586	0.57561	0.615987	2.1447	39	CCR2, SERPINA1, PLAU, HMOX1, TIMP1, CCL2, HGF, CCL3, MMP9, PTX3, MT2A, CEBPB, ATP11A, IL1B, MMP2, IL6, SPP1, NFE2L2, TNF, CXCL8, CYSLTR2
GOBP	GOBP_INTERLEUKIN_8_PRODUCTION	1.55095e-05	0.000323586	0.57561	0.529658	2.01764	61	TLR5, NOD2, PYCARD, FCN1, BCL3, CLEC7A, TLR2, SERPINE1, CD14, IL10, TLR8, TLR4, TLR6, C5AR2, TLR1, KLF4, ARRB1, F3, IL1B, LILRA2, MYD88, SYK, IL6, TNF, ANXA4
GOBP	GOBP_MRNA_3_END_PROCESSING	1.54903e-05	0.000323586	0.57561	-0.498059	-2.12307	58	SCAF8, RPRD2, ZNF473, CSTF2T, CPSF7, VIRMA, TENT2, CPSF6, WDR33, PAPOLG, POLR2D, CLP1, NUDT21, CDC73, CSTF1, PAF1, CSTF3, PAPOLA, MTPAP, YTHDC1, CCNT1, RPRD1B, CTR9, PNPT1, ZC3H14, CDK9, CPSF4
GOBP	GOBP_REGULATION_OF_EPITHELIAL_CELL_MIGRATION	1.56596e-05	0.000326161	0.57561	0.413788	1.82613	154	GLUL, HMOX1, NRP1, THBS1, ANXA3, GRN, GATA2, LGMN, PRCP, TEK, DOCK5, SPRED1, SRC, MMP9, HBEGF, ITGA2, SASH1, ARSB, SEMA4A, VEGFA, KLF4, HIF1A, SPARC, MAP2K3, CORO1C, NOTCH1, ADAM9, RHOB, RIN2, RRAS, ENPP2, CIB1, NRP2, GLIPR2, RTN4, ITGB1BP1, NFE2L2, TNF, ADAM17, PTK2, MIR29A, APOE, PTGS2, PIK3CB, CALR, AKT1, CTSH, EDN1, NUS1, CLASP2, P2RX4, HSPB1, MET, RHOA, AAMP, EFNA1, SYNJ2BP, ATP5F1B, VIL1, P…
REACTOME	REACTOME_INSULIN_RECEPTOR_RECYCLING	1.5721e-05	0.000326884	0.57561	0.754626	2.15549	17	ATP6V0D2, ATP6V1A, TCIRG1, ATP6V0D1, ATP6V0A1, ATP6V1D, ATP6AP1, ATP6V1B2, INSR, ATP6V0E1
PID	PID_INTEGRIN_A9B1_PATHWAY	1.58846e-05	0.00032898	0.57561	0.778862	2.16786	15	F13A1, FN1, SRC, PXN, VEGFA, ITGA9, SAT1, ADAM15, ADAM8, SPP1, TGM2
bioplanet	bioplanet_Alpha-9 beta-1 integrin pathway	1.58846e-05	0.00032898	0.57561	0.778862	2.16786	15	F13A1, FN1, SRC, PXN, VEGFA, ITGA9, SAT1, ADAM15, ADAM8, SPP1, TGM2
GOBP	GOBP_LIPOSACCHARIDE_METABOLIC_PROCESS	1.59258e-05	0.00032898	0.57561	0.494991	1.95523	76	UGCG, PGAP1, B4GALNT1, AOAH, B4GALT5, FUCA1, NAGA, A4GALT, HEXB, B3GNT5, PRKCD, GLB1, HEXA, GBA, ST8SIA4, ST3GAL4, PIGS, PGAP2, GLTP, GPAA1, ST3GAL6, ST6GALNAC4, ST3GAL2, PIGT, ST6GALNAC3, CERK, SUMF1, GLA, PIGF, GM2A, B3GALT4, LARGE1, CPTP, PIGN, PIGP, BAX, DPM2, B4GALT4, NEU1, PIGQ, PIGW, TM9SF2
REACTOME	REACTOME_NUCLEAR_SIGNALING_BY_ERBB4	1.59292e-05	0.00032898	0.57561	0.690175	2.16444	24	NRG1, SRC, HBEGF, GFAP, SPARC, ADAP1, PSENEN, NCSTN, ADAM17, PSEN1, WWOX, NCOR1, EREG, APOE, YAP1, PSEN2, APH1A, APH1B
GOBP	GOBP_NUCLEIC_ACID_PHOSPHODIESTER_BOND_HYDROLYSIS	1.60731e-05	0.000331392	0.57561	-0.321271	-1.69573	212	CNOT8, CSTF2T, XPC, SLFN13, PDE12, TDP2, ABT1, CNOT6L, CPSF7, CPSF6, TDP1, ERI1, PELO, LAS1L, MRE11, ELAC1, CNOT2, TSNAX, EME1, PNRC2, RPP38, FANCM, CNOT1, FAN1, ERCC4, NUDT21, CNOT7, ISG20L2, AGO3, ERI2, APLF, DROSHA, NUDT12, CSTF3, EXOSC9, N4BP2, MRPL44, ASTE1, SMG6, HARBI1, CNOT6, EXOSC4, EDC4, BMS1, ANKRD31, TSN, DCLRE1B, REXO4, POP1, RAD9A, AEN, TSR1, EXOSC8, NOP9, N4BP1, RPP21, POLD1, PIWIL…
bioplanet	bioplanet_TNF-alpha effects on cytokine activity, cell motility, and apoptosis	1.63012e-05	0.00033553	0.57561	0.461559	1.90705	95	NRG1, SOD2, SELP, SPHK1, CXCL1, IFNGR2, CCL2, CD14, JAG1, HGF, CXCL3, MMP9, IL1RN, HBEGF, CSF2RB, CCR1, IL1A, TNFAIP2, CMKLR1, IL1B, IFNAR2, NOTCH1, PTPN2, ICAM1, PDZD2, KLF7, IL1R2, GPX1, IL6, TFPI2, TNF, DDR1, ABCA7, LFNG, CXCL8, BCL2A1, CD58, CD44, RIPK2, CD70, IL2RA, IGFBP2, TNFRSF10B, IL7, EFNA1, ITGA5, NFKBIE
REACTOME	REACTOME_SUMOYLATION_OF_CHROMATIN_ORGANIZATION_PROTEINS	1.63383e-05	0.00033573	0.57561	-0.495072	-2.08275	54	NUP107, NUP160, NUP43, PHC3, PIAS1, PHC1, RAE1, NUP54, PHC2, PIAS2, HDAC1, CBX8, SUZ12, NUP35, HDAC2, NUP42, CBX4, NUP88, NUP155, SATB1, SCMH1, H4C2, RANBP2, NUP62, NUP133, NUP210, CHD3, RNF2, CBX2
bioplanet	bioplanet_Cell cycle	1.6718e-05	0.000342956	0.57561	-0.26408	-1.47116	386	SMAD3, SMARCA5, CEP76, TUBA4A, ODF2, CDC23, SKP2, STAG1, GADD45A, PPP2R5A, NUP107, MIS12, NUP160, SYNE1, AHCTF1, RBL2, ORC4, CEP135, RPA2, NUP43, STAG2, HJURP, TERF2, TUBGCP3, YWHAZ, CCP110, RAD21, TUBGCP5, BUB3, NUMA1, CEP57, POT1, ZW10, CDKN1B, SMAD2, NEDD1, RFC5, CEP70, SMAD4, CENPJ, CDC7, GSK3B, PCM1, DSN1, PCNA, BTRC, NPM1, CDC26, CDC14A, PLK4, PTTG1, HDAC1, HDAC7, LIN9, TERF1, HDAC2, CUL1, …
GOBP	GOBP_POSITIVE_REGULATION_OF_LIPID_TRANSPORT	1.68358e-05	0.000344796	0.57561	0.549465	2.02314	52	ABCG4, PTGES, TREM2, RETN, LRP1, DAB2, ACSL1, TNFRSF11A, NR1H3, IL1A, RXRA, BMP6, LPCAT3, ANXA2, DBI, IL1B, PRELID1, PRKCD, SPP1, ABCA7, TMEM30A, PLA2G4A, APOE, ABCA1, EDN1, P2RX4, PLA2G6, ACSL5, SCP2
GOBP	GOBP_POSITIVE_REGULATION_OF_LEUKOCYTE_DEGRANULATION	1.68752e-05	0.000345025	0.57561	0.743314	2.18247	19	PTAFR, FGR, ITGAM, GATA2, ADORA2B, GAB2, SYK, LAMP1, ITGB2, CD177
GOBP	GOBP_MYELOID_CELL_DIFFERENTIATION	1.71043e-05	0.000349127	0.57561	0.353726	1.67059	297	BATF, SNX10, RASGRP4, TREM2, SBNO2, TNFAIP6, LILRB4, SPI1, MAPK11, GATA2, FES, SCIN, TLR2, MPIG6B, NOTCH2, CSF3R, LIF, RHAG, JAG1, LTBR, TRIB1, CCL3, LYN, OSCAR, KCNQ1, G6PD, SRC, TNFRSF11A, MMP9, MAFB, TYROBP, TCIRG1, TLR4, CCR1, PF4, CEBPA, VEGFA, CSF1R, GAB2, C1QC, CDK6, HIF1A, CEBPB, ANXA2, CLEC1B, APP, CDKN1C, BCL6, PDE1B, ESRRA, BATF3, PTPN2, PRDX3, MTURN, TET2, CIB1, CD109, HCLS1, ATP6AP1,…
GOBP	GOBP_REGULATION_OF_PHOSPHORUS_METABOLIC_PROCESS	1.72921e-05	0.000352373	0.57561	0.284296	1.43523	950	CLU, MARCO, NRG1, CX3CR1, S100A12, PTAFR, ENG, FCGR1A, FGR, TNFAIP8L3, TREM2, FAM20A, LGALS3, LILRA5, GRB10, SPHK1, NRP1, PLAUR, SLC11A1, THBS1, OSM, MVP, MERTK, NOD2, FPR2, PYCARD, TNFRSF1A, LILRB4, CD300A, GPRC5A, LDLR, ZFYVE28, AIF1, HES1, IRAK3, HFE, LRP1, ENO1, CLEC7A, DUSP6, DAB2, IDH1, PLXNB2, PRKAR2B, IL18, FKBP1B, LIF, TEK, AZU1, TRIB1, FLOT1, HGF, FN1, CAMKK2, SPRED1, LYN, ACSL1, GPNMB,…
GOBP	GOBP_MODIFICATION_DEPENDENT_MACROMOLECULE_CATABOLIC_PROCESS	1.74679e-05	0.000355364	0.57561	-0.244679	-1.43043	557	SMAD7, SUFU, PYHIN1, BAG5, FBXL14, USP13, TNFAIP3, BIRC2, MYLIP, FBXL4, SIAH2, RNF103, HECTD1, CDC23, TAF1, WAC, SKP2, SOCS5, USP47, GID4, FBXL3, SMURF2, RNF139, SIRT1, RNF26, FBXL5, USP20, FBXO33, FBXW8, KLHL3, STAM, TLK2, RMND5A, RNF122, UBE2J1, ITCH, SPOP, TOPORS, UBXN7, DNAJB2, KLHL8, TRIB3, UBE2Z, NEDD4, APPBP2, FBXO38, KBTBD7, KLHDC1, UBE3C, GSK3B, FAM8A1, TBX21, PIAS1, FBXW4, MKRN2, ASB2, …
GOBP	GOBP_INORGANIC_ANION_TRANSPORT	1.79303e-05	0.000364166	0.57561	0.457998	1.89676	100	PTAFR, ABCC4, SLC11A1, SLC1A3, SLC37A2, TSPO, KCNQ1, CLIC1, ABCC3, TTYH3, CLCN5, CEBPB, PCYOX1, BEST1, LRRC8B, ABCC1, SLC26A8, TTYH2, VDAC1, ANO8, P2RY6, ANO10, ABCC6, SLC12A9, ANO6, CLDN4, SLC26A11, SLC26A10, TG, VDAC2, GLRB, SLC25A11, CLCN6, ABCC2, CLCN2
bioplanet	bioplanet_Thymic stromal lymphopoietin (TSLP) pathway	1.82479e-05	0.000370002	0.57561	0.523109	2.0299	67	CD9, CCR2, CXCL1, CCL2, CCL20, BCL3, JAG1, IL1R1, CCL3, CXCL3, IL10, TNFRSF11A, CCR1, KYNU, IL1B, IDO1, CISH, IL15RA, ICAM1, IL6, CD274, CD276, PSME2, CD86, CCR5, CXCL8, CD82, PSMB9, CLDN4, IL2RA, PDCD5, TNFSF14, PSMB2, IL15, PSMB10, PSMB4, PSMA5, CSF1, PSMB8, PSMA4, TNFSF4, CCL22, TNFRSF9
GOBP	GOBP_APOPTOTIC_SIGNALING_PATHWAY	1.86252e-05	0.000377029	0.57561	0.317724	1.55518	464	CLU, CX3CR1, S100A9, SOD2, VNN1, TREM2, S100A8, HMOX1, LGALS3, NRP1, PLAUR, THBS1, DAPK1, CASP4, PYCARD, ITGAM, TNFRSF1A, TNFSF12, SPI1, GSDME, CTSC, BCL3, ENO1, ITGAV, NOL3, G0S2, CASP1, SERPINE1, LTBR, HGF, NACC2, SRC, MMP9, PTPN1, TYROBP, TNFRSF1B, BRSK2, PF4, CTH, IL1A, STK3, WFS1, SORT1, HIF1A, TCF7L2, PTTG1IP, MDM2, CTNNA1, CEBPB, CASP6, CTTN, GSTP1, STYXL1, IL1B, HIP1, YBX3, CYP1B1, APAF1,…
GOBP	GOBP_NEGATIVE_REGULATION_OF_IMMUNE_RESPONSE	1.87692e-05	0.000379317	0.57561	0.429634	1.8408	125	CCR2, HCK, FGR, TREM2, HMOX1, LGALS3, FCGR2B, NOD2, HLX, LILRB4, CD300A, SPI1, GRN, FGL2, IRAK3, HFE, VSIG4, RHBDF2, LYN, IL10, SRC, ACOD1, NR1H3, TREX1, CLEC4G, YES1, LOXL3, BCL6, FURIN, PTPN2, SYK, GPX1, ARG2, RABGEF1, PARP3, SAMHD1, IFI16, SERPING1, PTPN6
GOBP	GOBP_REGULATION_OF_TUBE_SIZE	1.88933e-05	0.00038051	0.57561	0.500533	1.97124	75	ADM, TRPM4, P2RY2, SOD2, HTR7, TBXAS1, DOCK4, KCNMB1, P2RX1, GUCY1A1, DOCK5, COMP, ADORA2B, SLC8A1, P2RY1, PLOD3, ADRB2, HRH2, SCPEP1, MMP2, GPX1, ITGB1BP1, ARHGAP42, TNF, RGS2, APOE, PTGS2, EDN1, PLA2G6, HTR2B, RHOA, GCLM, KCNMA1, NOS3, SOD1, ADRB1, PER2, ATP2B1
PID	PID_INTEGRIN5_PATHWAY	1.89214e-05	0.00038051	0.57561	0.853781	2.0608	9	ITGB5, PLAU, PLAUR, ITGAV, FN1, TGFBR1
bioplanet	bioplanet_Integrin beta-5 pathway	1.89214e-05	0.00038051	0.57561	0.853781	2.0608	9	ITGB5, PLAU, PLAUR, ITGAV, FN1, TGFBR1
GOBP	GOBP_CARBOHYDRATE_METABOLIC_PROCESS	1.90168e-05	0.000381177	0.57561	0.325064	1.57857	422	PTAFR, PYGL, HK3, HK2, SCARB2, IGFBP4, ENO1, AP2A1, IDH1, CHST15, B4GALNT1, AOAH, B4GALT5, FUCA1, KCNQ1, G6PD, SRC, DGAT2, RENBP, PGD, GALK1, GK5, GNPDA1, SLC2A6, NPL, SLC2A5, TREX1, PFKFB3, HIF1A, MANBA, LDHA, PFKFB4, CS, PLEK, APP, TKTL1, CHIT1, TALDO1, P2RY1, GAPDH, FUT7, NAGA, GSTO1, HEXB, GAA, PTPN2, SORD, PGAM1, TPI1, PGK1, MPDU1, SESN2, FABP5, GYG1, NLN, GLB1, NANS, SLC35A2, ATF3, TNF, HEX…
GOBP	GOBP_POSITIVE_REGULATION_OF_EPITHELIAL_CELL_MIGRATION	1.8991e-05	0.000381177	0.57561	0.455185	1.89491	107	HMOX1, NRP1, THBS1, ANXA3, GRN, GATA2, LGMN, TEK, DOCK5, SRC, MMP9, HBEGF, ITGA2, SASH1, VEGFA, HIF1A, SPARC, MAP2K3, ADAM9, RHOB, RIN2, RRAS, ENPP2, CIB1, NRP2, GLIPR2, RTN4, ITGB1BP1, NFE2L2, ADAM17, MIR29A, PTGS2, PIK3CB, CALR, AKT1, CTSH, EDN1, NUS1, CLASP2, P2RX4, HSPB1, MET, AAMP, ATP5F1B, VIL1, PPM1F, FGF2, NOS3
HALLMARK	HALLMARK_GLYCOLYSIS	1.92113e-05	0.000384445	0.57561	0.410028	1.81929	158	PYGL, MERTK, HK2, ENO1, PLOD1, NOL3, IDH1, VCAN, G6PD, SDC3, GALK1, SLC16A3, GNPDA1, ANG, VEGFA, CTH, TGFBI, ADORA2B, AK4, LDHA, IL13RA1, IER3, CASP6, TKTL1, TALDO1, QSOX1, ERO1A, SRD5A3, GMPPB, PAM, PPP2CB, PGAM1, TPI1, PPFIA4, PGK1, SDC2, GLRX, PPIA, SDHC, UGP2, SAP30, CD44, P4HA2, GALE, PFKP, AKR1A1, MDH2, CITED2, MET, HDLBP, SPAG4, GYS1, GMPPA
REACTOME	REACTOME_GLYCOSPHINGOLIPID_METABOLISM	1.97919e-05	0.000395383	0.57561	0.608835	2.06131	35	PSAP, UGCG, ASAH1, B4GALNT1, CTSA, ARSB, HEXB, ARSD, GLB1, HEXA, GBA, SMPD2, GLTP, ARSA, SMPD3, CERK, SUMF1, GLA, GM2A, GLB1L, CPTP, SMPD4, NEU1
GOBP	GOBP_COMPLEMENT_ACTIVATION	1.98224e-05	0.000395383	0.57561	0.642047	2.10699	30	CLU, TREM2, FCN1, VSIG4, CFP, C1QB, C1QC, CFD, CD5L, IL1B, C3, CFH, SERPING1, FCN2
bioplanet	bioplanet_Integrin cell surface interactions	2.04104e-05	0.000406273	0.57561	0.56515	2.11678	54	VWF, ITGB5, THBS1, ITGAM, ITGAV, LAMC1, FN1, SRC, PTPN1, ITGA2B, ITGA2, ITGA9, ICAM3, ICAM1, TLN1, LAMB2, SYK, SPP1, ITGAX, ITGB2, PTK2, AKT1, RAP1A, SOS1, CRK, ITGB1, ITGA5, SHC1, GRB2
GOBP	GOBP_REGULATION_OF_CATION_CHANNEL_ACTIVITY	2.04679e-05	0.000406273	0.57561	0.469807	1.91459	89	CCR2, TREM2, STOM, DAPK1, IFNGR2, CCL2, FKBP1B, CTSS, KCNQ1, MMP9, GEM, STAC3, GPR35, SLC6A9, PRKACA, APP, EPHB2, CBARP, GSTO1, ADRB2, CAPN1, EHD3, CALM3, HTT, JSRP1, RNF207, ANTKMT, CDK5, P2RY6, FKBP1A, SRI, AHNAK, KCNE3, EDN1, PLA2G6, RASGRF1
GOBP	GOBP_TISSUE_REMODELING	2.04583e-05	0.000406273	0.57561	0.464366	1.92182	99	RAB3D, CCR2, SNX10, VDR, TIMP1, NOL3, NOTCH2, LIPA, IL18, LIF, JAG1, GPNMB, SRC, TNFRSF11A, TCIRG1, IL1A, CSF1R, HIF1A, MDM2, CST3, SEMA3C, TPP1, ADRB2, CAPN1, ADAM8, SYK, MMP2, CHD7, IL6, SPP1, MITF, PPARGC1B
GOBP	GOBP_ACTIN_POLYMERIZATION_OR_DEPOLYMERIZATION	2.09649e-05	0.000415465	0.57561	0.420934	1.84184	143	HCK, CYFIP1, MSRB1, PYCARD, PSTPIP2, CDC42EP2, AIF1, BAIAP2, SCIN, TMSB10, SSH3, CYRIA, CAPG, ANG, CDC42EP3, ARHGAP6, CAPZB, WASHC3, PLEK, CTTN, GAS7, BRK1, ARPC3, CFL1, ARHGAP18, PRKCD, GSN, ESAM, NCKAP1, HCLS1, CATIP, COTL1, DBNL, MICALL2, TWF2, MSRB2, EPS8, WDR1, MTPN, MICAL1, RDX, FLII, ARPC2, VASP, CAPZA2, RHOA, NCKAP1L, DSTN, TMOD3, MICAL2, VIL1, PPP1R9B, SPTBN2, SNX9, WAS, GRB2, NCK2, DMTN…
GOBP	GOBP_POSITIVE_REGULATION_OF_TRANSMEMBRANE_TRANSPORT	2.13481e-05	0.000422375	0.57561	0.437537	1.87668	127	PTAFR, CCR2, TREM2, IFNGR2, CCL2, KCNMB1, P2RX1, CTSS, KCNQ1, ACSL1, G6PD, PRKCI, VMP1, STAC3, SLC6A9, RHOQ, EPHB2, CAPN3, GSTO1, ADRB2, ATP1B3, EHD3, C3, SLC1A2, CALM3, KCNJ2, HTT, NFE2L2, RNF207, ANTKMT, CDK5, PSEN1, INSR, GLRX, PDZK1, P2RY6, CNKSR3, SRI, ANO6, AKT1, CEMIP, EDN1, SLC9A1, MEF2A, ACSL5
GOBP	GOBP_PROTEIN_LOCALIZATION_TO_EXTRACELLULAR_REGION	2.24356e-05	0.000443061	0.57561	0.372475	1.7275	223	ALOX5, WLS, TRPM4, RAB3D, GLUL, TREM2, STEAP3, ICA1, TLR2, RHBDF2, FKBP1B, GPR27, IL1RN, FRMD4A, TCIRG1, BRSK2, UNC13B, TLR4, RAB13, ANG, NR1H3, COMP, IL1A, HIF1A, BMP6, TCF7L2, PLEK, RAB11FIP5, LTBP1, STX1A, IL1B, SLC8B1, RAB10, PIM3, ADAM9, PAM, ADAM8, MYH10, RAB27A, TRPM2, KLF7, RAB11FIP1, APBB3, VPS35, COPG1, IL6, TNF, ERP29, PFKL, BLOC1S6, ACSL4, PPIA, ADTRP, SRI, PDIA4, NAGPA, SUCNR1, APOE,…
bioplanet	bioplanet_Fc gamma receptor-mediated phagocytosis	2.2466e-05	0.000443061	0.57561	0.510582	2.00685	74	FCGR1A, HCK, ASAP2, FCGR2B, SPHK1, PLD1, SCIN, LYN, MARCKS, DNM1, GAB2, NCF1, ARPC3, CFL1, PRKCD, GSN, PAK1, SYK, LIMK2, LIMK1, MYO10, PLA2G4A, PLD2, VAV3, MAPK3, PIK3CB, AKT1, PLA2G6, ARPC2, VASP
PID	PID_IL8_CXCR1_PATHWAY	2.27424e-05	0.000447792	0.57561	0.684727	2.14736	24	HCK, FGR, PLD1, LYN, DNM1, PLCB1, ARRB1, GNA15, CXCR1, GNB1, CXCL8, PLCB2, AKT1, PLCB3, ARRB2
GOBP	GOBP_REGULATION_OF_ANTIGEN_PROCESSING_AND_PRESENTATION_OF_PEPTIDE_OR_POLYSACCHARIDE_ANTIGEN_VIA_MHC_CLASS_II	2.29451e-05	0.000451058	0.57561	0.985402	1.6357	3	TREM2, THBS1, PYCARD
GOBP	GOBP_NEUTROPHIL_ACTIVATION_INVOLVED_IN_IMMUNE_RESPONSE	2.34462e-05	0.000459975	0.57561	0.738597	2.16862	19	PTAFR, ANXA3, ITGAM, SPI1, TYROBP, FCER1G, PRAM1, LILRA2, MYD88, SYK, STXBP2, ITGB2, CD177
REACTOME	REACTOME_ECM_PROTEOGLYCANS	2.34738e-05	0.000459975	0.57561	0.615897	2.09705	37	ITGB5, COL9A2, ITGAV, LAMC1, SERPINE1, FN1, VCAN, ITGA2B, ITGA2, COMP, ITGA9, SPARC, APP, LAMB2, ITGAX
GOBP	GOBP_REGULATION_OF_NEUTROPHIL_ACTIVATION	2.35706e-05	0.000461132	0.57561	0.786391	2.13038	13	PTAFR, FCGR2B, ITGAM, CD300A, SPI1, GRN, PRAM1, SYK, TNF, ITGB2, CD177
WP	WP_FOLATE_METABOLISM	2.36495e-05	0.000461938	0.57561	0.594941	2.10208	42	SOD2, SLC46A1, LDLR, CCL2, MTHFD2, SERPINE1, CTH, MTHFR, IL1B, ICAM1, FOLR2, GPX1, IL6, TNF, INSR, MTHFS, ABCA1, CAT, MPO, MTHFD1
GOBP	GOBP_NUCLEAR_TRANSCRIBED_MRNA_CATABOLIC_PROCESS_DEADENYLATION_DEPENDENT_DECAY	2.40187e-05	0.000468403	0.57561	-0.501544	-2.12646	57	CNOT8, PDE12, HNRNPU, CNOT6L, ZFP36L2, CSDE1, TOB1, CNOT2, CNOT1, HNRNPD, TNRC6C, POLR2D, CNOT7, DHX9, RC3H2, EXOSC9, EIF4ENIF1, TNRC6B, BTG2, CNOT6, PAIP1, NT5C3B, PATL2, EXOSC8, EXOSC2, DCP1B, DIS3, EXOSC3, DCP1A, TUT4
GOBP	GOBP_OLIGOSACCHARIDE_METABOLIC_PROCESS	2.42978e-05	0.000473093	0.57561	0.605088	2.04863	35	MANBA, FUT7, NAGA, HEXB, GAA, MPDU1, GANC, ST8SIA4, ST3GAL4, MOGS, CTBS, ST3GAL6, ST6GALNAC4, ST3GAL2, ST6GALNAC3, GLA, GM2A, B3GALT4, B4GALT1, NEU1
WP	WP_GPCRS_CLASS_A_RHODOPSINLIKE	2.44831e-05	0.000475944	0.57561	0.475871	1.94596	88	CX3CR1, PTAFR, CCR2, P2RY2, HTR7, FPR3, FPR1, FPR2, GPR27, PTGER2, C3AR1, P2RY13, P2RY12, CCR1, C5AR2, GPR35, ADORA2B, CMKLR1, CCRL2, P2RY1, ADRB2, HRH2, PTGIR, CXCR1, P2RY6, LTB4R, CCR5, GPR22, CYSLTR2, SUCNR1, F2RL2
GOBP	GOBP_MRNA_TRANSPORT	2.46183e-05	0.000477814	0.57561	-0.390445	-1.82049	98	G3BP2, NUP107, NUP160, SENP2, AHCTF1, NUP43, NSUN2, THOC3, POLDIP3, SMG5, FYTTD1, POLR2D, UPF2, RAE1, NUP54, DHX9, SMG7, PCID2, CHTOP, NUP35, NXF1, SETD2, SMG6, AKAP8L, ALKBH5, NUP42, ZC3H11A, XPO1, UPF1, YTHDC1, NXT1, NUP88, NUP155, RANBP2, NUP62, DDX39A, NUP133, NUP210, ZFP36, UPF3B, GLE1, ALYREF, MCM3AP, TNKS
REACTOME	REACTOME_COHESIN_LOADING_ONTO_CHROMATIN	2.4743e-05	0.000479475	0.57561	-0.835868	-2.20719	10	STAG1, WAPL, STAG2, RAD21, PDS5B, PDS5A, MAU2
GOBP	GOBP_LIPID_BIOSYNTHETIC_PROCESS	2.47897e-05	0.00047962	0.57561	0.312663	1.53695	487	ABCG4, ADM, ALOX5, PTGES, ALDH3B1, TBXAS1, SPTSSA, SPHK1, UGCG, CYP39A1, DAGLB, LDLR, PLD1, PGAP1, HACD4, P2RX1, DAB2, IDH1, SPTLC2, ASAH1, B4GALNT1, TSPO, PCYT1A, B4GALT5, ACSL1, G6PD, PLA2G15, DGAT2, LPL, PLSCR1, SERINC5, SOCS2, LPCAT2, ANG, NR1H3, DHRS9, IL1A, TREX1, CBR1, ACSS2, SC5D, ELOVL7, BMP6, ALOX12, BMX, LPCAT3, GSTP1, IL1B, PMVK, ACER2, A4GALT, CISH, AGPAT2, SGMS2, HEXB, SRD5A3, B3GNT…
GOBP	GOBP_ANTIGEN_PROCESSING_AND_PRESENTATION_OF_PEPTIDE_ANTIGEN	2.53539e-05	0.000489762	0.57561	0.627651	2.10808	33	TREM2, FCGR2B, SLC11A1, CTSD, PYCARD, HFE, CTSL, LGMN, IFI30, CTSS, FCER1G, CLEC4A
GOBP	GOBP_PLATELET_AGGREGATION	2.60923e-05	0.000503232	0.57561	0.545854	2.05746	56	CD9, EMILIN2, VCL, FN1, LYN, CLIC1, P2RY12, COMP, ALOX12, PLEK, GP1BA, MYL9, FERMT3, PRKCD, TLN1, SYK, IL6, ACTG1, SERPINE2, PPIA, ILK, PTPN6, PEAR1, CSRP1, PIK3CB, SLC7A11, RAP2B, ACTB, GP6, HSPB1
GOBP	GOBP_POSITIVE_REGULATION_OF_LEUKOCYTE_CHEMOTAXIS	2.63671e-05	0.000507733	0.57561	0.517924	2.00977	67	CX3CR1, CCR2, THBS1, FPR2, SPI1, AIF1, LGMN, SERPINE1, CCL3, C5AR1, C3AR1, CCR1, VEGFA, CSF1R, CCL7, CMKLR1, GAS6, PLA2G7, IL6, ADAM17, MOSPD2, PTK2, CXCL8, CREB3, ANO6, MAPK3, CALR, OXSR1, EDN1
KEGG	KEGG_FC_GAMMA_R_MEDIATED_PHAGOCYTOSIS	2.65935e-05	0.000511288	0.57561	0.495156	1.95647	77	FCGR1A, HCK, ASAP2, FCGR2B, SPHK1, PLD1, SCIN, LYN, MARCKS, DNM1, GAB2, NCF1, ARPC3, CFL1, PRKCD, GSN, PAK1, SYK, LIMK2, LIMK1, MYO10, PLA2G4A, PLD2, VAV3, MAPK3, PIK3CB, AKT1, PLA2G6, ARPC2, VASP
REACTOME	REACTOME_SUMOYLATION_OF_RNA_BINDING_PROTEINS	2.69765e-05	0.000517839	0.57561	-0.549078	-2.18251	41	NUP107, NUP160, NUP43, PHC3, HNRNPK, PHC1, RAE1, NUP54, PHC2, CBX8, NUP35, NUP42, CBX4, HNRNPC, NUP88, NUP155, SCMH1, RANBP2, NUP62, NUP133, NUP210, RNF2, CBX2, NOP58
GOBP	GOBP_POSITIVE_REGULATION_OF_CELL_ADHESION	2.72355e-05	0.000521992	0.57561	0.347937	1.64223	294	ALOX5, ZFHX3, PTAFR, CCR2, VNN1, SELP, EMILIN2, NRP1, PLAUR, NOD2, HLX, PYCARD, LILRB4, AIF1, HES1, CCL2, ITGAV, DAB2, IL18, LIF, TEK, DOCK5, AZU1, FLOT1, FN1, LYN, IL10, SRC, PDCD1LG2, P2RY12, TNFSF13B, CD36, ITGA2, VSIR, VEGFA, IL1A, MYB, CDK6, YES1, MAP3K8, IL1B, NLRP3, BCL6, FUT7, DPP4, ADAM9, RIN2, ADAM8, RRAS, ADAM19, SYK, CIB1, IL6, ITGB1BP1, TNF, DISC1, CD274, CD276, ITGB2, CD86, ILK, PTP…
GOBP	GOBP_ORGANIC_ACID_TRANSPORT	2.75668e-05	0.000527516	0.57561	0.39505	1.77693	181	EMB, PTGES, AQP9, SLC47A1, ABCC4, SLC46A1, THBS1, SLC1A3, SLC7A7, SLC22A4, ACSL1, TNFRSF11A, SERINC5, ABCC3, CD36, SLC43A2, SLCO2B1, SLC16A3, IL1A, AKR1C1, SLC6A6, SLC6A9, SLC36A4, GFAP, SLC7A8, IL1B, ABCC1, PLIN2, APBA1, SLC1A2, SLC26A8, FABP5, SYK, FOLR2, SLC38A7, TNF, RGS2, PSEN1, SLC1A5, PLA2G4A, APOE, CPT1B, SLC26A10, MFSD2A, SLC38A10, AKT1, SLC7A11, EDN1, SLC36A1, SLC66A1, SLC27A4, SLC7A9, …
GOBP	GOBP_POSITIVE_REGULATION_OF_NEUROINFLAMMATORY_RESPONSE	2.76595e-05	0.000528465	0.57561	0.816631	2.14374	12	TREM2, CTSC, IL18, CCL3, IL1B, TTBK1, IL6, TNF
bioplanet	bioplanet_G alpha (i) signaling events	2.8597e-05	0.000545525	0.57561	0.454821	1.87921	95	PPBP, CCL23, CCR2, FPR3, FPR1, RGS18, FPR2, CXCL1, GNB4, CCL20, CXCL16, CXCL3, C5AR1, C3AR1, P2RY13, P2RY12, CCR1, PF4, OXER1, CXCL6, RGS19, HEBP1, APP, GNG11, ADCY4, C3, CXCR1, GNB1, GNG5, CCR5, CXCL8, GNB2
GOBP	GOBP_MEMBRANE_ORGANIZATION	2.86428e-05	0.00054555	0.57561	0.304078	1.5021	569	CLU, MARCO, GCA, CD9, S100A9, FCGR1A, DYSF, TNFAIP8L3, RAB20, UBXN2B, TREM2, FCGR2B, RAB31, NECTIN2, SPHK1, MSR1, THBS1, HK2, UGCG, ITGAM, CD300A, AIF1, GATA2, BAIAP2, CTSL, MTSS2, STX11, CLEC7A, NOL3, CAVIN2, TSPO, FLOT1, MYOF, PLSCR1, PRKCI, CIBAR1, NPC2, CD36, DNM1, ITGA2, RAB13, LPCAT2, SEC31B, VMP1, MTSS1, ATP2A2, PITPNA, ATP2C1, LPCAT3, ANXA2, EPB41L3, EPHB2, STX1A, ATP11A, CORO1C, SH3GLB1,…
GOBP	GOBP_CELLULAR_RESPONSE_TO_INTERFERON_GAMMA	2.88279e-05	0.000548222	0.57561	0.490612	1.94675	78	CCL23, HCK, RAB20, DAPK1, CDC42EP2, AIF1, ZYX, CCL2, CCL20, TLR2, CASP1, CCL3, ACOD1, CCL8, TLR4, NR1H3, CCL7, MRC1, GAPDH, PTPN2, VIM, GSN, ACTG1, TNF
REACTOME	REACTOME_SMOOTH_MUSCLE_CONTRACTION	2.89095e-05	0.000548923	0.57561	0.650004	2.11242	29	DYSF, ITGB5, GUCY1B1, VCL, GUCY1A1, PXN, MYLK, TPM4, MYL12B, ANXA2, MYL9, PAK1, TLN1, MYL6B, TPM3
GOBP	GOBP_SMALL_MOLECULE_CATABOLIC_PROCESS	2.90831e-05	0.000551364	0.57561	0.359701	1.67616	253	UPP1, ALDH3B1, GLUL, HK3, DPYD, HK2, CYP39A1, ENO1, NQO2, HAL, PLA2G15, RENBP, PGD, GALK1, GK5, NUDT1, APOBEC3A, GNPDA1, NPL, KYNU, ACAD10, IVD, SCARF1, TKTL1, CDA, IDO1, FUT7, AADAT, SRD5A3, ACOT8, SORD, ASRGL1, ABHD2, TPI1, SESN2, APOBEC3B, GLB1, ACAA1, MGAT1, ARG2, NAGK, HPD, PFKL, IMPA2, ACADVL, HK1, ADTRP, TST, ABHD1, CSAD, HNMT, APOE, PIPOX, DECR1, CPT1B, PCK2, MTHFS, MFSD2A, GALE, AKT1, PF…
bioplanet	bioplanet_Senescence and autophagy	2.92076e-05	0.000552868	0.57561	0.471121	1.90731	86	THBS1, ATG10, CXCL1, SLC39A4, CREG1, SERPINE1, FN1, CCL3, SLC39A1, SRC, IL1A, ATG7, MDM2, CEBPB, SPARC, LAMP2, IRF5, IL1B, MAP2K3, SH3GLB1, MAP1LC3A, CDKN1A, GSN, ATG3, CXCL14, LAMP1, GABARAP, IL6, COL10A1, IFI16, CXCL8, SERPINB2, CD44
GOBP	GOBP_PLASMA_MEMBRANE_ORGANIZATION	2.93545e-05	0.000554791	0.57561	0.454604	1.87831	95	CLU, CD9, S100A9, DYSF, UGCG, BAIAP2, MTSS2, CAVIN2, FLOT1, MYOF, PLSCR1, VMP1, MTSS1, ATP2A2, EPB41L3, SH3GLB1, A4GALT, FER1L5, CHMP2A, PRKCD, GSN, PLEC, FOLR2, SNX33, ABCA7, SYT11, NDRG1, ANO6, PLSCR3, AKT1, CHMP4B, CHMP6, CHMP5, SNX9, EHD2, BIN3, SOD1, PRX, BAIAP2L2, SERPINA5, ABCD1, STX2
HALLMARK	HALLMARK_OXIDATIVE_PHOSPHORYLATION	2.94518e-05	0.000555772	0.57561	0.392656	1.75693	171	NDUFS8, IDH1, NQO2, TCIRG1, COX6B1, LDHA, CS, MGST3, PRDX3, ATP6V1D, ACAA1, ATP6AP1, NDUFV2, NDUFB7, COX4I1, VDAC1, NDUFB2, ACADVL, ATP6V0E1, CASP7, PDK4, FDX1, NDUFS6, ATP5F1E, ATP5F1D, NDUFA8, POR, DECR1, NDUFS3, UQCRH, SDHC, VDAC2, MRPL15, SURF1, FXN, COX5A, HADHA, NDUFV1, ECI1, MDH2, ATP5MG, TIMM8B, SLC25A11, NDUFB3, NDUFB8, MRPL34, ATP5PO, ACAA2, COX8A, NDUFA9, COX17, HADHB, NDUFS7, OXA1L, A…
bioplanet	bioplanet_Huntington's disease	2.95305e-05	0.000556399	0.57561	0.437509	1.86524	120	NDUFS8, SOD2, CREB5, AP2A1, COX6B1, GNAQ, PLCB1, HIP1, APAF1, HTT, IFT57, GPX1, NDUFV2, CLTB, NDUFB7, COX4I1, POLR2G, RCOR1, VDAC1, NDUFB2, NDUFS6, NDUFA8, PLCB2, TGM2, CREB3, NDUFS3, UQCRH, DCTN2, SDHC, AP2M1, AP2S1, VDAC2, PLCB3, AP2A2, COX5A, NDUFV1, COX2, NDUFB3, NDUFB8, COX8A, NDUFA9, POLR2E, NDUFS7, ATP8, AP2B1, CASP9, CREB3L2, DCTN4, CLTC, SOD1, UQCRB, NDUFC2, BAX, TAF4, CLTA, NDUFA10, NDU…
GOBP	GOBP_POSITIVE_REGULATION_OF_NERVOUS_SYSTEM_DEVELOPMENT	3.00249e-05	0.000564476	0.57561	0.388528	1.73357	166	CX3CR1, CYFIP1, NRP1, SPINT1, HES1, IL1RAP, BAIAP2, TLR2, PLXNB2, LIF, TSPO, FN1, LYN, SS18L1, PRKCI, TNFRSF1B, NPTN, PLXNC1, SEMA4A, VEGFA, LRTM2, HIF1A, GFAP, EPHB2, XRCC2, IL1B, NOTCH1, SHTN1, TTBK1, CUX1, IL6, TNF, PARP6, DISC1, DBNL, LIMK1, TWF2, SERPINE2, PLXND1, LRRTM2, EGR2, NUMB, TGM2, DIXDC1
REACTOME	REACTOME_SLC_MEDIATED_TRANSMEMBRANE_TRANSPORT	3.00513e-05	0.000564476	0.57561	0.410382	1.80562	151	EMB, SLC50A1, SLC47A1, SLC31A1, SLC11A1, SLC1A3, SLC7A7, SLC39A4, SLC22A4, SLC22A15, RHAG, SLC39A1, SLC43A2, SLCO2B1, SLC16A3, SLC2A6, SLC6A6, SLCO4A1, SLC6A9, SLC36A4, SLC24A3, SLC8A1, SLC7A8, SLC15A3, SLC8B1, PDZD11, SLC1A2, SLC18A2, SLC2A14, SLC35A2, SLC9A8, SLC30A1, SRI, SLC1A5, SLC29A3, SLC22A18, SLCO3A1, SLC26A11, SLC2A8, SLC7A11, SLC36A1, SLC27A4, SLC7A9, SLC25A29, SLC9A1, SLC5A11, SLC7A5
WP	WP_SPINAL_CORD_INJURY	3.03751e-05	0.000569685	0.57561	0.501568	1.96454	72	CCR2, SELP, LGALS3, CXCL1, AIF1, CCL2, IL1R1, VCAN, MMP9, TNFSF13B, TLR4, C1QB, IL1A, GFAP, IL1B, VIM, ICAM1, RHOB, RTN4, IL6, TNF, FKBP1A, LTB4R, CXCL8, PTGS2, CHST11, MAPK3, PLA2G6, PLXNA2, RHOA, CDK4, PPP3CA, FOXO3, ANXA1, PRKCA, CCND1
GOBP	GOBP_GLYCOSPHINGOLIPID_METABOLIC_PROCESS	3.05603e-05	0.000572282	0.557332	0.585465	2.05858	41	UGCG, B4GALNT1, B4GALT5, NAGA, A4GALT, HEXB, PRKCD, GLB1, HEXA, GBA, ST8SIA4, GLTP, ST6GALNAC4, ST3GAL2, ST6GALNAC3, CERK, SUMF1, GLA, GM2A, B3GALT4, LARGE1, CPTP, BAX, B4GALT4, NEU1, TM9SF2
GOBP	GOBP_RETROGRADE_TRANS_SYNAPTIC_SIGNALING	3.06371e-05	0.000572844	0.557332	0.900422	1.99205	7	DAGLB, GUCY1A1, DAGLA, PLCB1, FARP1, FABP5
GOBP	GOBP_INTESTINAL_ABSORPTION	3.10846e-05	0.000580325	0.557332	0.694316	2.08655	21	VDR, SLC46A1, UGCG, LDLR, KCNQ1, CD36, SLC2A5, AKR1C1, LPCAT3
bioplanet	bioplanet_Signal transduction by L1	3.12265e-05	0.000582086	0.557332	0.641234	2.11611	31	NRP1, AP2A1, ITGAV, ITGA2B, ITGA9, PAK1, CSNK2A2, RPS6KA4, NCAM1, MAPK3, AP2M1, AP2S1, AP2A2, L1CAM, RPS6KA2, ITGB1, AP2B1, ITGA5, CLTC, MAP2K1, CLTA
GOBP	GOBP_NEGATIVE_REGULATION_OF_CALCIUM_ION_TRANSPORT	3.24884e-05	0.000604689	0.557332	0.609806	2.0436	34	HES1, FKBP1B, GEM, GPR35, YWHAE, CBARP, GSTO1, CALM3, SESTD1, TMBIM6, VDAC1, SLC30A1, FKBP1A, SRI, PTGS2
GOBP	GOBP_ZYMOGEN_ACTIVATION	3.25977e-05	0.000605803	0.557332	0.59017	2.08522	42	PLAU, THBS1, PYCARD, CTSL, ENO1, LGMN, SERPINE1, NLRC4, VSIR, CD5L, ANXA2, APAF1, FURIN, PGK1, CTSZ, SERPINE2, IFI16, RIPK2, BAD, CTSH, S100A10, CASP9, ASPH, PLGRKT
bioplanet	bioplanet_Ubiquitin-mediated proteolysis	3.27748e-05	0.000608172	0.557332	-0.371967	-1.84913	123	BIRC2, HERC4, CDC23, SKP2, SMURF2, RHOBTB1, FBXW8, HERC3, UBE2J1, ITCH, UBE2O, UBE2Z, NEDD4, UBE3C, PPIL2, PIAS1, BTRC, CUL3, MGRN1, CDC26, PIAS2, UBE4A, CUL1, DET1, CUL4B, BIRC3, TRIM32, UBE3B, UBA3, UBE2S, UBA2, MAP3K1, FZR1, UBE2D2, RCHY1, ANAPC1, UBE2Q1, TRAF6, ANAPC4, PIAS3, KLHL13, CBLB, SIAH1, ANAPC10, SOCS1, KLHL9, UBE3A, PRPF19
GOBP	GOBP_REGULATION_OF_DNA_BINDING_TRANSCRIPTION_FACTOR_ACTIVITY	3.29145e-05	0.000609839	0.557332	0.348389	1.65118	307	CLU, CX3CR1, S100A12, S100A9, HCK, S100A8, HMOX1, SPHK1, STING1, NOD2, ANXA3, PYCARD, CARD9, SPI1, HES1, IL1RAP, IRAK3, BCL3, FOSL1, CLEC7A, TLR2, IL18, TRIB1, FLOT1, NFAM1, IL10, TNFRSF11A, ACOD1, PRKCI, TLR4, CD36, NLRC4, VEGFA, TLR6, CTH, STK3, WFS1, KLF4, CMKLR1, TCF7L2, TRIM5, SGK1, ARRB1, APP, BHLHE40, IL1B, NLRP3, CAPN3, CYP1B1, NLRP12, MYD88, GAS6, TICAM1, PRDX3, PPP2CB, ADAM8, MTURN, SYK…
GOBP	GOBP_MRNA_MODIFICATION	3.35244e-05	0.000620201	0.557332	-0.642058	-2.16911	25	TRMT61A, VIRMA, NSUN2, METTL14, CBLL1, APOBEC2, METTL8, CMTR2, TRMT10C, PCIF1, CMTR1, METTL16, TRMT61B, WTAP, PUS7
GOBP	GOBP_CELL_JUNCTION_ASSEMBLY	3.39788e-05	0.000627659	0.557332	0.36598	1.70153	232	NRG1, CD9, NRP1, THBS1, CLDN5, VCL, IL1RAP, TLR2, LAMC1, PLXNB2, TEK, FLOT1, FN1, SRC, SDCBP, NPTN, ITGA2, ABI3, RAB13, ZNF703, VMP1, SEMA4A, VEGFA, LRTM2, ARHGAP6, PRKACA, CTNNA1, FARP1, CTTN, EPB41L3, APP, EPHB2, IL1B, CORO1C, GJB2, GJB6, PLEC, TLN1, CTNND1, ESAM, VPS35, ACTG1, ITGB1BP1, TNF, RAMP2, CDK5, DBNL, PTK2, PARD3, MICALL2, OCEL1, PLXND1, LRRTM2, SNAI1, AFDN, WDR1, PTPRJ, CLDN4, OPHN1,…
WP	WP_SEROTONIN_TRANSPORTER_ACTIVITY	3.41818e-05	0.000630459	0.557332	0.898863	1.9886	7	MAOA, IL1R1, TGFB1I1, STX1A, IL1B, PPP2CB, SCAMP2
REACTOME	REACTOME_TRNA_PROCESSING_IN_THE_NUCLEUS	3.44601e-05	0.000634635	0.557332	-0.495747	-2.07548	52	NUP107, NUP160, NUP43, XPOT, RPP38, CLP1, RAE1, NUP54, NUP35, NUP42, RTRAF, TSEN54, POP1, RPP21, NUP88, DDX1, NUP155, RPP14, RANBP2, NUP62, POP4, CPSF4, RAN, NUP133, NUP210
bioplanet	bioplanet_TSH regulation of gene expression	3.48914e-05	0.000641615	0.557332	0.493289	1.9185	70	ADM, PPIC, S100A4, HES1, CCL2, STX11, NOTCH2, CAMKK2, NRGN, VMP1, VEGFA, ATP2A2, PFKFB4, CYBA, CYP1B1, NOTCH1, SORD, ICAM1, CXCL14, TNK2, RGS2, PHLDB1, THEMIS2, CTTNBP2NL, CXCL8, TTF2, PDIA4, PTGS2, TG, CKB
bioplanet	bioplanet_Vitamin B12 metabolism	3.51028e-05	0.000644534	0.557332	0.631274	2.07164	30	SOD2, LDLR, CCL2, SERPINE1, CTH, MTHFR, IL1B, ICAM1, IL6, TNF, INSR, APOE, ABCA1, MPO, CUBN, SOD1
REACTOME	REACTOME_MITOTIC_PROMETAPHASE	3.52838e-05	0.000645626	0.557332	-0.330761	-1.7077	177	CEP76, TUBA4A, ODF2, STAG1, PPP2R5A, NUP107, TUBB2B, MIS12, NUP160, AHCTF1, CEP135, WAPL, NUP43, STAG2, TUBGCP3, DYNLL2, NEK9, CCP110, RAD21, TUBGCP5, BUB3, NUMA1, CEP57, ZW10, NEDD1, CEP70, CENPJ, PCM1, DSN1, PLK4, PDS5B, PDS5A, HAUS7, CKAP5, TUBGCP6, HAUS5, NDEL1, PPP1CC, XPO1, CEP250, PPP2R5E, CENPP, CENPC
GOBP	GOBP_CELLULAR_OXIDANT_DETOXIFICATION	3.53026e-05	0.000645626	0.557332	0.514012	1.95895	63	S100A9, PTGES, SOD2, ALOX5AP, MGST1, NXN, MGST2, CD36, SRXN1, GSTP1, GSTO1, PRDX5, TXNDC17, MGST3, PRDX3, SESN2, GPX1, NFE2L2, GLRX, PRDX1, TXNRD1, APOE, PTGS2, GSR, CAT, PRXL2B, MPO, PARK7, GSTK1, NOS3, SELENOF, SOD1
GOBP	GOBP_REGULATION_OF_RESPONSE_TO_BIOTIC_STIMULUS	3.53205e-05	0.000645626	0.557332	0.356972	1.6697	260	HCK, FGR, EMILIN2, TREM2, FCGR2B, NECTIN2, STING1, NOD2, HTRA1, FPR2, DAPK1, PYCARD, CARD9, SPI1, GRN, FCN1, FGL2, IRAK3, LY96, CLEC7A, VSIG4, COCH, TRIB1, LYN, CD180, SRC, ACOD1, PTPN1, PLSCR1, TYROBP, TLR8, TLR4, CD36, NLRC4, SCIMP, SASH1, NR1H3, TREX1, BMP6, TRIM5, CXCL6, CASP6, NCF1, RNF135, IL1B, CYBA, LILRA2, PTPN2, PAK1, ADAM8, CADM1, SYK, LAMP1, CFH, NFE2L2, ARG2, IFI35, NCR1, CD274, SAMH…
GOBP	GOBP_REGULATION_OF_ACUTE_INFLAMMATORY_RESPONSE	3.55884e-05	0.000649554	0.557332	0.652926	2.10768	27	PTGES, ALOX5AP, FCGR2B, OSM, TNFRSF11A, GSTP1, IL1B, NLRP3, FUT7, C3, ADAM8, IL6, TNF, BTK, PTGS2, RHBDD3
GOBP	GOBP_RECEPTOR_METABOLIC_PROCESS	3.58136e-05	0.000652693	0.557332	0.432104	1.84137	121	ADM, NRG1, CD9, RAB31, BVES, LILRB4, LDLR, LRP1, LGMN, FLOT1, SDCBP, PTPN1, FCER1G, CD36, DNM1, VEGFA, ARRB1, ANXA2, SH3GLB1, FURIN, CAPN1, EHD3, SYK, CXCR1, ANKRD13D, PICALM, LAMTOR1, RAMP2, CDK5, PSEN1, INSR, GRK3, ITGB2, LRRTM2, CXCL8, NUMB, APOE, OPHN1, AP2M1, SNX1, RAMP1, ARRB2, LMTK2, LMBRD1, HTR2B, AHI1, CD81, MVB12A
WP	WP_NUCLEOTIDEBINDING_OLIGOMERIZATION_DOMAIN_NOD_PATHWAY	3.68588e-05	0.000669899	0.557332	0.623056	2.09264	33	MEFV, NOD2, PYCARD, CARD9, NAIP, CASP1, IL18, NLRC4, IL1B, NLRP3, NLRP12, CARD6, PRDM1, CASP7, AIM2, RIPK2, NLRP1, CASP5, AAMP, CASP9, NLRP2, IKBKG
GOBP	GOBP_ACTIN_FILAMENT_POLYMERIZATION	3.68671e-05	0.000669899	0.557332	0.434629	1.85296	120	HCK, CYFIP1, MSRB1, PYCARD, PSTPIP2, CDC42EP2, AIF1, BAIAP2, SCIN, TMSB10, SSH3, CYRIA, CAPG, ANG, CDC42EP3, ARHGAP6, CAPZB, WASHC3, CTTN, GAS7, ARPC3, ARHGAP18, PRKCD, GSN, ESAM, NCKAP1, HCLS1, CATIP, COTL1, DBNL, MICALL2, TWF2, MSRB2, EPS8, MTPN, RDX, FLII, ARPC2, VASP, CAPZA2, RHOA, NCKAP1L, TMOD3, VIL1, SPTBN2, SNX9, WAS, GRB2, NCK2, DMTN, SSH1, PLEKHG2, PAK3, DIAPH1, BAIAP2L2, ABITRAM
REACTOME	REACTOME_MET_PROMOTES_CELL_MOTILITY	3.71693e-05	0.000674388	0.557332	0.644645	2.095	29	LAMC1, HGF, FN1, SRC, ITGA2, TNS3, DOCK7, LAMB2, PTK2, LAMB3, RAP1A, MET, GAB1, CRK, ITGB1, GRB2, LAMA3
PID	PID_PDGFRB_PATHWAY	3.88615e-05	0.000704049	0.557332	0.432045	1.8347	118	HCK, FGR, GRB10, SPHK1, DOCK4, BAIAP2, LRP1, ITGAV, LYN, SRC, PTPN1, YWHAE, YES1, IQGAP1, CTTN, BRK1, ARPC3, RAB4A, PTPN2, PRKCD, PAK1, YWHAB, NCKAP1, EPS8, STAT3, PLA2G4A, AFDN, PTPRJ, MAPK3, PIK3CB, SFN, RAP1A, PIN1, SOS1, ARHGDIA, ARPC2, GAB1, RHOA, CRK, EIF2AK2, TAGLN, SHC1, PPP2R1A, CBL, MAP2K1, GRB2, SLA, NCK2, ARAP1, MAP2K4, YWHAG, ACTN4, PRKCA, ACTR2, ACTR3
bioplanet	bioplanet_Class A GPCRs (rhodopsin-like)	3.95157e-05	0.000714843	0.557332	0.464733	1.88923	87	CX3CR1, PTAFR, P2RY2, HTR7, FPR3, FPR1, FPR2, GPR27, PTGER2, C3AR1, P2RY13, P2RY12, CCR1, C5AR2, GPR35, ADORA2B, CMKLR1, CCRL2, P2RY1, ADRB2, HRH2, PTGIR, CXCR1, P2RY6, LTB4R, CCR5, GPR22, CYSLTR2, SUCNR1, F2RL2
GOBP	GOBP_CALCIUM_ION_TRANSPORT_INTO_CYTOSOL	3.99133e-05	0.000720538	0.557332	0.458674	1.90327	97	P2RX1, NOL3, FKBP1B, CCL3, LYN, TPCN2, GRIN2C, PRKACA, SLC8A1, GP1BA, SLC8B1, CYBA, CAPN3, GSTO1, GP9, ERO1A, TMEM38B, CALM3, TRPM2, TMBIM6, HTT, CHD7, JSRP1, MCOLN1, RYR1, P2RY6, FKBP1A, CCR5, PTPN6, SRI, TMEM38A
GOBP	GOBP_REGULATION_OF_DNA_REPAIR	3.99482e-05	0.000720538	0.557332	-0.360714	-1.8074	132	PPP4R3B, PARG, SIRT1, WDR48, RPA2, TERF2, ING3, RIF1, KAT7, POT1, WRNIP1, BRD8, UIMC1, VPS72, PCNA, TFIP11, AXIN2, EPC1, SHLD3, DHX9, USP1, FANCB, CYREN, ARID2, SETD2, TERF2IP, CCDC117, MAGEF1, HDGFL2, MMS19, SMCHD1, SLF2, YEATS4, CEBPG, FBH1, WRAP53, ERCC6, TIGAR, POLQ, POGZ, TRIM28, SHLD1, NSD2, CDK9, XRCC1
bioplanet	bioplanet_Transport of mature transcript to cytoplasm	4.01187e-05	0.00072255	0.557332	-0.519244	-2.10894	46	NUP107, NUP160, NUP43, SRSF6, SRSF2, RAE1, NUP54, SRSF5, NUP35, NXF1, SRRM1, NFX1, RBM8A, NUP88, NUP155, RANBP2, NUP62, NUP133, NUP210, UPF3B, ALYREF
bioplanet	bioplanet_Developmental biology	4.03176e-05	0.000725066	0.557332	0.347538	1.64016	293	MYH14, TREM2, NRP1, COL9A2, ALCAM, MAPK11, HES1, FES, PCSK6, AP2A1, ITGAV, LAMC1, SRC, LPL, SDCBP, ITGA2B, TYROBP, SPAG9, CD36, DNM1, ITGA2, CEBPD, PLXNC1, CEBPA, SEMA4A, PITPNA, RXRA, KLF4, MYL12B, ITGA9, CTNNA1, CEBPB, EPHB2, CFL1, MYL9, FURIN, NOTCH1, RHOB, PAK1, MYH10, SCN1B, RRAS, TLN1, NRP2, YWHAB, RHOG, TNF, CAP1, CDK5, LIMK2, MED8, LIMK1, PTK2, CSNK2A2, PLXND1, EGR2, NCOR1, ST8SIA4, RPS6K…
GOBP	GOBP_ORGANIC_ACID_TRANSMEMBRANE_TRANSPORT	4.0509e-05	0.00072744	0.557332	0.446432	1.85327	98	EMB, AQP9, SLC47A1, SLC46A1, THBS1, SLC1A3, SLC7A7, SLC22A4, ACSL1, CD36, SLC43A2, SLC16A3, SLC6A6, SLC6A9, SLC36A4, GFAP, SLC7A8, ABCC1, SLC1A2, FOLR2, SLC38A7, TNF, RGS2, PSEN1, SLC1A5, CPT1B, SLC38A10, AKT1, SLC7A11, SLC36A1, SLC66A1, SLC7A9, SLC25A29, CLN8, SLC25A11, ACSL5, SLC7A5, ITGB1, SLC23A1, CPT1A, ABCB1
GOBP	GOBP_NEGATIVE_REGULATION_OF_WOUND_HEALING	4.08182e-05	0.000731919	0.557332	0.580348	2.04059	41	ALOX5, CD9, TFPI, PLAU, THBS1, SERPINE1, THBD, ALOX12, GP1BA, PRKCD, CD109, TNF, PROS1, SERPINE2, ADTRP, SERPING1, APOE, SERPINB2, EDN1, CLASP2, CRK, FGF2, ADAMTS18, NOS3, CLDN3, SH2B3, MMRN1
WP	WP_PI3KAKT_SIGNALING_PATHWAY	4.1067e-05	0.000735304	0.557332	0.375371	1.70732	201	VWF, ITGB5, CREB5, THBS1, OSM, COL9A2, GNB4, ITGAV, TLR2, LAMC1, CSF3R, TEK, HGF, FN1, ITGA2B, TLR4, ITGA2, VEGFA, COMP, CSF1R, MYB, CDK6, EIF4EBP1, ITGA9, MDM2, SGK1, PIK3AP1, GNG11, IFNAR2, CDKN1A, THEM4, BCL2L1, PPP2CB, LAMB2, SYK, GNB1, IL6, SPP1, GNG5, PKN3, INSR, G6PC3, PTK2, GNB2, CREB3, LAMB3, PCK2, MAPK3, PIK3CB, AKT1, BAD, IL2RA, SOS1, MET, TNN, IL7, GYS1, EFNA1, ITGB1, CASP9, ITGA5, CR…
GOBP	GOBP_COLLAGEN_METABOLIC_PROCESS	4.14528e-05	0.000741128	0.557332	0.534819	2.02702	57	ENG, CTSB, MMP1, MMP19, CTSL, CTSS, MMP9, ITGA2, VSIR, HIF1A, MMP25, MRC2, CST3, PLOD3, ADAM15, FURIN, VIM, PEPD, MMP2, IL6, TRAM2
GOBP	GOBP_MEMBRANE_LIPID_CATABOLIC_PROCESS	4.15165e-05	0.000741185	0.557332	0.643103	2.08999	29	SPHK1, SMPDL3A, ASAH1, FUCA1, MGST2, ACER2, CYP1B1, PPT1, NAGA, HEXB, PRKCD, ENPP2, HEXA, GBA, SMPD2, SMPD3, GLA, GM2A, SMPD4, NEU1, ACER3
GOBP	GOBP_ENZYME_LINKED_RECEPTOR_PROTEIN_SIGNALING_PATHWAY	4.16276e-05	0.000741519	0.557332	0.299059	1.47986	585	NRG1, ENG, NIBAN2, HCK, CYFIP1, FGR, RASGRP4, ITGB5, GRB10, NRP1, PLAUR, THBS1, PTPN18, MVP, MERTK, HTRA1, TNFAIP6, SPI1, GPRC5A, ZFYVE28, CLDN5, HES1, ZYX, FES, BAIAP2, PCSK6, HFE, IGFBP4, LRP1, LGMN, DAB2, RHBDF2, NOTCH2, LIF, TEK, HGF, SH2B2, SPRED1, PTPRE, LYN, GFRA3, SRC, MMP9, SDCBP, PTPN1, SPRY1, HBEGF, NPTN, PXN, SOCS2, ZNF703, MTSS1, VEGFA, COMP, TGFB1I1, PLCB1, CSF1R, GAB2, SORT1, HIF1A…
bioplanet	bioplanet_Prostaglandin biosynthesis and regulation	4.16564e-05	0.000741519	0.557332	0.727576	2.13627	19	TBXAS1, ANXA3, PTGER2, ANXA5, S100A6, ANXA2, PTGIR, PTGDS, ANXA4, PLA2G4A, HSD11B1, PTGS2, EDN1, S100A10
GOBP	GOBP_POSITIVE_REGULATION_OF_ION_TRANSMEMBRANE_TRANSPORT	4.21939e-05	0.000746947	0.557332	0.46906	1.93095	92	PTAFR, CCR2, TREM2, IFNGR2, CCL2, KCNMB1, P2RX1, CTSS, KCNQ1, G6PD, VMP1, STAC3, SLC6A9, EPHB2, CAPN3, GSTO1, ADRB2, ATP1B3, EHD3, CALM3, KCNJ2, HTT, RNF207, ANTKMT, CDK5, PSEN1, GLRX, PDZK1, P2RY6, CNKSR3, SRI, ANO6, CEMIP, EDN1, SLC9A1
GOBP	GOBP_REGULATION_OF_MEMBRANE_POTENTIAL	4.21031e-05	0.000746947	0.557332	0.370209	1.71348	221	MYH14, TRPM4, SOD2, TREM2, BVES, KCNK13, BAIAP2, P2RX1, FKBP1B, TSPO, KCNQ1, SRC, CLIC1, UNC13B, CD36, GNAQ, ATP2A2, GPR35, YWHAE, GRIN2C, APP, SLC8A1, PID1, STX1A, KCNK6, SLC8B1, GNA15, KCNH3, RIMS3, KCNH4, PRELID1, ADRB2, ATP1B3, EHD3, PRDX3, BCL2L1, SCN1B, CALM3, KCNJ2, HEBP2, TNF, RNF207, CDK5, PSEN1, GBA, GLRX, GNA11, SRI, WDR1, PIEZO1, ATP1A1, KCNE3, AKT1, BAD, EDN1, ARRB2, P2RX4, KCNK5, SC…
KEGG	KEGG_ECM_RECEPTOR_INTERACTION	4.22052e-05	0.000746947	0.557332	0.538859	1.9733	51	VWF, ITGB5, THBS1, ITGAV, LAMC1, FN1, SDC3, ITGA2B, CD36, ITGA2, COMP, ITGA9, GP1BA, GP9, LAMB2, SDC2, SPP1, LAMB3, CD44, GP6, TNN, ITGB1, ITGA5
bioplanet	bioplanet_ECM-receptor interaction	4.22052e-05	0.000746947	0.557332	0.538859	1.9733	51	VWF, ITGB5, THBS1, ITGAV, LAMC1, FN1, SDC3, ITGA2B, CD36, ITGA2, COMP, ITGA9, GP1BA, GP9, LAMB2, SDC2, SPP1, LAMB3, CD44, GP6, TNN, ITGB1, ITGA5
GOBP	GOBP_NEGATIVE_REGULATION_OF_CELL_CYCLE_PROCESS	4.28899e-05	0.000757968	0.557332	-0.302136	-1.60476	232	SMARCA5, XPC, WAC, SYF2, BTN2A2, USP47, ZFP36L2, JADE1, RGCC, MDM1, RBL2, PLK2, WAPL, RPA2, TERF2, NSUN2, APBB1, MRE11, CCP110, RAD21, BUB3, ZW10, CDKN1B, APBB2, BLM, EME1, ETAA1, UIMC1, CDC5L, CDC73, RBM14, CTDSP2, NPM1, FBXO7, CCAR2, PTTG1, PCID2, SDE2, TERF1, HINFP, ZNF830, RFWD3, ZNF207, MAD2L1BP, CCNG1, TP53, FOXN3, ATM, CRY1, APC, GIGYF2, PLK3, RAD9A, NABP1, MYO16, TRIAP1, MSH2, FZR1, CDK5R…
GOBP	GOBP_NEGATIVE_REGULATION_OF_SECRETION	4.40722e-05	0.000777742	0.557332	0.464362	1.9105	93	NRG1, CCR2, HMOX1, FCGR2B, OSM, TNFRSF1A, CD300A, SPI1, RHBDF2, FKBP1B, LIF, TIFAB, FRMD4A, TNFRSF1B, NR1H3, RAB11FIP5, IL1B, P2RY1, CBARP, PIM3, FFAR4, NOTCH1, KLF7, RAB11FIP1, TNF, ERP29, PFKL, RABGEF1, SLC30A1, ADTRP, SYT11, APOE, RAP1A, EDN1, PNKD
GOBP	GOBP_AMIDE_TRANSPORT	4.43919e-05	0.000781132	0.557332	0.383882	1.71741	174	ALOX5, TRPM4, AQP3, GLUL, AQP9, SLC47A1, S100A8, ABCC4, MGST1, SLC46A1, PSAP, ICA1, HFE, FKBP1B, GPR27, IL1RN, TCIRG1, BRSK2, HIF1A, TCF7L2, RAB11FIP5, STX1A, SLC15A3, IL1B, SLC8B1, PIM3, FFAR4, ABCC1, TRPM2, KLF7, FOLR2, CHD7, IL6, TNF, PFKL, ACSL4, SRI, MAFA, PCK2, GLTP, SMPD3, SLC7A11, ABCA1, BAD, EDN1, SIDT2, PLA2G6, UPK3A
GOBP	GOBP_CELLULAR_MONOVALENT_INORGANIC_CATION_HOMEOSTASIS	4.43547e-05	0.000781132	0.557332	0.501322	1.97046	74	DMXL2, RAB20, SLC11A1, ATP6V0D2, SLC1A3, GRN, MAFG, TCIRG1, ATP6V0D1, IL1A, ATP6V0A1, SLC8A1, RAB39A, PPT1, LACC1, ATP1B3, KCNJ2, ATP6AP1, SLC9A8, ATP6V0E1, TM9SF4, ATP6AP2, ATP1A1, TMEM165, MAPK3, SLC9A1, ATP6V1H, KCNMA1, ATP5F1B
bioplanet	bioplanet_Folate metabolism	4.54731e-05	0.000799008	0.557332	0.599783	2.08828	39	SOD2, SLC46A1, LDLR, CCL2, MTHFD2, SERPINE1, CTH, MTHFR, IL1B, ICAM1, FOLR2, IL6, TNF, INSR, MTHFS, ABCA1, CAT, MPO, MTHFD1
GOBP	GOBP_CELL_MORPHOGENESIS_INVOLVED_IN_DIFFERENTIATION	4.60967e-05	0.000808805	0.557332	0.318414	1.55445	446	EMB, MYO7A, NIBAN2, CYFIP1, NRP1, SLC1A3, BVES, MERTK, ALCAM, SPI1, VCL, HES1, BAIAP2, ITGAV, DAB2, MPIG6B, LAMC1, PLXNB2, NOTCH2, TEK, DOCK5, FLOT1, FN1, B4GALT5, GFRA3, SRC, SS18L1, BRSK2, NPTN, PXN, ABI3, PLXNC1, SEMA4A, VEGFA, LRTM2, OLFM1, CSF1R, APLP2, LYPLA2, FARP1, S100A6, CTTN, CLEC1B, APP, EPHB2, CDH23, DOCK7, CORO1C, PLOD3, MEGF9, RAB10, SEMA6B, CFL1, SEMA3C, FERMT3, NOTCH1, PGRMC1, SH…
bioplanet	bioplanet_Immune system	4.63809e-05	0.000811552	0.557332	0.287897	1.44015	724	TLR5, S100A12, PTAFR, FCGR1A, CCR2, RNF144B, HCK, TNIP2, ITGB5, MEFV, LGALS3, FCGR2B, NCF2, UBE2M, CTSD, NOD2, CTSB, CASP4, PYCARD, CARD9, LILRB4, IFNGR2, MAPK11, IL1RAP, IRAK3, CTSC, CTSL, LY96, AP2A1, LILRA1, ITGAV, LGMN, IFI30, DUSP6, TLR2, CASP1, IL18, CD14, NCF4, CTSS, IL1R1, HGF, CYBB, LYN, CD180, SRC, IL1RN, PTPN1, PDCD1LG2, TYROBP, CSF2RB, TLR8, TLR4, CD36, NLRC4, DNM1, SOCS2, CTSA, C1QB,…
GOBP	GOBP_CARBOHYDRATE_DERIVATIVE_CATABOLIC_PROCESS	4.63857e-05	0.000811552	0.557332	0.435604	1.84726	117	UPP1, DPYD, ALDH1A1, CTSL, AOAH, FUCA1, RENBP, NCCRP1, NUDT1, APOBEC3A, GNPDA1, NPL, GNS, MANBA, FBXO6, CHIT1, CST3, SGSH, CDA, NAGA, HEXB, PDE8A, PRKCD, APOBEC3B, GLB1, MGAT1, HEXA, NAGK, NUDT16, GBA, SAMHD1, CD44, CEMIP, HYAL3, CTBS, NUDT9, FUCA2, EDEM2, DERA, ADA2, PDE4A, GLA, MAN1A1, AMPD3, GM2A, NAGLU, FGF2, PDE5A, PNP, ABCD1, HINT1, FBXO27, NEU1, GSK3A, APOBEC3D, APOBEC3H
GOBP	GOBP_RESPONSE_TO_VITAMIN	4.66089e-05	0.000814292	0.557332	0.554434	2.02153	48	AQP3, SOD2, VDR, FES, FKBP1B, TSPO, ITGA2, IL1A, RXRA, KYNU, MTHFR, GAS6, FOLR2, GPX1, MN1, SPP1, ALAD, DCPS, CDKN2D, PTGS2, KANK2
GOBP	GOBP_POSITIVE_REGULATION_OF_CALCIUM_ION_TRANSPORT	4.66857e-05	0.000814473	0.557332	0.496428	1.92943	69	LGALS3, LILRA5, CCL2, P2RX1, TSPO, CCL3, G6PD, CCR1, VMP1, STAC3, MYLK, WFS1, CAPN3, LILRA2, GSTO1, EHD3, CALM3, HTT, CDK5, P2RY6, SRI, CEMIP, ARRB2, P2RX4, SLC9A1
GOBP	GOBP_POSITIVE_REGULATION_OF_NEUROBLAST_PROLIFERATION	4.69026e-05	0.000817092	0.557332	0.77397	2.09673	13	CX3CR1, VEGFA, HIF1A, NOTCH1, DISC1
GOBP	GOBP_CELL_CYCLE_CHECKPOINT_SIGNALING	4.75133e-05	0.000826555	0.557332	-0.345066	-1.74597	149	XPC, WAC, SYF2, PLK2, RPA2, NSUN2, MRE11, BUB3, ZW10, CDKN1B, BLM, EME1, ETAA1, UIMC1, CDC5L, CCAR2, PCID2, SDE2, HINFP, ZNF830, RFWD3, ZNF207, MAD2L1BP, CCNG1, TP53, FOXN3, ATM, CRY1, APC, GIGYF2, PLK3, RAD9A, NABP1, TRIAP1, MSH2, FZR1, CDK5RAP2, BRSK1, ATF2, INTS7, RAD17, ERCC6, TOPBP1, FBXO31, MDC1, MAD2L1, HUS1B, LCMT1, USP28, NAE1, BRIP1, RINT1, RAD1, CDC14B, TAOK2, PRPF19, PSMG2
bioplanet	bioplanet_Integration of energy metabolism	4.83505e-05	0.000839476	0.557332	0.477871	1.8876	76	GNB4, PRKAR2B, MARCKS, GNAQ, PLCB1, TCF7L2, PRKACA, TKT, IQGAP1, STX1A, GNG11, TALDO1, ADCY4, GNA15, FFAR4, DPP4, PPP2CB, GNB1, GNG5, GNA11, MLXIPL, SEC11C, PLCB2, GNB2, FASN, RAP1A, PLCB3, GNAI1, ADCY7, MLX
GOBP	GOBP_NEGATIVE_REGULATION_OF_CELLULAR_MACROMOLECULE_BIOSYNTHETIC_PROCESS	4.83931e-05	0.000839476	0.557332	-0.309167	-1.62696	219	ITM2C, CNOT8, TSPYL2, PAIP2B, PDE12, HNRNPU, CNOT6L, ZFP36L2, RNF139, IREB2, GZMB, CSDE1, LSM14A, WAPL, TERF2, TSC1, TOB1, ATF4, ROCK2, PUM1, POT1, EIF4A3, CNOT2, BLM, GSK3B, METTL14, CNOT1, HNRNPD, TNRC6C, POLR2D, STN1, ERCC4, CNOT7, AGO3, CAPRIN2, SMARCAL1, DHX9, YTHDF2, TERF1, ZNF830, DDX3X, RC3H2, PDS5A, EXOSC9, EIF4ENIF1, UNK, NCL, TNRC6B, BTG2, CNOT6, AGO1, TP53, PCIF1, CELF1, PAIP2, NAT10,…
GOBP	GOBP_PEPTIDYL_TYROSINE_MODIFICATION	4.84906e-05	0.000839979	0.557332	0.35651	1.66204	249	NRG1, FCGR1A, HCK, FGR, AATK, TREM2, LILRA5, NRP1, OSM, MVP, MERTK, NOD2, TNFRSF1A, LILRB4, CD300A, GPRC5A, ZFYVE28, HES1, FES, CLEC7A, IL18, LIF, TEK, HGF, CAMKK2, LYN, SRC, PTPN1, HBEGF, CD36, ABI3, VEGFA, CSF1R, BMP6, YES1, BMX, NCF1, APP, EPHB2, MAP2K3, GPRC5B, GAS6, PTPN2, PRKCD, ENPP2, TNK2, SYK, TTBK1, VPS25, HCLS1, EHD4, IL6, TNF, ADAM17, DDR1, PSEN1, INSR, ITGB2, PTK2, ACVR1, EREG, PTPN6…
GOBP	GOBP_GLIAL_CELL_FATE_COMMITMENT	4.89461e-05	0.000846171	0.557332	0.982394	1.63071	3	NRG1, PAX6
bioplanet	bioplanet_Glycosphingolipid metabolism	4.89863e-05	0.000846171	0.557332	0.647202	2.08921	27	PSAP, UGCG, ASAH1, CTSA, ARSB, HEXB, ARSD, GLB1, HEXA, GBA, SMPD2, ARSA, SMPD3, CERK, SUMF1, GLA, GM2A, SMPD4, NEU1
GOBP	GOBP_LONG_CHAIN_FATTY_ACID_METABOLIC_PROCESS	4.9119e-05	0.000847269	0.557332	0.523253	1.99564	60	ALOX5, TBXAS1, DAGLB, ACSL1, DAGLA, CBR1, ALOX12, GSTP1, CYP1B1, ACOT8, PTGDS, PAM, MGLL, PTGES2, ACAA1, GPX1, QKI, ACSL4, ADTRP, PLA2G4A, CYP2J2, PTGS2, ACSF2, FADS2, SLC27A4, FADS1, ACSL5, SCP2, CPT1A, PLA2G4C, CPT2, ACAD9, ABCD1
GOBP	GOBP_ACTION_POTENTIAL	4.93174e-05	0.000849494	0.557332	0.486581	1.90571	71	MYH14, TRPM4, P2RX1, FKBP1B, KCNQ1, CD36, GNAQ, ATP2A2, GPR35, YWHAE, SLC8A1, GNA15, SCN1B, CALM3, KCNJ2, TNF, RNF207, GBA, GNA11, SRI, ATP1A1, KCNE3, P2RX4, SCN3B, SLC9A1, KCNAB2
GOBP	GOBP_CYTOSOLIC_CALCIUM_ION_TRANSPORT	4.99645e-05	0.000859432	0.557332	0.436519	1.84686	114	P2RX1, NOL3, FKBP1B, CCL3, LYN, TPCN2, ATP2A2, YWHAE, GRIN2C, PRKACA, SLC8A1, GP1BA, SLC8B1, CYBA, CAPN3, GSTO1, GP9, ERO1A, TMEM38B, CALM3, TRPM2, TMBIM6, HTT, CHD7, JSRP1, MCOLN1, VDAC1, RYR1, P2RY6, FKBP1A, CCR5, PTPN6, SRI, MICU3, TMEM38A
GOBP	GOBP_SEQUESTERING_OF_CALCIUM_ION	5.01065e-05	0.000860665	0.557332	0.471664	1.89649	84	NOL3, FKBP1B, CCL3, LYN, TPCN2, PRKACA, SLC8A1, GP1BA, SLC8B1, CYBA, CAPN3, GSTO1, GP9, ERO1A, TMEM38B, CALM3, TRPM2, HTT, CHD7, JSRP1, PSEN1, MCOLN1, RYR1, P2RY6, FKBP1A, CCR5, PTPN6, SRI, TMEM38A, CALR, CEMIP
GOBP	GOBP_CELLULAR_RESPONSE_TO_TOXIC_SUBSTANCE	5.10384e-05	0.000875444	0.557332	0.485088	1.91669	77	S100A9, PTGES, SOD2, ALOX5AP, MGST1, ALDH1A1, NXN, MGST2, CD36, SRXN1, MTARC2, GSTP1, GSTO1, PRDX5, TXNDC17, MGST3, PRDX3, SESN2, GPX1, NFE2L2, TNF, RDH12, GLRX, PRDX1, TXNRD1, APOE, PTGS2, GSR, AKR1A1, CAT, ESD, PRXL2B, MPO, PARK7, GSTK1, NOS3, SELENOF, SOD1
GOBP	GOBP_POSITIVE_REGULATION_OF_CELL_DEVELOPMENT	5.14199e-05	0.000880754	0.557332	0.373863	1.70046	201	CX3CR1, NIBAN2, CYFIP1, NRP1, SPINT1, CLDN5, HES1, BAIAP2, CLEC7A, DAB2, TLR2, PLXNB2, LIF, DOCK5, TSPO, TRIB1, FN1, LYN, SS18L1, TYROBP, PRKCI, TNFRSF1B, NPTN, PLXNC1, VEGFA, HIF1A, GFAP, EPHB2, XRCC2, IL1B, NOTCH1, SHTN1, CIB1, TTBK1, CUX1, IL6, TNF, PARP6, DISC1, DBNL, LIMK1, TWF2, SERPINE2, PLXND1, EGR2, ILK, SIRT2, NUMB, TGM2, DIXDC1, CALR, P4HB, BAD, LIMS2, S100A10, GDI1, ARPC2, PLXNA2, L1C…
REACTOME	REACTOME_FORMYL_PEPTIDE_RECEPTORS_BIND_FORMYL_PEPTIDES_AND_MANY_OTHER_LIGANDS	5.24168e-05	0.000895326	0.557332	0.892371	1.97424	7	CCL23, FPR3, FPR1, FPR2, HEBP1, APP
bioplanet	bioplanet_Formyl peptide interaction with formyl peptide receptors	5.24168e-05	0.000895326	0.557332	0.892371	1.97424	7	CCL23, FPR3, FPR1, FPR2, HEBP1, APP
REACTOME	REACTOME_INTEGRATION_OF_ENERGY_METABOLISM	5.24956e-05	0.000895424	0.557332	0.487605	1.89639	70	GNB4, PRKAR2B, MARCKS, CD36, GNAQ, PLCB1, PRKACA, TKT, IQGAP1, STX1A, GNG11, TALDO1, ADCY4, GNA15, PPP2CB, GNB1, GNG5, GNA11, ACSL4, MLXIPL, CYSLTR2, PLCB2, GNB2, FASN, RAP1A, PLCB3, GNAI1, ADCY7, MLX
KEGG	KEGG_EPITHELIAL_CELL_SIGNALING_IN_HELICOBACTER_PYLORI_INFECTION	5.50066e-05	0.000935648	0.557332	0.529312	1.96467	53	ATP6V0D2, CXCL1, MAPK11, LYN, ATP6V1A, SRC, TCIRG1, HBEGF, ATP6V0D1, ATP6V0A1, PAK1, ATP6V1D, CXCR1, ATP6AP1, ADAM17, ATP6V1B2, ATP6V0E1, CXCL8
bioplanet	bioplanet_Epithelial cell signaling in Helicobacter pylori infection	5.50066e-05	0.000935648	0.557332	0.529312	1.96467	53	ATP6V0D2, CXCL1, MAPK11, LYN, ATP6V1A, SRC, TCIRG1, HBEGF, ATP6V0D1, ATP6V0A1, PAK1, ATP6V1D, CXCR1, ATP6AP1, ADAM17, ATP6V1B2, ATP6V0E1, CXCL8
GOBP	GOBP_POSITIVE_REGULATION_OF_PROTEIN_METABOLIC_PROCESS	5.51533e-05	0.000936841	0.557332	0.272902	1.3797	1052	CLU, MARCO, NRG1, CX3CR1, S100A12, S100A9, PTAFR, ENG, FCGR1A, RNF144B, TREM2, FAM20A, S100A8, MEFV, ARRDC4, LILRA5, SPHK1, NRP1, PLAUR, SLC11A1, THBS1, OSM, ATG10, CTSD, NOD2, FPR2, DAPK1, CASP4, PYCARD, CARD9, JDP2, TNFRSF1A, CD300A, TNFSF12, GPRC5A, LDLR, GRN, AIF1, PLD1, HES1, HFE, CTSC, LRP1, BCL3, ENO1, P2RX1, CLEC7A, LGMN, DAB2, CASP1, PLXNB2, IL18, LIF, TEK, AZU1, TRIB1, FLOT1, HGF, FN1, …
GOBP	GOBP_STEROID_METABOLIC_PROCESS	5.68174e-05	0.000963771	0.557332	0.38723	1.74175	181	ABCG4, ADM, CYP39A1, LDLR, CYP3A5, LGMN, DAB2, LIPA, ASAH1, TSPO, SOAT1, G6PD, DGAT2, NPC2, CEBPA, DHRS9, IL1A, AKR1C1, SC5D, RXRA, BMP6, TTC39B, LPCAT3, SCARF1, APP, PMVK, CYP1B1, SRD5A3, ACOT8, CYB5R1, FMO5, ACAA1, SPP1, OSBPL1A, LAMTOR1, TNF, HSD3B7, GBA, ACADVL, INSIG1, FDX1, SNAI1, H6PD, APOBR, HSD17B12, POR, HSD11B1, APOE, DHH, ATP1A1, RDH5, SREBF2, ABCA1, EPHX2, EBPL, APOL2, CLN8, CLCN2, C…
GOBP	GOBP_PROTEIN_MODIFICATION_BY_SMALL_PROTEIN_REMOVAL	5.76011e-05	0.000975712	0.557332	-0.351524	-1.76753	139	SUPT20H, USP13, TNFAIP3, USP47, COPS2, MINDY2, SENP2, WDR48, USP20, SENP7, ITCH, TADA1, MINDY3, OTULIN, SPATA2, UIMC1, USP33, TADA2B, USP12, VCPIP1, USP1, OTULINL, USP21, USP14, SENP6, USP7, SART3, USP30, SF3B3, TAF5L, TRIM21, COPS3, TAF7, ZRANB1, CYLD, OTUD7B, USP19, SGF29, OTUD4, SENP5, TAF5, USP10, COPS7B, TAF6L, YOD1, USP4, USP48, TAF2, USP28, ASXL1, USP11, OTUD6B, USP37, JOSD1, USP25, COPS4,…
REACTOME	REACTOME_ANTIGEN_PROCESSING_UBIQUITINATION_PROTEASOME_DEGRADATION	5.80234e-05	0.000981509	0.557332	-0.294959	-1.60055	268	MEX3C, ASB1, FBXL14, TPP2, MYLIP, FBXL4, SIAH2, HERC4, HECTD1, CDC23, SKP2, FBXL3, KLHL11, SMURF2, FBXL5, FBXW8, KLHL3, PJA1, HERC3, KCTD7, UBE2J1, ITCH, UBE2O, DCAF1, UBE2Z, NEDD4, KBTBD7, UBE3C, FBXW4, ASB2, FBXL20, BTRC, RNF6, CUL3, RNF138, RNF220, ARIH2, MGRN1, CDC26, FBXO7, UBE4A, PJA2, CUL1, BTBD6, DET1, RLIM, TRIM21, TRIM32, UBE3B, UBA3, TRIM11, TRIM4, KLHL41, UBE2S, WSB1, LTN1, FBXL16, MI…
GOBP	GOBP_REGULATION_OF_INFLAMMATORY_RESPONSE_TO_ANTIGENIC_STIMULUS	5.86137e-05	0.000990127	0.557332	0.616924	2.05096	32	HCK, FGR, TREM2, FCGR2B, NOD2, RHBDF2, LYN, IL10, SRC, YES1, FUT7, FURIN, C3, SYK, GPX1, TNF
GOBP	GOBP_NEGATIVE_REGULATION_OF_TRANSMEMBRANE_TRANSPORT	5.87396e-05	0.000990887	0.557332	0.483713	1.905	75	GRB10, THBS1, FKBP1B, MMP9, SLC43A2, GEM, GPR35, SLC6A9, OAZ1, YWHAE, EPHB2, PID1, IL1B, CBARP, GSTO1, CALM3, SESTD1, FABP5, PPIF, TNF, RGS2, VDAC1, SLC30A1, FKBP1A, CTTNBP2NL, SRI, KCNE3, AKT1, OXSR1
GOBP	GOBP_REGULATION_OF_MUSCLE_CONTRACTION	5.92819e-05	0.000996203	0.557332	0.464241	1.8984	88	TRPM4, PTAFR, SPHK1, DOCK4, ENO1, P2RX1, GUCY1A1, FKBP1B, DOCK5, KCNQ1, ITGA2, ATP2A2, ADORA2B, PRKACA, CTTN, SLC8A1, GSTO1, MYL9, ADRB2, EHD3, TMEM38B, CALM3, KCNJ2, ARHGAP42, RGS2, RNF207, SRI, TMEM38A, ATP1A1, PTGS2, SETD3, EDN1, P2RX4, SLC9A1, RHOA, KCNMA1, SCN4A
GOBP	GOBP_REGULATION_OF_PLATELET_ACTIVATION	5.92987e-05	0.000996203	0.557332	0.601856	2.04924	37	CD9, SELP, EMILIN2, LYN, THBD, FCER1G, TLR4, ALOX12, PLEK, GP1BA, GP9, PRKCD, SYK, IL6, SERPINE2, PLA2G4A, APOE, TEC, GP6, ADAMTS18, NOS3, DMTN, PRKCA, GP5, SH2B3, MMRN1
GOBP	GOBP_RESPONSE_TO_NUTRIENT	5.92819e-05	0.000996203	0.557332	0.464644	1.90005	88	AQP3, SOD2, HMOX1, VDR, NOD2, FES, FKBP1B, TSPO, CYBB, ACSL1, LPL, ITGA2, ARSB, IL1A, RXRA, KYNU, MTHFR, SLC8A1, CYP1B1, APAF1, GAS6, FOLR2, GPX1, MN1, SPP1, ALAD, DCPS, CDKN2D, POR, ERCC1, PTGS2, KANK2, SLC27A4, IGFBP2, CAT, GCLM
WP	WP_CORI_CYCLE	5.94237e-05	0.000996935	0.557332	0.837622	2.09949	10	G6PD, LDHA, TALDO1, GAPDH, PGAM1, TPI1, PGK1, HK1, PFKP
GOBP	GOBP_NEGATIVE_REGULATION_OF_IMMUNE_EFFECTOR_PROCESS	5.95388e-05	0.000997499	0.557332	0.475739	1.87918	76	CX3CR1, CCR2, HMOX1, LGALS3, FCGR2B, NOD2, HLX, LILRB4, CD300A, SPI1, GRN, FGL2, IRAK3, HFE, VSIG4, IL10, CLEC4G, LOXL3, BCL6, TMBIM6, TNF, RABGEF1, PARP3, SERPING1, PTPN6
WP	WP_COMPLEMENT_ACTIVATION	6.00537e-05	0.00100475	0.557332	0.868715	2.00837	8	CFP, C1QB, C1QC, CFD, C3
GOBP	GOBP_REGULATION_OF_CELL_CYCLE_PHASE_TRANSITION	6.0403e-05	0.00100907	0.557332	-0.273807	-1.52067	323	RIOK2, XPC, PLRG1, CDC23, TAF1, WAC, SYF2, BTN2A2, USP47, ZFP36L2, JADE1, SENP2, DYRK3, RGCC, RBL2, PLK2, RPA2, NSUN2, APBB1, MTA3, AMBRA1, MRE11, RAD21, BUB3, APPL2, ZW10, CDKN1B, APBB2, BLM, EME1, ETAA1, CENPJ, CDC7, UIMC1, CDC5L, CDC73, CTDSP2, CUL3, NPM1, CDC26, FBXO7, CDC14A, CCAR2, TFAP4, PCID2, SDE2, HINFP, ZNF830, RFWD3, DDX3X, PAF1, RRM1, ZNF207, MAD2L1BP, VPS4B, CUL4B, CCNG1, TP53, FOXN…
GOBP	GOBP_REGULATION_OF_DENDRITIC_CELL_DIFFERENTIATION	6.0559e-05	0.00100907	0.557332	0.887556	1.96359	7	LGALS3, FCGR2B, TMEM176B, CEBPB
GOBP	GOBP_WOUND_HEALING_INVOLVED_IN_INFLAMMATORY_RESPONSE	6.0559e-05	0.00100907	0.557332	0.887644	1.96378	7	HMOX1, TIMP1, TLR4, IL1A, HIF1A
GOBP	GOBP_POSITIVE_REGULATION_OF_PROTEOLYSIS	6.10107e-05	0.00101416	0.557332	0.343889	1.62425	287	CLU, S100A9, RNF144B, TREM2, S100A8, MEFV, CTSD, DAPK1, CASP4, PYCARD, CARD9, GRN, CTSC, ENO1, P2RX1, CLEC7A, LGMN, DAB2, CASP1, TRIB1, FN1, LYN, SRC, TNFRSF1B, NLRC4, VSIR, CEBPA, MDM2, LPCAT3, F3, ANXA2, APP, IL1B, NLRP3, CAPN3, HIP1, ACER2, APAF1, NLRP12, FURIN, PRELID1, ADAM9, GSN, ADAM8, PSENEN, SYK, SNX33, GABARAP, CCDC22, TTBK1, IFT57, NCSTN, PICALM, NFE2L2, TNF, DISC1, PSEN1, RBX1, GBA, P…
GOBP	GOBP_REGULATION_OF_MAST_CELL_ACTIVATION	6.10301e-05	0.00101416	0.557332	0.630266	2.07992	31	ADGRE2, FGR, HMOX1, NECTIN2, CD300A, GATA2, FES, CD300LF, LYN, PLSCR1, ADORA2B, GAB2, SYK, RABGEF1, STXBP2, PTPN6
GOBP	GOBP_CELLULAR_RESPONSE_TO_PURINE_CONTAINING_COMPOUND	6.18298e-05	0.00102467	0.538434	0.830322	2.00418	9	SLC8A1, P2RY1, TMEM38B, TRPM2, RYR1, P2RY6, TMEM38A
GOBP	GOBP_NEGATIVE_REGULATION_OF_MYELOID_LEUKOCYTE_MEDIATED_IMMUNITY	6.18298e-05	0.00102467	0.538434	0.830317	2.00417	9	CX3CR1, CCR2, HMOX1, FCGR2B, CD300A, SPI1, RABGEF1
GOBP	GOBP_RESPONSE_TO_PEPTIDE	6.26029e-05	0.00103608	0.538434	0.336461	1.60653	333	ADM, CYFIP1, TREM2, GRB10, FCGR2B, RAB31, NOD2, FPR2, CASP4, TIMP1, CARD9, RETN, BAIAP2, LRP1, AGTRAP, LGMN, TLR2, JAG1, SH2B2, CYBB, PTPRE, LYN, IL10, KCNQ1, SRC, LPL, MMP9, PTPN1, PRKCI, TLR4, CD36, PXN, SOCS2, RAB13, TLR6, PLCB1, LTA4H, SORT1, MDM2, RHOQ, APP, EPHB2, PID1, ZBED3, IRF5, IL1B, CYBA, CYP1B1, RAB10, FUT7, ESRRA, GJB2, NOTCH1, ADRB2, PTPN2, VIM, ICAM1, ABCC1, PRKCD, SESN2, MMP2, NF…
REACTOME	REACTOME_NS1_MEDIATED_EFFECTS_ON_HOST_PATHWAYS	6.31326e-05	0.00104343	0.538434	-0.552171	-2.09537	35	NUP107, KPNA1, NUP160, NUP43, RAE1, NUP54, NUP35, KPNB1, NUP42, KPNA2, NUP88, NUP155, KPNA5, RANBP2, NUP62, CPSF4, KPNA4, KPNA3, NUP133, NUP210
GOBP	GOBP_DEFENSE_RESPONSE_TO_FUNGUS	6.36977e-05	0.00105125	0.538434	0.684015	2.10411	23	CX3CR1, S100A12, S100A9, S100A8, CARD9, SPI1, CLEC7A, CLEC4A, GAPDH, CLEC4E, COTL1
GOBP	GOBP_REGULATION_OF_DENDRITIC_CELL_ANTIGEN_PROCESSING_AND_PRESENTATION	6.37772e-05	0.00105125	0.538434	0.829304	2.00172	9	FCGR2B, SLC11A1, THBS1, NOD2, CD68, FGL2
GOBP	GOBP_REGULATION_OF_WOUND_HEALING	6.43338e-05	0.001059	0.538434	0.480598	1.90702	78	ALOX5, CD9, TFPI, PLAU, THBS1, CLEC7A, SERPINE1, THBD, HBEGF, CD36, MYLK, ALOX12, F3, EPHB2, GP1BA, PRKCD, CD109, ACTG1, NFE2L2, TNF, PROS1, PTK2, SERPINE2, ADTRP, SERPING1, ST3GAL4, MIR29A, APOE, SERPINB2, ANO6, CLDN4, EDN1, CLASP2, CRK, ITGB1, VIL1, FGF2, ADAMTS18, NOS3, DMTN, ANXA1, CLDN3, SH2B3, MTOR, MMRN1
GOBP	GOBP_CARBOXYLIC_ACID_TRANSPORT	6.4688e-05	0.00106287	0.538434	0.400677	1.76292	151	EMB, PTGES, AQP9, SLC47A1, ABCC4, SLC46A1, SLC1A3, SLC7A7, PSAP, TNFRSF11A, SERINC5, ABCC3, CD36, SLC43A2, SLCO2B1, SLC16A3, IL1A, AKR1C1, SLC6A6, SLC6A9, SLC36A4, GFAP, SLC7A8, IL1B, ABCC1, APBA1, SLC1A2, SLC26A8, SYK, FOLR2, SLC38A7, TNF, RGS2, PSEN1, SLC1A5, ABCC6, PLA2G4A, SLCO3A1, SLC26A10, SLC7A11, EDN1, SLC36A1, SLC66A1, SLC27A4, SLC7A9, P2RX4, SLC25A29, PLA2G6, CLN8, SLC25A11, ABCC2, SLC7…
GOBP	GOBP_POSITIVE_REGULATION_OF_CATALYTIC_ACTIVITY	6.47424e-05	0.00106287	0.538434	0.282192	1.41512	805	CLU, CCL23, NRG1, S100A12, S100A9, PTAFR, FCGR1A, ASAP2, FGR, TNFAIP8L3, RASGRP4, TREM2, FAM20A, S100A8, MEFV, ARRDC4, LILRA5, VDR, SLC11A1, THBS1, ARAP3, MERTK, CTSD, NOD2, FPR2, PSAP, DAPK1, CASP4, PYCARD, ITGAM, CARD9, CD300A, GPRC5A, GRN, CCL2, CCL20, RGL3, MTSS2, P2RX1, CLEC7A, LGMN, CASP1, IL18, TEK, AZU1, FN1, CCL3, ADPRH, LYN, ACSL1, SRC, TBC1D12, TNFRSF11A, C5AR1, PTPN1, CCL8, PLSCR1, SE…
GOBP	GOBP_HIPPOCAMPAL_NEURON_APOPTOTIC_PROCESS	6.55639e-05	0.00107492	0.538434	0.964074	1.78045	4	CX3CR1, TREM2, ITGAM, TYROBP
GOBP	GOBP_GENERATION_OF_PRECURSOR_METABOLITES_AND_ENERGY	6.6009e-05	0.00108077	0.538434	0.336158	1.61018	345	NDUFS8, PYGL, SOD2, HK3, NCF2, HK2, CAVIN3, ENO1, IDH1, NQO2, CYBB, G6PD, PGD, GALK1, GNPDA1, SLC2A6, CEBPA, TREX1, ACSS2, HIF1A, AK4, LDHA, CS, TKT, NCF1, APP, PID1, TALDO1, CYBA, GAPDH, IDO1, MTFR1L, STEAP4, PRELID1, GAA, PLEC, PGAM1, TPI1, PGK1, GYG1, PPIF, NDUFV2, TNF, ANTKMT, NDUFB7, COX4I1, PSEN1, GBA, PFKL, INSR, NDUFB2, ACADVL, HK1, MLXIPL, FDX1, NDUFS6, NCOR1, ATP5F1E, ATP5F1D, H6PD, NDU…
REACTOME	REACTOME_MAP2K_AND_MAPK_ACTIVATION	6.61741e-05	0.00108168	0.538434	0.59722	2.00142	34	VWF, VCL, FN1, SRC, ITGA2B, LAMTOR2, ARRB1, IQGAP1, TLN1, YWHAB, ACTG1, MAPK3, RAP1A, ACTB, ARRB2, ARAF
GOBP	GOBP_CELLULAR_COMPONENT_MORPHOGENESIS	6.62415e-05	0.00108168	0.538434	0.310706	1.51918	454	MYH14, EMB, CD9, NIBAN2, CYFIP1, NECTIN2, NRP1, ALCAM, VCL, BAIAP2, TLR2, PLXNB2, NOTCH2, FLOT1, FN1, B4GALT5, GFRA3, SRC, SS18L1, BRSK2, NPTN, SPAG9, ABI3, PLXNC1, SEMA4A, VEGFA, LRTM2, OLFM1, CSF1R, APLP2, SGK1, LYPLA2, FARP1, S100A6, IQGAP1, CTTN, EPB41L3, APP, EPHB2, PID1, GAS7, DOCK7, CORO1C, CAPN3, RAB10, SEMA6B, CFL1, SEMA3C, MYL9, NOTCH1, PGRMC1, SHTN1, ACTA1, BCL2L1, PAK1, PLEC, SCN1B, P…
REACTOME	REACTOME_FREE_FATTY_ACIDS_REGULATE_INSULIN_SECRETION	6.66982e-05	0.00108769	0.538434	0.827743	1.99795	9	CD36, GNAQ, PLCB1, GNA15, GNA11, ACSL4, PLCB2, PLCB3
REACTOME	REACTOME_SIGNALING_BY_MODERATE_KINASE_ACTIVITY_BRAF_MUTANTS	6.70505e-05	0.00109198	0.538434	0.59189	2.00664	36	VWF, VCL, FN1, SRC, ITGA2B, MAP3K11, ARRB1, IQGAP1, TLN1, YWHAB, ACTG1, MAPK3, RAP1A, ACTB, ARRB2, ARAF
GOBP	GOBP_IRON_ION_HOMEOSTASIS	6.76942e-05	0.00109965	0.538434	0.500477	1.92529	65	SOD2, STEAP3, HMOX1, LCN2, SLC11A1, SLC46A1, CYBRD1, HFE, RHAG, ATP6V1A, SLC25A37, ATP6V0D1, SLC6A9, HIF1A, BMP6, FTL, STEAP4, ATP6AP1, PICALM, FRRS1, SRI
GOBP	GOBP_SENSORY_PERCEPTION	6.77014e-05	0.00109965	0.538434	0.353382	1.64418	236	MYH14, MYO7A, PTGES, PTAFR, CCR2, SLC1A3, SCARB2, GSDME, PGAP1, CCL2, TMEM150C, COCH, CCL3, IL10, KCNQ1, C5AR1, CD36, ITGA2, IL1A, TGFBI, WFS1, PITPNA, NR2F6, TULP2, CDH23, P2RY1, PPT1, IRX5, FFAR4, ACP3, BEST1, GJB2, HEXB, GJB6, MGLL, TMTC4, FABP5, LAMB2, GNB1, CHD7, GPX1, SPRY2, TNF, LOXHD1, CDK5, RDH12, RP2, SERPINE2, CDKN2D, PLCB2, ABCC6, WDR1, ATF6, RDH5, NAV2, PTGS2, MAPK3, CEMIP, FXN, EDN1…
GOBP	GOBP_SARCOPLASMIC_RETICULUM_CALCIUM_ION_TRANSPORT	6.85037e-05	0.00111121	0.538434	0.68042	2.06444	22	NOL3, FKBP1B, CCL3, ATP2A2, PRKACA, SLC8A1, GSTO1, TMEM38B, CALM3, CHD7, RYR1, CCR5, SRI, TMEM38A
REACTOME	REACTOME_TP53_REGULATES_TRANSCRIPTION_OF_ADDITIONAL_CELL_CYCLE_GENES_WHOSE_EXACT_ROLE_IN_THE_P53_PATHWAY_REMAIN_UNCERTAIN	6.91507e-05	0.00112022	0.538434	-0.680031	-2.17883	20	CNOT8, CNOT6L, RGCC, PLK2, CNOT2, CENPJ, CNOT1, CNOT7, NPM1, BTG2, CNOT6, TP53, CNOT4, PLK3
GOBP	GOBP_SECOND_MESSENGER_MEDIATED_SIGNALING	7.03159e-05	0.00113759	0.538434	0.376066	1.69344	186	ADM, NRG1, CX3CR1, TRPM4, CCR2, SELP, TREM2, FPR1, GUCY1B1, SPHK1, THBS1, FPR2, MCTP1, CCL20, CLEC7A, GUCY1A1, FKBP1B, AZU1, CAMKK2, CCL3, P2RY12, CD36, CCR1, TPCN2, VEGFA, ATP2A2, ADORA2B, CMKLR1, GRIN2C, PRKACA, PLEK, CCRL2, SLC8A1, FFAR4, GSTO1, TMEM38B, CALM3, TRPM2, SYK, CIB1, CXCR1, HTT, TNF, CAP1, MCOLN1, CCR5, CXCL8, RNF157, LAT2, TMEM38A, BTK, APOE, PTPRJ, MAFA, GNAI1, EDN1, DDAH2, P2RX4…
GOBP	GOBP_LYMPHOCYTE_CHEMOTAXIS	7.06559e-05	0.00114159	0.538434	0.610196	2.04945	33	CCL23, CCR2, CCL2, CCL20, CXCL16, CCL3, CCL8, CCL7, SLC8B1, GAS6, PLEC, ADAM8, ADAM17, HSD3B7
GOBP	GOBP_TRANSMEMBRANE_RECEPTOR_PROTEIN_TYROSINE_KINASE_SIGNALING_PATHWAY	7.12051e-05	0.00114894	0.538434	0.324934	1.57012	394	NRG1, NIBAN2, HCK, CYFIP1, FGR, RASGRP4, GRB10, NRP1, PLAUR, THBS1, PTPN18, MVP, MERTK, GPRC5A, ZFYVE28, FES, BAIAP2, IGFBP4, LRP1, LGMN, RHBDF2, TEK, HGF, SH2B2, PTPRE, LYN, GFRA3, SRC, MMP9, PTPN1, SPRY1, HBEGF, NPTN, PXN, SOCS2, MTSS1, VEGFA, PLCB1, CSF1R, GAB2, SORT1, HIF1A, YES1, F3, NCF1, IQGAP1, RHOQ, EPHB2, PID1, IL1B, HIP1, FUT7, MAPKAPK3, PTPN12, ADRB2, PTPN2, PTGIR, PRKCD, PAK1, TNK2, …
WP	WP_AEROBIC_GLYCOLYSIS	7.15666e-05	0.00115326	0.538434	0.826429	1.99478	9	ENO1, LDHA, GAPDH, TPI1, PGK1, HK1
bioplanet	bioplanet_NOD signaling pathway	7.17304e-05	0.00115438	0.538434	0.48147	1.87253	70	MEFV, NOD2, CASP4, PYCARD, CARD9, CXCL1, MAPK11, CCL2, NAIP, CASP1, IL18, CCL8, NLRC4, CCL7, IL1B, NLRP3, NLRP12, CARD6, IL6, TNF, PRDM1, CASP7, AIM2, CXCL8, MAPK3, RIPK2, NLRP1, CASP5, IRAK1, AAMP, CASP9, NLRP2
WP	WP_LTF_DANGER_SIGNAL_RESPONSE_PATHWAY	7.18502e-05	0.00115479	0.538434	0.74202	2.09733	16	TLR2, CD14, TLR4, IL1A, IL1B, MYD88, IL6, TNF, TREM1, CXCL8, IRAK1
bioplanet	bioplanet_Axon guidance	7.21771e-05	0.00115729	0.538434	0.362516	1.68038	224	MYH14, TREM2, NRP1, COL9A2, ALCAM, FES, AP2A1, ITGAV, LAMC1, PLXNB2, SRC, SDCBP, ITGA2B, TYROBP, DNM1, ITGA2, PLXNC1, SEMA4A, PITPNA, MYL12B, ITGA9, EPHB2, SEMA6B, CFL1, SEMA3C, MYL9, RHOB, PAK1, MYH10, SCN1B, RRAS, TLN1, NRP2, YWHAB, RHOG, CAP1, CDK5, LIMK2, LIMK1, PTK2, CSNK2A2, PLXND1, ST8SIA4, RPS6KA4, NUMB, MYO10, NCAM1, ARHGEF12, MAPK3, ARHGEF11, AP2M1, AP2S1, MSN, ANK1, AP2A2, RDX, SOS1, S…
bioplanet	bioplanet_T cell receptor regulation of apoptosis	7.21947e-05	0.00115729	0.538434	0.307874	1.51148	486	CLU, PTGES, CCR2, SOD2, TNFRSF8, STOM, SPHK1, MSR1, SERPINB1, UBE2M, CTSB, CASP4, S100A4, PYCARD, CARD9, TNFRSF1A, IL1RAP, CCL20, BCL3, ENO1, IKBIP, NAIP, TLR2, CASP1, IL1R1, CCL3, CYBB, SOAT1, IL10, IL1RN, MGST2, FCER1G, TNFRSF1B, CSF2RB, ITSN1, TLR8, CEBPD, CCR1, TSTA3, TLR6, CTH, IL1A, TREX1, CSF1R, LGALS8, XRN2, ADORA2B, MYB, TLR1, OAZ1, MAP3K8, LYPLA2, CS, S100A6, PCYOX1, IER3, CASP6, ETS2, …
WP	WP_FOCAL_ADHESION	7.23884e-05	0.00115888	0.538434	0.403204	1.7619	141	HCK, VWF, FGR, ITGB5, THBS1, VCL, ZYX, ITGAV, LAMC1, HGF, FN1, SRC, ITGA2B, PXN, ITGA2, VEGFA, COMP, MYLK, MYL12B, ITGA9, MYL9, PAK1, TLN1, TNK2, LAMB2, ACTG1, SPP1, PARVG, PTK2, ILK, LAMB3, PPP1CA, VAV3, MAPK3, PIK3CB, CAPN2, AKT1, RAP1A, BAD, SOS1, ACTB, VASP, RASGRF1, MET, TNN, RHOA, CRK, ITGB1, ITGA5, SHC1, MAP2K1, GRB2, LAMA3, PAK3, DIAPH1, ACTN4, ITGB4, PRKCA, PPP1R12B, CCND1
GOBP	GOBP_CENTRIOLE_ASSEMBLY	7.25467e-05	0.00115989	0.538434	-0.546427	-2.12676	39	CEP76, MDM1, PLK2, CEP135, CEP44, CCP110, CENPJ, CEP120, RBM14, SPICE1, NPM1, PLK4, VPS4B, PPP1R35, RTTN, CEP72, CDK5RAP2, CEP152, OFD1
PID	PID_IL8_CXCR2_PATHWAY	7.29582e-05	0.00116495	0.538434	0.63103	2.05076	29	HCK, FGR, LYN, DNM1, PLCB1, ARRB1, GNA15, GNB1, CXCL8, PLCB2, PLD2, AKT1, PLCB3, ARRB2, VASP, PPP2R1A, CBL, CXCR2, PRKCA, RAB7A, DOCK2, PRKCB
GOBP	GOBP_NEUROINFLAMMATORY_RESPONSE	7.31493e-05	0.00116633	0.538434	0.626302	2.06684	31	TREM2, SPHK1, LDLR, GRN, CTSC, IL18, CCL3, DAGLA, MMP9, TNFRSF1B, IL1B, TTBK1, IL6, TNF, SYT11, PTGS2
BIOCARTA	BIOCARTA_LAIR_PATHWAY	7.34253e-05	0.00116633	0.538434	0.76617	2.0756	13	SELP, IL1A, ICAM1, C3, IL6, TNF, SELPLG, ITGB2, CXCL8, ITGB1
WP	WP_CELLS_AND_MOLECULES_INVOLVED_IN_LOCAL_ACUTE_INFLAMMATORY_RESPONSE	7.34253e-05	0.00116633	0.538434	0.76617	2.0756	13	SELP, IL1A, ICAM1, C3, IL6, TNF, SELPLG, ITGB2, CXCL8, ITGB1
bioplanet	bioplanet_Cells and molecules involved in local acute inflammatory response	7.34253e-05	0.00116633	0.538434	0.76617	2.0756	13	SELP, IL1A, ICAM1, C3, IL6, TNF, SELPLG, ITGB2, CXCL8, ITGB1
bioplanet	bioplanet_Transferrin endocytosis and recycling	7.3659e-05	0.00116853	0.538434	0.719579	2.11278	19	STEAP3, ATP6V0D2, ATP6V1A, TCIRG1, ATP6V0D1, ATP6V0A1, ATP6V1D, ATP6V1B2, MCOLN1, INSR, ATP6V0E1
REACTOME	REACTOME_REGULATION_OF_INSULIN_SECRETION	7.48813e-05	0.00118638	0.538434	0.557718	2.01801	46	GNB4, PRKAR2B, MARCKS, CD36, GNAQ, PLCB1, PRKACA, IQGAP1, STX1A, GNG11, GNA15, GNB1, GNG5, GNA11, ACSL4, PLCB2, GNB2, RAP1A, PLCB3, GNAI1
bioplanet	bioplanet_PDGFB signaling pathway	7.53299e-05	0.00119195	0.538434	0.428505	1.81715	117	HCK, FGR, GRB10, SPHK1, DOCK4, BAIAP2, LRP1, ITGAV, LYN, SRC, PTPN1, YWHAE, YES1, IQGAP1, CTTN, BRK1, ARPC3, RAB4A, PTPN2, PRKCD, PAK1, YWHAB, NCKAP1, EPS8, STAT3, PLA2G4A, PTPRJ, MAPK3, PIK3CB, SFN, RAP1A, PIN1, SOS1, ARHGDIA, ARPC2, GAB1, RHOA, CRK, EIF2AK2, TAGLN, SHC1, PPP2R1A, CBL, MAP2K1, GRB2, SLA, NCK2, ARAP1, MAP2K4, YWHAG, ACTN4, PRKCA, ACTR2, ACTR3
KEGG	KEGG_TIGHT_JUNCTION	7.60388e-05	0.00120161	0.538434	0.457822	1.85347	86	MYH14, CLDN5, MAP3K20, SRC, PRKCI, RAB13, MYL12B, YES1, CTNNA1, CTTN, EPB41L3, MRAS, YBX3, MYL9, PRKCD, PPP2CB, MYH10, RRAS, HCLS1, ACTG1, CSNK2A2, PARD3, CGN, AFDN, CLDN4, AKT1, MAGI3, GNAI1, ACTB, RHOA, CDK4, PPP2R1A, EXOC4, EPB41L1, PPP2R1B, ACTN4, PRKCA, CLDN3
GOBP	GOBP_NEGATIVE_REGULATION_OF_ANTIGEN_PROCESSING_AND_PRESENTATION	7.67045e-05	0.00121057	0.538434	0.914906	1.92298	6	FCGR2B, THBS1, CD68, FGL2, HFE
GOBP	GOBP_POSITIVE_REGULATION_OF_IMMUNE_EFFECTOR_PROCESS	7.70231e-05	0.00121403	0.538434	0.380969	1.71215	178	PTAFR, CCR2, ADGRE2, FGR, TREM2, HMOX1, NECTIN2, NOD2, HLX, ITGAM, CD300A, SPI1, FCN1, GATA2, FES, CLEC7A, IL18, IL1R1, LYN, IL10, TYROBP, TLR4, CD36, SCIMP, ADORA2B, MYB, GAB2, EPHB2, IL1B, NLRP3, LACC1, GPRC5B, TICAM1, C3, CADM1, SYK, LAMP1, IL6, TNF, RABGEF1, STXBP2, ITGB2, CD177, HK1, MAD2L2, CD86, PTPN6, BTK, PTPRJ, FCN2
GOBP	GOBP_DIGESTIVE_SYSTEM_PROCESS	7.8148e-05	0.00123018	0.538434	0.526852	1.93988	52	SNX10, VDR, SLC46A1, NOD2, UGCG, LDLR, TIFAB, KCNQ1, TLR4, CD36, NR1H3, SLC2A5, AKR1C1, SGK1, LPCAT3, HRH2
GOBP	GOBP_REGULATION_OF_CALCIUM_ION_TRANSMEMBRANE_TRANSPORT	7.86549e-05	0.00123564	0.538434	0.458641	1.8755	88	P2RX1, FKBP1B, LYN, G6PD, GEM, VMP1, STAC3, GPR35, YWHAE, PRKACA, SLC8A1, CYBA, CBARP, CAPN3, GSTO1, EHD3, TMEM38B, CALM3, SESTD1, HTT, CHD7, JSRP1, CDK5, VDAC1, P2RY6, FKBP1A, PTPN6, SRI, TMEM38A, AHNAK, CEMIP, PLA2G6, SLC9A1
REACTOME	REACTOME_REGULATION_OF_TP53_ACTIVITY	7.8697e-05	0.00123564	0.538434	-0.344738	-1.72357	141	DYRK2, BRPF3, MAP2K6, TAF1, PRKAA1, RPA2, EHMT2, KAT6A, MRE11, BLM, RFC5, TBP, MTA2, PIP4K2A, HDAC1, RFFL, MAPKAP1, HDAC2, USP7, ING2, CCNG1, TP53RK, TP53, ATM, TAF11, TAF7, PPP1R13B, STK11, PLK3, RAD9A, PIP4K2B, KMT5A, GATAD2B, PRKAB1, TAF5, SUPT16H, PRKAB2, RAD17, TOPBP1, TAF9B, EHMT1, RICTOR, UBB, RBBP7, TOP3A, AKT2, TTC5, BRPF1, NOC2L, PRR5, PHF20, TAF2, ING5, TAF3, BRIP1, RAD1, JMY, CSNK2A1,…
GOBP	GOBP_ALTERNATIVE_MRNA_SPLICING_VIA_SPLICEOSOME	7.91707e-05	0.00124	0.538434	-0.457688	-1.97552	59	HNRNPU, RBM5, CDK13, SRSF6, SRSF2, RBFOX2, RBM7, MBNL1, DHX9, SFPQ, STRAP, CELF1, RBM8A, SLU7, YTHDC1, FAM172A, HNRNPM, TRA2B, WTAP, SAP18, REST, RBM15, MBNL3, DDX5, MBNL2, SRSF1, KHDRBS1, RBM10, SRSF12
PID	PID_INTEGRIN2_PATHWAY	7.92782e-05	0.00124	0.538434	0.728051	2.12238	18	PLAU, PLAUR, ITGAM, TGFBI, GP1BA, ICAM3, ICAM1, C3, ITGAX, ITGB2
bioplanet	bioplanet_Integrin beta-2 pathway	7.92782e-05	0.00124	0.538434	0.728051	2.12238	18	PLAU, PLAUR, ITGAM, TGFBI, GP1BA, ICAM3, ICAM1, C3, ITGAX, ITGB2
REACTOME	REACTOME_INTERACTIONS_OF_REV_WITH_HOST_CELLULAR_PROTEINS	7.95772e-05	0.00124309	0.538434	-0.568458	-2.12327	33	NUP107, NUP160, NUP43, RAE1, NUP54, NPM1, NUP35, KPNB1, NUP42, XPO1, NUP88, NUP155, RANBP2, NUP62, RAN, RANGAP1, NUP133, NUP210
GOBP	GOBP_MULTICELLULAR_ORGANISMAL_HOMEOSTASIS	8.0284e-05	0.00125253	0.538434	0.337196	1.60452	323	PTGES, RAB3D, CCR2, AQP3, SNX10, LCN2, GRB10, SLC11A1, NOD2, UGCG, ALDH1A1, CLDN5, VCL, GATA2, HFE, METRNL, LAMC1, G0S2, LIPA, IL18, PRCP, RHAG, GATM, ACSL1, SRC, TNFRSF11A, LYZ, TCIRG1, TLR4, CD36, NR1H3, VEGFA, COMP, IL1A, CSF1R, ZNF516, WFS1, CMKLR1, BMP6, ALOX12, PRKACA, CEBPB, CDH23, IL1B, DOCK7, FFAR4, NOTCH1, TPP1, ADRB2, GJB6, DYNC1H1, PLEC, ADAM8, GADD45G, FABP5, TRPM2, SYK, ESAM, PLAC8,…
GOBP	GOBP_REGULATION_OF_CHROMATIN_ASSEMBLY_OR_DISASSEMBLY	8.05899e-05	0.00125571	0.538434	-0.593717	-2.10573	28	TLK1, RESF1, TLK2, SPTY2D1, PIK3CA, TASOR, MORC2, ATF7IP2, ZNF304, ATF7IP, LMNTD2, SETDB2, PHF2, CTR9, TRIM28, PPHLN1, SIN3A, ZNF445, PHF8, TET1
GOBP	GOBP_ADP_METABOLIC_PROCESS	8.10011e-05	0.00126051	0.538434	0.486001	1.88891	69	HK3, HK2, ENO1, GALK1, SLC2A6, TREX1, HIF1A, AK4, LDHA, APP, GAPDH, PGAM1, TPI1, PGK1, PSEN1, PFKL, INSR, HK1, MLXIPL, NCOR1, STAT3, ADPGK, PFKP, BAD, NUDT9, HDAC4, AK2
bioplanet	bioplanet_MHC class II antigen presentation	8.27225e-05	0.00128566	0.538434	0.470294	1.85768	76	CTSD, CTSB, CTSC, CTSL, AP2A1, LGMN, IFI30, CTSS, DNM1, CTSA, DYNC1H1, AP1B1, OSBPL1A, SEC24D, AP1S2, DCTN2, AP2M1, AP2S1, CANX, AP2A2, CTSH, CTSO, KIF23, AP2B1, SPTBN2, DCTN4, CLTC, CD74, KIF3B, ACTR1A
GOBP	GOBP_ANTIGEN_PROCESSING_AND_PRESENTATION_OF_EXOGENOUS_PEPTIDE_ANTIGEN	8.29752e-05	0.00128796	0.538434	0.726987	2.07654	17	FCGR2B, CTSD, CTSL, LGMN, IFI30, CTSS, FCER1G, CLEC4A
HALLMARK	HALLMARK_ADIPOGENESIS	8.31966e-05	0.00128976	0.538434	0.398298	1.76598	157	STOM, RETN, CD151, DHRS7, MTCH2, CAVIN2, IDH1, LPL, ITSN1, CD36, MYLK, PFKFB3, APLP2, CS, ABCB8, TKT, LPCAT3, MTARC2, IFNGR1, TALDO1, BCL6, PIM3, ESRRA, MGST3, ATP1B3, PLIN2, PRDX3, C3, MGLL, ENPP2, DGAT1, PHLDB1, NDUFB7, REEP5, PFKL, TST, GBE1, SLC1A5, CMBL, POR, APOE, DECR1, NDUFS3, SDHC, ABCA1, MRPL15, EPHX2, ARAF, AK2, MDH2, CAT, SCP2, ATP5PO, ACAA2, COX8A, RIOK3, SUCLG1, SOD1, AGPAT3, CPT2, …
bioplanet	bioplanet_Drug metabolism: cytochrome P450	8.39654e-05	0.0012996	0.538434	0.658081	2.0936	25	ALDH3B1, MGST1, MAOA, CYP3A5, MGST2, AKR1C1, GSTP1, CYP1B1, GSTO1, MGST3, FMO5
bioplanet	bioplanet_Actin cytoskeleton regulation	8.40434e-05	0.0012996	0.538434	0.397491	1.7542	154	MYH14, CYFIP1, ITGB5, ITGAM, VCL, BAIAP2, SCIN, ITGAV, CD14, FN1, SSH3, ITGA2B, PXN, ITGA2, MYLK, MYL12B, ITGA9, IQGAP1, MRAS, BRK1, ARPC3, CFL1, MYL9, GSN, PAK1, MYH10, RRAS, NCKAP1, ACTG1, DIAPH2, ITGAX, LIMK2, LIMK1, ITGB2, PTK2, ARHGEF12, PPP1CA, VAV3, MAPK3, PIK3CB, MSN, RDX, SOS1, ACTB, SLC9A1, ARAF, ARPC2, RHOA, NCKAP1L, CRK, ITGB1, VIL1, ITGA5, FGF2, WAS, MAP2K1, SSH1, PAK3, DIAPH1, FGFR3…
GOBP	GOBP_ASTROCYTE_CELL_MIGRATION	8.6854e-05	0.00134136	0.538434	0.863501	1.99632	8	CCR2, CCL2, CCL3, HEXB
bioplanet	bioplanet_Focal adhesion	8.70246e-05	0.00134231	0.538434	0.383213	1.71142	165	HCK, VWF, FGR, ITGB5, THBS1, ITGAM, VCL, ZYX, ITGAV, LAMC1, HGF, FN1, SRC, ITGA2B, PXN, ITGA2, VEGFA, COMP, MYLK, MYL12B, ITGA9, MAP2K3, MYL9, CAPN1, RHOB, PAK1, TLN1, TNK2, LAMB2, ACTG1, SPP1, ITGAX, PARVG, ITGB2, PTK2, ILK, LAMB3, PPP1CA, VAV3, MAPK3, PIK3CB, CAPN2, AKT1, RAP1A, BAD, SOS1, ACTB, ARAF, VASP, RASGRF1, MET, TNN, RHOA, CRK, ITGB1, ITGA5, SHC1, MYL6, MAP2K1, GRB2, LAMA3, PAK3, DIAPH…
GOBP	GOBP_REGULATION_OF_CENTRIOLE_REPLICATION	8.75093e-05	0.00134808	0.538434	-0.673779	-2.1588	20	CEP76, MDM1, PLK2, CENPJ, CEP120, RBM14, SPICE1, NPM1, PLK4, VPS4B, PPP1R35, CDK5RAP2
GOBP	GOBP_REGULATION_OF_SIGNALING_RECEPTOR_ACTIVITY	8.86108e-05	0.00136334	0.538434	0.457259	1.86617	90	CCR2, PLAU, FCGR2B, NRP1, DAPK1, LILRB4, GPRC5A, ZFYVE28, IFNGR2, CCL2, HFE, NPTX2, SERPINE1, IL10, SRC, HBEGF, SLC6A9, HIF1A, NCF1, APP, EPHB2, P2RY1, ADRB2, CAPN1, PRKCD, VPS25, TNF, ADAM17, PSEN1
GOBP	GOBP_REGULATION_OF_BLOOD_CIRCULATION	8.90697e-05	0.00136868	0.538434	0.414657	1.77403	124	ADM, TRPM4, TBXAS1, BVES, DOCK4, P2RX1, FKBP1B, DOCK5, KCNQ1, HBEGF, ATP2A2, DES, YWHAE, MDM2, PRKACA, SLC8A1, GSTO1, GAA, HRH2, EHD3, TMEM38B, SCN1B, CALM3, KCNJ2, MMP2, ARHGAP42, TNF, RGS2, RNF207, SRI, TMEM38A, CYP2J2, ATP1A1, PTGS2, KCNE3, EDN1, MYL4, P2RX4, SCN3B, SLC9A1, MEF2A, RHOA, SREBF1
GOBP	GOBP_NEGATIVE_REGULATION_OF_CYTOKINE_PRODUCTION	8.92563e-05	0.00136983	0.538434	0.37033	1.68682	202	CX3CR1, TREM2, MEFV, HMOX1, LILRA5, FCGR2B, SLC11A1, THBS1, SERPINB1, MERTK, NOD2, PYCARD, LILRB4, IRAK3, HFE, BCL3, VSIG4, TSPO, HGF, FN1, IL10, GPNMB, ACOD1, PDCD1LG2, TYROBP, NPTN, TLR8, TLR4, TNFRSF21, VSIR, TLR6, C5AR2, KLF4, CLEC4A, CMKLR1, ARRB1, EPHB2, GSTP1, NLRP3, BCL6, IDO1, FFAR4, NLRP12, FURIN, GAS6, IL1R2, IL6, TNF, ARG2, LAPTM4B, GBA, ANXA4, RABGEF1, CD274, NDRG2, SYT11, RPS6KA4, P…
GOBP	GOBP_POSITIVE_REGULATION_OF_RNA_SPLICING	8.94874e-05	0.00137165	0.538434	-0.620075	-2.11719	26	SF3B4, SLC38A2, DAZAP1, SRSF5, SETX, NCL, HNRNPLL, DYRK1A, RBMXL1, SNRNP70, TRA2B, ERN1, PRPF19, PRDX6, SNW1, HSPA8
GOBP	GOBP_REGULATION_OF_ENDOTHELIAL_CELL_MIGRATION	9.03055e-05	0.00138246	0.538434	0.428831	1.79765	111	GLUL, HMOX1, NRP1, THBS1, ANXA3, GRN, GATA2, LGMN, PRCP, TEK, SPRED1, SASH1, SEMA4A, VEGFA, KLF4, HIF1A, SPARC, MAP2K3, NOTCH1, RHOB, RIN2, RRAS, CIB1, NRP2, ITGB1BP1, NFE2L2, TNF, ADAM17, PTK2, MIR29A, APOE, PTGS2, PIK3CB, CALR, AKT1, EDN1, NUS1, P2RX4, HSPB1, MET, RHOA, AAMP, EFNA1, SYNJ2BP, ATP5F1B, FGF2, NOS3
bioplanet	bioplanet_Gastrin pathway	9.16277e-05	0.00140095	0.538434	0.609951	2.02778	32	HES1, ITGAV, FOSL1, SERPINE1, JAG1, HGF, MMP9, HBEGF, VEGFA, MYLK, KLF4, S100A6, IER3, CXCL8, SERPINB2, PTGS2, SREBF2, CD44
bioplanet	bioplanet_Collecting duct acid secretion	9.21092e-05	0.00140656	0.538434	0.725784	2.11577	18	ATP6V0D2, ATP6V1A, TCIRG1, ATP6V0D1, ATP6V0A1, ATP6V1D, ATP6V1B2, ATP6V0E1
GOBP	GOBP_FC_RECEPTOR_MEDIATED_STIMULATORY_SIGNALING_PATHWAY	9.33729e-05	0.00142408	0.538434	0.60926	2.02548	32	HCK, FGR, FCGR2B, LYN, SRC, PLSCR1, FCER1G, YES1, PRKCD, PAK1, SYK, RABGEF1, LIMK1, PTK2, MYO1G, PTPRJ, PLD2, VAV3, PLA2G6
GOBP	GOBP_CHLORIDE_TRANSPORT	9.41e-05	0.00142983	0.538434	0.544112	2.03798	54	PTAFR, SLC1A3, TSPO, CLIC1, TTYH3, CLCN5, PCYOX1, BEST1, SLC26A8, TTYH2, ANO8, P2RY6, ANO10, SLC12A9, ANO6, CLDN4, SLC26A10, GLRB, CLCN6, CLCN2
GOBP	GOBP_REGULATION_OF_HISTONE_METHYLATION	9.39479e-05	0.00142983	0.538434	-0.435308	-1.90498	66	GFI1, KANSL2, KANSL1, SIRT1, ZNF274, EHMT2, RIF1, GATA3, KDM4C, NELFA, SMAD4, PAXBP1, KDM3A, PHF1, CHTOP, AUTS2, ZNF304, PAF1, RRP8, NSD1, NSD3, WDR5, MTF2, CTCF, SUV39H1, PAX5, PYGO2, DNMT3B, CTR9, MLLT6, PHF20, PAXIP1, HCFC1, BCOR, SNW1
REACTOME	REACTOME_ADP_SIGNALLING_THROUGH_P2Y_PURINOCEPTOR_1	9.41003e-05	0.00142983	0.538434	0.723434	2.06639	17	GNB4, SRC, GNAQ, GNG11, P2RY1, GNA15, GNB1, GNG5, GNA11, PLA2G4A, GNB2
WP	WP_ENDODERM_DIFFERENTIATION	9.58542e-05	0.00145468	0.538434	-0.389613	-1.81013	96	SESN1, SMAD3, SIAH2, EMSY, TCF7, DUSP2, SP4, RGS10, SMAD2, CAND1, DUSP4, SMAD4, EOMES, TBX21, PIAS1, TNRC6C, SFMBT1, FOXO1, CDC73, NOG, NR3C1, TRERF1, PAF1, ELK4, CUL4B, TOX, AEBP2, FOXN3, APC, DIP2A, CEP250, RFX7, LEF1, MTF2, PHF6, TAF5, TCF4, DNMT3B, BMPR1A, CTR9, BTAF1, EPB41L5
bioplanet	bioplanet_Semaphorin interactions	9.68117e-05	0.00146484	0.538434	0.508666	1.92059	55	MYH14, TREM2, NRP1, FES, TYROBP, PLXNC1, SEMA4A, MYL12B, CFL1, MYL9, RHOB, PAK1, MYH10, RRAS, TLN1, RHOG, CDK5, LIMK2, LIMK1, PLXND1, ARHGEF12, ARHGEF11, PLXNA2, MET, RHOA, DPYSL2, ITGB1
GOBP	GOBP_RIBOSOMAL_LARGE_SUBUNIT_BIOGENESIS	9.68364e-05	0.00146484	0.538434	-0.456106	-1.99053	62	NIP7, RSL1D1, SURF6, MAK16, URB1, LAS1L, DHX30, DDX28, BRIX1, NPM1, GTF3A, SNU13, FASTKD2, ZNF622, ZNHIT3, RPL7L1, RSL24D1, LTO1, FTSJ3, NVL, NOC2L, PAK1IP1, NIFK, RPL5, RPL24, ZNHIT6, GTPBP4, RPL35A, RRP15, WDR74, NOP2, NSA2, RPL35
GOBP	GOBP_VASCULAR_ASSOCIATED_SMOOTH_MUSCLE_CELL_DEVELOPMENT	9.68824e-05	0.00146484	0.538434	0.820487	1.98044	9	ADM, ENG, HES1, VEGFA, COMP, NOTCH1, RAMP2
GOBP	GOBP_GLYCOLYTIC_PROCESS_THROUGH_FRUCTOSE_6_PHOSPHATE	9.74103e-05	0.001471	0.538434	0.751023	2.06782	14	HK3, HK2, ENO1, GALK1, PFKL, HK1, ADPGK, PFKP
GOBP	GOBP_MAINTENANCE_OF_LOCATION_IN_CELL	9.88401e-05	0.00149076	0.538434	0.396137	1.7564	157	S100A9, S100A8, LCN2, HK2, SCIN, NOL3, TMSB10, FKBP1B, TSPO, CCL3, LYN, TPCN2, PRKACA, SLC8A1, GP1BA, SLC8B1, CYBA, FTL, CAPN3, GSTO1, GP9, ERO1A, GAA, GSN, TMEM38B, CALM3, TRPM2, HTT, CHD7, JSRP1, ARHGAP21, CDK5, PSEN1, MCOLN1, KDELR1, RYR1, INSIG1, HK1, P2RY6, FKBP1A, TWF2, CCR5, PTPN6, SRI, TMEM38A, APOE, KDELR2, CALR, AKT1, CEMIP, GPAA1, RER1
bioplanet	bioplanet_Sphingolipid metabolism	0.000100731	0.00151729	0.538434	0.529467	1.93702	49	SPHK1, PSAP, UGCG, SPTLC2, ASAH1, CTSA, ARSB, ACER2, SGMS2, HEXB, ARSD, GLB1, HEXA, GBA, SMPD2, CERS2, PPM1L, ARSA, SMPD3, CERK, SUMF1, GLA, GM2A, SMPD4, NEU1, ACER3, VAPB
GOBP	GOBP_POSITIVE_REGULATION_OF_RESPONSE_TO_BIOTIC_STIMULUS	0.000100847	0.00151729	0.538434	0.4116	1.77246	132	HCK, EMILIN2, NECTIN2, STING1, NOD2, FPR2, PYCARD, CARD9, SPI1, GRN, FCN1, LY96, CLEC7A, COCH, LYN, CD180, SRC, ACOD1, PLSCR1, TYROBP, TLR8, TLR4, NLRC4, SCIMP, SASH1, BMP6, TRIM5, CASP6, CYBA, LILRA2, PAK1, ADAM8, CADM1, SYK, LAMP1, IFI35, CD274, AIM2, IFI16, EREG
bioplanet	bioplanet_Amino sugar and nucleotide sugar metabolism	0.000101645	0.00152742	0.538434	0.581548	2.02479	39	HK3, HK2, RENBP, GALK1, TSTA3, GNPDA1, NPL, UAP1L1, CHIT1, HEXB, GMPPB, CYB5R1, NANS, HEXA, NAGK, HK1, UGDH, UGP2, GALE, GFPT2, GMPPA
GOBP	GOBP_MULTI_MULTICELLULAR_ORGANISM_PROCESS	0.00010191	0.00152953	0.538434	0.420842	1.78713	118	ADM, PTAFR, VDR, CTSB, TIMP1, PZP, P2RX1, FOSL1, LIF, THBD, ACOD1, MMP9, ITGA2, VMP1, VEGFA, IL1B, IDO1, FUT7, GJB2, HEXB, PRDX3, PAM, AGO2, MMP2, SPP1, RGS2, DDR1, PRDM1, ACSL4, SERPINE2, CLDN4, TPPP3, PTGS2, CALR, CAPN2, AKT1, HYAL3, EPN1, EDN1, APOL2, UBE2A, PLA2G6, IGFBP2, HAVCR2, CITED2, ADCY7
GOBP	GOBP_LEUKOCYTE_DIFFERENTIATION	0.000102255	0.00153282	0.538434	0.317157	1.53817	417	BATF, JAG2, CCR2, VNN1, SNX10, TREM2, LGALS3, SBNO2, FCGR2B, TMEM176B, MERTK, TNFAIP6, HLX, LILRB4, SPI1, GATA2, FES, FGL2, CTSL, BCL3, TLR2, NOTCH2, IL18, LIF, LTBR, NFIL3, TRIB1, NFAM1, CCL3, LYN, OSCAR, IL10, SRC, TNFRSF11A, MMP9, MAFB, TYROBP, FCER1G, TCIRG1, SLC46A2, TNFSF13B, TLR4, CCR1, VSIR, PF4, CEBPA, SEMA4A, VEGFA, IL1A, CSF1R, MYB, GAB2, C1QC, CDK6, CEBPB, LOXL3, ANXA2, APP, IL1B, NLR…
GOBP	GOBP_MICROGLIAL_CELL_MEDIATED_CYTOTOXICITY	0.000103035	0.00154262	0.538434	0.934949	1.86895	5	CX3CR1, ITGAM, SPI1, TYROBP
GOBP	GOBP_NEGATIVE_REGULATION_OF_CELL_ACTIVATION	0.000104156	0.00155694	0.538434	0.395036	1.7381	151	CD9, CCR2, FGR, TREM2, HMOX1, LGALS3, FCGR2B, LST1, MERTK, HLX, LILRB4, CD300A, SPI1, LDLR, GRN, FGL2, HFE, CD300LF, VSIG4, LYN, THBD, IL10, GPNMB, PDCD1LG2, TYROBP, TNFRSF21, VSIR, NR1H3, CLEC4G, ALOX12, CEBPB, LOXL3, BCL6, IDO1, PTPN2, PRKCD, ARG2, RABGEF1, CD274, PARP3, SERPINE2, SPN, CD86, SYT11, PTPN6, BTK, APOE
GOBP	GOBP_STEROL_METABOLIC_PROCESS	0.000104245	0.00155694	0.538434	0.434998	1.8058	98	ABCG4, CYP39A1, LDLR, LIPA, SOAT1, G6PD, DGAT2, NPC2, CEBPA, SC5D, RXRA, TTC39B, LPCAT3, SCARF1, APP, PMVK, CYP1B1, CYB5R1, FMO5, OSBPL1A, GBA, ACADVL, INSIG1, FDX1, APOBR, POR, APOE, SREBF2, ABCA1, EPHX2, EBPL, APOL2, CLN8, CAT, HDLBP, NPC1, SREBF1, ACAA2, CYP27A1
HALLMARK	HALLMARK_G2M_CHECKPOINT	0.000104655	0.00155994	0.538434	-0.316382	-1.64896	185	AMD1, SMAD3, ODF2, LBR, STAG1, HNRNPU, RPA2, GSPT1, DMD, RAD21, BUB3, SRSF2, NUMA1, CDKN1B, CDC7, HNRNPD, RBM14, CUL3, PLK4, PTTG1, PDS5B, NCL, CUL1, KPNB1, SFPQ, KIF22, SS18, KPNA2, FOXN3, ODC1, TMPO, XPO1, DBF4, ARID4A, UPF1, UBE2S, ORC6, FANCC, MTF2, CTCF, KMT5A, YTHDC1, ORC5, SUV39H1, CCNT1, KATNA1, PRIM2, TRA2B, RBL1, MAD2L1, POLQ
REACTOME	REACTOME_DISSOLUTION_OF_FIBRIN_CLOT	0.000104701	0.00155994	0.538434	0.818672	1.97606	9	PLAU, PLAUR, SERPINE1, ANXA2, SERPINB8, SERPINE2, SERPINB2, S100A10
GOBP	GOBP_REGULATION_OF_RESPONSE_TO_WOUNDING	0.000104952	0.00156179	0.538434	0.441559	1.835	102	ALOX5, CD9, TFPI, PLAU, THBS1, GRN, CLEC7A, FKBP1B, SERPINE1, THBD, IL10, HBEGF, CD36, MYLK, KLF4, ALOX12, F3, SCARF1, EPHB2, GP1BA, PRKCD, CD109, ACTG1, SPP1, NFE2L2, TNF, PROS1, PTK2, SERPINE2, ADTRP, SERPING1, CERS2, ST3GAL4, MIR29A, APOE, SERPINB2, ANO6, CLDN4, EDN1, CLASP2, CRK, STK24, ITGB1, VIL1, FGF2, ADAMTS18, NOS3, MAP2K1, DMTN, KREMEN1, ATP7A, ANXA1, CLDN3, SH2B3, MTOR, MMRN1
GOBP	GOBP_NUCLEOSOME_ASSEMBLY	0.000105863	0.00157343	0.538434	-0.475562	-1.99097	52	BRD2, SMARCA5, TSPYL2, NAP1L2, TSPYL1, HJURP, KAT6A, SPTY2D1, TSPYL4, CHRAC1, GRWD1, NPM1, ASF1A, SART3, KAT6B, NAP1L5, CENPP, POLE3, DNAJC9, TSPYL5, SHPRH
GOBP	GOBP_INTESTINAL_LIPID_ABSORPTION	0.000107397	0.00159236	0.538434	0.877484	1.9413	7	UGCG, LDLR, CD36, AKR1C1, LPCAT3
GOBP	GOBP_NUCLEOSIDE_DIPHOSPHATE_METABOLIC_PROCESS	0.000107289	0.00159236	0.538434	0.434825	1.80509	98	HK3, HK2, ENTPD1, ENO1, GALK1, SLC2A6, TREX1, HIF1A, AK4, LDHA, APP, GAPDH, PGAM1, TPI1, PGK1, ENTPD3, PSEN1, NUDT16, PFKL, INSR, HK1, MLXIPL, NCOR1, GUK1, STAT3, MPP1, ADPGK, PFKP, MAGI3, BAD, NUDT9, HDAC4, AK2, ARL2, OGDH, ENTPD2, NUDT5, NME3, NME2, ZBTB7A, PGM1, SIRT6, AK3
GOBP	GOBP_NEGATIVE_REGULATION_OF_CALCIUM_ION_TRANSMEMBRANE_TRANSPORT	0.000107762	0.00159584	0.538434	0.674292	2.07421	23	FKBP1B, GEM, GPR35, YWHAE, CBARP, GSTO1, CALM3, SESTD1, VDAC1, FKBP1A, SRI
bioplanet	bioplanet_Iron uptake and transport	0.000108003	0.00159747	0.538434	0.625917	2.03414	29	STEAP3, HMOX1, SLC46A1, ATP6V0D2, CYBRD1, ATP6V1A, TCIRG1, ATP6V0D1, ATP6V0A1, FTL, ATP6V1D, ATP6V1B2, MCOLN1, ATP6V0E1
REACTOME	REACTOME_TP53_REGULATES_TRANSCRIPTION_OF_CELL_CYCLE_GENES	0.000110536	0.00163298	0.538434	-0.504996	-2.0414	45	CNOT8, GADD45A, CNOT6L, RGCC, RBL2, PLK2, CDKN1B, CNOT2, CENPJ, CNOT1, PCNA, CNOT7, NPM1, BTG2, CNOT6, TP53, CNOT4, PLK3
bioplanet	bioplanet_Respiratory electron transport, ATP biosynthesis by chemiosmotic coupling, and heat production by uncoupling proteins	0.000111222	0.00164112	0.538434	0.520148	1.91519	52	NDUFS8, COX6B1, NDUFV2, NDUFB7, COX4I1, NDUFB2, NDUFS6, NDUFA8, NDUFS3, UQCRH, SDHC, NDUFB11, COX5A, NDUFV1, NDUFB3, NDUFB8, COX8A, NDUFA9, NDUFS7, UQCRB, NDUFC2, NDUFA10, UCP2, NDUFAB1, UQCRC1, COX7B, NDUFB5, COX6C, NDUFS4, NDUFS1, ETFB, NDUFB10, NDUFA6, UQCRC2, NDUFV3, ETFDH, NDUFA1, NDUFA12, ETFA
REACTOME	REACTOME_MHC_CLASS_II_ANTIGEN_PRESENTATION	0.000111362	0.00164117	0.538434	0.454178	1.85725	88	CTSD, CTSB, CTSC, CTSL, AP2A1, LGMN, IFI30, CTSS, TUBB1, DNM1, CTSA, CAPZB, DYNC1H1, TUBA8, AP1B1, OSBPL1A, SEC24D, AP1S2, DCTN2, AP2M1, TUBB6, AP2S1, CANX, AP2A2, CTSH, CTSO, CAPZA2, KIF23, AP2B1, DYNC1LI1, SPTBN2, DCTN4, CLTC, CD74, KIF3B, ACTR1A
GOBP	GOBP_REGULATION_OF_SUPEROXIDE_METABOLIC_PROCESS	0.000111493	0.00164117	0.538434	0.656059	2.05745	24	FPR2, ITGAM, CLEC7A, TYROBP, CD36, GSTP1, CYBA, PRKCD, SYK, NFE2L2, ITGB2, CD177
PID	PID_ARF6_PATHWAY	0.000111863	0.0016426	0.538434	0.63661	2.03883	26	HGF, SRC, ITGA2B, PXN, GNAQ, ARRB1, GNA15, ADAP1, ADRB2, GNA11, KIF13B, ARRB2, CYTH3, MET, EFNA1, CYTH2
bioplanet	bioplanet_Arf6 signal transduction regulation	0.000111863	0.0016426	0.538434	0.63661	2.03883	26	HGF, SRC, ITGA2B, PXN, GNAQ, ARRB1, GNA15, ADAP1, ADRB2, GNA11, KIF13B, ARRB2, CYTH3, MET, EFNA1, CYTH2
GOBP	GOBP_PROTON_TRANSMEMBRANE_TRANSPORT	0.000111993	0.0016426	0.538434	0.442541	1.8315	99	SLC47A1, SLC46A1, ATP6V0D2, ATP6V1A, TCIRG1, ATP6V0D1, COX6B1, CLCN5, SLC15A3, PPIF, SLC9A8, ANTKMT, ATP6V1B2, COX4I1, ATP6V0E1, ATP5F1E, ATP5F1D, SLC22A18, ATP1A1, UQCRH, SURF1, SLC36A1, COX5A, SLC9A1, TMCO3, ATP5MG, ATP5PO, COX8A, COX17, NDUFS7, ATP6V1H, ATP5F1B, PARK7, SLC11A2, ATP5PB, ATP7A, ACTN4, ATP5PD, ATPSCKMT, SLC9B2, SLC17A5, SLC25A22, SLC4A10, UCP2, UQCRC1, COX7B, COX7A1
GOBP	GOBP_TEMPERATURE_HOMEOSTASIS	0.000112625	0.0016499	0.538434	0.409879	1.75616	125	PTGES, CCR2, LCN2, GRB10, ALDH1A1, G0S2, IL18, GATM, ACSL1, TNFRSF11A, TLR4, CD36, NR1H3, VEGFA, IL1A, ZNF516, CMKLR1, CEBPB, IL1B, DOCK7, FFAR4, NOTCH1, ADRB2, DYNC1H1, GADD45G, FABP5, TRPM2, SYK, PLAC8, GPX1, TNF, ADAM17, PPARGC1B, ACADVL, STAT3, TFE3, DECR1, PTGS2, BSCL2, PCTP
GOBP	GOBP_REGULATION_OF_SUPEROXIDE_ANION_GENERATION	0.000113104	0.00165493	0.538434	0.712868	2.09308	19	FPR2, ITGAM, CLEC7A, TYROBP, GSTP1, CYBA, PRKCD, SYK, ITGB2, CD177
GOBP	GOBP_RESPIRATORY_ELECTRON_TRANSPORT_CHAIN	0.000113241	0.00165496	0.538434	0.465523	1.83883	76	NDUFS8, SOD2, PLEC, NDUFV2, NDUFB7, COX4I1, GBA, NDUFB2, NDUFS6, NDUFA8, NDUFS3, UQCRH, SDHC, COX5A, BID, NDUFV1, AIFM2, NDUFB3, NDUFB8, NDUFA9, NDUFS7, PARK7, UQCRB, NDUFC2, NDUFA10, SLC25A22, NDUFAB1, NDUFB5, COX7A1, GPD2, DNAJC15, GHITM, MYBBP1A, NDUFS4, NDUFS1, ETFB, GPD1, NDUFB10, COX15, SLC25A13, SLC25A18, NDUFA6, CHCHD2, NDUFV3, SLC25A12, ETFDH, POLG2, NDUFA1, NDUFA12, ETFA
REACTOME	REACTOME_METABOLISM_OF_LIPIDS	0.000113771	0.00166073	0.538434	0.300528	1.47979	530	ALOX5, PTGES, ALDH3B1, TNFAIP8L3, TBXAS1, PLBD1, SPTSSA, ALOX5AP, SPHK1, VDR, PSAP, UGCG, CYP39A1, PLD1, HACD4, LGMN, G0S2, SPTLC2, ASAH1, B4GALNT1, TSPO, PCYT1A, ACSL1, PLA2G15, DGAT2, ABCC3, CD36, LPCAT2, CTSA, TNFRSF21, ARSB, NR1H3, LTA4H, AKR1C1, CBR1, SC5D, RXRA, ELOVL7, ACAD10, ALOX12, PRKACA, BMX, LPCAT3, DBI, PMVK, ACER2, CYP1B1, PPT1, ESRRA, AGPAT2, SGMS2, HEXB, SRD5A3, RAB4A, ACOT8, ARS…
GOBP	GOBP_REGULATION_OF_LIPASE_ACTIVITY	0.000114274	0.0016641	0.538434	0.527768	1.93081	49	PTAFR, RASGRP4, PCSK6, LRP1, C5AR1, P2RY12, ANG, NR1H3, GNAQ, SORT1, ARHGAP6, GNA15, PPT1, FURIN, RGS2, P2RY6, CD86, PLCB2, POR, ABHD5
GOBP	GOBP_SMOOTH_MUSCLE_CELL_MIGRATION	0.000114274	0.0016641	0.538434	0.528082	1.93195	49	PLAU, GRB10, NRP1, DOCK4, AIF1, LRP1, SERPINE1, DOCK5, TRIB1, SRC, TLR4, ITGA2, DOCK7, CYP1B1, NFE2L2, DDR1, CORO1B, P2RY6, S100A11, RHOA, AAMP, CRK, S1PR2
WP	WP_CCL18_SIGNALING_PATHWAY	0.00011513	0.00167458	0.538434	0.672446	2.06853	23	FN1, MMP9, VMP1, HIF1A, AK4, LDHA, ZEB2, VIM, MMP2, ATF3, MTDH, SNAI1, CD44
GOBP	GOBP_POSITIVE_REGULATION_OF_STRESS_ACTIVATED_PROTEIN_KINASE_SIGNALING_CASCADE	0.000115364	0.001676	0.538434	0.44258	1.83649	97	FCGR2B, SPHK1, NOD2, PYCARD, CARD9, SPI1, CLEC7A, NAIP, LTBR, LYN, SDCBP, TLR4, SCIMP, SASH1, VEGFA, MAP3K11, PLCB1, IL1A, STK3, NCF1, APP, IL1B, MYD88, MTURN, GADD45G, TNF, MAPK8IP3, RNF13, DIXDC1, RIPK2, IGFBP6, TAOK3
WP	WP_PROSTAGLANDIN_AND_LEUKOTRIENE_METABOLISM_IN_SENESCENCE	0.000116972	0.00169734	0.538434	0.671295	2.06499	23	ALOX5, PTGES, TBXAS1, ALOX5AP, MAPK11, PTGER2, GNAQ, PLCB1, LTA4H, ALOX12, CDKN1A, PTGDS, PLA2G4A, PTGS2, GNAI1
GOBP	GOBP_SUBSTRATE_ADHESION_DEPENDENT_CELL_SPREADING	0.000119247	0.0017283	0.538434	0.479655	1.87638	73	NRP1, BVES, MERTK, ITGAV, DAB2, LAMC1, TEK, DOCK5, FN1, SRC, PXN, CORO1C, MEGF9, FERMT3, LAMB2, CIB1, LPXN, ITGB1BP1, PARVG, PTK2, MICALL2, ILK, LAMB3, CALR, AKIP1, P4HB, LIMS2, SRGAP2, S100A10, ARPC2, RHOA, UNC13D, CRK, EFNA1
GOBP	GOBP_REGULATION_OF_DNA_TEMPLATED_TRANSCRIPTION_ELONGATION	0.000120391	0.00174282	0.538434	-0.475683	-1.98486	51	SCAF8, ZMYND11, HNRNPU, CDK13, TCEA2, HEXIM1, KAT7, NELFA, AXIN1, CDC73, TSFM, CBX7, CCAR2, CCNT2, CCNK, NELFCD, LDB1, CCNT1, SUPT16H, EAPP, ERCC6, SUPT4H1
GOBP	GOBP_POSITIVE_REGULATION_OF_ENDOTHELIAL_CELL_MIGRATION	0.000120869	0.00174768	0.538434	0.478673	1.87254	73	HMOX1, NRP1, THBS1, ANXA3, GRN, GATA2, LGMN, TEK, SASH1, VEGFA, HIF1A, SPARC, MAP2K3, RHOB, RIN2, RRAS, CIB1, NRP2, ITGB1BP1, NFE2L2, ADAM17, MIR29A, PTGS2, PIK3CB, CALR, AKT1, EDN1, NUS1, P2RX4, HSPB1, MET, AAMP, ATP5F1B, FGF2, NOS3
REACTOME	REACTOME_RRNA_PROCESSING	0.000122294	0.0017662	0.518848	-0.318932	-1.631	171	RIOK2, NIP7, THUMPD1, ERI1, LAS1L, TEX10, UTP14C, RPP38, NOL11, UTP4, MTERF4, ISG20L2, IMP3, SNU13, EXOSC9, NCL, EXOSC4, UTP18, TRMT10C, BMS1, RPS20, UTP15, NAT10, TSR1, EXOSC8, PWP2, RPP21, RPL22L1, EXOSC2, WDR75, FCF1, MRM3, NOL6, DIS3, RPS6, FTSJ3, EXOSC3, NOB1, RPP14, WDR3, DDX47, RPS29, EXOSC10, RPL5, RPSA, UTP6, RPL15, RPL24, RIOK1, RPS3, WDR46, RPL13, WDR43, MPHOSPH10, RPL35A, RPL32, NOP14…
GOBP	GOBP_RESPONSE_TO_MECHANICAL_STIMULUS	0.000123918	0.00178754	0.518848	0.404102	1.74329	133	TLR5, ENG, TNFRSF8, THBS1, SLC1A3, TNFRSF1A, RETN, FOSL1, CASP1, TMEM150C, LTBR, TIFAB, KCNQ1, SRC, TLR8, TLR4, ITGA2, BMP6, SLC8A1, IL1B, CYBA, P2RY1, LRP11, MYD88, TNFRSF10A, GSN, ACTA1, PLEC, KCNJ2, MMP2, HTT, ACTG1, PPL, TNF, PTK2, BAG3, SERPINE2, PIEZO1, PTGS2, MTPN, MAPK3, BAD, EDN1, CASP5, SLC9A1, IGFBP2, CLCN6, TNFRSF10B, CITED2, RHOA, TNFSF14, PKD1L3, BACE1, MPO
bioplanet	bioplanet_Non-coding RNA metabolism	0.000125118	0.00180274	0.518848	-0.518864	-2.06242	41	PHAX, NUP107, NUP160, NUP43, DDX20, RAE1, NUP54, NUP35, GEMIN5, NUP88, SNRPB, SMN1, NUP155, SNUPN, RANBP2, NUP62, NUP133, NUP210, GEMIN4, PRMT5
GOBP	GOBP_REGULATION_OF_NERVOUS_SYSTEM_PROCESS	0.000125911	0.00181035	0.518848	0.48317	1.89248	72	PTAFR, BAIAP2, CTSC, NPTX2, HGF, CCL3, IL10, SRC, TNFRSF1B, UNC13B, ITGA2, TNFRSF21, IL1A, GPR35, APP, STX1A, ACP3, ADRB2, MGLL, FABP5, ITGAX, TNF, GBA, PARD3, EGR2
REACTOME	REACTOME_FCGAMMA_RECEPTOR_FCGR_DEPENDENT_PHAGOCYTOSIS	0.00012609	0.00181035	0.518848	0.483628	1.90091	74	FCGR1A, HCK, CYFIP1, FGR, PLD1, BAIAP2, LYN, SRC, YES1, BRK1, ARPC3, CFL1, PRKCD, PAK1, SYK, NCKAP1, ACTG1, LIMK1, PTK2, MYO10, BTK, PLD2, VAV3, MAPK3, PIK3CB, MYO1C, ACTB, PLA2G6, ARPC2, MYO5A, PLPP5, NCKAP1L, CRK
bioplanet	bioplanet_Interferon-gamma signaling pathway	0.00012609	0.00181035	0.518848	0.480243	1.86329	68	PTAFR, FCGR1A, DAPK1, IFNGR2, IFI30, CASP1, PTPN1, MAP3K11, MT2A, CEBPB, IFNGR1, IRF5, IL1B, CISH, PTPN2, ICAM1, PRKCD, CALM3, PTGES2, PTPN6, STAT3, NCAM1, MAPK3, OAS1, CD44, AKT1, RAP1A
GOBP	GOBP_TRANSITION_METAL_ION_TRANSPORT	0.000127359	0.00182642	0.518848	0.477033	1.86612	73	STEAP3, LCN2, SLC31A1, SLC31A2, SLC11A1, SLC46A1, CYBRD1, SLC39A4, HFE, SLC39A1, SLC25A37, FLVCR2, SLC6A9, ATP2C1, FTL, STEAP4, TRPM2, MCOLN1, SLC30A1, ATOX1, TMEM165, LMTK2, COX17, SLC11A2, ABCB7, SLC39A6, CLTC, SLC40A1, NECTIN1, ATP7A, FTH1, SLC39A3, ATP13A1
GOBP	GOBP_ICOSANOID_BIOSYNTHETIC_PROCESS	0.000127882	0.00183179	0.518848	0.608392	1.99655	30	ALOX5, PTGES, TBXAS1, ALOX5AP, DAGLB, MGST2, LTA4H, CBR1, IL1B, MGST3, PTGDS, PTGES2, FABP5, SYK, GGT5, PLA2G4A, PTGS2, EDN1, FADS1, PRXL2B
GOBP	GOBP_PROTEIN_ACTIVATION_CASCADE	0.000128184	0.00183396	0.518848	0.812996	1.96236	9	F13A1, PRCP, FN1, GP1BA, GP9
GOBP	GOBP_VACUOLAR_ACIDIFICATION	0.0001284	0.00183491	0.518848	0.689151	2.06034	20	DMXL2, SLC11A1, ATP6V0D2, GRN, TCIRG1, ATP6V0D1, ATP6V0A1, PPT1, ATP6V0E1, ATP6AP2
GOBP	GOBP_NEGATIVE_REGULATION_OF_CELL_CYCLE_PHASE_TRANSITION	0.0001301	0.00185704	0.518848	-0.300765	-1.58251	201	XPC, WAC, SYF2, BTN2A2, USP47, ZFP36L2, JADE1, RGCC, RBL2, PLK2, RPA2, NSUN2, APBB1, MRE11, RAD21, BUB3, ZW10, CDKN1B, APBB2, BLM, EME1, ETAA1, UIMC1, CDC5L, CDC73, CTDSP2, FBXO7, CCAR2, PCID2, SDE2, HINFP, ZNF830, RFWD3, ZNF207, MAD2L1BP, CCNG1, TP53, FOXN3, ATM, CRY1, APC, GIGYF2, PLK3, RAD9A, NABP1, MYO16, TRIAP1, MSH2, FZR1, CDK5RAP2, BRSK1, FHL1, ATF2, INTS7, RAD17, ERCC6, TOPBP1, FBXO31, MD…
bioplanet	bioplanet_Chagas disease	0.000131024	0.00186772	0.518848	0.466532	1.88208	85	TNFRSF1A, IFNGR2, MAPK11, CCL2, TLR2, SERPINE1, CCL3, IL10, TLR4, C1QB, GNAQ, TLR6, PLCB1, C1QC, IFNGR1, IL1B, GNA15, MYD88, TICAM1, C3, TGFBR1, PPP2CB, IL6, TNF, GNA11, CXCL8, PLCB2, MAPK3, PIK3CB, CALR, AKT1, PLCB3, GNAI1
GOBP	GOBP_HISTONE_H3_ACETYLATION	0.000131154	0.00186772	0.518848	-0.43026	-1.88288	66	BRPF3, NAP1L2, JADE2, PBXIP1, SIRT1, JADE1, KAT14, KAT6A, TADA1, GATA3, KAT7, MAP3K7, SMAD4, PER1, JADE3, TAF5L, KAT6B, CRTC2, TAF7, WDR5, LEF1, POLE3, SGF29, LDB1, TAF5, TAF6L, BRPF1, TAF2, YEATS2, ING5, ZNF451
bioplanet	bioplanet_RNA polymerase II transcription	0.00013285	0.00188968	0.518848	-0.394907	-1.82192	88	ZNF473, TAF1, CPSF7, SRSF6, SRSF2, NELFA, TBP, POLR2D, CLP1, NUDT21, SRSF5, CSTF1, CSTF3, PAPOLA, SRRM1, NFX1, CCNT2, TAF11, RBM8A, NELFCD, CDK7, CCNT1, POLR2C, TAF5, SUPT16H, POLR2B, SNRPB, SUPT4H1, GTF2H2, RNGTT, CDK9, GTF2B, UPF3B, ALYREF, CCNH, ERCC3, GTF2H1
GOBP	GOBP_CENTRAL_NERVOUS_SYSTEM_DEVELOPMENT	0.000133291	0.00189376	0.518848	0.291453	1.44557	603	CLU, ZFHX3, NRG1, WLS, CX3CR1, S100A9, AATK, TREM2, S100A8, FCGR2B, SPHK1, NRP1, FPR2, ANXA3, ITGAM, LDLR, GRN, GNB4, AIF1, PGAP1, HES1, GATA2, BAIAP2, SCIN, LRP1, TLR2, PLXNB2, LIF, VCAN, B4GALT5, LYN, NRGN, G6PD, MARCKS, SRC, C5AR1, MAFB, TYROBP, DPCD, TNFRSF1B, P2RY12, CAPG, TLR4, TNFRSF21, ARSB, ATP6V0D1, COX6B1, PLCB1, CSF1R, PFKFB3, XRN2, STK3, APLP2, CDK6, HIF1A, YWHAE, GRIN2C, GFAP, LOXL3…
GOBP	GOBP_POSITIVE_REGULATION_OF_HYDROGEN_PEROXIDE_METABOLIC_PROCESS	0.000133721	0.00189766	0.518848	0.974324	1.61731	3	SOD2, ZNF205
GOBP	GOBP_HORMONE_TRANSPORT	0.000134056	0.00190021	0.518848	0.374161	1.66947	166	ADM, ALOX5, TRPM4, NIBAN2, GLUL, OSM, RETN, ICA1, HFE, DAB2, FKBP1B, LIF, GPR27, LYN, KCNQ1, IL1RN, TCIRG1, BRSK2, SLCO4A1, HIF1A, BMP6, TCF7L2, RAB11FIP5, STX1A, SLC7A8, IL1B, SLC8B1, P2RY1, PIM3, FFAR4, TRPM2, KLF7, RAB11FIP1, CHD7, IL6, SPP1, TNF, PFKL, ACSL4, SRI, BTK, MAFA, PCK2, SMPD3, BAD, EDN1, SIDT2, PLA2G6
GOBP	GOBP_DNA_TEMPLATED_TRANSCRIPTION_INITIATION	0.000134712	0.00190731	0.518848	-0.377644	-1.80139	101	MED23, SMARCA5, BCLAF1, MED17, TAF1, PPM1D, GTF3C5, SNAPC5, CAND1, BRF2, TBP, MED13, NCOA6, POLR2D, TFAM, UBTF, MED4, TBPL1, TAF8, GTF3C4, ATF7IP, SETX, THRA, TP53, TAF11, TAF7, JUN, BRF1, CDK7, TAF5, ERCC6, TAF9B, GTF2H2, TAF6L, MED12, TAF2, TAF1C, H4C2, TAF3, CDK9, ZNF451, PAXIP1, GTF2B, CCNH, ERCC3, MED30
WP	WP_FERROPTOSIS	0.000134994	0.00190908	0.518848	0.516796	1.90285	52	STEAP3, HMOX1, CYBB, ACSL1, CTH, AKR1C1, ATG7, LPCAT3, FTL, SAT1, MAP1LC3A, DPP4, ACSL4, SLC1A5, POR, TXNRD1, VDAC2, SLC7A11, CHMP6, ACSL5, HSPB1, AIFM2, GCLM, SLC11A2, CHMP5, SLC40A1, FTH1, BACH1
GOBP	GOBP_COMPLEMENT_RECEPTOR_MEDIATED_SIGNALING_PATHWAY	0.000135227	0.00191018	0.518848	0.820497	2.05657	10	FPR3, FPR1, FPR2, C5AR1, C3AR1, C5AR2, CMKLR1
GOBP	GOBP_T_CELL_RECEPTOR_SIGNALING_PATHWAY	0.000135649	0.00191394	0.518848	-0.386483	-1.80583	97	ELF1, CD226, FCHO1, BTN2A2, IKBKB, PDE4B, PDE4D, BCL10, ITK, DGKZ, CCR7, GATA3, MAP3K7, CD247, PIK3CA, CTLA4, THEMIS, CD28, PIK3CD, TESPA1, PTPN22, KCNN4, FYN, RFTN1, CD8A, SKAP1, PRKD2, RC3H2, UBASH3A, ZAP70, BTN3A3, INPP5D, CARD11, EIF2B5, STK11
REACTOME	REACTOME_TOLL_LIKE_RECEPTOR_TLR1_TLR2_CASCADE	0.000136227	0.00191988	0.518848	0.443864	1.80887	89	S100A12, S100A9, TNIP2, S100A8, NOD2, MAPK11, IRAK3, LY96, DUSP6, TLR2, CD14, TLR4, CD36, TLR6, TLR1, MAP3K8, APP, MAP2K3, MAPKAPK3, MYD88, PPP2CB, MAPKAPK2, PELI3
PID	PID_INTEGRIN1_PATHWAY	0.000136582	0.00192046	0.518848	0.587945	2.00188	37	F13A1, PLAU, PLAUR, THBS1, ITGAV, LAMC1, CD14, FN1, ITGA2, VEGFA, TGFBI, ITGA9, LAMB2, SPP1, TGM2, LAMB3, CD81, ITGB1, ITGA5
bioplanet	bioplanet_Beta-1 integrin cell surface interactions	0.000136582	0.00192046	0.518848	0.587945	2.00188	37	F13A1, PLAU, PLAUR, THBS1, ITGAV, LAMC1, CD14, FN1, ITGA2, VEGFA, TGFBI, ITGA9, LAMB2, SPP1, TGM2, LAMB3, CD81, ITGB1, ITGA5
KEGG	KEGG_NOD_LIKE_RECEPTOR_SIGNALING_PATHWAY	0.000137562	0.00193202	0.518848	0.512698	1.903	53	MEFV, NOD2, PYCARD, CARD9, CXCL1, MAPK11, CCL2, NAIP, CASP1, IL18, CCL8, NLRC4, CCL7, IL1B, NLRP3, CARD6, IL6, TNF, CXCL8, MAPK3, RIPK2, NLRP1, CASP5
GOBP	GOBP_VASCULAR_TRANSPORT	0.000140742	0.00197442	0.518848	0.502044	1.89558	55	ABCC4, SLC1A3, LRP1, ABCC3, CD36, SLCO2B1, SLC6A6, SLC6A9, SLC24A3, SLC7A8, ABCC1, SLC1A2, FABP5, INSR, SLC1A5, APOE, SLCO3A1, MFSD2A, SLC27A4, ABCC2, SLC7A5
GOBP	GOBP_TOLL_LIKE_RECEPTOR_2_SIGNALING_PATHWAY	0.000142547	0.00199745	0.518848	0.709752	2.02731	17	TNIP2, TREM2, NOD2, TLR2, LYN, ACOD1, TLR6, TLR1, PIK3AP1, CYBA
GOBP	GOBP_ELECTRON_TRANSPORT_CHAIN	0.00014471	0.00202191	0.518848	0.42127	1.77647	113	NDUFS8, SOD2, NCF2, NQO2, CYBB, NCF1, CYBA, IDO1, STEAP4, PLEC, NDUFV2, NDUFB7, COX4I1, GBA, NDUFB2, FDX1, NDUFS6, NDUFA8, POR, NDUFS3, UQCRH, SDHC, P4HA2, GSR, SURF1, COX5A, BID, NDUFV1, GLRX2, AIFM2, NDUFB3, NDUFB8, NDUFA9, NDUFS7, PARK7, AKR7A2, ASPH, UQCRB, NDUFC2, NDUFA10, SLC25A22, NDUFAB1, NDUFB5, COX7A1, GPD2, DNAJC15, GHITM, MYBBP1A, NDUFS4, NDUFS1, ETFB, GPD1, ADH5, NDUFB10, COX15, SLC2…
GOBP	GOBP_RESPONSE_TO_DIACYL_BACTERIAL_LIPOPEPTIDE	0.000144631	0.00202191	0.518848	0.955665	1.76492	4	TLR2, CD14, CD36, TLR6
WP	WP_MYOMETRIAL_RELAXATION_AND_CONTRACTION_PATHWAYS	0.000144788	0.00202191	0.518848	0.422082	1.75895	108	ADM, RGS18, GNB4, IGFBP4, GUCY1A1, PRKAR2B, GNAQ, ATP2A2, RGS17, YWHAE, PRKACA, RGS19, ARRB1, PLCD1, ETS2, SLC8A1, GNG11, IL1B, ADCY4, GSTO1, PRKCD, ACTA1, CALM3, YWHAB, GNB1, IL6, ACTG1, ATF3, RGS2, RAMP2, GNG5, RYR1, GNB2, CREB3, SFN, PLCB3, IGFBP6, ACTB, MYL4, RAMP1, ARRB2, GRK6, IGFBP2, ADCY7
HALLMARK	HALLMARK_ESTROGEN_RESPONSE_LATE	0.000145348	0.00202743	0.518848	0.402791	1.75512	140	BATF, CD9, S100A9, PTGES, ALDH3B1, SNX10, SERPINA1, RAB31, PAPSS2, IGFBP4, BLVRB, PRKAR2B, MYOF, UNC13B, OLFM1, MYB, WFS1, KLF4, SLC24A3, SGK1, FARP1, CISH, SORD, ABHD2, CXCL14, FABP5, PPIF, TFPI2, PDZK1, IMPA2, ALDH3A2, TST, PTPN6, UGDH, SLC2A8, CD44, SFN, GALE, CKB, KCNK5, ST6GALNAC2, ACOX2, SLC7A5, NCOR2, GLA, RPS6KA2, LARGE1, DNAJC1, AREG, ITPK1, FGFR3, SCNN1A, HSPA4L, SERPINA5, CCND1, AFF1, …
GOBP	GOBP_MACROPHAGE_DIFFERENTIATION	0.000147624	0.0020565	0.518848	0.573126	1.97024	38	SPI1, GATA2, TLR2, LIF, TRIB1, MMP9, PF4, CEBPA, VEGFA, CSF1R, C1QC, APP, PTPN2, HCLS1, GBA
KEGG	KEGG_VIBRIO_CHOLERAE_INFECTION	0.000147769	0.0020565	0.518848	0.576458	2.00707	39	ATP6V0D2, KCNQ1, ATP6V1A, TCIRG1, ATP6V0D1, PRKACA, ATP6V0A1, ERO1A, ATP6V1D, ATP6AP1, ACTG1, ATP6V1B2, KDELR1, ATP6V0E1, PDIA4, KDELR2, SEC61B, ACTB, SEC61A1
GOBP	GOBP_DENDRITIC_CELL_DIFFERENTIATION	0.000148761	0.00206796	0.518848	0.614541	2.02802	31	BATF, TREM2, LGALS3, FCGR2B, TMEM176B, SPI1, NOTCH2, LTBR, LYN, CEBPB, GAS6, BATF3, TRPM2, PSEN1
KEGG	KEGG_PARKINSONS_DISEASE	0.00015167	0.00210602	0.518848	0.463427	1.86955	85	NDUFS8, SEPTIN5, COX6B1, APAF1, SLC18A2, NDUFV2, NDUFB7, COX4I1, VDAC1, NDUFB2, NDUFS6, ATP5F1E, ATP5F1D, NDUFA8, NDUFS3, UQCRH, SDHC, VDAC2, COX5A, NDUFV1, NDUFB3, NDUFB8, ATP5PO, COX8A, NDUFA9, NDUFS7, ATP5F1B, PARK7, CASP9, ATP5PB, UQCRB, NDUFC2, LRRK2, NDUFA10, ATP5PD, UBE2J2, NDUFAB1, UBE2L6, UQCRC1, COX7B, NDUFB5, COX7A1, COX6C, NDUFS4, NDUFS1, UBE2L3, NDUFB10, HTRA2, NDUFA6, UQCRC2, COX7A2…
GOBP	GOBP_REGULATION_OF_AMYLOID_FIBRIL_FORMATION	0.000152351	0.00211308	0.518848	0.799911	2.05617	11	CLU, TREM2, LDLR, APP, PFDN6, PSEN1, APOE
GOBP	GOBP_PEPTIDYL_LYSINE_METHYLATION	0.000153331	0.00212426	0.518848	-0.371333	-1.81814	115	METTL18, NFYA, GFI1, KANSL2, KANSL1, SIRT1, ZNF274, EHMT2, RIF1, SMYD5, GATA3, KDM4C, NELFA, SMAD4, EZH1, KDM3A, SETD4, PHF1, CSKMT, N6AMT1, AUTS2, ZNF304, WDR82, SETD2, RLF, NSD1, SUV39H2, ARID4A, NSD3, WDR5, NFYB, MTF2, KMT5A, SUV39H1, PAX5, PYGO2, SETDB2, DNMT3B, EHMT1, CTR9, MLLT6, PHF20, NSD2, CXXC1, SMYD3, KMT2B, PAXIP1, HCFC1, RBBP5, BCOR, SNW1, SETD6, KMT5B, KDM6A, MEN1, KMT2E
GOBP	GOBP_RESPONSE_TO_LIPOTEICHOIC_ACID	0.000153625	0.00212593	0.518848	0.809095	1.95294	9	TREM2, TLR2, CD14, TLR4, CD36, RIPK2
GOBP	GOBP_POSITIVE_REGULATION_OF_INTERLEUKIN_8_PRODUCTION	0.000153903	0.00212624	0.518848	0.541959	1.95001	45	TLR5, NOD2, PYCARD, FCN1, CLEC7A, TLR2, SERPINE1, CD14, TLR8, TLR4, TLR1, F3, IL1B, LILRA2, MYD88, SYK, IL6, TNF, STAT3, CD58, DDX58, LAMTOR5, PARK7, RIPK1, CD74
GOBP	GOBP_POSITIVE_REGULATION_OF_PEPTIDYL_TYROSINE_PHOSPHORYLATION	0.000153995	0.00212624	0.518848	0.415042	1.76249	118	NRG1, FCGR1A, TREM2, LILRA5, NRP1, OSM, NOD2, TNFRSF1A, HES1, CLEC7A, IL18, LIF, HGF, LYN, SRC, PTPN1, HBEGF, CD36, VEGFA, CSF1R, BMP6, YES1, NCF1, GPRC5B, GAS6, ENPP2, TNK2, SYK, HCLS1, EHD4, IL6, TNF, ADAM17, ACVR1, EREG, PTPRJ, CD44, RIPK2, TEC, ARRB2, CD81, CD4, EFNA1, ITGA5, LRP8, IL15, TNFRSF18
GOBP	GOBP_CELLULAR_DEFENSE_RESPONSE	0.000155902	0.00215015	0.518848	0.577323	1.95726	36	CX3CR1, CCR2, CD300C, NCF2, LY96, FOSL1, C5AR1, TYROBP, TCIRG1, ADORA2B, CD5L, NCF1, LGALS3BP, NCR1, SPN, CCR5
GOBP	GOBP_TOLL_LIKE_RECEPTOR_SIGNALING_PATHWAY	0.000158163	0.00217887	0.518848	0.436666	1.81195	97	TLR5, TNIP2, TREM2, NOD2, CD300A, IRAK3, LY96, CD300LF, TLR2, CD14, CTSS, FLOT1, LYN, ACOD1, TLR8, TLR4, CD36, SCIMP, NR1H3, TLR6, TLR1, PIK3AP1, UNC93B1, CYBA, LILRA2, MAPKAPK3, MYD88, TICAM1, MAPKAPK2, RTN4, TNF, IFI35
GOBP	GOBP_NOTCH_SIGNALING_PATHWAY	0.000159345	0.0021927	0.518848	0.418536	1.78435	120	JAG2, NIBAN2, EGFL7, NOD2, HES1, GATA2, NOTCH2, JAG1, SRC, PRKCI, CEBPA, CDK6, CFD, ARRB1, APP, ARRDC1, BCL6, NOTCH1, PSENEN, YJEFN3, NCSTN, ITGB1BP1, ADAM17, NEURL1B, PSEN1, ANXA4, DTX4, LFNG, SNAI1, STAT3, ZMIZ1, TSPAN14, TRAF7, SREBF2, AKT1, IL2RA, EPN1, SLC35C2, POFUT1
WP	WP_MONOAMINE_TRANSPORT	0.000164907	0.00226668	0.518848	0.724723	2.04844	16	NECTIN2, IL1R1, UNC13B, TGFB1I1, SYN1, STX1A, IL1B, PPP2CB, TNF, SCAMP2
GOBP	GOBP_TELOMERE_CAPPING	0.00016521	0.0022683	0.518848	-0.529332	-2.00871	35	TERF2, MRE11, POT1, HNRNPD, MAP3K4, STN1, ERCC4, TFIP11, TERF1, TERF2IP, SMG6, USP7, TNKS2, ATM, DCLRE1B, PRKCQ
bioplanet	bioplanet_BDNF signaling pathway	0.000165961	0.00227606	0.518848	0.359731	1.6266	193	CLU, ADM, UPP1, AQP3, ITGB5, TIMP1, S100A4, DOCK4, VCL, ICA1, ZYX, GATA2, IGFBP4, PLP2, SERPINE1, HGF, VCAN, PTGER2, S100A2, MARCKS, CLIC1, ITGA2, GEM, VEGFA, CLCN5, AKR1C1, TGFBI, BMX, GNG11, RIMS3, CDKN1A, GPRC5B, RHOB, CADM1, ATP6AP1, IL6, SPP1, OSBPL1A, TFPI2, ATF3, RGS2, EMP3, KLF10, INSIG1, TWF2, GDF15, EGR2, PDIA4, GBE1, WDR1, S100A11, UGDH, PTGS2, CD58, CALR, P4HA2, SH3BP5, LMO4, PTPRK, C…
GOBP	GOBP_REGULATION_OF_PROTEIN_LOCALIZATION	0.000166385	0.00227933	0.518848	0.290842	1.44534	625	ALOX5, WLS, TRPM4, GLUL, UBXN2B, TREM2, STOM, LGALS3, CTSD, TNFAIP6, ITGAM, LILRB4, SPI1, VCL, ICA1, HFE, LRP1, DAB2, TLR2, RHOU, RHBDF2, FKBP1B, LIF, GPR27, DZIP1L, SRC, PTPN1, TYROBP, FRMD4A, PRKCI, TCIRG1, BRSK2, UNC13B, NPTN, TLR4, CD36, ABI3, ANG, NR1H3, STAC3, IL1A, IQSEC2, HIF1A, BMP6, LATS2, TCF7L2, TRIM5, OAZ1, YWHAE, PRKACA, CTNNA1, ATP2C1, RHOQ, TAX1BP3, RAB11FIP5, EPHB2, PID1, STX1A, …
GOBP	GOBP_POSITIVE_REGULATION_OF_ACTIN_CYTOSKELETON_REORGANIZATION	0.000167393	0.00229057	0.518848	0.736513	2.02787	14	HCK, NRP1, FES, BAIAP2, TEK, HCLS1, CDK5
GOBP	GOBP_CELL_KILLING	0.00016783	0.00229399	0.518848	0.435011	1.80779	102	CX3CR1, S100A12, FCGR1A, FCGR2B, NECTIN2, ITGAM, SPI1, CTSC, CLEC7A, IL18, AZU1, IL10, LYZ, TYROBP, CD5L, CXCL6, GAPDH, MYD88, ICAM1, C3, BCL2L1, RAB27A, CADM1, SYK, LAMP1, CFH, TREM1, NCR1, STXBP2, PRDX1, PTPN6
REACTOME	REACTOME_INFECTIOUS_DISEASE	0.000170633	0.0023297	0.518848	0.291547	1.45066	634	ADM, CD9, FCGR1A, HCK, HTR7, CYFIP1, FGR, MEFV, HMOX1, CD163, PYCARD, GNB4, IMPDH1, IFNGR2, ENTPD1, BAIAP2, CTSL, ENO1, AP2A1, TLR2, CASP1, RHBDF2, PRKAR2B, IL18, GPR27, IL1R1, LYN, PTGER2, IL10, SRC, C3AR1, HBEGF, TUBB1, CEBPD, VEGFA, IL1A, ADORA2B, YES1, GPR84, PRKACA, GSDMD, MRC1, APP, STX1A, GNG11, IFNGR1, IL1B, NLRP3, CYBA, MAP2K3, ADCY4, IFNAR2, BRK1, ARPC3, FURIN, PSMD13, ADRB2, ATP1B3, VP…
GOBP	GOBP_PROTEIN_MATURATION	0.0001709	0.00233074	0.518848	0.363548	1.6803	220	LDLRAD3, PLAU, THBS1, CASP4, PYCARD, PCSK6, CTSL, ENO1, LGMN, NOL3, CASP1, FKBP1B, SERPINE1, CTSS, SRC, CPM, NLRC4, VSIR, COMP, WFS1, CD5L, PRKACA, BACE2, LPCAT3, F3, CASP6, ANXA2, CIAO2A, APAF1, ERO1A, FURIN, DPP4, GSN, PLA2G7, ADAM8, PGK1, ADAM19, PSENEN, CTSZ, IL1R2, TMEM208, NCSTN, ADAM17, PSEN1, CASP7, FKBP1A, ATP6AP2, SERPINE2, IFI16, SEC11C, GLRX5, CIAO2B, DHH, TSPAN14, TSPAN17, CALR, CAST…
bioplanet	bioplanet_Transport of glucose and other sugars, bile salts and organic acids, metal ions and amine compounds	0.000171833	0.0023393	0.518848	0.521652	1.90843	49	SLC47A1, SLC31A1, SLC11A1, SLC39A4, SLC22A4, SLC22A15, RHAG, SLC39A1, SLC16A3, SLC2A6, SLC2A5, SLC6A6, SLC6A9, SLC18A2, SLC30A1, SLC22A18, SLC2A8
GOBP	GOBP_GLIAL_CELL_PROLIFERATION	0.000171909	0.0023393	0.518848	0.597121	1.98513	32	CLU, TREM2, HES1, TSPO, LYN, PRKCI, CSF1R, GFAP, IL1B, NOTCH1, IL6, TNF, GBA, CERS2, ASCL2
PID	PID_PTP1B_PATHWAY	0.000172853	0.00234693	0.518848	0.565675	1.91519	35	HCK, FGR, LYN, SRC, PTPN1, ITGA2B, CSF1R, YES1, CAPN1, SPRY2, INSR, STAT3, AKT1, RHOA, TYK2, CRK, SHC1, GRB2, YBX1, CSF1
bioplanet	bioplanet_Signaling events mediated by PTP1B	0.000172853	0.00234693	0.518848	0.565675	1.91519	35	HCK, FGR, LYN, SRC, PTPN1, ITGA2B, CSF1R, YES1, CAPN1, SPRY2, INSR, STAT3, AKT1, RHOA, TYK2, CRK, SHC1, GRB2, YBX1, CSF1
GOBP	GOBP_REGULATION_OF_PROTEIN_SECRETION	0.00017469	0.00236924	0.518848	0.380964	1.69618	160	ALOX5, WLS, TRPM4, GLUL, TREM2, ICA1, TLR2, RHBDF2, FKBP1B, GPR27, FRMD4A, TCIRG1, BRSK2, UNC13B, TLR4, ANG, NR1H3, IL1A, HIF1A, BMP6, TCF7L2, RAB11FIP5, STX1A, IL1B, SLC8B1, PIM3, ADAM9, PAM, ADAM8, MYH10, TRPM2, KLF7, RAB11FIP1, APBB3, VPS35, IL6, TNF, ERP29, PFKL, ACSL4, PPIA, ADTRP, SRI, APOE, PCK2, RHBDD3
HALLMARK	HALLMARK_APICAL_JUNCTION	0.000175602	0.00237898	0.518848	0.394825	1.71537	138	VWF, NECTIN2, CLDN5, VCL, MAPK11, ZYX, BAIAP2, MPZL2, VCAN, MAP3K20, SDC3, SRC, MMP9, SKAP2, ITGA2, TGFBI, MYL12B, ITGA9, CTNNA1, ADAM15, TSPAN4, MYL9, ICAM1, ADAM9, ACTA1, MYH10, RRAS, CTNND1, SYK, MMP2, ACTG1, CAP1, CD274, CD276, PTK2, INSIG1, NEXN, CD86, CLDN4, LAMB3, PIK3CB, MSN, GNAI1, ACTB, ARPC2, VASP, TUBG1, ITGB1, SHC1, NRXN2, EXOC4, LAMA3, NECTIN1, IKBKG, CRAT, ACTN4, ITGB4, ICAM2, B4GA…
GOBP	GOBP_NEURON_DEATH	0.000180316	0.00244015	0.518848	0.341715	1.59232	246	CLU, CX3CR1, SOD2, TREM2, HMOX1, FCGR2B, NRP1, UBE2M, ITGAM, GRN, CCL2, LGMN, NAIP, CCL3, IL10, G6PD, GPNMB, TYROBP, PRKCI, TNFRSF1B, TLR4, TNFRSF21, TLR6, MAP3K11, WFS1, HIF1A, CEBPB, APP, XRCC2, GAPDH, PPT1, APAF1, BCL2L1, ADAM8, TMTC4, TRPM2, CTSZ, VPS35, GPX1, NCSTN, PICALM, TNF, CDK5, PSEN1, GBA, CPEB4, CITED1, ITGB2, CASP7, NENF, RAPSN, GBE1, APOE, STAMBP, TBC1D24, CAPN2, AKT1, SLC7A11, CHM…
GOBP	GOBP_LEUKOCYTE_PROLIFERATION	0.000181182	0.00244916	0.518848	0.349158	1.62315	233	CLU, CCR2, TREM2, LGALS3, FCGR2B, SLC11A1, LST1, PYCARD, LILRB4, CD300A, AIF1, CD151, HES1, VSIG4, IL18, FKBP1B, LYN, CD180, IL10, GPNMB, PDCD1LG2, CCL8, TYROBP, TCIRG1, TNFRSF1B, CSF2RB, TNFSF13B, TLR4, TNFRSF21, VSIR, IL1A, CSF1R, CLEC4G, CEBPB, EPHB2, GSTP1, IL1B, BCL6, IDO1, CDKN1A, MYD88, TICAM1, PRKCD, CADM1, SYK, IL6, NCSTN, ARG2, GBA, CD274, CD276, PTK2, SPN, CD86, PTPN6, BTK, VAV3, MAPK3…
GOBP	GOBP_FIBRINOLYSIS	0.000186207	0.00251431	0.518848	0.795031	2.04363	11	PLAU, THBS1, SERPINE1, THBD, GP1BA, PROS1, SERPING1, SERPINB2
GOBP	GOBP_RELEASE_OF_CYTOCHROME_C_FROM_MITOCHONDRIA	0.000187695	0.0025316	0.518848	0.514772	1.88509	51	CLU, SOD2, PLAUR, PYCARD, NOL3, HGF, MMP9, PRELID1, BCL2L1, PPIF, GPX1, GGCT, PLSCR3, SFN, AKT1, BAD, FXN, ARRB2, PLA2G6, BID, IFI6, PDCD5
GOBP	GOBP_EOSINOPHIL_CHEMOTAXIS	0.000188531	0.00254009	0.518848	0.848045	1.96059	8	LGALS3, CCL2, CCL3, CCL8, CCL7
GOBP	GOBP_REGULATION_OF_NOTCH_SIGNALING_PATHWAY	0.000191816	0.0025815	0.518848	0.475056	1.84637	69	JAG2, NIBAN2, EGFL7, NOD2, HES1, GATA2, JAG1, SRC, PRKCI, ARRB1, ARRDC1, BCL6, NOTCH1, YJEFN3, ITGB1BP1, LFNG, STAT3, ZMIZ1, TSPAN14, SREBF2, AKT1, SLC35C2, POFUT1, GALNT11, SYNJ2BP, RFNG, YAP1, NOS3
KEGG	KEGG_GALACTOSE_METABOLISM	0.000192557	0.0025858	0.518848	0.653989	1.96536	21	HK3, HK2, GALK1, GAA, GLB1, GANC, PFKL, HK1, UGP2, GALE, PFKP, GLA, PGM1, B4GALT1
bioplanet	bioplanet_Galactose metabolism	0.000192557	0.0025858	0.518848	0.653989	1.96536	21	HK3, HK2, GALK1, GAA, GLB1, GANC, PFKL, HK1, UGP2, GALE, PFKP, GLA, PGM1, B4GALT1
bioplanet	bioplanet_FGF signaling pathway	0.000193993	0.00260041	0.518848	0.544159	1.93798	43	PLAU, PLAUR, DUSP6, HGF, SRC, MMP9, CTTN, CTNND1, SDC2, SPRY2, SPP1, PSEN1, STAT3, NCAM1, MAPK3, AKT1, SOS1, MET, GAB1, FGF2, SHC1, CBL, GRB2, SSH1, FGFR3
bioplanet	bioplanet_Passive transport by aquaporins	0.000194257	0.00260041	0.518848	0.995762	1.50455	2	AQP3, AQP9
GOBP	GOBP_EPITHELIAL_CELL_PROLIFERATION	0.000194338	0.00260041	0.518848	0.349277	1.62387	232	ALOX5, GLUL, HMOX1, NRP1, VDR, EGFL7, THBS1, SERPINB1, NOD2, HTRA1, TNFSF12, GRN, HES1, GATA2, CCL2, IGFBP4, DAB2, LAMC1, NOTCH2, TEK, HGF, IL10, C5AR1, ECM1, ANG, ZNF703, MTSS1, VEGFA, C5AR2, CDK6, HIF1A, BMP6, TCF7L2, CEBPB, F3, SPARC, CDKN1C, CYBA, NOTCH1, TGFBR1, NRP2, CD109, IFT57, GPX1, RTN4, IL6, NCSTN, ITGB1BP1, TNF, ADAM17, PSEN1, EREG, STAT3, MIR29A, APOE, PIK3CB, EAF2, TINF2, SFN, JAML…
GOBP	GOBP_NEGATIVE_REGULATION_OF_CHROMOSOME_ORGANIZATION	0.000194495	0.00260041	0.518848	-0.405807	-1.84287	78	SMARCA5, HNRNPU, WAPL, TERF2, RAD21, BUB3, POT1, ZW10, STN1, ERCC4, PTTG1, PCID2, TERF1, TERF2IP, SMG6, ZNF207, MAD2L1BP, TNKS2, ATM, SLX4, APC, NAT10, HNRNPC, CDK5RAP2, MAD2L1, LCMT1, XRCC1, EXOSC10, PINX1, PSMG2, TNKS, CTC1, FBXO5
bioplanet	bioplanet_Serotonin transporter activity	0.000195005	0.00260439	0.518848	0.898802	1.88913	6	MAOA, TGFB1I1, STX1A, IL1B, PPP2CB, SCAMP2
GOBP	GOBP_RESPONSE_TO_XENOBIOTIC_STIMULUS	0.00019682	0.00262577	0.518848	0.343003	1.59593	240	S100A12, ENG, SOD2, HMOX1, THBS1, SLC1A3, CARD9, CYP3A5, FOSL1, DUSP6, TSPO, CYBB, LYN, IL10, KCNQ1, ACSL1, SRC, LPL, ITGA2, APOBEC3A, AKR1C1, CBR1, MTHFR, SLC8A1, GSTP1, RNF149, IL1B, CYBA, ACER2, CYP1B1, GSTO1, SEMA3C, AGPAT2, GAS6, SORD, ABCC1, PLIN2, PAM, SLC1A2, FMO5, MMP2, ACAA1, GPX1, NFE2L2, TNF, ADAM17, EFTUD2, ALAD, AIM2, TOP1, GUK1, ABCC6, CMBL, TXN2, POR, CYP2J2, ATP1A1, PTGS2, VAV3, …
PID	PID_TOLL_ENDOGENOUS_PATHWAY	0.000198077	0.00263679	0.518848	0.662954	2.03933	23	S100A9, S100A8, LY96, TLR2, CD14, VCAN, TLR4, TLR6, TLR1, MYD88, TICAM1
bioplanet	bioplanet_Endogenous Toll-like receptor signaling	0.000198077	0.00263679	0.518848	0.662954	2.03933	23	S100A9, S100A8, LY96, TLR2, CD14, VCAN, TLR4, TLR6, TLR1, MYD88, TICAM1
GOBP	GOBP_LEUKOTRIENE_BIOSYNTHETIC_PROCESS	0.000198636	0.00263849	0.518848	0.803543	1.93954	9	ALOX5, ALOX5AP, MGST2, LTA4H, MGST3, SYK, GGT5, PLA2G4A
GOBP	GOBP_SMOOTH_MUSCLE_CONTRACTION	0.000198421	0.00263849	0.518848	0.500384	1.90842	60	PTAFR, HTR7, SPHK1, DOCK4, P2RX1, GUCY1A1, FKBP1B, TIFAB, DOCK5, ITGA2, TPCN2, COMP, MYLK, ADORA2B, CTTN, SLC8A1, ADRB2, ARHGAP42, RGS2, PTGS2, SETD3, EDN1, PLA2G6, HTR2B, RHOA
GOBP	GOBP_PROTEOLYSIS	0.0001989	0.00263915	0.518848	0.256978	1.30308	1222	CLU, S100A9, RNF144B, TFPI, CSTA, SERPINA1, ADAMDEC1, UBXN2B, TREM2, LDLRAD3, S100A8, MEFV, PLAU, PLAUR, THBS1, SERPINB1, CTSD, HTRA1, CTSB, ADAM33, SPINT1, ZNRF1, DAPK1, CASP4, QPCT, TIMP1, MMP1, PYCARD, CARD9, MMP19, GRN, FCN1, PZP, FGL2, PCSK6, HFE, CTSC, CTSL, LRP1, ENO1, QRICH2, MINDY1, ANPEP, P2RX1, CLEC7A, LGMN, NOL3, NAIP, DAB2, CASP1, SERPINE1, PRCP, CTSS, AZU1, TRIB1, HGF, FN1, LYN, IL1…
GOBP	GOBP_DNA_INTEGRITY_CHECKPOINT_SIGNALING	0.00019925	0.00264093	0.518848	-0.362836	-1.75629	109	XPC, WAC, SYF2, PLK2, RPA2, MRE11, CDKN1B, BLM, EME1, ETAA1, UIMC1, CDC5L, CCAR2, SDE2, HINFP, ZNF830, RFWD3, CCNG1, TP53, FOXN3, ATM, CRY1, GIGYF2, PLK3, RAD9A, TRIAP1, MSH2, FZR1, BRSK1, ATF2, INTS7, RAD17, ERCC6, TOPBP1, FBXO31, MDC1, HUS1B, USP28, NAE1, BRIP1, RINT1, RAD1, CDC14B, TAOK2, PRPF19
GOBP	GOBP_REGULATION_OF_CELL_CELL_ADHESION	0.000202637	0.00268292	0.518848	0.329237	1.56287	309	ALOX5, CD9, PTAFR, CCR2, VNN1, SELP, EMILIN2, LGALS3, FCGR2B, PLAUR, NOD2, HLX, PYCARD, LILRB4, CD300A, SPI1, AIF1, HES1, FGL2, CCL2, HFE, VSIG4, IL18, JAG1, FLOT1, LYN, IL10, GPNMB, SRC, IL1RN, PDCD1LG2, TNFSF13B, TNFRSF21, VSIR, ZNF703, VEGFA, IL1A, MYB, KLF4, CLEC4G, BMP6, YES1, ALOX12, MAP3K8, CEBPB, LOXL3, IL1B, NLRP3, BCL6, IDO1, FUT7, FERMT3, NOTCH1, DPP4, PTPN2, PRKCD, ADAM8, ADAM19, SYK,…
REACTOME	REACTOME_DEVELOPMENTAL_BIOLOGY	0.000203368	0.00268968	0.518848	0.291694	1.44741	617	MYH14, CSTA, TREM2, GRB10, NRP1, COL9A2, ALCAM, SPI1, MAPK11, HES1, GATA2, FES, PCSK6, AP2A1, ITGAV, LAMC1, CSF3R, LYN, GFRA3, SRC, LPL, MMP9, SDCBP, ITGA2B, MAFB, TYROBP, ITSN1, SPAG9, TUBB1, CD36, DNM1, ITGA2, CEBPD, PLXNC1, CEBPA, SEMA4A, MYB, PITPNA, GAB2, RXRA, KLF4, MYL12B, YES1, ITGA9, PRKACA, CTNNA1, CEBPB, LYPLA2, EPHB2, STX1A, ARPC3, CFL1, CDKN1A, MYL9, FURIN, NOTCH1, PSMD13, CAPN1, PTG…
GOBP	GOBP_CRANIAL_NERVE_DEVELOPMENT	0.00020489	0.00270689	0.518848	0.619817	2.0008	27	NRP1, SLC1A3, HES1, TIFAB, MAFB, TCIRG1, EPHB2, NRP2, CHD7, EGR2, NAV2, CITED2, SEMA3F
GOBP	GOBP_SYNAPSE_PRUNING	0.000206506	0.0027253	0.518848	0.846435	1.95687	8	CX3CR1, TREM2, ITGAM, C1QB, C1QC, C3, CDK5
GOBP	GOBP_CELLULAR_RESPONSE_TO_BACTERIAL_LIPOPROTEIN	0.000207256	0.00272639	0.518848	0.897149	1.88566	6	TLR2, CD14, CD36, TLR6, TLR1
GOBP	GOBP_NITRIC_OXIDE_MEDIATED_SIGNAL_TRANSDUCTION	0.000207187	0.00272639	0.518848	0.733167	2.01866	14	FPR1, GUCY1B1, THBS1, GUCY1A1, CD36, VEGFA, APOE, MAFA, DDAH2, NOS3, PDE5A
GOBP	GOBP_RESPONSE_TO_BACTERIAL_LIPOPROTEIN	0.000207256	0.00272639	0.518848	0.897149	1.88566	6	TLR2, CD14, CD36, TLR6, TLR1
GOBP	GOBP_REGULATION_OF_DNA_RECOMBINATION	0.000208279	0.00273691	0.518848	-0.36419	-1.74697	105	KPNA1, IL7R, WDR48, RPA2, TERF2, ING3, RIF1, MRE11, BLM, TFRC, BRD8, VPS72, CD28, TBX21, EPC1, SHLD3, APLF, FANCB, ARID2, SETD2, TERF2IP, MAGEF1, KPNA2, HDGFL2, MMS19, SMCHD1, MSH2, YEATS4, PTPRC, HMCES, FBH1, WRAP53, ERCC6, EXOSC3, MSH3, POLQ, POGZ, SHLD1, NSD2, MSH6, PAXIP1, ALYREF, PPP4R2
GOBP	GOBP_REGULATION_OF_ACTIN_CYTOSKELETON_REORGANIZATION	0.000208714	0.00273968	0.518848	0.593737	1.97388	32	HCK, NRP1, FES, BAIAP2, NOTCH2, TEK, ABI3, CSF1R, PHPT1, TRPM2, ESAM, HCLS1, CDK5, GMFG, ARHGDIA
GOBP	GOBP_REGULATION_OF_MUSCLE_SYSTEM_PROCESS	0.000211292	0.00276848	0.518848	0.397299	1.71897	135	TRPM4, PTAFR, SPHK1, TNFRSF1A, DOCK4, AIF1, ENO1, P2RX1, NOL3, GUCY1A1, FKBP1B, TIFAB, DOCK5, KCNQ1, G6PD, TNFRSF1B, ITGA2, ATP2A2, ADORA2B, PRKACA, CTTN, SLC8A1, GSTO1, MYL9, NOTCH1, ADRB2, EHD3, TMEM38B, CALM3, KCNJ2, ARHGAP42, RGS2, RNF207, SRI, TMEM38A, ATP1A1, PTGS2, MTPN, SETD3, EDN1, P2RX4, HDAC4, SLC9A1, MEF2A, RHOA, KCNMA1, JARID2, SCN4A, NOS3, PDE5A, SOD1, CTDP1, PPP3CA, ATP1B1, FOXO3, …
WP	WP_NANOMATERIALINDUCED_INFLAMMASOME_ACTIVATION	0.00021136	0.00276848	0.518848	0.895005	1.88115	6	CTSB, PYCARD, CASP1, TLR4, IL1B
GOBP	GOBP_DENDRITIC_CELL_ANTIGEN_PROCESSING_AND_PRESENTATION	0.000212275	0.00277749	0.518848	0.81318	2.03823	10	FCGR2B, SLC11A1, THBS1, NOD2, CD68, FGL2, CLEC4A
GOBP	GOBP_NEGATIVE_REGULATION_OF_MYELOID_LEUKOCYTE_DIFFERENTIATION	0.000213542	0.00279109	0.518848	0.613858	1.99495	29	TNFAIP6, LILRB4, GATA2, TRIB1, CCL3, LYN, MAFB, TLR4, C1QC, CDK6, PTPN2, TCTA
GOBP	GOBP_ENTRY_INTO_HOST	0.000214021	0.00279436	0.518848	0.430183	1.78772	102	ITGB5, NECTIN2, NRP1, CTSB, SCARB2, LDLR, FCN1, CTSL, ITGAV, ANPEP, SRC, PLSCR1, ITGA2, TPCN2, PTX3, CLEC4G, TRIM5, MRC1, GAS6, ICAM1, GSN, LAMP1, INSR, SELPLG, CD86, CCR5, CXCL8, SLC1A5, SIGLEC1, NCAM1, P4HB, EPS15, SNX3, FUCA2, CD81, NPC1, CD4, ITGB1, ITGA5, CBL, CD74, NECTIN1
GOBP	GOBP_POSITIVE_REGULATION_OF_ENDOCYTOSIS	0.000215299	0.00280806	0.518848	0.464354	1.80596	70	CLU, TREM2, RAB31, CD151, GATA2, HFE, LRP1, DAB2, SERPINE1, CD14, FLOT1, CD36, ITGA2, VEGFA, ARRB1, ANXA2, HIP1, PPT1, C3, SYK, INSR, ABCA7, APOE, ANO6, AP2M1
GOBP	GOBP_MITOCHONDRIAL_RNA_METABOLIC_PROCESS	0.000218823	0.00285099	0.518848	-0.492745	-1.99187	45	PDE12, FASTKD1, MTO1, FASTKD5, PRKAA1, MTERF2, TARS2, MTERF4, TFAM, YARS2, MTERF1, FASTKD2, TRMT10C, TRMT5, MTRES1, CDK5RAP1, EARS2, FASTKD3, TRMT61B, POLRMT, PNPT1, TWNK, AARS2, SUPV3L1, METTL4, GRSF1, TRNT1, TRIT1
GOBP	GOBP_PHOSPHATIDYLCHOLINE_METABOLIC_PROCESS	0.000221037	0.00287677	0.518848	0.519021	1.88923	50	LDLR, PCYT1A, PLA2G15, LPCAT2, NR1H3, LPCAT3, DBI, PLA2G7, ENPP2, FABP5, MBOAT7, PNPLA6, PLA2G4A, MFSD2A, CAPN2, MBOAT1, PLA2G6, ABHD3
GOBP	GOBP_NEGATIVE_REGULATION_OF_CYSTEINE_TYPE_ENDOPEPTIDASE_ACTIVITY	0.000223315	0.00290333	0.518848	0.487598	1.85042	59	PLAUR, THBS1, NOL3, NAIP, HGF, SRC, MMP9, VEGFA, KLF4, PRDX5, GAS6, PRDX3, GPX1, TNF, IFI16, CDKN2D, POR, PTGS2, MICAL1, CD44, SFN, CAST, AKT1, ARRB2, IFI6, LAMTOR5, TNFSF14, VIL1, PARK7
GOBP	GOBP_NEURON_DEVELOPMENT	0.00022364	0.00290447	0.518848	0.287777	1.43653	674	ADM, EMB, MYO7A, S100A9, NIBAN2, SOD2, CYFIP1, NRP1, LST1, SLC1A3, SCARB2, UGCG, ALCAM, GRN, VCL, HES1, GATA2, FES, BAIAP2, DAB2, PLXNB2, NOTCH2, FKBP1B, LIF, HDGFL3, TSPO, FLOT1, HGF, FN1, B4GALT5, LYN, GFRA3, KCNQ1, RTN4RL2, SS18L1, PRKCI, BRSK2, NPTN, SPAG9, ABI3, RAB13, PLXNC1, TNFRSF21, ARSB, GPRIN3, SEMA4A, VEGFA, LRTM2, OLFM1, CSF1R, APLP2, KLF4, NR2F6, SYN1, SGK1, CTNNA1, GFAP, LYPLA2, FA…
GOBP	GOBP_REGULATION_OF_CELLULAR_PH	0.000224658	0.00291461	0.518848	0.498293	1.90045	60	DMXL2, RAB20, SLC11A1, ATP6V0D2, GRN, MAFG, TCIRG1, ATP6V0D1, ATP6V0A1, RAB39A, PPT1, LACC1, ATP6AP1, SLC9A8, ATP6V0E1, TM9SF4, ATP6AP2, TMEM165, MAPK3, SLC9A1, ATP6V1H, ATP5F1B
GOBP	GOBP_LOCALIZATION_WITHIN_MEMBRANE	0.000224965	0.00291549	0.518848	0.303206	1.48857	488	RAB3D, TREM2, STOM, LGALS3, RAB31, BVES, TNFAIP6, PSAP, ZDHHC14, ITGAM, TNFRSF1A, LRP1, DAB2, FLOT1, KIF13A, SDCBP, PRKCI, ABI3, RAB13, PRAM1, STAC3, IQSEC2, RAB32, GRIN2C, ATP2C1, NCF1, RHOQ, EPB41L3, EPHB2, PID1, STX1A, P2RY1, SH3GLB1, CAPN3, RAB10, GAS6, CMTM6, ATP1B3, VPS37C, EHD3, PGRMC1, GSN, BCL2L1, PDZD11, CALM3, ATG3, CIB1, YJEFN3, WDR83OS, CCDC22, TM9SF1, VPS35, EHD4, ATP6AP1, PICALM, I…
WP	WP_NEUROINFLAMMATION_AND_GLUTAMATERGIC_SIGNALING	0.000228196	0.00295424	0.518848	0.433295	1.79323	99	TRPM4, GLUL, SLC1A3, TNFRSF1A, IFNGR2, LIF, IL1R1, CAMKK2, IL10, TNFRSF1B, PLCB1, IL1A, SLC6A9, GRIN2C, PRKACA, GFAP, IL13RA1, IFNGR1, IL1B, CFL1, LRRC8B, TGFBR1, SLC1A2, IL1R2, IL6, TNF, DISC1, INSR, STAT3, PLCB2, PPP1CA, MAPK3, AKT1, PLCB3
bioplanet	bioplanet_Vibrio cholerae infection	0.000230772	0.00298443	0.518848	0.565395	1.94367	38	ATP6V0D2, KCNQ1, ATP6V1A, TCIRG1, ATP6V0D1, PRKACA, ATP6V0A1, ATP6V1D, ATP6AP1, ACTG1, ATP6V1B2, KDELR1, ATP6V0E1, PDIA4, KDELR2, SEC61B, ACTB, SEC61A1
GOBP	GOBP_B_CELL_MEDIATED_IMMUNITY	0.000231868	0.00298914	0.518848	0.430611	1.78682	97	CLU, BATF, FCGR1A, TREM2, FCGR2B, NECTIN2, NOD2, CARD9, BCL3, IL10, FCER1G, TCIRG1, CSF2RB, TLR8, C1QB, TREX1, C1QC, BCL6, MYD88, PRKCD, C3, TNF, PARP3, MAD2L2, SERPING1, PTPN6, ERCC1, BTK, IL21R, CD70
GOBP	GOBP_CELLULAR_RESPONSE_TO_PEPTIDE	0.000231558	0.00298914	0.518848	0.340585	1.58825	252	CYFIP1, TREM2, GRB10, FCGR2B, RAB31, NOD2, FPR2, CASP4, BAIAP2, LRP1, AGTRAP, LGMN, SH2B2, PTPRE, LYN, SRC, LPL, PTPN1, PRKCI, TLR4, CD36, PXN, SOCS2, RAB13, TLR6, PLCB1, MDM2, RHOQ, APP, EPHB2, PID1, IL1B, CYBA, CYP1B1, RAB10, FUT7, ESRRA, GJB2, ADRB2, PTPN2, VIM, ICAM1, ABCC1, PRKCD, NFE2L2, TNF, CDK5, PSEN1, INSR, ZDHHC7, SESN3, PTK2, INSIG1, PDK4, GDF15, STAT3, CYSLTR2, POR, PCK2, SLC2A8, RIP…
GOBP	GOBP_REGULATION_OF_CELL_CYCLE_G2_M_PHASE_TRANSITION	0.000231783	0.00298914	0.518848	-0.384273	-1.78497	89	SYF2, USP47, DYRK3, MTA3, MRE11, RAD21, BLM, CDC7, UIMC1, NPM1, ZNF830, RRM1, VPS4B, CCNG1, TP53, FOXN3, ATM, NABP1, RAD51C, FZR1, BRSK1, FHL1, RAD17, TOPBP1, RRM2B, DBF4B, CCNQ, HUS1B, NAE1, MIIP, RINT1, PINX1, CDC14B, PAXIP1, CDC25C, TAOK2, GPR132, CTC1, CDC25B, SIN3A, FBXO5
GOBP	GOBP_RESPONSE_TO_GROWTH_FACTOR	0.000232225	0.0029906	0.518848	0.306635	1.48908	422	ZFHX3, CX3CR1, ENG, NIBAN2, CYFIP1, ITGB5, GRB10, SPHK1, NRP1, THBS1, HTRA1, ANXA3, TNFAIP6, SPINT1, SPI1, CLDN5, HES1, ZYX, BAIAP2, CCL2, PCSK6, HFE, MTSS2, LGMN, DUSP6, DAB2, NOTCH2, HGF, SPRED1, IL10, SRC, SDCBP, PTPN1, SPRY1, TNFRSF1B, NPTN, TLR4, PXN, ZNF703, VEGFA, COMP, TGFB1I1, SORT1, KLF4, HIF1A, BMP6, LATS2, YES1, IQGAP1, APP, LTBP1, CDKN1C, IL1B, MAP2K3, P2RY1, APAF1, FURIN, NOTCH1, ZE…
GOBP	GOBP_CELL_PART_MORPHOGENESIS	0.000233854	0.00300402	0.518848	0.309339	1.49484	403	MYH14, EMB, NIBAN2, CYFIP1, NECTIN2, NRP1, ALCAM, VCL, BAIAP2, PLXNB2, NOTCH2, FLOT1, FN1, B4GALT5, GFRA3, SRC, SS18L1, BRSK2, NPTN, SPAG9, ABI3, PLXNC1, SEMA4A, VEGFA, LRTM2, OLFM1, CSF1R, APLP2, SGK1, LYPLA2, FARP1, S100A6, IQGAP1, CTTN, EPB41L3, APP, EPHB2, PID1, GAS7, DOCK7, CORO1C, RAB10, SEMA6B, CFL1, SEMA3C, NOTCH1, PGRMC1, SHTN1, BCL2L1, PAK1, PLEC, SCN1B, PLEKHO1, ENPP2, LAMB2, KLF7, NRP…
bioplanet	bioplanet_RAGE pathway	0.000234132	0.00300402	0.518848	0.539498	1.95208	46	PTGES, TIMP1, MMP1, LDLR, CLDN5, CCL2, TLR2, SERPINE1, FN1, MMP9, TLR4, VEGFA, F3, IL1B, CYBA, ICAM1, IL6, TNF, CXCL8, SREBF2, EDN1, DDAH2, COX2, BACE1, ITGB1, ITGA5
GOBP	GOBP_GENE_SILENCING_BY_RNA	0.000234249	0.00300402	0.518848	-0.390655	-1.81993	90	CNOT8, SMAD3, CNOT6L, TDRD12, ERI1, PUM1, CNOT2, SMAD2, TSNAX, CNOT1, TNRC6C, CLP1, CNOT7, AGO3, DHX9, DROSHA, DDX3X, EIF4ENIF1, TNRC6B, CNOT6, AGO1, HELZ, XPO5, TP53, SNIP1, CELF1, TSN, PUS10, SMAD1, PIWIL1, ZC3H7A
REACTOME	REACTOME_NONSENSE_MEDIATED_DECAY_NMD	0.000234249	0.00300402	0.518848	-0.39039	-1.81869	90	SMG8, CASC3, GSPT1, EIF4A3, SMG5, GSPT2, PNRC2, UPF2, SMG7, SMG6, RPS20, RBM8A, UPF1, RPL22L1, SMG9, RPS6, DCP1A, RPS29, RPL5, RPSA, UPF3B, RPL15, RPL24, RPS3, RPL13, RPL35A, RPL32, RPS18, RPS21, RPL18, RPL22, RPL35, RPS14, RPL13A, RPS3A, RPS15, RPS16, RPS13, RPL27A, RPL10A, RPL38, RPL37A, RPL12, RPS5, RPLP2, RPL4, RPL10, RPS28, RPS4X, RPS7, RPL27, RPL36AL, RPL3, RPS8, RPS23, FAU, RPL7A, RPL31, R…
REACTOME	REACTOME_INTERLEUKIN_1_PROCESSING	0.000234574	0.00300504	0.518848	0.842448	1.94765	8	CASP1, IL18, IL1A, GSDMD, IL1B
GOBP	GOBP_RECEPTOR_INTERNALIZATION	0.000237285	0.00303583	0.518848	0.472455	1.85699	74	ADM, CD9, RAB31, LILRB4, LRP1, FLOT1, SDCBP, FCER1G, CD36, DNM1, VEGFA, ARRB1, ANXA2, SYK, CXCR1, ANKRD13D, PICALM, RAMP2, INSR, GRK3, ITGB2, LRRTM2, CXCL8, NUMB, OPHN1, AP2M1, SNX1, RAMP1, ARRB2, LMBRD1, HTR2B, AHI1, CD81
bioplanet	bioplanet_Tight junction	0.000237473	0.00303583	0.518848	0.450142	1.80995	84	MYH14, CLDN5, SRC, PRKCI, RAB13, MYL12B, YES1, CTNNA1, CTTN, EPB41L3, MRAS, YBX3, MYL9, PRKCD, PPP2CB, MYH10, RRAS, HCLS1, ACTG1, CSNK2A2, PARD3, CGN, CLDN4, AKT1, MAGI3, GNAI1, ACTB, RHOA, CDK4, PPP2R1A, EXOC4, EPB41L1, PPP2R1B, ACTN4, PRKCA, CLDN3
bioplanet	bioplanet_Parkinson's disease	0.000237807	0.00303693	0.518848	0.456454	1.84142	85	NDUFS8, COX6B1, APAF1, SLC18A2, NDUFV2, NDUFB7, COX4I1, VDAC1, NDUFB2, NDUFS6, NDUFA8, NDUFS3, UQCRH, SDHC, VDAC2, COX5A, NDUFV1, COX2, ND5, NDUFB3, NDUFB8, COX8A, NDUFA9, NDUFS7, ATP8, PARK7, CASP9, ND4, UQCRB, NDUFC2, LRRK2, NDUFA10, UBE2J2, ND4L, NDUFAB1, UBE2L6, UQCRC1, COX7B, NDUFB5, COX7A1, ND1, COX6C, NDUFS4, NDUFS1, UBE2L3, NDUFB10, HTRA2, NDUFA6, UQCRC2, COX7A2, NDUFV3, UBA1, CYTB, COX1,…
GOBP	GOBP_POSITIVE_REGULATION_OF_NEUROGENESIS	0.000239127	0.00305062	0.518848	0.391537	1.7206	150	CX3CR1, CYFIP1, NRP1, SPINT1, HES1, BAIAP2, TLR2, PLXNB2, LIF, TSPO, FN1, LYN, SS18L1, PRKCI, TNFRSF1B, NPTN, PLXNC1, VEGFA, HIF1A, GFAP, EPHB2, XRCC2, IL1B, NOTCH1, SHTN1, TTBK1, CUX1, IL6, TNF, PARP6, DISC1, DBNL, LIMK1, TWF2, SERPINE2, PLXND1, EGR2, NUMB, TGM2, DIXDC1
GOBP	GOBP_PHOSPHATIDYLSERINE_METABOLIC_PROCESS	0.000241162	0.00307181	0.518848	0.649918	1.95312	21	PLA2G15, PLSCR1, SERINC5, LPCAT3, PLA1A, ABHD16A, MFSD2A, MBOAT1, ABHD16B
GOBP	GOBP_RETINAL_CONE_CELL_DIFFERENTIATION	0.00024129	0.00307181	0.518848	-0.93992	-1.8074	4	USH1C, TOPORS
GOBP	GOBP_CARBOHYDRATE_TRANSPORT	0.000242511	0.00308415	0.518848	0.419066	1.74992	109	PPBP, AQP3, AQP9, SLC50A1, GRB10, HK2, SLC37A2, PRKCI, SLC2A6, SLC2A5, SORT1, YES1, RHOQ, PID1, MFSD2B, IL1B, FFAR4, C3, SLC1A2, SESN2, FABP5, SLC2A14, SLC35A2, NFE2L2, TNF, INSR, ZDHHC7, SLC35A5, RTN2, SLC2A8, MFSD2A, AKT1, SMPD3, EDN1, SLC27A4, SLC5A11, MEF2A, SLC35A4, VIL1, SLC45A4, SLC23A1
GOBP	GOBP_HUMORAL_IMMUNE_RESPONSE_MEDIATED_BY_CIRCULATING_IMMUNOGLOBULIN	0.000252367	0.00320616	0.498493	0.611048	1.98582	29	CLU, TREM2, FCGR2B, NOD2, BCL3, C1QB, C1QC, C3, TNF, SERPING1, PTPN6
WP	WP_ELECTRON_TRANSPORT_CHAIN_OXPHOS_SYSTEM_IN_MITOCHONDRIA	0.000253066	0.00321081	0.498493	0.470112	1.84133	72	NDUFS8, COX6B1, NDUFV2, NDUFB7, COX4I1, NDUFB2, NDUFS6, ATP5F1E, ATP5F1D, NDUFA8, NDUFS3, UQCRH, SDHC, SURF1, COX5A, NDUFV1, ATP5MG, NDUFB3, NDUFB8, ATP5PO, COX8A, NDUFA9, COX17, NDUFS7, ATP5F1B, ATP5PB, UQCRB, NDUFC2, NDUFA10, ATP5PD, UCP2, NDUFAB1, UQCRC1, COX7B, NDUFB5, COX7A1, COX6C, NDUFS4, ATP5IF1, NDUFS1, NDUFB10, COX15, NDUFA6, UQCRC2, COX7A2, NDUFV3
GOBP	GOBP_MITOTIC_CELL_CYCLE_CHECKPOINT_SIGNALING	0.000253257	0.00321081	0.498493	-0.357701	-1.7493	114	XPC, WAC, SYF2, PLK2, RPA2, MRE11, BUB3, ZW10, CDKN1B, BLM, EME1, UIMC1, PCID2, SDE2, ZNF830, RFWD3, ZNF207, MAD2L1BP, CCNG1, TP53, FOXN3, ATM, APC, GIGYF2, PLK3, RAD9A, NABP1, TRIAP1, MSH2, FZR1, CDK5RAP2, BRSK1, ATF2, RAD17, TOPBP1, FBXO31, MDC1, MAD2L1, HUS1B, LCMT1, NAE1, RINT1, CDC14B, TAOK2, PSMG2
GOBP	GOBP_RNA_POLYADENYLATION	0.000255884	0.00324076	0.498493	-0.495576	-1.9887	44	SCAF8, CPSF7, VIRMA, TENT2, CPSF6, WDR33, PAPOLG, CLP1, NUDT21, CDC73, PAF1, CSTF3, PAPOLA, MTPAP, YTHDC1, CCNT1, CTR9, PNPT1, ZC3H14, CDK9
GOBP	GOBP_AMINO_ACID_IMPORT	0.000257028	0.00324575	0.498493	0.603063	1.99015	31	SLC47A1, SLC1A3, SLC22A4, SLC43A2, SLC6A6, SLC6A9, SLC36A4, GFAP, SLC7A8, SLC1A2, TNF, RGS2, PSEN1, SLC1A5, SLC7A11, SLC36A1, CLN8, SLC7A5, ITGB1
GOBP	GOBP_NEURON_APOPTOTIC_PROCESS	0.000257062	0.00324575	0.498493	0.374062	1.66789	162	CX3CR1, SOD2, TREM2, HMOX1, NRP1, UBE2M, ITGAM, GRN, CCL2, LGMN, NAIP, CCL3, IL10, G6PD, TYROBP, PRKCI, TNFRSF21, MAP3K11, WFS1, HIF1A, CEBPB, APP, XRCC2, GAPDH, PPT1, APAF1, BCL2L1, ADAM8, TMTC4, GPX1, NCSTN, TNF, CDK5, PSEN1, GBA, CPEB4, CITED1, CASP7, RAPSN, GBE1, APOE, STAMBP, NLRP1, ARRB2, DNAJC5, PIGT, BID, RHOA, GCLM, BACE1, GRM4, PARK7, CASP9
KEGG	KEGG_UBIQUITIN_MEDIATED_PROTEOLYSIS	0.000257073	0.00324575	0.498493	-0.350274	-1.73896	125	BIRC2, HERC4, CDC23, SKP2, SMURF2, FBXW8, HERC3, UBE2J1, ITCH, UBE2O, UBE2Z, NEDD4, UBE3C, PPIL2, PIAS1, BTRC, CUL3, MGRN1, CDC26, PIAS2, UBE4A, CUL1, DET1, CUL4B, BIRC3, TRIM32, UBE3B, UBA3, UBE2S, UBA2, MAP3K1, FZR1, UBE2D2, RCHY1, ANAPC1, UBE2Q1, TRAF6, ANAPC4, PIAS3, KLHL13, CBLB, SIAH1, ANAPC10, SOCS1, KLHL9, UBE3A, PRPF19
GOBP	GOBP_RIBONUCLEOSIDE_DIPHOSPHATE_METABOLIC_PROCESS	0.000257614	0.00324923	0.498493	0.434753	1.76735	87	HK3, HK2, ENO1, GALK1, SLC2A6, TREX1, HIF1A, AK4, LDHA, APP, GAPDH, PGAM1, TPI1, PGK1, PSEN1, NUDT16, PFKL, INSR, HK1, MLXIPL, NCOR1, GUK1, STAT3, MPP1, ADPGK, PFKP, MAGI3, BAD, NUDT9, HDAC4, AK2
GOBP	GOBP_NUCLEAR_TRANSCRIBED_MRNA_CATABOLIC_PROCESS_NONSENSE_MEDIATED_DECAY	0.000258239	0.00325375	0.498493	-0.520633	-1.9757	35	SMG8, CASC3, GSPT1, EIF4A3, SMG5, GSPT2, PNRC2, UPF2, SMG7, SMG6, RBM8A, UPF1, PYM1, DCP1B, SMG9, SKIV2L, DCP1A, EXOSC10, UPF3B
GOBP	GOBP_NEUTRAL_LIPID_METABOLIC_PROCESS	0.000260885	0.00328371	0.498493	0.452066	1.80228	80	DAGLB, LDLR, SLC22A4, ACSL1, DAGLA, PLA2G15, DGAT2, LPL, GK5, ANG, NR1H3, LYPLA2, C3, ABHD2, MGLL, MBOAT7, DGAT1, GPAT3, GPX1, INSIG1, PGS1, APOBR, PLA2G4A, ABHD16A, ABHD5, APOE, PCK2, MFSD2A, ABHD16B, LMF1, CAT, SREBF1, LPGAT1, CPT1A
GOBP	GOBP_MONOVALENT_INORGANIC_CATION_HOMEOSTASIS	0.000262578	0.00329942	0.498493	0.444769	1.83095	92	DMXL2, RAB20, SLC11A1, ATP6V0D2, SLC1A3, GRN, MAFG, KCNQ1, TCIRG1, ATP6V0D1, IL1A, ATP6V0A1, SLC8A1, RAB39A, PPT1, LACC1, ATP1B3, KCNJ2, ATP6AP1, SLC9A8, ATP6V0E1, TM9SF4, ATP6AP2, PDK4, SLC12A9, ATP1A1, TMEM165, MAPK3, EDN1, SLC9A1, UPK3A, ATP6V1H, KCNMA1, ATP5F1B
REACTOME	REACTOME_TRANSCRIPTIONAL_REGULATION_BY_TP53	0.000262853	0.00329942	0.498493	-0.264672	-1.46726	318	CNOT8, SESN1, DYRK2, BRPF3, MAP2K6, TAF1, RRAGA, GADD45A, CNOT6L, PRKAA1, RGCC, RBL2, CDK13, PLK2, RPA2, CASP10, EHMT2, KAT6A, YWHAZ, BBC3, TSC1, MRE11, CDKN1B, CNOT2, BLM, NELFA, RFC5, TBP, CENPJ, MTA2, GLS, CNOT1, TNRC6C, POLR2D, PIP4K2A, PCNA, CNOT7, AGO3, TSC2, NPM1, HDAC1, RFFL, MAPKAP1, TNRC6B, HDAC2, BTG2, USP7, CNOT6, AGO1, ING2, CCNG1, TP53RK, TP53, ATM, CCNT2, CNOT4, TAF11, TAF7, PPP1R1…
GOBP	GOBP_SPLICEOSOMAL_COMPLEX_ASSEMBLY	0.00026294	0.00329942	0.498493	-0.465945	-1.95267	50	SF1, RBM5, SRSF6, SF3B1, SRSF5, SRPK3, PSIP1, DDX23, SETX, PTBP2, SF3A1, CELF1, PRPF39, SLU7, YTHDC1, PRPF6, KHDC4, SMN1, DDX1, SRSF10, LUC7L, SCAF11, GCFC2, PRPF19, SRPK2, CRNKL1, SRSF1, ZRSR2, SRSF12, SNRPD1
REACTOME	REACTOME_NUCLEAR_IMPORT_OF_REV_PROTEIN	0.000263905	0.00330813	0.498493	-0.554338	-1.99531	30	NUP107, NUP160, NUP43, RAE1, NUP54, NPM1, NUP35, KPNB1, NUP42, NUP88, NUP155, RANBP2, NUP62, RAN, NUP133, NUP210
REACTOME	REACTOME_IRON_UPTAKE_AND_TRANSPORT	0.000266096	0.00333218	0.498493	0.534639	1.90408	43	STEAP3, HMOX1, LCN2, SLC46A1, ATP6V0D2, CYBRD1, HFE, ATP6V1A, TCIRG1, ATP6V0D1, ATP6V0A1, FTL, ATP6V1D, ATP6AP1, ATP6V1B2, MCOLN1, ATP6V0E1
GOBP	GOBP_POSITIVE_REGULATION_OF_CELL_ACTIVATION	0.00026661	0.00333521	0.498493	0.345498	1.61748	266	PTAFR, CCR2, VNN1, SELP, FGR, TNIP2, TREM2, LILRA5, NECTIN2, THBS1, NOD2, HLX, PYCARD, ITGAM, LILRB4, AIF1, HES1, GATA2, CCL2, CTSC, CLEC7A, IL18, CCL3, LYN, IL10, SRC, PDCD1LG2, TYROBP, TNFSF13B, TLR4, VSIR, CEBPA, TLR6, IL1A, ADORA2B, MYB, GAB2, YES1, MAP3K8, PLEK, EPHB2, IL1B, GP1BA, NLRP3, CAPN3, BCL6, LILRA2, GP9, CDKN1A, IL15RA, MYD88, GAS6, DPP4, TICAM1, ADAM8, SYK, LAMP1, TTBK1, IL6, TNF,…
GOBP	GOBP_RESPONSE_TO_OXYGEN_LEVELS	0.000268044	0.00334973	0.498493	0.350754	1.62343	221	ADM, AQP3, SOD2, TREM2, PLAU, HMOX1, THBS1, HK2, KCNMB1, ENO1, AGTRAP, PLOD1, NOL3, TLR2, CYBB, ATP6V1A, SRC, ITGA2, ANG, ATP6V0D1, VEGFA, IL1A, HIF1A, AK4, ATG7, MDM2, MTHFR, SLC8A1, CYBA, APAF1, ADAM15, ERO1A, NOTCH1, DPP4, PAM, ADAM8, PGK1, TMBIM6, MMP2, ATP6AP1, NFE2L2, TNF, ADAM17, CPEB4, RYR1, TM9SF4, ALAD, PLEKHN1, SIRT2, TXN2, SCFD1, ASCL2, NDRG1, SLC2A8, PTGS2, PIK3CB, CAPN2, P4HB, AKT1,…
REACTOME	REACTOME_COLLAGEN_FORMATION	0.000269529	0.00336143	0.498493	0.533834	1.90121	43	CTSB, COL9A2, CD151, CTSL, PLOD1, CTSS, MMP9, LOXL3, PLOD3, PLEC, COL10A1, COLGALT1, LAMB3, P4HA2, P4HB, P3H1, LOX, LAMA3, PPIB, ITGB4, ADAMTS14
REACTOME	REACTOME_TRANSPORT_OF_BILE_SALTS_AND_ORGANIC_ACIDS_METAL_IONS_AND_AMINE_COMPOUNDS	0.000269529	0.00336143	0.498493	0.533735	1.90086	43	EMB, SLC47A1, SLC31A1, SLC11A1, SLC39A4, SLC22A4, SLC22A15, RHAG, SLC39A1, SLC16A3, SLC6A6, SLC6A9, SLC18A2, SLC30A1, SLC22A18
GOBP	GOBP_TRANS_SYNAPTIC_SIGNALING_BY_TRANS_SYNAPTIC_COMPLEX	0.000271268	0.0033783	0.498493	0.919889	1.83884	5	IL1RAP, NPTN, FARP1, EPHB2
GOBP	GOBP_VASCULAR_ENDOTHELIAL_GROWTH_FACTOR_PRODUCTION	0.000271434	0.0033783	0.498493	0.612179	1.97615	27	CCR2, C5AR1, C3AR1, IL1A, ADORA2B, HIF1A, IL1B, CYP1B1, C3, IL6, TNF, NDRG2, PTGS2, SARS1
REACTOME	REACTOME_COMMON_PATHWAY_OF_FIBRIN_CLOT_FORMATION	0.000275614	0.00342685	0.498493	0.728993	2.00716	14	F13A1, THBD, PF4V1, PF4, PROS1, CD177, SERPINE2
GOBP	GOBP_IMMUNE_RESPONSE_REGULATING_SIGNALING_PATHWAY	0.000277819	0.00344848	0.498493	0.32476	1.54249	315	TLR5, HCK, FGR, TNIP2, TREM2, FPR3, FPR1, LGALS3, FCGR2B, NECTIN2, NOD2, FPR2, LILRB4, CD300A, FCN1, IRAK3, LY96, CD300LF, CLEC7A, TLR2, CD14, CTSS, FLOT1, NFAM1, SH2B2, LYN, SRC, C5AR1, ACOD1, C3AR1, PLSCR1, TYROBP, FCER1G, SLC46A2, TLR8, TLR4, CD36, SCIMP, TNFRSF21, PRAM1, NR1H3, TLR6, C5AR2, TLR1, CMKLR1, YES1, PIK3AP1, BMX, RNF135, UNC93B1, SLC15A3, CYBA, LILRA2, MAPKAPK3, LACC1, MYD88, PTPN2…
GOBP	GOBP_NITROGEN_COMPOUND_TRANSPORT	0.000277917	0.00344848	0.498493	0.254451	1.29931	1462	CLU, ALOX5, WLS, MYO7A, TRPM4, RAB3D, AQP3, GLUL, AQP9, SNX10, RAB20, SLC47A1, TREM2, S100A8, ABCC4, STEAP3, ARRDC4, STOM, ZMAT3, MGST1, RAB31, MSR1, SLC11A1, SLC46A1, SLC1A3, MVP, ATG10, SLC7A7, SCARB2, PSAP, ZDHHC14, ITGAM, SLC43A3, PGAP1, ICA1, SLC22A4, HFE, LRP1, BCL3, AP2A1, STX11, RRBP1, P2RX1, DAB2, TLR2, RHOU, RHBDF2, FKBP1B, RHAG, GPR27, TSPO, FLOT1, KIF13A, SLC35E3, LYN, IGF2BP3, SRC, S…
GOBP	GOBP_IMMUNE_SYSTEM_DEVELOPMENT	0.000281254	0.00348243	0.498493	0.278875	1.39537	723	BATF, JAG2, CCR2, SOD2, VNN1, SNX10, RASGRP4, TREM2, LGALS3, SBNO2, FCGR2B, TMEM176B, OSM, BVES, MERTK, TNFAIP6, HLX, LILRB4, SPI1, MAPK11, HES1, GATA2, FES, FGL2, IRAK3, SCIN, CTSL, BCL3, TLR2, MPIG6B, NOTCH2, CSF3R, IL18, LIF, RHAG, JAG1, LTBR, TEK, NFIL3, TRIB1, GFI1B, NFAM1, CCL3, LYN, OSCAR, IL10, KCNQ1, ETV6, G6PD, SRC, TNFRSF11A, ACOD1, MMP9, MAFB, TYROBP, FCER1G, TCIRG1, SLC46A2, TNFSF13B…
GOBP	GOBP_NEGATIVE_REGULATION_OF_CALCIUM_ION_TRANSPORT_INTO_CYTOSOL	0.000281234	0.00348243	0.498493	0.797392	1.92469	9	FKBP1B, GSTO1, CALM3, TMBIM6, FKBP1A, SRI
GOBP	GOBP_NEGATIVE_REGULATION_OF_ENDOCYTOSIS	0.000281506	0.00348243	0.498493	0.573221	1.95174	37	LGALS3, MCTP1, CD300A, ITGAV, SDCBP, NR1H3, ANXA2, APP, SNX33, ANKRD13D, PICALM, PSEN1, RABGEF1, ABCA7, LRRTM2, SYT11, SCAMP5
bioplanet	bioplanet_Thromboxane A2 receptor signaling	0.000281983	0.00348481	0.498493	0.533714	1.92034	45	HCK, FGR, MAPK11, LYN, SRC, DNM1, GNAQ, YES1, PRKACA, GNA15, ICAM1, PTGIR, PRKCD, SYK, GNB1, GNA11, PLCB2, TGM2, AKT1, ARRB2
bioplanet	bioplanet_Transport of mature mRNAs derived from intronless transcripts	0.000285561	0.00352547	0.498493	-0.543168	-2.0288	33	NUP107, NUP160, NUP43, RAE1, NUP54, NUP35, NXF1, XPO1, NUP88, NUP155, RANBP2, NUP62, RAN, NUP133, NUP210, ALYREF
GOBP	GOBP_RECOMBINATIONAL_REPAIR	0.000286098	0.00352854	0.498493	-0.330262	-1.65232	142	WDR48, RPA2, ING3, RIF1, MRE11, RAD21, HELQ, BLM, CDC7, FANCM, BRD8, VPS72, FAN1, ERCC4, SWSAP1, RNF138, EPC1, SHLD3, AP5Z1, FANCB, RFWD3, ARID2, SETD2, SFPQ, TERF2IP, MAGEF1, ATM, SLX4, HDGFL2, NABP1, MMS19, SMCHD1, RAD51C, YEATS4, MCM9, SFR1, FBH1, WRAP53, ERCC6, POLQ, TOP3A, MCM7, POGZ, HUS1B, SHLD1
REACTOME	REACTOME_PROCESSING_OF_INTRONLESS_PRE_MRNAS	0.000286575	0.00353086	0.498493	-0.687952	-2.1064	17	CSTF2T, CPSF7, WDR33, CLP1, NUDT21, CSTF1, CSTF3, PAPOLA
GOBP	GOBP_PROTEASOME_MEDIATED_UBIQUITIN_DEPENDENT_PROTEIN_CATABOLIC_PROCESS	0.000288054	0.00354553	0.498493	-0.26257	-1.45863	356	SMAD7, BAG5, FBXL14, BIRC2, FBXL4, SIAH2, RNF103, HECTD1, CDC23, TAF1, WAC, SKP2, SOCS5, GID4, FBXL3, SMURF2, SIRT1, FBXL5, FBXO33, FBXW8, TLK2, RMND5A, RNF122, UBE2J1, ITCH, SPOP, TOPORS, UBXN7, DNAJB2, TRIB3, NEDD4, APPBP2, FBXO38, KBTBD7, KLHDC1, GSK3B, FAM8A1, TBX21, PIAS1, FBXW4, MKRN2, ASB2, FBXL20, AXIN1, KLHDC2, BTRC, CUL3, ARIH2, CCAR2, BBS7, ERLEC1, USP14, ARMC8, NKD2, RFFL, UBE4A, RNF1…
GOBP	GOBP_REGULATION_OF_PROTEIN_LOCALIZATION_TO_MEMBRANE	0.000288823	0.00355127	0.498493	0.389409	1.67803	131	TREM2, STOM, LGALS3, TNFAIP6, ITGAM, LRP1, DAB2, PRKCI, ABI3, STAC3, IQSEC2, ATP2C1, RHOQ, EPHB2, PID1, PGRMC1, GSN, BCL2L1, CIB1, PICALM, ITGB1BP1, RHOG, TNF, CDK5, ZDHHC7, PDZK1, ITGB2, GRIPAP1, NUMB, STX3, TMBIM1, AP2M1, MYO1C, AKT1, CEMIP, SLC7A11, RAP1A, RER1, ACTB, PTPN9, GDI1, CD81, PDCD5, ITGB1, WNK3, AP2B1, VIL1, PPP1R9B, MESD, CLTC, DMTN, TMEM59
REACTOME	REACTOME_NOREPINEPHRINE_NEUROTRANSMITTER_RELEASE_CYCLE	0.000289101	0.00355127	0.498493	0.796837	1.92335	9	MAOA, UNC13B, PPFIA3, STX1A, PPFIA4, SLC18A2
GOBP	GOBP_MITOCHONDRIAL_GENE_EXPRESSION	0.000290663	0.00356688	0.498493	-0.370445	-1.71103	91	FASTKD1, MTO1, FASTKD5, PRKAA1, MTERF2, NGRN, TARS2, MTERF4, TFAM, TSFM, YARS2, MRPL44, MTERF1, GFM1, FASTKD2, TRMT10C, TRMT5, MRPS6, MTRES1, PTCD3, CDK5RAP1, ALKBH1, RCC1L, RARS2, EARS2, FASTKD3, NOA1, QRSL1, TRMT61B, POLRMT, PNPT1, MRPS16, TWNK, AARS2, NSUN3, MTRF1, SUPV3L1, MRPS7
HALLMARK	HALLMARK_ALLOGRAFT_REJECTION	0.000301993	0.00370221	0.498493	0.385552	1.7083	156	CCR2, FGR, STAB1, FCGR2B, TIMP1, IGSF6, SPI1, IFNGR2, CCL2, BCL3, TLR2, IL18, LIF, NCF4, CTSS, LYN, IL10, MMP9, CAPG, CFP, CCR1, PF4, TLR6, TLR1, CCL7, HIF1A, IFNGR1, IL1B, NLRP3, IFNAR2, ICAM1, HCLS1, IL6, TNF, NCR1, ITGB2, EIF3A, CD86, CCR5, EREG, ST8SIA4, PTPN6, IL18RAP, RIPK2, AKT1, IL2RA, GALNT1, GCNT1, UBE2D1, IL7, ELF4, INHBB, CD4, IL15, RARS1, PSMB10, WAS, RPS9, CD74
GOBP	GOBP_DNA_DEPENDENT_DNA_REPLICATION	0.000302645	0.0037065	0.498493	-0.330087	-1.65032	141	CHTF18, SENP2, ORC4, TERF2, MRE11, KAT7, WRNIP1, BLM, EME1, RFC5, ETAA1, CDC7, FANCM, GINS3, PCNA, SMARCAL1, TERF1, ZNF830, DDX23, RFWD3, ZGRF1, RRM1, PRIMPOL, CIZ1, DBF4, UPF1, ORC6, POLE3, POLD1, DNAJA3, ORC5, MCM9, PRIM2, FBH1, TOPBP1, RRM2B, DBF4B, POLQ, MCM7, MCMBP, CDK9, TWNK, RFC4, RPAIN, EXD2, POLA1, ALYREF, TRAIP, SRPK2, NOC3L, FBXO5, METTL4
GOBP	GOBP_CELL_CYCLE_G2_M_PHASE_TRANSITION	0.00030383	0.00370723	0.498493	-0.348995	-1.73663	127	PPM1D, SYF2, SKP2, USP47, FBXL3, USH1C, DYRK3, MTA3, MRE11, RAD21, BLM, CDC7, UIMC1, LATS1, NPM1, ZNF830, RRM1, AKAP8L, VPS4B, CCNG1, TP53, FOXN3, ATM, AKAP8, PLK3, NABP1, RAD51C, FZR1, BRSK1, FHL1, RAD17, TOPBP1, RRM2B, DBF4B, CCNQ, HUS1B, LCMT1, TAF2, FBXL22, NAE1, MIIP, PPME1, RINT1, PINX1, CDC14B, PAXIP1, CDC25C, TAOK2, GPR132, CTC1, CDC25B, SIN3A, FBXO5, MASTL, KHDRBS1, STOX1, FOXO4, ING4, C…
bioplanet	bioplanet_Signaling events mediated by VEGFR1 and VEGFR2	0.000303387	0.00370723	0.498493	0.483029	1.84087	63	GRB10, VCL, MAPK11, FES, ITGAV, MYOF, CAMKK2, SRC, PXN, VEGFA, PRKACA, CTNNA1, IQGAP1, MAP2K3, PTPN2, PRKCD, CALM3, MAPKAPK2, PTK2, PTPN6, PTPRJ, MAPK3, AKT1, GAB1, RHOA, NOS3, CBL, MAP2K1, GRB2, NCK2
GOBP	GOBP_NEGATIVE_REGULATION_OF_MOLECULAR_FUNCTION	0.000303316	0.00370723	0.498493	0.283414	1.41834	715	CCL23, CCR2, TFPI, CSTA, SERPINA1, HMOX1, LGALS3, PLAUR, THBS1, SERPINB1, MVP, NOD2, CTSB, ANXA3, SPINT1, TIMP1, PYCARD, LILRB4, CD300A, SPI1, GPRC5A, ZFYVE28, HES1, PZP, IRAK3, HFE, LRP1, BCL3, ITGAV, NOL3, NAIP, DAB2, PRKAR2B, FKBP1B, SERPINE1, TRIB1, HGF, SPRED1, LYN, IL10, SRC, ACOD1, RENBP, MMP9, PTPN1, ZNF462, SPRY1, P2RY13, ANXA5, ECM1, GEM, PTX3, CEBPA, GNAQ, VEGFA, ATP2A2, GPR35, APLP2, …
REACTOME	REACTOME_METABOLISM_OF_CARBOHYDRATES	0.000303916	0.00370723	0.498493	0.355197	1.62411	209	PYGL, HK3, HK2, PAPSS2, ALDH1A1, SLC37A2, ENO1, CHST15, VCAN, B4GALT5, G6PD, SDC3, PGD, GALK1, GNPDA1, ARSB, PFKFB3, GNS, MANBA, PFKFB4, PRKACA, TKT, TALDO1, SGSH, GALNS, GAPDH, FUT7, HEXB, GAA, SORD, PPP2CB, PGAM1, TPI1, PGK1, GYG1, GLB1, SDC2, HEXA, PFKL, G6PC3, HK1, STAB2, HGSNAT, GBE1, ST3GAL4, NDC1, PCK2, UGP2, CHST11, CD44, GALE, ADPGK, CEMIP, PFKP, HYAL3, ST3GAL6, ST3GAL2, SLC9A1, AKR1A1, …
GOBP	GOBP_POSITIVE_REGULATION_OF_SYNAPTIC_TRANSMISSION	0.000305268	0.00372002	0.498493	0.446352	1.78847	83	CX3CR1, CCR2, GLUL, SLC1A3, RETN, CCL2, LGMN, FLOT1, NRGN, TYROBP, NPTN, GRIN2C, GFAP, APP, EPHB2, STX1A, RIMS3, NCSTN, TNF, CDK5, SERPINE2, RAPSN, LRRTM2, APOE, STX3, PTGS2
GOBP	GOBP_REGULATION_OF_OSTEOCLAST_DIFFERENTIATION	0.000307297	0.00374102	0.498493	0.530974	1.89103	43	TREM2, TNFAIP6, LILRB4, NOTCH2, CCL3, MAFB, TYROBP, TLR4, CCR1, CEBPB, ESRRA, TNF, MITF, PPARGC1B, KLF10, TCTA, TFE3
GOBP	GOBP_MACROMOLECULE_CATABOLIC_PROCESS	0.000310032	0.00377056	0.498493	-0.201441	-1.25384	1074	SMAD7, CNOT8, SUFU, PYHIN1, BAG5, TENT5C, FBXL14, USP13, TNFAIP3, ZC3HAV1, SMAD3, SMG8, BIRC2, MYLIP, FBXL4, SIAH2, PITHD1, SLFN13, RNF103, PDE12, GTPBP1, PHAX, HECTD1, CDC23, TAF1, WAC, FASTKD1, SKP2, HNRNPU, SOCS5, HNRNPA0, USP47, GID4, CNOT6L, FBXL3, ZFP36L2, SMURF2, RNF139, GZMB, SIRT1, CASC3, RNF26, CSDE1, FBXL5, FASTKD5, RHBDF1, TENT2, USP20, FBXO33, FBXW8, KLHL3, STAM, TLK2, PLK2, RMND5A, …
GOBP	GOBP_RESPONSE_TO_ZINC_ION	0.00031237	0.00379523	0.498493	0.604271	1.96379	29	SOD2, S100A8, TSPO, LTA4H, MT1X, MT2A, PAM, MT1E, SLC30A1, ALAD
GOBP	GOBP_NUCLEOTIDE_EXCISION_REPAIR	0.000314395	0.00381606	0.498493	-0.457053	-1.90713	51	XPC, SIRT1, RPA2, KAT7, SLC30A9, FAN1, ERCC4, USP7, POLK, TP53, SLX4, MMS19, FANCC, RNF111, POLD1, XAB2, ERCC6, GTF2H2, HUS1B, BRIP1, POLA1, ERCC3, GTF2H1
GOBP	GOBP_CALCIUM_MEDIATED_SIGNALING	0.000316116	0.00383314	0.498493	0.387157	1.68076	137	NRG1, CX3CR1, TRPM4, CCR2, SELP, TREM2, SPHK1, FPR2, MCTP1, CCL20, CLEC7A, FKBP1B, AZU1, CAMKK2, CCL3, P2RY12, CCR1, TPCN2, ATP2A2, CMKLR1, GRIN2C, PRKACA, PLEK, CCRL2, SLC8A1, GSTO1, TMEM38B, CALM3, TRPM2, SYK, CIB1, CXCR1, HTT, TNF, MCOLN1, CCR5, CXCL8, LAT2, TMEM38A, BTK, PTPRJ
GOBP	GOBP_MAST_CELL_ACTIVATION_INVOLVED_IN_IMMUNE_RESPONSE	0.000317526	0.00384263	0.498493	0.558594	1.92029	38	ADGRE2, FGR, HMOX1, CD300A, GATA2, FES, LYN, ADORA2B, GAB2, PTGDS, SYK, RABGEF1, STXBP2, PTPN6, LAT2, BTK
GOBP	GOBP_POSITIVE_REGULATION_OF_CYSTEINE_TYPE_ENDOPEPTIDASE_ACTIVITY	0.000317458	0.00384263	0.498493	0.418441	1.74578	110	S100A9, S100A8, MEFV, CTSD, DAPK1, CASP4, PYCARD, CARD9, P2RX1, CLEC7A, LGMN, CASP1, NLRC4, F3, NLRP3, HIP1, ACER2, APAF1, NLRP12, GSN, SYK, TTBK1, IFT57, TNF, AIM2, IFI16, ANP32B, MTCH1, RIPK2, BAD, CTSH, NLRP1, DAP, CASP5, BID, MAP3K5, BCAP31, PDCD5, RHOA, VCP, HSPD1, CASP9, PPM1F, NLRP2, ASPH
GOBP	GOBP_ACTIN_CYTOSKELETON_REORGANIZATION	0.000318503	0.00385064	0.498493	0.442359	1.76808	82	HCK, NRP1, CDC42BPA, FES, BAIAP2, NOTCH2, TEK, PTPN1, BRSK2, ABI3, CSF1R, ATP2C1, PLEK, CDC42BPB, CTTN, GSN, PHPT1, PAK1, PLEC, TRPM2, ESAM, HCLS1, CDK5, PARVG, MICALL2, EPS8, GMFG, RAP2A, ARHGDIA, GAB1, RHOA, PHACTR1, S1PR2, SHC1, GRB2, DMTN, BAIAP2L2, ARAP1, ANXA1, CLDN3
REACTOME	REACTOME_EPH_EPHRIN_MEDIATED_REPULSION_OF_CELLS	0.000319973	0.0038646	0.498493	0.570949	1.94401	37	AP2A1, LYN, SRC, MMP9, DNM1, YES1, EPHB2, PSENEN, MMP2, ACTG1, NCSTN, CLTB, PSEN1, VAV3, AP2M1, AP2S1, AP2A2, ACTB, EFNA1, AP2B1, CLTC, PSEN2, CLTA, APH1A, APH1B
GOBP	GOBP_MITOTIC_DNA_INTEGRITY_CHECKPOINT_SIGNALING	0.000322896	0.00389606	0.498493	-0.409799	-1.8358	74	XPC, WAC, SYF2, PLK2, RPA2, MRE11, CDKN1B, BLM, EME1, UIMC1, SDE2, ZNF830, RFWD3, CCNG1, TP53, FOXN3, ATM, GIGYF2, PLK3, RAD9A, TRIAP1, MSH2, FZR1, BRSK1, ATF2, RAD17, TOPBP1, FBXO31, MDC1, HUS1B, NAE1, RINT1, CDC14B, TAOK2
GOBP	GOBP_REGULATION_OF_NEUROTRANSMITTER_RECEPTOR_ACTIVITY	0.00032447	0.0039112	0.498493	0.587317	1.95253	32	CCR2, DAPK1, IFNGR2, CCL2, NPTX2, SRC, SLC6A9, APP, EPHB2, ADRB2, CAPN1
GOBP	GOBP_REGULATION_OF_PLASMA_LIPOPROTEIN_PARTICLE_LEVELS	0.000327937	0.00394911	0.498493	0.537943	1.89149	41	TREM2, HMOX1, MSR1, LDLR, LIPA, SOAT1, DGAT2, LPL, CD36, PRKACA, LPCAT3, ANXA2, PLA2G7, DGAT1, ABCA7, APOE, MFSD2A, ABCA1
bioplanet	bioplanet_HIV life cycle	0.000328994	0.00395795	0.498493	-0.367387	-1.76254	103	CXCR4, TAF1, NUP107, NUP160, NMT2, NUP43, NELFA, TBP, XRCC6, POLR2D, RAE1, NUP54, PSIP1, NUP35, CCNT2, TAF11, XPO1, NELFCD, CDK7, CCNT1, POLR2C, TAF5, SUPT16H, NUP88, POLR2B, SUPT4H1, UBB, GTF2H2, NUP155, RNGTT, CDK9, RANBP2, NMT1, NUP62, VPS37A, RAN, RANGAP1, NUP133, NUP210, GTF2B, VPS37B, CCNH, ERCC3, GTF2H1
bioplanet	bioplanet_RNA polymerase III transcription	0.000332052	0.00399081	0.498493	-0.514715	-2.04486	40	MATR3, GTF3C5, SNAPC5, ZNF143, BRF2, TBP, POLR1D, POLR3D, GTF3C4, NR3C1, GTF3A, GTF3C2, SFPQ, BRF1, SNAPC4, POLR3B, POLR3C, POLR3A, GTF3C3, NFIX, SNAPC1, SNAPC3, POLR3F, POLR2H, POLR3E
GOBP	GOBP_CELL_CELL_JUNCTION_ORGANIZATION	0.000332979	0.00399412	0.498493	0.387343	1.66913	131	CD9, CLDN5, VCL, SRC, PRKCI, RAB13, ZNF703, MTSS1, VEGFA, CSF1R, BMP6, PRKACA, CTNNA1, EPB41L3, EPHB2, IL1B, GJB2, GJB6, PLEC, TGFBR1, TLN1, CTNND1, ESAM, ACTG1, TNF, RAMP2, CD177, PARD3, MICALL2, OCEL1, SNAI1, NUMB, AFDN, WDR1, CLDN4, MYO1C, RDX, LIMS2, ACTB
GOBP	GOBP_OXIDATIVE_PHOSPHORYLATION	0.000332935	0.00399412	0.498493	0.436522	1.79596	93	NDUFS8, AK4, PPIF, NDUFV2, TNF, ANTKMT, NDUFB7, COX4I1, NDUFB2, MLXIPL, NDUFS6, ATP5F1E, ATP5F1D, NDUFA8, NDUFS3, UQCRH, SDHC, FXN, COX5A, BID, NDUFV1, ATP5MG, NDUFB3, RHOA, NDUFB8, VCP, ATP5PO, NDUFA9, NDUFS7, ATP5F1B, PARK7, ATP5PB, UQCC2, UQCRB, NDUFC2, ATP7A, ABCD1, NDUFA10, ATP5PD, ATPSCKMT, NDUFAB1, UQCRC1, NDUFB5, COX7A1, DNAJC15, GHITM, NDUFS4, NDUFS1, CHCHD10, NIPSNAP2, NDUFB10, COX15, N…
GOBP	GOBP_DNA_TEMPLATED_TRANSCRIPTION_ELONGATION	0.000335347	0.00401859	0.498493	-0.422027	-1.86958	69	SCAF8, ZMYND11, HNRNPU, CDK13, TCEA2, HEXIM1, KAT7, NELFA, AXIN1, CDC73, TSFM, CBX7, CCAR2, PCID2, PAF1, SETD2, CCNT2, ELP2, CCNK, NELFCD, LDB1, CCNT1, SUPT16H, EAPP, ERCC6, SUPT4H1, CTR9
GOBP	GOBP_NUCLEAR_EXPORT	0.000338758	0.00405157	0.498493	-0.335668	-1.6819	132	RIOK2, PHAX, NUP107, NUP160, CTDSPL2, CPSF6, XPOT, NSUN2, DUSP16, TSC1, THOC3, POLDIP3, SMG5, GSK3B, ABCE1, FYTTD1, POLR2D, UPF2, FRAT1, RAE1, NPM1, DHX9, SMG7, HSPA9, PCID2, CHTOP, EIF4ENIF1, NXF1, SETD2, SMG6, AKAP8L, XPO5, ALKBH5, NUP42, ZC3H11A, XPO1, UPF1, XPO6, NOP9, NMD3, YTHDC1, NOL6, WASHC4, NXT1, NUP88
PID	PID_VEGFR1_2_PATHWAY	0.000338761	0.00405157	0.498493	0.476035	1.81309	62	GRB10, VCL, MAPK11, FES, ITGAV, MYOF, CAMKK2, SRC, PXN, VEGFA, PRKACA, CTNNA1, IQGAP1, MAP2K3, PTPN2, PRKCD, MAPKAPK2, PTK2, PTPN6, PTPRJ, MAPK3, AKT1, GAB1, RHOA, NOS3, CBL, MAP2K1, GRB2, NCK2
BIOCARTA	BIOCARTA_COMP_PATHWAY	0.000339197	0.00405282	0.498493	0.855438	1.89253	7	C1QB, C1QC, CFD, C3
GOBP	GOBP_REGULATION_OF_CHROMATIN_ASSEMBLY	0.000341355	0.00407464	0.498493	-0.6095	-2.06006	24	RESF1, SPTY2D1, PIK3CA, TASOR, MORC2, ATF7IP2, ZNF304, ATF7IP, LMNTD2, SETDB2, PHF2, CTR9, TRIM28, PPHLN1, SIN3A, ZNF445, PHF8, TET1
GOBP	GOBP_AMYLOID_BETA_CLEARANCE_BY_CELLULAR_CATABOLIC_PROCESS	0.000346792	0.0041355	0.498493	0.886956	1.86423	6	TREM2, LDLR, LRP1, CD36, ABCA7
KEGG	KEGG_METABOLISM_OF_XENOBIOTICS_BY_CYTOCHROME_P450	0.00034959	0.00415972	0.498493	0.642446	1.93067	21	ALDH3B1, MGST1, CYP3A5, MGST2, AKR1C1, GSTP1, CYP1B1, GSTO1, MGST3
KEGG	KEGG_ARACHIDONIC_ACID_METABOLISM	0.000349842	0.00415972	0.498493	0.628451	1.99934	25	ALOX5, PTGES, TBXAS1, LTA4H, CBR1, ALOX12, PTGDS, PTGES2, GPX1, GGT5, PLA2G4A, CYP2J2, PTGS2, EPHX2, PLA2G6
bioplanet	bioplanet_Arachidonic acid metabolism	0.000349842	0.00415972	0.498493	0.628451	1.99934	25	ALOX5, PTGES, TBXAS1, LTA4H, CBR1, ALOX12, PTGDS, PTGES2, GPX1, GGT5, PLA2G4A, CYP2J2, PTGS2, EPHX2, PLA2G6
REACTOME	REACTOME_INTERACTIONS_OF_VPR_WITH_HOST_CELLULAR_PROTEINS	0.000350399	0.0041623	0.498493	-0.550336	-2.00444	31	NUP107, KPNA1, NUP160, NUP43, RAE1, NUP54, PSIP1, SLC25A4, NUP35, NUP42, NUP88, NUP155, RANBP2, NUP62, NUP133, NUP210
GOBP	GOBP_NEGATIVE_REGULATION_OF_PROTEIN_METABOLIC_PROCESS	0.000352157	0.00417667	0.498493	0.274243	1.37299	746	CLU, NRG1, ENG, TFPI, CSTA, SERPINA1, TREM2, LGALS3, PLAUR, THBS1, SERPINB1, MVP, CTSB, SPINT1, DAPK1, TIMP1, PYCARD, LILRB4, CD300A, SPI1, GPRC5A, LDLR, ZFYVE28, PZP, IRAK3, HFE, LRP1, QRICH2, ITGAV, NOL3, DUSP6, NAIP, PRKAR2B, FKBP1B, SERPINE1, NXN, TSPO, TRIB1, HGF, SPRED1, LYN, IGF2BP3, IL10, G6PD, SRC, RENBP, MMP9, SDCBP, PTPN1, SPRY1, HBEGF, ECM1, RTN1, SPAG9, CTSA, ANG, PTX3, NR1H3, CEBPA,…
bioplanet	bioplanet_Recycling pathway of cell adhesion molecule L1	0.000352291	0.00417667	0.498493	0.610317	1.95462	26	AP2A1, SRC, DNM1, RPS6KA4, NUMB, AP2M1, AP2S1, MSN, AP2A2, RDX, L1CAM, RPS6KA2, DPYSL2, AP2B1, CLTC, CLTA
GOBP	GOBP_NLS_BEARING_PROTEIN_IMPORT_INTO_NUCLEUS	0.000355439	0.00420992	0.498493	-0.74584	-2.09937	12	KPNA1, NUP54, NUP35, KPNB1, KPNA2, CBLB, KPNA5, RANBP2, KPNA4, KPNA3
GOBP	GOBP_REGULATION_OF_SENSORY_PERCEPTION	0.000357844	0.00423431	0.498493	0.733844	1.98803	13	PTAFR, CCL3, IL10, IL1A, ACP3, MGLL, FABP5, EDN1, SLC9A1
GOBP	GOBP_ANATOMICAL_STRUCTURE_HOMEOSTASIS	0.000359061	0.00424461	0.498493	0.366849	1.65231	184	RAB3D, CCR2, SNX10, NOD2, ALDH1A1, CLDN5, VCL, GATA2, P2RX1, LAMC1, LIPA, SRC, TNFRSF11A, LYZ, TCIRG1, TLR4, VEGFA, COMP, CSF1R, HIF1A, LAMP2, CDH23, P2RY1, CAPN3, NOTCH1, TPP1, GAA, ADRB2, GJB6, ADAM8, SYK, ESAM, IL6, ACTG1, SPP1, PPARGC1B, CDK5, RDH12, BAG3, PDK4, PRDX1, CCDC154, PTGS2, OAS1, MFSD2A, CHMP4B, CTSH, ACTB, P2RX4, POC1B, MKS1, CLN8, HSPB1, FGGY, IL7, LOX, ITGB1, WNK3, MAK, YAP1, GC…
REACTOME	REACTOME_ADORA2B_MEDIATED_ANTI_INFLAMMATORY_CYTOKINES_PRODUCTION	0.000362395	0.0042799	0.498493	0.476225	1.80726	59	ADM, HTR7, GNB4, PRKAR2B, GPR27, PTGER2, ADORA2B, GPR84, PRKACA, GNG11, ADCY4, ADRB2, HRH2, PTGIR, GNB1, IL6, RAMP2, GNG5, CYSLTR2, GNB2, GNAI1, RAMP1
REACTOME	REACTOME_MUSCLE_CONTRACTION	0.000367267	0.00433325	0.498493	0.417668	1.74001	105	DYSF, ITGB5, GUCY1B1, KCNK13, VCL, GUCY1A1, FKBP1B, KCNQ1, PXN, MYLK, ATP2A2, TPM4, MYL12B, DES, PRKACA, ANXA2, SLC8A1, KCNK6, MYL9, ATP1B3, KCND1, VIM, ACTA1, PAK1, SCN1B, TLN1, KCNJ2, MYL6B, RYR1, TPM3, SRI, ATP1A1, KCNE3, MYL4, KCNK5, SCN3B
REACTOME	REACTOME_INTERLEUKIN_1_SIGNALING	0.000372431	0.00438995	0.498493	0.431427	1.78782	96	S100A12, TNIP2, NOD2, IL1RAP, IRAK3, IL1R1, IL1RN, IL1A, MAP3K8, APP, IL1B, MYD88, PSMD13, PSMB3, IL1R2, PELI3, RBX1, PSMB5, PSMB6, PSME2, PSMD1, TOLLIP, PSMB9, SEM1, RIPK2, PSMD2, PSMC1, PELI2, PSMB7, PSME4, IRAK1, PSMB2, PSMD14, PSMB10, MAP2K1, IKBKG, PSMB4, PSMA5, MAP2K4, PSMB8, PSMA4, PSMD4, NKIRAS2
GOBP	GOBP_CARDIAC_NEURAL_CREST_CELL_DIFFERENTIATION_INVOLVED_IN_HEART_DEVELOPMENT	0.000375633	0.00442344	0.498493	0.792945	1.91396	9	ENG, HES1, JAG1, SEMA3C, MAPK3, EDN1, CITED2
GOBP	GOBP_REGULATION_OF_APOPTOTIC_CELL_CLEARANCE	0.0003762	0.00442586	0.498493	0.853063	1.88728	7	TREM2, CCL2, CD300LF, C3, ABCA7, TGM2
REACTOME	REACTOME_SEMAPHORIN_INTERACTIONS	0.000378422	0.0044448	0.498493	0.496909	1.84439	53	MYH14, TREM2, NRP1, FES, TYROBP, PLXNC1, SEMA4A, MYL12B, CFL1, MYL9, RHOB, PAK1, MYH10, RRAS, TLN1, CDK5, LIMK2, LIMK1, PLXND1, ARHGEF12, ARHGEF11, PLXNA2, MET, RHOA, DPYSL2, ITGB1, MYL6, PAK3
GOBP	GOBP_ENDOTHELIAL_CELL_PROLIFERATION	0.000378536	0.0044448	0.498493	0.428405	1.74587	89	ALOX5, HMOX1, NRP1, EGFL7, THBS1, TNFSF12, GATA2, CCL2, TEK, IL10, ECM1, ANG, VEGFA, HIF1A, BMP6, F3, SPARC, CYBA, TGFBR1, NRP2, ITGB1BP1, TNF, ADAM17, STAT3, MIR29A, APOE, PIK3CB, AKT1
GOBP	GOBP_DETECTION_OF_STIMULUS	0.000381159	0.00447131	0.498493	0.418075	1.7384	103	SOD2, TREM2, NOD2, KCNMB1, LY96, CLEC7A, NAIP, TLR2, TSPO, KCNQ1, TLR4, NLRC4, ITGA2, GNAQ, TLR6, TLR1, NR2F6, NLRP3, FFAR4, BEST1, PAK1, CALM3, CADM1, TNF, GNA11, PTK2, SERPINE2, PLCB2, PTPRJ, PIEZO1
GOBP	GOBP_REGULATION_OF_NEUTROPHIL_DEGRANULATION	0.000382933	0.00448783	0.498493	0.827155	1.91229	8	PTAFR, ITGAM, SPI1, PRAM1, SYK, ITGB2, CD177
GOBP	GOBP_RESPONSE_TO_ABIOTIC_STIMULUS	0.000384051	0.00449663	0.498493	0.276533	1.38542	749	TLR5, ADM, PTAFR, ENG, AQP3, SOD2, AQP9, CYFIP1, TNFRSF8, TREM2, PLAU, HMOX1, THBS1, SLC1A3, HK2, TIMP1, MMP1, TNFRSF1A, RETN, AIF1, KCNMB1, BCL3, ENO1, AGTRAP, PLOD1, FOSL1, LGMN, NOL3, IKBIP, TLR2, METRNL, CASP1, TMEM150C, CD14, LTBR, TIFAB, CTSS, TSPO, CYBB, MAP3K20, LYN, THBD, KCNQ1, ATP6V1A, SRC, TNFRSF11A, LPL, MMP9, NPTN, TLR8, TLR4, ITGA2, ANG, ARSB, ATP6V0D1, GNAQ, VEGFA, MYLK, IL1A, TRE…
REACTOME	REACTOME_SNRNP_ASSEMBLY	0.000386092	0.00451621	0.498493	-0.478966	-1.94535	46	PHAX, NUP107, NUP160, NUP43, DDX20, RAE1, NUP54, NUP35, NUP42, GEMIN5, NUP88, SNRPB, SMN1, NUP155, SNUPN, RANBP2, NUP62, NUP133, NUP210, GEMIN4, PRMT5
REACTOME	REACTOME_EXPORT_OF_VIRAL_RIBONUCLEOPROTEINS_FROM_NUCLEUS	0.000387559	0.00452904	0.498493	-0.558634	-1.98131	28	NUP107, NUP160, NUP43, RAE1, NUP54, NUP35, NUP42, XPO1, NUP88, NUP155, RANBP2, NUP62, RAN, NUP133, NUP210
GOBP	GOBP_HISTONE_H4_ACETYLATION	0.000388964	0.00454113	0.498493	-0.421051	-1.84288	64	KANSL2, KANSL1, JADE2, SIRT1, JADE1, ING3, KAT6A, APBB1, KAT7, PER1, BRD8, VPS72, EPC1, AUTS2, JADE3, TAF7, WDR5, LEF1, YEATS4, NCOA1, ATF2, HAT1, PHF20, ING5, HCFC1, MSL3, MSL1, KAT5, KAT8, KANSL3, ING4, MSL2, ATG5, BEND3, MORF4L1
bioplanet	bioplanet_SLC-mediated transmembrane transport	0.000392541	0.00457852	0.498493	0.376578	1.66841	155	SLC47A1, HK3, SLC31A1, SLC11A1, SLC1A3, SLC7A7, HK2, SLC39A4, SLC22A4, SLC22A15, RHAG, SLC39A1, SLC43A2, SLCO2B1, SLC16A3, SLC2A6, SLC2A5, SLC6A6, SLCO4A1, SLC6A9, SLC24A3, SLC8A1, SLC7A8, SLC15A3, SLC8B1, SLC1A2, SLC18A2, SLC35A2, SLC9A8, G6PC3, SLC30A1, HK1, SLC1A5, SLC29A3, SLC22A18, SLCO3A1, SLC2A8, SLC7A11, SLC36A1, SLC27A4, SLC7A9, SLC9A1, SLC5A11, SLC7A5
GOBP	GOBP_NEGATIVE_REGULATION_OF_LOCOMOTION	0.00040018	0.00466319	0.498493	0.355889	1.62376	206	NRG1, CX3CR1, ENG, EMILIN2, HMOX1, NRP1, THBS1, MCTP1, TNFAIP6, TIMP1, CD300A, CLDN5, AIF1, VCL, CCL2, LRP1, SERPINE1, JAG1, TRIB1, SPRED1, SEMA4A, C5AR2, PLCB1, KLF4, CTNNA1, CORO1C, CYP1B1, SEMA6B, ADAM15, SEMA3C, NOTCH1, DPP4, PTPN2, RHOB, ABHD2, RRAS, ITGB1BP1, NFE2L2, TNF, MITF, RABGEF1, CORO1B, ADTRP, CERS2, STAT3, AFDN, MIR29A, APOE, PTPRJ, CALR, LIMCH1, AKT1, PTPRK, PIN1, ARHGAP4, SRGAP2,…
KEGG	KEGG_AMINO_SUGAR_AND_NUCLEOTIDE_SUGAR_METABOLISM	0.000401051	0.00466889	0.498493	0.55384	1.90395	38	HK3, HK2, RENBP, GALK1, GNPDA1, NPL, CHIT1, HEXB, GMPPB, CYB5R1, NANS, HEXA, NAGK, HK1, UGDH, UGP2, GALE, GFPT2, GMPPA
GOBP	GOBP_ENSHEATHMENT_OF_NEURONS	0.00040321	0.00468867	0.498493	0.430158	1.78256	96	CLU, NRG1, CD9, CYFIP1, CLDN5, CTSC, TLR2, HGF, B4GALT5, SERINC5, TNFRSF1B, MARVELD1, TNFRSF21, EPB41L3, HEXB, PLEC, NCSTN, PMP22, ITGAX, TNF, SBF2, QKI, ARHGEF10, PARD3, EGR2, ILK, SIRT2, NDRG1, DHH, TG, AKT1
GOBP	GOBP_PROCESS_UTILIZING_AUTOPHAGIC_MECHANISM	0.000403516	0.00468867	0.498493	0.295927	1.44955	466	CLU, S100A9, DRAM1, UBXN2B, TREM2, S100A8, MEFV, HMOX1, WIPI1, STING1, ATP6V0D2, ATG10, NOD2, HK2, PSAP, DAPK1, PYCARD, TMEM150B, RRAGC, SPTLC2, TSPO, HGF, CAMKK2, ADPRH, IL10, ATP6V1A, SRC, TBC1D12, TCIRG1, CTSA, TPCN2, ARSB, ATP6V0D1, VMP1, ATP2A2, LGALS8, HIF1A, TRIM5, ATG7, PRKACA, RGS19, GFAP, CTTN, ATP6V0A1, LAMP2, QSOX1, SH3GLB1, ACER2, RAB39A, GAPDH, WDR45, RAB24, MAP1LC3A, WDFY3, WDR41, …
REACTOME	REACTOME_PROCESSING_OF_CAPPED_INTRONLESS_PRE_MRNA	0.000409518	0.00474486	0.498493	-0.582154	-1.96673	25	ZNF473, CSTF2T, CPSF7, WDR33, CLP1, NUDT21, CSTF1, CSTF3, PAPOLA
GOBP	GOBP_CELL_CYCLE_PHASE_TRANSITION	0.000409901	0.00474486	0.498493	-0.241573	-1.3661	422	RIOK2, GFI1, XPC, PLRG1, CDC23, TAF1, PPM1D, WAC, SYF2, SKP2, BTN2A2, USP47, CCNG2, FBXL3, ZFP36L2, USH1C, JADE1, SENP2, DYRK3, RGCC, RBL2, PLK2, RPA2, GSPT1, NSUN2, APBB1, MTA3, AMBRA1, MRE11, RAD21, BUB3, APPL2, ZW10, CDKN1B, APBB2, BLM, EME1, ETAA1, CENPJ, CDC7, UIMC1, CDC5L, CDC73, LATS1, CTDSP2, CUL3, NPM1, CDC26, FBXO7, CDC14A, CCAR2, TFAP4, PCID2, SDE2, HINFP, ZNF830, RFWD3, DDX3X, PAF1, R…
GOBP	GOBP_PEPTIDE_TRANSPORT	0.000409663	0.00474486	0.498493	0.379346	1.66565	147	ALOX5, TRPM4, GLUL, S100A8, ABCC4, MGST1, ICA1, HFE, FKBP1B, GPR27, IL1RN, TCIRG1, BRSK2, HIF1A, TCF7L2, RAB11FIP5, STX1A, SLC15A3, IL1B, SLC8B1, PIM3, FFAR4, ABCC1, TRPM2, KLF7, CHD7, IL6, TNF, PFKL, ACSL4, SRI, MAFA, PCK2, SMPD3, SLC7A11, ABCA1, BAD, EDN1, SIDT2, PLA2G6
GOBP	GOBP_SYNAPTIC_SIGNALING	0.000409821	0.00474486	0.498493	0.315126	1.51971	383	NRG1, CX3CR1, CCR2, GLUL, HTR7, CYFIP1, GUCY1B1, SLC1A3, MCTP1, DAGLB, RETN, IL1RAP, BAIAP2, CCL2, KCNMB1, CTBP2, STX11, P2RX1, LGMN, NPTX2, SEPTIN5, GUCY1A1, PRKAR2B, FLOT1, NRGN, DAGLA, SRC, SDCBP, TYROBP, UNC13B, NPTN, DNM1, GNAQ, STAC3, PLCB1, ATP2A2, SLC6A6, ADORA2B, IQSEC2, GRIN2C, SYN1, PRKACA, GFAP, FARP1, APP, PPFIA3, EPHB2, STX1A, IL1B, P2RY1, GNA15, PPT1, RIMS3, ADRB2, HRH2, APBA1, PDZ…
GOBP	GOBP_POSITIVE_REGULATION_OF_GLIOGENESIS	0.000410605	0.00474852	0.498493	0.525361	1.87104	43	SPINT1, HES1, TLR2, LIF, TSPO, LYN, PRKCI, TNFRSF1B, GFAP, IL1B, NOTCH1, TTBK1, IL6, TNF, SERPINE2, EGR2
REACTOME	REACTOME_MITOTIC_TELOPHASE_CYTOKINESIS	0.0004134	0.00477633	0.498493	-0.721693	-2.04541	13	STAG1, WAPL, STAG2, RAD21, PDS5B, PDS5A, MAU2
GOBP	GOBP_NEGATIVE_REGULATION_OF_INTERLEUKIN_1_PRODUCTION	0.000414356	0.00478286	0.498493	0.632277	1.98287	24	CX3CR1, TREM2, MEFV, SERPINB1, LILRB4, IL10, GSTP1, NLRP3, FFAR4, NLRP12, GAS6, IL1R2
GOBP	GOBP_CELLULAR_COPPER_ION_HOMEOSTASIS	0.000419229	0.00483082	0.498493	0.728559	1.97371	13	SLC31A1, SLC31A2, MT2A, APP, CCDC22, ANKRD9, ATOX1, COX19
GOBP	GOBP_MITOTIC_CELL_CYCLE	0.000419299	0.00483082	0.498493	-0.215137	-1.2761	709	RIOK2, SBDS, CHAMP1, SMARCA5, TUBE1, TUBA4A, LRP5, GFI1, XPC, PLRG1, CDC23, PPM1D, WAC, SYF2, SKP2, STAG1, HECA, BTN2A2, HNRNPU, PIBF1, USP47, CCNG2, FBXL3, ZFP36L2, TUBB2B, YTHDC2, MIS12, CCSAP, USH1C, SIRT1, JADE1, SENP2, ANK3, RGCC, BTG1, RBL2, CDK13, PLK2, LSM14A, LPIN1, WAPL, RPA2, STAG2, TUBGCP3, GSPT1, SUN2, MTA3, AMBRA1, MRE11, RAD21, TUBGCP5, BUB3, APPL2, ROCK2, SRSF2, NUMA1, THAP1, ZW10…
BIOCARTA	BIOCARTA_WNT_PATHWAY	0.000420823	0.00484381	0.498493	-0.629635	-2.10238	22	TLE1, MAP3K7, SMAD4, GSK3B, AXIN1, FRAT1, BTRC, HDAC1, DVL1, APC, PPARD, CREBBP, TAB1, CSNK2A1
GOBP	GOBP_VACUOLE_ORGANIZATION	0.000424392	0.00488031	0.498493	0.368395	1.63957	163	MYO7A, RAB20, UBXN2B, WIPI1, STING1, SCARB2, GRN, ADPRH, TBC1D12, TCIRG1, TPCN2, ARSB, VMP1, ATP2A2, TREX1, ATG7, ANXA2, SH3GLB1, RAB39A, PPT1, WDR45, MAP1LC3A, ACP3, HEXB, TPP1, GAA, ATG3, GABARAP, VPS35, LAMTOR1, SNX18, LAPTM4B, PSEN1, GBA, ATG16L2, TFEB, BAG3, ATP6AP2, RALB, SCFD1, NAGPA, GNPTAB, VPS16, TMEM165, RAB1B, CHMP4B, ABCA1
GOBP	GOBP_SPHINGOLIPID_BIOSYNTHETIC_PROCESS	0.000425005	0.00488277	0.498493	0.455401	1.7935	75	ALDH3B1, SPTSSA, SPHK1, UGCG, HACD4, P2RX1, SPTLC2, ASAH1, B4GALNT1, B4GALT5, ELOVL7, ACER2, A4GALT, SGMS2, PRKCD, GBA, SMPD2, ST8SIA4, CERS2, PPM1L, HACD2, ST6GALNAC4, ST3GAL2, CERKL, PLA2G6, CLN8, ST6GALNAC3, ORMDL2, B3GALT4, LARGE1, SMPD4, B4GALT4, PLPP1, ACER3, ALOXE3, TM9SF2
GOBP	GOBP_RELEASE_OF_SEQUESTERED_CALCIUM_ION_INTO_CYTOSOL_BY_ENDOPLASMIC_RETICULUM	0.000430401	0.00494013	0.498493	0.665821	1.99059	20	NOL3, FKBP1B, CCL3, PRKACA, SLC8A1, GSTO1, TMEM38B, CALM3, CHD7, RYR1, CCR5, SRI, TMEM38A
GOBP	GOBP_ANTIGEN_PROCESSING_AND_PRESENTATION_OF_EXOGENOUS_ANTIGEN	0.00043188	0.00495247	0.498493	0.623079	1.98224	25	FCGR2B, CTSD, CTSL, LGMN, IFI30, CTSS, FCER1G, CLEC4A
GOBP	GOBP_NEUTROPHIL_DEGRANULATION	0.000434613	0.00497915	0.498493	0.726657	1.96856	13	PTAFR, ANXA3, ITGAM, SPI1, PRAM1, SYK, STXBP2, ITGB2, CD177
WP	WP_GLYCOSAMINOGLYCAN_DEGRADATION	0.000442305	0.00506254	0.498493	0.725703	1.96598	13	ARSB, GNS, SGSH, GALNS, HEXB, GLB1, HEXA, HGSNAT
REACTOME	REACTOME_BINDING_AND_UPTAKE_OF_LIGANDS_BY_SCAVENGER_RECEPTORS	0.000444206	0.0050759	0.498493	0.646037	1.96012	22	MARCO, STAB1, MSR1, CD163, LRP1, CD36, SPARC, SCARF1, FTL, STAB2, APOE, CALR
GOBP	GOBP_REGULATION_OF_PH	0.000444302	0.0050759	0.498493	0.469449	1.80593	65	DMXL2, RAB20, SLC11A1, ATP6V0D2, GRN, MAFG, TCIRG1, ATP6V0D1, ATP6V0A1, RAB39A, PPT1, LACC1, ATP6AP1, SLC9A8, ATP6V0E1, TM9SF4, ATP6AP2, PDK4, TMEM165, MAPK3, EDN1, SLC9A1, ATP6V1H, ATP5F1B
GOBP	GOBP_MITOTIC_SISTER_CHROMATID_SEGREGATION	0.000451161	0.00514946	0.498493	-0.32509	-1.64627	150	RIOK2, CHAMP1, SMARCA5, CDC23, HNRNPU, PIBF1, MIS12, RAD21, BUB3, NUMA1, ZW10, DSN1, EML3, CUL3, CDC26, PTTG1, PCID2, PDS5B, PDS5A, MAU2, KPNB1, ZNF207, MAD2L1BP, AKAP8L, VPS4B, KIF22, BOD1, ATM, APC, AKAP8, CENPC, SLF2, KMT5A, CDK5RAP2, ANAPC1, MAD2L1, ANAPC4, POGZ, LCMT1, NUP62, RAN, CHMP2B, DIS3L2, PINX1, PSMG2, TNKS, NCAPH2, NSL1, FBXO5, KIF18A, EML4, NCAPG, USP44, ANAPC7, CDC6, BECN1, NAA10,…
KEGG	KEGG_DRUG_METABOLISM_CYTOCHROME_P450	0.000452472	0.00515962	0.498493	0.664675	1.98716	20	ALDH3B1, MGST1, MAOA, CYP3A5, MGST2, GSTP1, GSTO1, MGST3, FMO5
GOBP	GOBP_COPPER_ION_HOMEOSTASIS	0.000455398	0.00518815	0.498493	0.696126	1.96761	16	SLC31A1, SLC31A2, MT2A, APP, CCDC22, ANKRD9, ATOX1, COX19
GOBP	GOBP_NEGATIVE_REGULATION_OF_GENE_EXPRESSION_EPIGENETIC	0.0004574	0.00520612	0.498493	-0.428014	-1.87701	63	PPM1D, SIRT1, RESF1, RIF1, SMYD5, PIK3CA, TASOR, ASIP, EZH1, AXIN1, MORC2, EPC1, ATF7IP2, HDAC1, ZNF304, ATF7IP, RRP8, SMCHD1, POLE3, CTCF, SUV39H1, SETDB2, BAHD1, FAM172A, TRIM27, PHF2, CTR9, CBX3, TRIM28, SCMH1
GOBP	GOBP_REGULATION_OF_PROTEIN_LOCALIZATION_TO_CELL_PERIPHERY	0.000457994	0.00520803	0.498493	0.411907	1.70995	98	TREM2, LGALS3, LRP1, DAB2, PRKCI, ABI3, STAC3, IQSEC2, ATP2C1, RHOQ, EPHB2, PID1, PGRMC1, BCL2L1, CIB1, PICALM, RHOG, TNF, CDK5, ZDHHC7, GRIPAP1, NUMB, SAPCD2, STX3, TMBIM1, AP2M1, AKT1, RAP1A, GNAI1, RER1, ACTB, PTPN9
GOBP	GOBP_REGULATION_OF_EPITHELIAL_CELL_DIFFERENTIATION	0.000459362	0.00521874	0.498493	0.442349	1.77243	83	AQP3, VDR, TNFRSF1A, CLDN5, VCL, HES1, SERPINE1, LIF, JAG1, MAFG, SPRED1, MMP9, SPRY1, VEGFA, PLCB1, IL1A, BMP6, CEBPB, CDKN1C, IL1B, NOTCH1, KLF7, CD109, SPRY2, TNF
[truncated: 11,172 more rows]
