# Supplementary material for: BCL-2 Inhibition via Venetoclax at ART Initiation Induces Long-Term Reduction of the Intact SIV Reservoir
Source: Research Square preprint supplement (doi:10.21203/rs.3.rs-7060088/v1), 2025-07-14
Supplement: Supplementary file 2 [file 65ff2fc684401d127862087e.docx]

Data accessibility for reviewers

Instructions

To review GEO accession GSE301433:
Go to [https://nam11.safelinks.protection.outlook.com/?url=https%3A%2F%2Fwww.ncbi.nlm.nih.gov%2Fgeo%2Fquery%2Facc.cgi%3Facc%3DGSE301433&data=05%7C02%7Cgktharp%40emory.edu%7Cb3ca8704a2d444b4176608ddb96e8bfd%7Ce004fb9cb0a4424fbcd0322606d5df38%7C0%7C0%7C638870606621182459%7CUnknown%7CTWFpbGZsb3d8eyJFbXB0eU1hcGkiOnRydWUsIlYiOiIwLjAuMDAwMCIsIlAiOiJXaW4zMiIsIkFOIjoiTWFpbCIsIldUIjoyfQ%3D%3D%7C0%7C%7C%7C&sdata=%2BzlPfXf3KIA7MsPL2M4h3nx4j0xvlXoGadDePNQt0Lw%3D&reserved=0](https://urldefense.com/v3/__https:/www.ncbi.nlm.nih.gov/geo/query/acc.cgi?acc=GSE301433__;!!NLFGqXoFfo8MMQ!sX18jBzi0AXssJmzhgB7LiTycshulwZ6QrRiYhIpBjoIi2IW8OPgMxO0Lmkn6-skQttOgl_4kqtPUZCywMVdfZ11NKSQUdE$)
Enter token ydglcgqodzcpzqz into the box

and the custom code (GitHub repository):

[https://github.com/yerkes-gencore/Tomas_Venetoclax_Final](https://urldefense.com/v3/__https:/github.com/yerkes-gencore/Tomas_Venetoclax_Final__;!!NLFGqXoFfo8MMQ!sX18jBzi0AXssJmzhgB7LiTycshulwZ6QrRiYhIpBjoIi2IW8OPgMxO0Lmkn6-skQttOgl_4kqtPUZCywMVdfZ11vcTa9E8$)
