# Supplementary material for: BCL-2 Inhibition via Venetoclax at ART Initiation Induces Long-Term Reduction of the Intact SIV Reservoir
Source: Research Square preprint supplement (doi:10.21203/rs.3.rs-7060088/v1), 2025-07-14
Supplement: Supplementary file 3 [file 7fe4671d4915fa9968eda072.xlsx]

## Sheet: day 25 p.i.
gene_id	baseMean (mean of normalized counts for All samples)	log2FoldChange (log2 fold change (MLE): VA/A)	pvalue (Wald test p-value: VA/A)	padj (BH adjusted p-values: VA/A)
TRBV11.1	43.2922	-4.21983	6.71194e-23	9.97932e-19
MYH14	125.249	5.40041	1.9044e-14	1.41573e-10
CLU	151.448	4.80689	5.05042e-14	2.50299e-10
PPBP	1405.5	3.80656	4.93956e-12	1.83603e-08
KIR3DL12	107.881	4.81649	2.03779e-11	6.05957e-08
MCEMP1	99.1159	4.19357	5.66647e-10	1.40415e-06
CCL23	30.6543	8.05394	1.07382e-09	2.28079e-06
C15H9orf131	42.8504	1.57636	1.35522e-09	2.51867e-06
KIAA1549	140.136	-1.72559	2.98661e-09	3.88487e-06
TLR5	49.5703	3.78945	3.13548e-09	3.88487e-06
TRPM6	41.7288	5.12409	2.78359e-09	3.88487e-06
ABCG4	50.5553	5.42028	2.51551e-09	3.88487e-06
MARCO	237.084	8.46066	4.34737e-09	4.97206e-06
ADM	327.754	5.03775	6.84851e-09	7.27311e-06
BATF	376.772	1.01317	1.05017e-08	9.78748e-06
UPP1	493.134	1.65108	1.05327e-08	9.78748e-06
NDUFS8	1296.99	0.447261	1.14139e-08	9.98245e-06
KIR3DH	216.673	3.87236	1.21904e-08	1.00693e-05
JAG2	447.585	1.34649	1.73967e-08	1.36134e-05
ARHGEF16	35.9231	-2.23589	2.26027e-08	1.52753e-05
EMB	1377.54	3.10035	2.07582e-08	1.52753e-05
ALOX5	683.347	4.54024	2.21404e-08	1.52753e-05
ENSMMUG00000053539	53.174	-1.24761	2.75452e-08	1.78061e-05
ZFHX3	65.864	3.35428	3.04391e-08	1.8857e-05
TGIF1	1783.18	-0.605406	3.60404e-08	2.06096e-05
GCA	77.1904	2.81565	3.47154e-08	2.06096e-05
NRG1	200.901	3.31374	3.79822e-08	2.09155e-05
WLS	120.061	4.03918	4.1064e-08	2.1805e-05
ENSMMUG00000063960	30.5864	2.32456	4.38533e-08	2.24831e-05
ITM2C	232.357	-1.57399	4.85415e-08	2.40571e-05
SMAD7	2493.82	-0.899318	6.67433e-08	3.2011e-05
ENSMMUG00000056009	112.177	4.00515	8.10465e-08	3.65151e-05
MYO7A	63.6428	4.40999	7.90507e-08	3.65151e-05
CD9	1753.08	2.79291	1.01021e-07	4.17216e-05
CX3CR1	883.88	3.06339	9.82649e-08	4.17216e-05
C19H19orf38	403.269	3.26236	9.60384e-08	4.17216e-05
S100A12	25.3683	7.04823	1.06491e-07	4.27922e-05
SCAF8	1038.15	-0.528024	1.21525e-07	4.41619e-05
ENSMMUG00000062541	30.1997	3.84824	1.17178e-07	4.41619e-05
S100A9	10320.1	5.30975	1.21781e-07	4.41619e-05
TRPM4	32.6447	5.51645	1.16035e-07	4.41619e-05
PPIC	19.1695	7.36835	1.72658e-07	6.11208e-05
PTGES	55.3206	4.40255	1.7995e-07	6.2221e-05
ENSMMUG00000062392	62.9332	1.36361	2.01813e-07	6.68987e-05
LRRC25	1163.19	3.36028	2.02478e-07	6.68987e-05
PTAFR	1098.43	3.26691	2.24461e-07	7.11365e-05
ENG	22.8307	3.72073	2.24873e-07	7.11365e-05
ENSMMUG00000057298	19.5187	6.66771	2.40073e-07	7.43627e-05
NIBAN2	174.155	3.21521	2.58726e-07	7.85048e-05
ALDH3B1	252.711	2.88832	2.79047e-07	8.25242e-05
ENSMMUG00000062333	25.6869	4.50032	2.83073e-07	8.25242e-05
ZNF541	100.556	-1.46632	2.93194e-07	8.38309e-05
RAB3D	449.817	1.49464	3.05372e-07	8.56654e-05
ENSMMUG00000052473	38.4303	3.77005	3.11298e-07	8.57108e-05
FCGR1A	275.674	4.958	3.56751e-07	9.64394e-05
CCR2	464.389	3.11219	3.71359e-07	9.85958e-05
AQP3	223.047	2.53929	4.83062e-07	0.000126003
RNF144B	169.688	2.59543	5.34972e-07	0.000134962
CD300C	633.623	3.38761	5.35563e-07	0.000134962
ENSMMUG00000052841	231.872	3.33103	5.67517e-07	0.000138325
P2RY2	169.898	3.58149	5.6173e-07	0.000138325
FAM120A	558.07	0.653163	6.24496e-07	0.000147742
GLUL	2645.08	3.15056	6.45901e-07	0.000147742
TSKS	43.2175	3.16636	6.38169e-07	0.000147742
TFPI	117.174	3.17887	6.33337e-07	0.000147742
FBXO34	3330.53	-0.700827	6.85472e-07	0.000152113
CCM2L	20.6589	3.34424	6.77455e-07	0.000152113
SOD2	4235.07	2.23756	7.29197e-07	0.0001527
ADGRE2	740.196	2.86367	7.27244e-07	0.0001527
CSTA	170.125	3.02907	7.01621e-07	0.0001527
PYGL	533.099	3.30807	7.28468e-07	0.0001527
HLTF	209.53	-0.93106	7.78576e-07	0.000157241
HCK	2727.25	2.68459	7.81859e-07	0.000157241
PRRG4	317.872	3.26431	7.88421e-07	0.000157241
HTR7	71.5823	3.32693	7.93187e-07	0.000157241
AQP9	35.1161	5.12088	8.76126e-07	0.000171398
SLC50A1	1359.41	0.726575	9.86409e-07	0.000188025
F13A1	4169.58	4.28344	9.80415e-07	0.000188025
DYSF	1227.18	5.13368	1.05115e-06	0.000197585
VNN1	132.901	5.82761	1.06314e-06	0.000197585
DMXL2	460.598	3.11502	1.17295e-06	0.000215302
VWF	120.979	2.83511	1.22836e-06	0.000222723
ARL4D	79.7372	-1.35561	1.29444e-06	0.000226421
SNX10	329.551	2.42654	1.29413e-06	0.000226421
SELP	102.65	3.53299	1.27465e-06	0.000226421
SERPINA1	8936.57	2.59345	1.35741e-06	0.000228506
CYFIP1	947.175	2.7253	1.35532e-06	0.000228506
DRAM1	243.047	2.89093	1.34569e-06	0.000228506
ENSMMUG00000058324	18.1041	3.79982	1.36784e-06	0.000228506
TNIP2	4410.82	0.909446	1.48853e-06	0.000234513
ASAP2	30.4364	2.67867	1.43755e-06	0.000234513
FGR	2937.7	2.7751	1.46986e-06	0.000234513
TREML1	290.121	3.16426	1.49251e-06	0.000234513
RAB20	44.9582	3.25226	1.49844e-06	0.000234513
TNFAIP8L3	33.8624	3.31439	1.47491e-06	0.000234513
RIOK2	368.928	-0.683422	1.53823e-06	0.000238233
RASGRP4	204.946	2.51264	1.60256e-06	0.000245637
AATK	61.0813	3.4884	1.71251e-06	0.000259739
ADAMDEC1	504.335	6.80114	1.7295e-06	0.000259739
BRD2	7703.14	-0.495697	1.78717e-06	0.000260506
EMILIN2	2002.32	2.97691	1.78328e-06	0.000260506
ITGB5	122.589	3.40549	1.77823e-06	0.000260506
CNTLN	26.7262	2.77083	1.80969e-06	0.000260705
TNFRSF8	62.266	2.94517	1.8236e-06	0.000260705
ZBTB18	329.622	-0.722499	1.89999e-06	0.000269038
UBXN2B	124.158	0.968096	2.04178e-06	0.000282789
ENSMMUG00000054319	167.413	1.24053	2.09401e-06	0.000282789
TBXAS1	504.849	2.71104	2.07906e-06	0.000282789
SLC47A1	205.936	2.88842	2.07499e-06	0.000282789
ENSMMUG00000054160	27.8769	3.26981	2.04285e-06	0.000282789
MS4A4A	13.3186	6.1144	2.11121e-06	0.000282789
UPRT	276.883	-0.784094	2.16415e-06	0.000287291
SPTSSA	723.565	1.47846	2.23001e-06	0.000288311
PLBD1	8619.56	2.87708	2.19415e-06	0.000288311
TREM2	53.3422	3.72669	2.22117e-06	0.000288311
FAM20A	46.8482	3.69496	2.34571e-06	0.000300656
NR1D2	1212.86	-0.76802	2.44043e-06	0.000310122
STAB1	234.073	4.71071	2.50824e-06	0.000316039
LDLRAD3	873.131	2.76691	2.58468e-06	0.000320474
ENSMMUG00000057642	24.1873	3.87739	2.59904e-06	0.000320474
S100A8	12917.3	5.43176	2.60811e-06	0.000320474
ABCC4	216.022	1.40249	2.67968e-06	0.00032657
TM6SF1	580.844	2.20906	2.79891e-06	0.000335598
CREB5	135.024	3.00614	2.78155e-06	0.000335598
STEAP3	73.2697	2.95024	2.84503e-06	0.000335714
FPR3	89.0521	3.3399	2.82586e-06	0.000335714
OSER1	3555.2	-0.674443	2.89423e-06	0.000338831
METTL18	139.151	-1.00767	2.96591e-06	0.000344509
FPR1	68.0522	3.93713	3.01457e-06	0.000347447
CNOT8	1424.75	-0.4904	3.07417e-06	0.00035159
HK3	1877.97	3.75507	3.10552e-06	0.000352465
LHFPL2	102.588	3.06038	3.13585e-06	0.000353211
MEFV	350.978	2.44775	3.21836e-06	0.000359779
GCNT4	169.301	-1.6411	3.33932e-06	0.000370515
CDKN2AIP	864.408	-0.786872	3.48392e-06	0.000383696
MSRB1	1117.4	2.02777	3.64447e-06	0.000390387
RGS18	161.78	2.38276	3.76967e-06	0.000390387
HMOX1	718.589	2.48062	3.74726e-06	0.000390387
ARRDC4	269.409	2.68181	3.76121e-06	0.000390387
HHIPL1	87.4453	2.73675	3.66343e-06	0.000390387
DPYD	626.923	2.85856	3.73278e-06	0.000390387
STOM	128.746	3.08461	3.78099e-06	0.000390387
PLAU	129.767	3.21974	3.57319e-06	0.000390387
LCN2	29.058	5.11771	3.75528e-06	0.000390387
LGALS3	4008.76	2.15988	3.81064e-06	0.000390735
ENSMMUG00000059482	59.5128	1.45081	3.93191e-06	0.000397684
LILRA5	442.734	2.85104	3.92257e-06	0.000397684
ZMAT3	352.842	0.84156	4.13566e-06	0.000415467
ALOX5AP	533.88	1.99957	4.25628e-06	0.000424714
GRB10	31.2258	3.0731	4.39451e-06	0.000434512
ENSMMUG00000037684	1917.37	3.56138	4.41292e-06	0.000434512
NFYA	390.915	-0.615492	4.53594e-06	0.000443287
SIRPB2	491.27	2.93465	4.5689e-06	0.000443287
MGST1	41.631	3.52582	4.59148e-06	0.000443287
OBI1	72.7976	-1.26933	4.62945e-06	0.000444069
GUCY1B1	179.664	2.64949	4.69635e-06	0.000447598
ADAMTSL4	663.9	2.97253	4.77528e-06	0.000452222
SESN1	1161.15	-0.632277	4.94604e-06	0.000453386
RPRD2	1549.57	-0.452527	5.15491e-06	0.000453386
KIZ	471.282	-0.434802	4.87068e-06	0.000453386
SUPT20H	1103.55	-0.399201	5.15839e-06	0.000453386
SBNO2	658.778	0.997999	4.86103e-06	0.000453386
RAB31	2184.05	1.60057	5.07808e-06	0.000453386
ENSMMUG00000064769	57.8232	1.85773	5.08949e-06	0.000453386
NCF2	549.972	2.10982	5.06838e-06	0.000453386
SLC31A1	503.676	2.16399	4.96579e-06	0.000453386
FCGR2B	2668.88	2.80116	4.94792e-06	0.000453386
NECTIN2	275.461	2.90563	5.11506e-06	0.000453386
CD163L1	96.5157	2.91877	5.17044e-06	0.000453386
SPHK1	523.684	2.97667	5.184e-06	0.000453386
STING1	5174.57	1.04133	5.37579e-06	0.000464693
WIPI1	51.2303	2.5131	5.36732e-06	0.000464693
GPR141	194.897	2.4852	5.54319e-06	0.000470949
ENSMMUG00000031100	202.248	4.10042	5.49855e-06	0.000470949
GFRA1	3.61075	-5.31929	5.53069e-06	0.000470949
NRP1	225.807	3.14723	5.6493e-06	0.000477238
AMD1	2443.36	-0.636409	5.88596e-06	0.000494421
TMEM176B	85.8998	1.92452	5.95967e-06	0.000496094
VDR	95.6934	2.3132	5.98846e-06	0.000496094
SLC31A2	466.74	2.33344	6.00598e-06	0.000496094
PLAUR	869.118	2.98219	6.15322e-06	0.000505448
MAOA	100.197	2.93391	6.57481e-06	0.000535808
MSR1	126.387	3.2892	6.59489e-06	0.000535808
SUFU	1050.63	-0.689415	6.67596e-06	0.000539447
CXCR4	4856.63	-0.989898	6.77238e-06	0.00054428
SLC11A1	3418.23	2.29284	6.84877e-06	0.000547459
NHSL1	28.0191	2.18064	6.97832e-06	0.000551881
SLC46A1	66.6533	2.41936	6.94651e-06	0.000551881
RIN1	177.935	3.14965	7.12923e-06	0.000560832
CILK1	307.999	-0.665133	7.43757e-06	0.000574363
ZCWPW1	44.7695	2.27145	7.40631e-06	0.000574363
EGFL7	79.9877	2.70969	7.40722e-06	0.000574363
THBS1	3351.45	2.79166	7.45575e-06	0.000574363
OAF	91.725	1.74312	7.63725e-06	0.000584896
LST1	607.355	1.91599	7.67115e-06	0.000584896
TMEM37	23.5405	3.96641	7.88147e-06	0.000597866
OSM	1639.48	2.47689	7.95209e-06	0.000600161
ATP6V0D2	13.8388	3.86148	8.27442e-06	0.000621333
PTPN18	1208.14	0.932381	8.46161e-06	0.000632197
ENSMMUG00000052806	188.016	1.7584	8.88417e-06	0.000660449
PYHIN1	777.521	-1.18895	9.19899e-06	0.00068045
ARAP3	64.6188	2.20799	9.32222e-06	0.000683902
ENSMMUG00000053324	41.624	3.91713	9.33765e-06	0.000683902
SLC1A3	13.6669	5.4736	9.39715e-06	0.000684887
CDC42BPA	15.4677	3.89917	9.62399e-06	0.000697998
MED23	1000.17	-0.364706	9.74845e-06	0.000703592
ENSMMUG00000052428	80.0286	-1.1293	1.03955e-05	0.000746669
TANC1	793.238	-1.14892	1.04668e-05	0.000748172
TMEM71	703.372	-0.724316	1.0566e-05	0.000751654
SERPINB1	1193.08	1.83794	1.0677e-05	0.000755932
BVES	15.9793	4.55875	1.08742e-05	0.000766248
ENSMMUG00000060643	25.6486	2.32407	1.1071e-05	0.000776435
CD93	3329.41	3.43392	1.1173e-05	0.000779908
AKAP17A	7109.58	-0.496032	1.13274e-05	0.000786989
UBE2M	332.503	0.830369	1.14777e-05	0.000793721
ST6GAL1	3794.01	-0.785927	1.19944e-05	0.000810235
TLK1	2240.09	-0.760289	1.2017e-05	0.000810235
ATG10	114.089	0.813411	1.1852e-05	0.000810235
MVP	4729.59	1.04419	1.17988e-05	0.000810235
CTSD	8807.08	1.96703	1.20434e-05	0.000810235
MERTK	67.5332	3.58958	1.19435e-05	0.000810235
NOD2	406.442	2.09944	1.22989e-05	0.00082052
SLC7A7	1001.12	2.6961	1.23619e-05	0.00082052
HTRA1	325.543	5.89424	1.23514e-05	0.00082052
FPR2	45.4615	3.44912	1.24851e-05	0.000825014
MEX3C	537.058	-0.497276	1.28862e-05	0.00084402
NT5DC2	197.039	2.19054	1.28717e-05	0.00084402
CTSB	15091.5	2.2861	1.31303e-05	0.000856232
MCTP1	47.8656	2.29853	1.34004e-05	0.000866245
ADAM33	30.8975	5.17835	1.33844e-05	0.000866245
GGPS1	552.875	-0.633344	1.36568e-05	0.000879004
ZNF394	2443.56	-0.548221	1.38676e-05	0.000888724
NFATC3	2950.41	-0.67229	1.41648e-05	0.000903871
ANXA3	153.544	2.11458	1.44805e-05	0.000916156
ADGRE1	389.748	3.69145	1.44287e-05	0.000916156
MSI2	113.715	1.21378	1.47623e-05	0.000930027
TNFAIP6	8.809	6.24203	1.51179e-05	0.000948407
ENSMMUG00000054061	27.9033	1.69074	1.53823e-05	0.000953966
HK2	218.864	1.99339	1.5399e-05	0.000953966
BNC2	14.8825	4.91143	1.53202e-05	0.000953966
BICRAL	608.574	-0.595478	1.5715e-05	0.00095762
SBDS	782.832	-0.594767	1.5613e-05	0.00095762
TMEM170B	373.009	2.50524	1.57156e-05	0.00095762
ENSMMUG00000052050	10.7254	3.70642	1.5641e-05	0.00095762
CHAMP1	415.635	-0.528291	1.63541e-05	0.000992462
LTB4R.1	53.0979	2.38581	1.66644e-05	0.00100718
SCARB2	1647.76	1.83976	1.70878e-05	0.00102859
PSAP	51227.4	2.50274	1.72842e-05	0.00103357
HLX	114.609	2.85496	1.73095e-05	0.00103357
UGCG	1116.48	0.625168	1.74926e-05	0.00103662
SPINT1	352.484	2.36242	1.75e-05	0.00103662
PAPSS2	174.245	1.65183	1.77362e-05	0.0010382
ZNRF1	91.2033	1.71623	1.77242e-05	0.0010382
COL9A2	325.06	4.04331	1.76143e-05	0.0010382
CD163	8083.2	3.70583	1.78119e-05	0.00103854
ZDHHC14	253.685	1.66171	1.79024e-05	0.00103974
ENSMMUG00000054823	45.5068	2.3778	1.80317e-05	0.00104317
DAPK1	910.528	2.5006	1.83918e-05	0.00105988
ALCAM	388.53	0.689917	1.86414e-05	0.00107012
RNASE4	1873.54	1.99511	1.87789e-05	0.00107386
FMNL3	544.471	-1.14885	1.89449e-05	0.00107915
FCHSD2	818.836	-0.579422	1.90166e-05	0.00107915
CASP4	511.964	0.929909	1.91097e-05	0.00108031
ENSMMUG00000017061	89.6845	-0.903302	1.96394e-05	0.00110605
ASB1	412.484	-0.607226	1.99723e-05	0.00111634
TIMP1	3875.32	2.75348	2.00474e-05	0.00111634
QPCT	170.135	2.76517	2.00447e-05	0.00111634
PILRA	1334.75	2.8508	2.07511e-05	0.00115122
BAG5	474.489	-0.593146	2.11572e-05	0.00116938
DYRK2	5327.67	-0.84225	2.18147e-05	0.00120126
SMPDL3A	500.383	2.40194	2.1907e-05	0.00120189
S100A4	8715.7	1.69452	2.2117e-05	0.00120452
MMP1	41.9458	2.74599	2.2093e-05	0.00120452
PYCARD	1593.67	1.96793	2.22224e-05	0.00120585
ITGAM	2673.72	3.34281	2.2365e-05	0.00120918
CARD9	440.26	2.8486	2.25235e-05	0.00121333
ENSMMUG00000054922	319.023	1.38541	2.28555e-05	0.00121519
KCNK13	89.2098	1.59973	2.27615e-05	0.00121519
JDP2	206.864	2.61573	2.29622e-05	0.00121519
TNFRSF1A	521.219	2.61857	2.29667e-05	0.00121519
CD68	2268.05	2.65897	2.29033e-05	0.00121519
LILRB4	30.7743	4.0193	2.344e-05	0.00123583
TENT5C	9428.49	-0.597395	2.36275e-05	0.00124132
CD300A	187.7	2.49893	2.38505e-05	0.00124863
TNFSF12	2282.62	2.4196	2.40315e-05	0.00125065
CXCL1	69.4263	3.2469	2.40575e-05	0.00125065
IGSF6	1016.79	2.74399	2.45763e-05	0.00127317
CYP39A1	55.1643	3.18294	2.48141e-05	0.00128103
PSTPIP2	422.42	2.69514	2.49528e-05	0.00128373
SPI1	1878.29	2.35252	2.53039e-05	0.00129694
ENSMMUG00000053949	4.73414	-4.83183	2.5384e-05	0.00129694
DOCK4	166.889	2.9581	2.56355e-05	0.00130085
ENSMMUG00000050101	18.4588	3.80658	2.56013e-05	0.00130085
MMP19	23.3417	3.03379	2.6402e-05	0.00133519
CYBRD1	1259.96	2.54728	2.69473e-05	0.00135815
DIPK1A	303.111	-0.753836	2.7602e-05	0.00137849
ALDH1A1	614.266	2.79768	2.76291e-05	0.00137849
GSDME	28.5223	4.11605	2.75088e-05	0.00137849
CCDC151	41.3508	2.79449	2.87313e-05	0.00142869
ZNF473	330.875	-1.41791	2.9497e-05	0.00143465
G3BP2	7700.85	-0.571298	2.91534e-05	0.00143465
DAGLB	600.404	1.42981	2.94973e-05	0.00143465
ENSMMUG00000053674	50.4984	1.48623	2.92772e-05	0.00143465
SLC39A4	69.7346	1.76944	2.93367e-05	0.00143465
LILRA6	112.281	2.6668	2.95267e-05	0.00143465
GPRC5A	26.4308	3.88299	2.94884e-05	0.00143465
LDLR	1680.19	0.934524	2.9669e-05	0.00143687
ZNF831	339.436	-0.934512	2.98991e-05	0.00144331
ZFYVE28	39.4552	1.54531	3.06279e-05	0.0014692
ENSMMUG00000010883	15.4543	2.20995	3.06331e-05	0.0014692
CLDN5	120.303	2.1806	3.11974e-05	0.00149146
GRN	11049	2.1126	3.16696e-05	0.00150918
GNB4	150.544	2.33069	3.1853e-05	0.00151088
CDC42EP2	50.1638	2.73853	3.19086e-05	0.00151088
ANKH	1295.41	-0.817618	3.25138e-05	0.00153465
ENSMMUG00000011278	330.404	1.32167	3.28732e-05	0.0015467
FBXL14	967.223	-0.570451	3.34434e-05	0.00156857
GPR162	97.0434	1.80342	3.37176e-05	0.00157646
ENSMMUG00000061976	6.24812	5.74269	3.43747e-05	0.00158268
PTPRS	93.2304	-1.9891	3.43513e-05	0.00158268
PACS1	2732.69	-0.64268	3.43829e-05	0.00158268
IMPDH1	2161.46	0.671363	3.42464e-05	0.00158268
ENSMMUG00000051358	31.9141	2.59334	3.41247e-05	0.00158268
IFNGR2	1915.71	1.2839	3.46207e-05	0.00158382
FCN1	11512.3	3.76657	3.45443e-05	0.00158382
RETN	605.7	3.75275	3.5075e-05	0.00159968
ZC3H4	127.663	1.08434	3.52671e-05	0.00160352
AIF1	2025.33	3.42401	3.56017e-05	0.0016138
ENSMMUG00000053517	43.9068	3.18849	3.60683e-05	0.00162998
CD300LB	22.0555	3.70561	3.63255e-05	0.00163663
PLD1	15.024	4.45935	3.66646e-05	0.00164692
ITGA1	502.181	-1.36126	3.69157e-05	0.0016532
SLC43A3	706.225	2.1331	3.76586e-05	0.0016814
CD151	1286.52	1.16923	3.819e-05	0.00168906
VCL	787.102	1.36343	3.80301e-05	0.00168906
PGAP1	272.384	1.42611	3.81079e-05	0.00168906
ICA1	61.3592	1.74312	3.82844e-05	0.00168906
VPS18	589.966	-0.398924	3.86168e-05	0.00169019
MAPK11	179.607	1.35987	3.86512e-05	0.00169019
SIGLEC5	788.967	2.19383	3.8433e-05	0.00169019
ENSMMUG00000020050	6479.86	-0.734987	3.93727e-05	0.0017144
BAALC	16.4031	3.28598	3.94355e-05	0.0017144
ENTPD1	504.385	2.7131	3.96218e-05	0.00171748
HES1	475.185	2.17511	3.97516e-05	0.0017181
ZYX	4403.75	1.58472	4.03559e-05	0.0017361
ENSMMUG00000050345	16.2709	3.80108	4.04017e-05	0.0017361
BRPF3	297.86	-0.665127	4.10159e-05	0.00175742
LRMDA	20.8102	3.92714	4.14029e-05	0.0017689
YPEL5	13178.6	-0.549832	4.25071e-05	0.00181088
USP13	64.8765	-0.860916	4.29488e-05	0.00182446
MYNN	661.956	-0.567729	4.32096e-05	0.00183032
PZP	124.644	2.9045	4.34742e-05	0.00183629
SLC37A2	517.112	2.31791	4.37995e-05	0.00184479
TNFAIP3	33520.8	-0.723895	4.45045e-05	0.00186919
FAM89A	369.63	1.3065	4.57148e-05	0.00190924
GATA2	15.4155	2.5552	4.56172e-05	0.00190924
SLC22A4	53.8519	2.58275	4.62243e-05	0.00192511
FCGR3	2990.94	3.3128	4.70172e-05	0.00195266
FAM214B	326.686	1.02579	4.72452e-05	0.00195666
GLCE	207.131	-0.931747	4.74342e-05	0.00195903
ZC3HAV1	4065.65	-0.679684	4.79191e-05	0.00197162
ENSMMUG00000063272	28.5557	3.28865	4.80042e-05	0.00197162
DHRS7	1255.93	1.70215	4.83812e-05	0.00197619
FES	1459.97	2.33368	4.83368e-05	0.00197619
FGL2	2401.28	2.00189	4.88959e-05	0.00199174
IL1RAP	547.863	1.70784	5.05289e-05	0.00205263
JUND	21742.2	-0.722615	5.10149e-05	0.00206111
PAQR7	46.3278	1.88381	5.08924e-05	0.00206111
BAIAP2	522.855	2.19046	5.17886e-05	0.0020867
ENSMMUG00000059811	23.6585	3.20468	5.2123e-05	0.0020935
CCL2	100.51	4.75304	5.22389e-05	0.0020935
ZBTB1	1702.43	-0.569129	5.29999e-05	0.00210134
PCBD1	32.8948	2.13893	5.28311e-05	0.00210134
KCNMB1	191.521	2.19018	5.26887e-05	0.00210134
IRAK3	383.999	2.20931	5.28953e-05	0.00210134
MTCH2	768.951	1.38005	5.32348e-05	0.00210504
PCSK6	26.4936	3.41331	5.34495e-05	0.00210792
TSC22D3	49211.5	-0.99051	5.36333e-05	0.00210958
ENSMMUG00000018474	760.134	2.57015	5.46374e-05	0.0021434
HFE	103.291	2.37989	5.47869e-05	0.00214361
IGFBP4	940.997	1.85149	5.55596e-05	0.00216382
MS4A7	395.645	2.32074	5.55946e-05	0.00216382
ID3	1029.19	-0.998603	5.65377e-05	0.00219478
CTBP2	271.707	2.44321	5.77773e-05	0.00223706
INTS6	776.669	-0.53132	5.82795e-05	0.00225065
SCIN	27.717	4.17302	5.96627e-05	0.0022981
MMUT	197.741	-0.686067	6.00428e-05	0.00230676
TRIM47	277.95	2.20316	6.02844e-05	0.00231007
DENND3	576.423	2.05163	6.06969e-05	0.0023199
CCL20	38.9331	2.06874	6.10993e-05	0.00232929
RGL3	10.454	4.54508	6.14977e-05	0.00233848
SPAG1	51.5977	1.65557	6.24592e-05	0.002351
CTSC	1747.15	2.1849	6.22368e-05	0.002351
ENSMMUG00000019939	557.708	2.66583	6.22505e-05	0.002351
ENSMMUG00000016897	203.629	2.7977	6.24508e-05	0.002351
CTSL	2665.89	1.38166	6.28465e-05	0.0023596
CHIC2	765.196	-0.560008	6.41243e-05	0.00237931
BCL3	1273.39	1.26862	6.42078e-05	0.00237931
LY96	145.976	1.70576	6.39291e-05	0.00237931
ENSMMUG00000022334	167.915	2.2777	6.43317e-05	0.00237931
ENSMMUG00000004924	9.57303	3.02464	6.36911e-05	0.00237931
LRP1	2093.73	3.12754	6.37482e-05	0.00237931
ENO1	18648.2	0.611332	6.47543e-05	0.00238309
CAVIN3	208.446	2.69639	6.47452e-05	0.00238309
SMAD3	1042.5	-0.557398	6.63445e-05	0.00243037
MTSS2	123.1	1.75781	6.65294e-05	0.00243037
TMEM150B	64.3466	2.90048	6.64044e-05	0.00243037
ENSMMUG00000014692	1112.66	-0.685316	6.68286e-05	0.00243531
UBTD1	247.572	2.11221	6.71849e-05	0.00244231
ARRDC2	2475.61	-0.387208	6.91774e-05	0.00250861
IKZF5	1343.89	-0.417953	6.95485e-05	0.00251593
S100P	34.1248	3.30156	7.0934e-05	0.00255982
AP2A1	706.942	1.00085	7.14136e-05	0.00257089
HACD4	504.414	1.42748	7.18349e-05	0.00257981
QRICH2	81.5522	1.50626	7.26001e-05	0.00260101
STMP1	266.268	0.925491	7.37908e-05	0.00262469
RIPOR3	30.6318	1.35608	7.37245e-05	0.00262469
CD300LF	260.161	2.74927	7.35529e-05	0.00262469
ELF1	5597.38	-0.754681	7.44049e-05	0.00263199
MINDY1	280.927	1.0757	7.45269e-05	0.00263199
LILRA1	739.594	3.21873	7.42149e-05	0.00263199
AGTRAP	780.637	1.8513	7.53927e-05	0.00265547
CXCL16	724.793	2.41209	7.55492e-05	0.00265547
CYP3A5	156.572	3.78638	7.60893e-05	0.00266815
ENSMMUG00000063299	439.554	2.49798	7.76372e-05	0.0027033
CD300H	52.3725	2.53647	7.76076e-05	0.0027033
ENSMMUG00000042839	13.0459	3.84877	7.72763e-05	0.0027033
ENSMMUG00000005355	54.783	2.52451	7.90627e-05	0.00274651
STX11	2165	1.43404	7.9841e-05	0.00275624
ITGAV	331.285	1.70884	7.98991e-05	0.00275624
SETD9	53.7619	1.7316	7.97003e-05	0.00275624
ENSMMUG00000029343	88.0812	-0.676862	8.05136e-05	0.00276627
SMG8	329.905	-0.65423	8.06862e-05	0.00276627
CRISPLD2	246.492	2.36715	8.07481e-05	0.00276627
ENSMMUG00000006472	266.136	-0.666124	8.26762e-05	0.00282581
SRBD1	145.873	-0.886298	8.46377e-05	0.00287883
PSKH1	1545.45	-0.491552	8.48081e-05	0.00287883
STXBP5	839.981	-0.40916	8.44281e-05	0.00287883
SMARCA5	4510.68	-0.363888	8.61679e-05	0.00289197
PLP2	1295.09	0.816306	8.56606e-05	0.00289197
RRBP1	841.281	1.30101	8.60392e-05	0.00289197
SLC35E4	368.586	2.28079	8.59417e-05	0.00289197
PLOD1	447.259	2.56987	8.56346e-05	0.00289197
MTHFD2	572.663	1.09976	8.63685e-05	0.00289218
ANPEP	20.0012	4.58761	8.67503e-05	0.00289844
P2RX1	38.0663	1.60743	8.83778e-05	0.00294619
FOSL1	184.359	2.15846	8.90024e-05	0.00296038
CLEC7A	322.931	2.69503	8.92509e-05	0.00296201
LGMN	2794.06	2.2671	8.95546e-05	0.00296547
NOL3	7.91876	4.59395	8.97955e-05	0.00296684
IFI30	6354.01	2.1697	9.02383e-05	0.00297486
MRTFA	870.313	-0.421963	9.10586e-05	0.00299526
TUBE1	172.592	-0.558315	9.19187e-05	0.00301688
ZBTB9	44.0377	-0.899222	9.3311e-05	0.00304243
IKBIP	75.8793	1.54822	9.31698e-05	0.00304243
DUSP6	4610.9	2.30138	9.32205e-05	0.00304243
NAIP	193.05	2.6765	9.37365e-05	0.00304962
DAB2	24.6131	3.76292	9.48826e-05	0.00308016
ABCG1	706.256	-1.40157	9.58347e-05	0.00310429
TPP2	1143.26	-0.389787	9.67439e-05	0.00312015
TLR2	593.412	2.50446	9.65939e-05	0.00312015
EPHX3	22.0253	3.64998	9.77486e-05	0.00314573
BIRC2	1776.19	-0.541652	9.82752e-05	0.00315485
SMIM1	224.543	2.11147	9.84563e-05	0.00315485
MPIG6B	261.017	2.63978	9.86886e-05	0.00315549
METRNL	372.136	2.26549	9.97057e-05	0.00318117
LAMC1	66.4073	3.17282	0.000100666	0.00320492
NPTX2	47.6069	3.72079	0.00010205	0.00324204
CREG1	3022.52	1.96841	0.000104169	0.00329617
ENSMMUG00000008111	378.501	2.43494	0.000104197	0.00329617
TSHZ2	78.5083	1.3432	0.000104737	0.00330623
BLVRB	345.561	1.53532	0.000105397	0.00331298
VSIG4	117.954	4.30925	0.000105365	0.00331298
CAVIN2	209.529	2.43711	0.00010719	0.00336224
SLC22A15	44.8519	2.72797	0.000107454	0.00336342
LRIG1	3356.01	-0.573986	0.000108422	0.00337398
TMSB10	20745.3	0.507229	0.0001081	0.00337398
SEPTIN5	81.7987	2.0743	0.000108795	0.00337398
MPZL2	100.295	2.16147	0.000108823	0.00337398
G0S2	3280.74	3.49575	0.000108926	0.00337398
CASP1	1725.06	1.35496	0.000109576	0.00338706
GUCY1A1	50.9122	1.82251	0.00010981	0.00338725
SPATA6	130.946	2.10339	0.000110902	0.00341385
IDH1	405.316	2.06817	0.000111788	0.00342693
RHOU	210.739	2.30172	0.000111626	0.00342693
ENSMMUG00000049698	27.3356	3.16718	0.000112124	0.00343017
RRAGC	290.712	0.896178	0.000113728	0.0034721
BCLAF1	8107.48	-0.368646	0.000115206	0.00351
PLXNB2	2716.4	1.91243	0.00011651	0.00354247
TXNIP	23378.1	-0.953454	0.000118924	0.00355766
SPTLC2	472.328	0.889996	0.000117955	0.00355766
NOTCH2	1523.99	1.30474	0.000118206	0.00355766
PRKAR2B	101.667	1.44435	0.000118532	0.00355766
LIPA	1419.93	1.59364	0.000118767	0.00355766
RHBDF2	634.086	1.63542	0.000118062	0.00355766
CHST15	456.001	1.91734	0.000118112	0.00355766
TMEM150C	18.1431	3.95156	0.000117817	0.00355766
CSF3R	3026.3	3.12798	0.000119174	0.003558
ASAH1	1549.32	2.08533	0.000119925	0.00357324
TSPYL2	1562.96	-0.774915	0.000120179	0.00357365
CD226	169.941	-0.764462	0.00012054	0.00357723
IL18	49.9717	1.55988	0.000120781	0.00357723
FKBP1B	39.1321	2.94218	0.00012259	0.0036236
SERPINE1	403.936	2.47778	0.000123606	0.00364639
SLC25A36	780.126	-0.516441	0.00012527	0.0036736
NQO2	297.927	1.82851	0.000125009	0.0036736
LIF	46.2289	2.30735	0.000125165	0.0036736
RASSF4	483.393	1.6658	0.00012566	0.00367778
ENSMMUG00000030144	1360.53	3.91829	0.000127506	0.00372448
CSTF2T	593.158	-0.585977	0.000128462	0.00373042
PGAP6	1611.96	1.58834	0.000128273	0.00373042
NXN	62.846	1.70696	0.000128408	0.00373042
ENSMMUG00000058532	4569.98	1.77952	0.000128914	0.00373624
ZNF250	190.012	-0.865571	0.000130003	0.00373866
PDK2	400.165	-0.578716	0.000129635	0.00373866
PRCP	1271.53	1.59599	0.000129823	0.00373866
CD14	3968.42	3.03331	0.000129543	0.00373866
RNASE6	3491.8	1.98232	0.00013068	0.00375086
HDGFL3	12.4022	2.51679	0.000132396	0.00379279
ENSMMUG00000064098	34.8564	-1.00529	0.000133972	0.00383057
RHAG	15.0808	3.96819	0.000134856	0.00384845
JAG1	161.514	2.20144	0.000135602	0.00386233
HAL	21.0163	4.24207	0.000136212	0.00386488
GPR27	5.30597	4.76754	0.00013604	0.00386488
ENSMMUG00000054831	43.8653	3.23969	0.000139184	0.0039417
B4GALNT1	32.5175	1.70328	0.000139662	0.0039477
REPIN1	808.334	-0.407006	0.000140507	0.00395494
NCF4	1424.78	1.22922	0.000140716	0.00395494
ZNF503	21.6135	3.37558	0.000140218	0.00395494
LTBR	812.885	3.10575	0.000141088	0.00395791
TIFAB	45.1308	2.45386	0.000141727	0.00396835
IRF1	13513.6	-0.706523	0.000142411	0.00398
ENSMMUG00000009406	41.2653	1.64518	0.000143428	0.00400091
MXI1	1805.71	-0.680493	0.000143829	0.0040046
TEK	78.8533	4.01082	0.000144729	0.00402211
CTSS	6031.39	1.897	0.00014581	0.00404459
FCHO1	1007.29	-0.64057	0.000146681	0.00406119
NFIL3	2274.31	1.01452	0.000146961	0.00406137
IL1R1	141.603	1.55941	0.000148058	0.00408409
DGKD	1174.94	-0.559416	0.000151639	0.00416742
DOCK5	346.732	2.23469	0.000151454	0.00416742
NAP1L2	17.2721	-1.14708	0.000152148	0.0041737
TSPO	3729.21	1.41984	0.000152937	0.0041876
AZU1	251.275	3.44457	0.000153839	0.00419636
COCH	46.9291	3.54925	0.000154104	0.00419636
ENSMMUG00000029465	4.32085	5.21017	0.00015373	0.00419636
TRIB1	2114.52	1.57089	0.00015558	0.00422593
GATM	81.641	2.12869	0.000155758	0.00422593
FLOT1	1595.26	0.61338	0.000156892	0.00424895
MYLIP	3151.93	-0.598205	0.000157351	0.00425363
MAFG	848.922	0.584838	0.000157836	0.00425899
KLHL7	165.956	-0.512696	0.000159723	0.00430211
MYO1F	4385.71	1.38515	0.0001624	0.00436631
LPP	412.685	0.745562	0.000163314	0.00438295
ENSMMUG00000012479	526.308	-0.525851	0.000164046	0.00439467
RGS12	42.4754	-0.929924	0.000172478	0.00457928
CYTH1	3498.81	-0.418169	0.000171484	0.00457928
NACC2	195.642	2.29305	0.000172324	0.00457928
FN1	14712.4	3.02025	0.000172329	0.00457928
HGF	53.3339	3.15679	0.00017194	0.00457928
NAA30	687.496	-0.6311	0.00017415	0.00461543
TOB2	2598.79	-0.573768	0.000176187	0.00466113
KIF13A	85.3813	1.6427	0.000177464	0.00468657
MADD	3333.32	-0.557473	0.000178304	0.00470041
CCDC36	15.5349	2.76784	0.000178796	0.00470503
AOAH	929.746	2.48865	0.000179293	0.00470977
ITPRIP	3092.34	-0.542776	0.000179927	0.00471808
FBXL4	359.94	-0.883645	0.000180767	0.00472345
SLC35E3	173.929	1.23499	0.000180588	0.00472345
TMEM158	138.613	2.66554	0.000181643	0.00473801
MARCHF3	319.922	-0.962797	0.000183205	0.00474459
CEP76	137.243	-0.906244	0.000183056	0.00474459
ENSMMUG00000006971	603.028	0.460085	0.000184448	0.00474459
PCYT1A	282.797	1.15253	0.000183048	0.00474459
CLEC12A	56.288	2.22271	0.000183891	0.00474459
MYOF	171.764	2.64424	0.000184125	0.00474459
NFAM1	918.377	2.90427	0.000184384	0.00474459
GFI1B	13.2135	3.29279	0.000182358	0.00474459
ENSMMUG00000065114	12.0979	3.69999	0.000186618	0.00479211
SIAH2	1492.08	-0.594995	0.00018742	0.00480442
VCAN	7794.72	3.15398	0.000189023	0.00483718
B4GALT5	87.4886	1.79457	0.000189728	0.00484686
CAMKK2	546.38	0.815916	0.00019156	0.0048693
MOCOS	106.312	1.76968	0.000191589	0.0048693
FUCA1	1282.48	1.79291	0.000191097	0.0048693
NAPRT	277.577	2.25976	0.000192156	0.00487539
CCL3	6058.63	2.97682	0.000195209	0.0049444
CXCL3	2644.3	3.26976	0.000195887	0.00495313
GPRC5A.1	14.1753	4.44597	0.000197045	0.00497395
ADPRH	120.62	1.41064	0.00019848	0.00500169
FAM53C	3091.68	-0.351749	0.000199559	0.00502039
SH2B2	234.799	1.56837	0.00020007	0.00502183
SIGLEC9	528.682	2.22791	0.000200968	0.00502183
SPRED1	35.6362	2.33939	0.00020033	0.00502183
ENSMMUG00000039864	24.0531	3.1412	0.000200711	0.00502183
ENSMMUG00000019432	433.785	-0.687404	0.00020185	0.00502697
CYBB	3496.99	3.0109	0.000201622	0.00502697
MAP3K20	187.245	1.66327	0.000202489	0.00503436
ENSMMUG00000051073	14.5171	3.03732	0.000202824	0.00503436
SLAIN2	1307.33	-0.263456	0.000203187	0.00503498
ENSMMUG00000050405	24.0298	1.5037	0.000204138	0.00505012
RIOX1	755.365	-0.653347	0.0002068	0.00510749
GNPDA2	85.8146	-0.680579	0.000209175	0.00515757
TRMT12	124.75	-0.797276	0.000211294	0.00518312
PTPRE	873.912	1.48765	0.000210958	0.00518312
LYN	3278.93	1.85892	0.000211571	0.00518312
NRGN	215.85	2.45922	0.000212142	0.00518312
PTGER2	1100.47	2.95474	0.000211953	0.00518312
CCDC153	9.33748	4.92435	0.000212303	0.00518312
NIP7	497.917	-0.484159	0.00021323	0.00519722
GFRA3	96.8023	2.99389	0.000213916	0.0052054
SOAT1	789.711	1.46952	0.000217018	0.00523803
CD180	203.088	2.02379	0.000215796	0.00523803
IGF2BP3	32.473	2.34093	0.000216122	0.00523803
OSCAR	65.7094	2.61309	0.000217008	0.00523803
THBD	7427.2	3.23982	0.000216319	0.00523803
S100A2	189.19	2.35123	0.000217762	0.00524747
TUBA4A	9527.58	-0.826657	0.00021825	0.00525072
LRP5	654.055	-1.14261	0.000220109	0.00528687
ETS1	10857.4	-0.91224	0.000222462	0.00533478
IL10	153.408	2.10426	0.000223137	0.00534236
KCNQ1	1007.07	1.98897	0.000224397	0.00536389
AXL	79.753	-1.39783	0.000227136	0.00539727
TBC1D2B	632.866	-0.481434	0.000226833	0.00539727
SLC18B1	300.834	1.69725	0.000226587	0.00539727
DZIP1L	7.64304	3.49064	0.000227246	0.00539727
ETV6	1210.08	0.582742	0.000228742	0.00541551
GFOD1	69.7585	2.45001	0.000228382	0.00541551
ACSL1	1266.98	1.6109	0.000229234	0.00541853
GFI1	86.6167	-1.02063	0.000230201	0.00542598
ETHE1	960.709	0.636931	0.000230638	0.00542598
G6PD	1649.74	1.27339	0.000231277	0.00542598
WARS1.1	1820.91	1.63713	0.000230795	0.00542598
MARCKS	228.379	2.32958	0.000231374	0.00542598
SLC39A1	1318.38	1.38441	0.000232652	0.00544734
RRP12	1781.11	0.781668	0.000233971	0.00546104
DAGLA	38.8255	2.90593	0.000233858	0.00546104
SDC3	369.162	2.98516	0.000234378	0.00546196
SSH3	221.048	1.80025	0.000234938	0.00546644
GPNMB	362.984	3.22747	0.00023573	0.0054763
TSPYL1	6314.18	-0.683911	0.000236521	0.00548611
HIST1H2BJ	19.9205	1.57185	0.000238225	0.00549989
ENSMMUG00000007366	29.1526	1.67487	0.000238067	0.00549989
ENSMMUG00000051870	6.63351	3.78051	0.000237979	0.00549989
ATP6V1A	656.919	1.4477	0.000239868	0.00552923
PLA2G15	784.788	1.4848	0.000240464	0.0055344
MARCHF5	397.064	-0.367761	0.000241419	0.00554779
SRC	73.9613	2.15835	0.000242263	0.00555403
GAS2L1	305.003	2.22216	0.000242438	0.00555403
TBC1D12	61.4028	1.74773	0.000243542	0.00557075
TNFRSF11A	62.2007	2.05761	0.000244518	0.00558447
CPPED1	731.961	1.59418	0.000245495	0.00559818
ENSMMUG00000013289	3066.97	2.85471	0.000247895	0.00563562
C5AR1	3920.4	3.11503	0.000247842	0.00563562
DGAT2	166.309	2.28818	0.000249925	0.00566447
ACOD1	81.9664	3.0131	0.000249715	0.00566447
ZNF22	808.006	-0.49525	0.000250884	0.00567753
ELP5	400.312	-0.410516	0.000251518	0.00568324
ENSMMUG00000051337	137.67	1.0639	0.000252333	0.00569299
TMEM185B	563.84	-0.464014	0.000256023	0.00575944
RENBP	132.152	2.00007	0.000256349	0.00575944
CYRIA	732.795	2.01406	0.00025644	0.00575944
ENSMMUG00000057035	26.9473	1.63368	0.00025743	0.00577296
PHLDA1	260.755	1.58236	0.000258556	0.00578948
LPL	611.602	1.6701	0.00026002	0.0058135
TRAV3	26.4497	-1.46268	0.000263213	0.00586444
MRPL49	3481.25	-0.512599	0.000262696	0.00586444
GATAD1	357.093	-0.473223	0.000263482	0.00586444
C3AR1	1161.49	3.33663	0.000264163	0.00587081
PITHD1	938.272	-0.39529	0.000266978	0.00592453
DHRS3	732.813	-0.905673	0.00026865	0.00593127
PDCD4	1892.8	-0.829828	0.000268351	0.00593127
PTPN1	1847.38	0.612687	0.000270473	0.00593127
CLIC1	2664.72	1.33586	0.000269448	0.00593127
SDCBP	1285.98	1.5048	0.000269479	0.00593127
ENSMMUG00000054566	14.5068	2.23995	0.000270206	0.00593127
MMP9	64.2486	3.14853	0.000268152	0.00593127
IL1RN	1054.04	3.45725	0.000270087	0.00593127
PDCD1LG2	20.9825	2.13412	0.000271194	0.00593831
ZNF462	19.3034	1.6297	0.000272794	0.00596457
CCL8	12.6814	4.11512	0.000273434	0.00596979
ITGA2B	585.729	3.16186	0.000274997	0.0059951
FYCO1	456.899	-0.646073	0.000275965	0.0060074
C6H5orf34	114.544	-0.80796	0.000278711	0.00604945
SCML4	2624.68	-0.804747	0.00027839	0.00604945
SPRY1	55.7698	1.33443	0.000280195	0.00605014
RTN4RL2	56.3054	2.56656	0.000279864	0.00605014
MAFB	3701.36	2.91591	0.000279947	0.00605014
LYZ	27117	3.04744	0.00028037	0.00605014
SS18L1	130.397	0.669925	0.000282698	0.00609152
KANSL2	2945.27	-0.513982	0.000285795	0.0061316
PLSCR1	153.94	1.60088	0.00028548	0.0061316
MGST2	167.688	1.75929	0.000285788	0.0061316
ANKAR	67.0033	-0.612934	0.000291093	0.00623627
TYROBP	2127.13	2.0713	0.000293486	0.00627848
SACM1L	502.491	-0.565904	0.000294354	0.00627898
P2RY13	63.8505	2.73752	0.000294167	0.00627898
SERINC5	1979.8	0.689994	0.000294997	0.00628368
JOSD2	291.532	1.27399	0.000296919	0.00630657
FRMD4A	60.8257	1.67558	0.000296914	0.00630657
PGD	2094.69	1.1116	0.000298671	0.00633472
PRKCI	406.558	0.49991	0.000299905	0.00635184
DPCD	250.362	0.744674	0.000300583	0.00635713
FCER1G	4439.21	2.855	0.00030245	0.00638755
TCIRG1	5600.49	1.41519	0.000303923	0.00639919
ABCC3	129.49	2.335	0.000304293	0.00639919
CPM	903.207	3.62402	0.000303746	0.00639919
TMEM204	232.875	-0.934625	0.000307614	0.00645078
Metazoa_SRP.3192	18.3704	1.35835	0.000307453	0.00645078
TNFRSF1B	5802.56	1.36467	0.000309207	0.00647506
CIBAR1	16.7102	1.97939	0.000310146	0.00648558
HBEGF	904.637	2.82748	0.000310652	0.00648703
BRSK2	16.6621	1.69873	0.000312332	0.00650821
SLC46A2	96.4885	2.34634	0.000312541	0.00650821
ENSMMUG00000049482	6.2595	3.69265	0.000314469	0.00653919
ENSMMUG00000051990	7.12648	3.08767	0.000315826	0.00655824
CSF2RB	1640.32	2.04418	0.000320062	0.00661848
UNC13B	93.5624	2.33454	0.000319539	0.00661848
P2RY12	9.27963	3.06129	0.000319842	0.00661848
LNX2	345.183	-0.560318	0.000321321	0.00662608
TNFSF13B	347.253	1.75249	0.000320948	0.00662608
ANXA5	2967.9	1.33897	0.000327444	0.00674299
ITSN1	181.797	1.49347	0.000331564	0.00681839
NPC2	983.382	2.00624	0.000334005	0.00685911
PLXDC2	33.0389	2.58241	0.000335218	0.0068703
ECM1	150.607	3.50983	0.000335475	0.0068703
RFLNB	1806.63	-0.806231	0.000336664	0.00688277
ENSMMUG00000014699	8.62598	3.70959	0.000337009	0.00688277
GALK1	572.669	0.8325	0.000338495	0.00688962
MARVELD1	263.175	1.51707	0.000338445	0.00688962
LILRAB	672.49	3.22791	0.000338735	0.00688962
GK5	98.6654	2.24671	0.000341287	0.00693204
NPTN	1239.37	0.953916	0.000342075	0.0069357
RTN1	175.264	2.63563	0.0003424	0.0069357
CAPG	13422.2	0.612866	0.000343094	0.00694031
SPAG9	335.788	0.610519	0.000343772	0.00694457
TLR8	27.9089	2.76873	0.000349474	0.00705018
ENSMMUG00000055607	21.2216	3.52505	0.000351451	0.00708045
ZHX1	547.716	-0.42568	0.000351968	0.00708128
DRG2	1269.49	-0.459191	0.000353573	0.00710394
TLR4	891.16	2.9458	0.000357361	0.00717037
HSD17B4	2070.74	-0.455115	0.000360572	0.00721362
SKAP2	864.977	1.68824	0.000360681	0.00721362
TUBB1	405.289	3.24927	0.00036129	0.00721362
ENSMMUG00000061712	62.3728	4.25908	0.000361457	0.00721362
C1H1orf162	498.123	2.99656	0.000362166	0.00721808
NXPE3	10185.6	0.869319	0.000363674	0.00722876
FNDC3B	487.712	1.46121	0.000363643	0.00722876
CD36	606.029	3.96556	0.000365666	0.00725864
SLC25A37	538.978	1.25184	0.000366435	0.00726422
ENSMMUG00000052900	32.0904	1.98021	0.000368161	0.00727902
RASL10A	18.2398	2.2583	0.000367727	0.00727902
NLRC4	7.5111	3.1129	0.000368781	0.00728158
Metazoa_SRP.2597	7.07371	3.05393	0.000370049	0.00729694
XPC	1718.4	-0.500457	0.000370803	0.00730211
NCCRP1	5.6134	4.85708	0.000372345	0.00732278
DNM1	318.67	2.97398	0.000374313	0.00735177
NUDT1	279.125	0.588157	0.000378403	0.00742229
FAM127C	380.545	0.669995	0.000379603	0.00742623
PXN	2222.61	1.2799	0.000379502	0.00742623
C7H14orf28	151.744	-0.751602	0.000383541	0.00749342
PDE7A	624.504	-0.789536	0.000386443	0.00753547
ENSMMUG00000060562	15.8293	1.7744	0.000386707	0.00753547
HERC4	331.162	-0.472836	0.000388831	0.00756694
RNF130	1852.53	1.58705	0.000389454	0.00756916
GSKIP	437.416	-0.42139	0.000394742	0.00766191
SOCS2	402.01	1.53032	0.000395685	0.00766825
ABCG2	420.958	-0.787513	0.0003961	0.00766825
SLC43A2	808.72	1.57029	0.000398116	0.00769725
ENSMMUG00000060899	34.825	-0.938943	0.000399109	0.00770644
EXOC6	300.915	-0.606378	0.000404119	0.00779304
ENSMMUG00000062941	1359.66	-0.7286	0.000405132	0.00780246
MED17	415.648	-0.384548	0.000405939	0.0078079
TIGD2	71.3083	-0.804786	0.000410889	0.0078827
ITGA2	74.7239	2.29875	0.000410372	0.0078827
ABI3	445.33	1.24124	0.000411703	0.00788597
SCIMP	328.926	2.10133	0.00041212	0.00788597
PPP1R14A	8.45843	-2.28626	0.000414677	0.00792469
SLFN13	1138.98	-1.11067	0.000419018	0.00799433
ENSMMUG00000039212	71.7099	2.07194	0.000419396	0.00799433
CEBPD	540.513	1.99669	0.000420281	0.00800095
ENSMMUG00000017270	219.167	-0.607516	0.000422663	0.008036
PF4V1	59.7488	2.87663	0.000428838	0.00814299
ZNF263	1583.43	-0.491957	0.000430231	0.00815903
ADSL	2226.78	-0.698988	0.000431852	0.00816892
SASH1	61.3359	2.11336	0.00043139	0.00816892
DNAJC25	665.714	1.23317	0.000432917	0.00817867
CFP	2478.54	1.73632	0.000437287	0.00822921
RAB13	23.9722	2.89822	0.000436554	0.00822921
CCR1	473.99	3.65773	0.000437713	0.00822921
SLCO2B1	51.8672	5.62024	0.000437806	0.00822921
NARS2	308.821	-0.526141	0.000439968	0.00824898
LPCAT2	101.629	2.09315	0.000439489	0.00824898
KLF2	4734.48	-0.731235	0.000441111	0.00825999
ENSMMUG00000006385	645.34	2.96184	0.000442092	0.00826795
GEM	184.021	1.56402	0.000445136	0.00831443
CTSA	6147.53	1.3093	0.000446061	0.00831846
PLXNC1	1618.44	1.4636	0.000446471	0.00831846
CKAP4	546.875	1.3546	0.000450083	0.00837526
TNFRSF21	1316.32	2.70576	0.000450713	0.0083765
TSTA3	1122.38	0.317417	0.000451479	0.00838025
RAB6B	55.7747	2.0607	0.000453258	0.00840279
PIK3IP1	3679.51	-0.768125	0.000453899	0.00840419
TPCN2	801.77	1.372	0.000454783	0.00841008
ZMYND11	1794.72	-0.531611	0.000459256	0.00846124
VSIR	14079.5	1.27525	0.000458978	0.00846124
PF4	623.278	3.14584	0.000459156	0.00846124
ENSMMUG00000012690	1350.42	-0.51613	0.000463982	0.00853774
FLVCR2	549.725	2.81135	0.000469622	0.00863083
ENSMMUG00000054987	18.4645	1.62145	0.000471515	0.00865492
RNF103	1741.92	-0.447952	0.00047489	0.00870612
SSBP2	984.025	-0.659664	0.000478538	0.00876219
SP3	2342.97	-0.369674	0.00048387	0.00884892
APOBEC3A	1035.44	3.47722	0.000484998	0.00885866
NRIP1	3603.19	-0.738307	0.000490373	0.00894585
PLRG1	656.728	-0.361574	0.000491153	0.00894911
SLC16A3	2138.76	1.06061	0.00049534	0.00901434
TRMT61A	309.462	-0.404289	0.000496082	0.00901681
GNPDA1	184.783	1.10333	0.00050245	0.00912141
RNASE1	30.4605	3.34743	0.000505706	0.00916932
ANG	572.679	1.51325	0.000507709	0.00919442
SRXN1	21.311	1.78648	0.000513241	0.0092833
PHF12	382.45	-0.650782	0.000514818	0.00928921
TRPT1	501.437	0.563862	0.00051435	0.00928921
DNTT	14.4207	-2.52765	0.000520227	0.00934277
GRAP	2919.67	-0.781269	0.000518637	0.00934277
RBM47	673.202	2.28263	0.000520299	0.00934277
C1QB	1376.29	3.97186	0.000519582	0.00934277
CCDC149	72.3392	2.5778	0.000521809	0.00935858
PAIP2B	28.6388	-1.45911	0.000524738	0.00939976
ENSMMUG00000053715	2.47011	4.42473	0.000526121	0.00941321
ARSB	391.619	1.20492	0.00053129	0.00949425
ENSMMUG00000050460	166.025	1.08461	0.000533151	0.00951607
ZNF703	661.969	1.65753	0.000534924	0.00953628
SLC2A6	1109.61	1.77014	0.000535689	0.00953847
SEC31B	207.632	1.04086	0.000541665	0.00963335
PRAM1	320.572	1.56746	0.000543193	0.00964117
ENSMMUG00000054052	1908.52	2.85439	0.000543402	0.00964117
ATP6V0D1	2221.2	1.2271	0.000544382	0.00964705
LITAF	2039.3	2.67673	0.000549129	0.00971958
PTX3	446.367	2.18394	0.00054992	0.009722
ODF2	1187.25	-0.355829	0.000551855	0.00973307
NPL	464.353	1.48662	0.000551289	0.00973307
LBR	1705.86	-0.434865	0.000552858	0.00973921
COX6B1	437.497	0.907518	0.000560294	0.00985852
VMP1	1375.67	0.77744	0.000566553	0.00995687
GPRIN3	1654.13	0.543535	0.000576825	0.0101016
NR1H3	97.391	2.21313	0.000576153	0.0101016
SLC2A5	68.6006	3.57505	0.000576381	0.0101016
MAP2K6	256.919	-0.748808	0.000577628	0.0101037
TMEM102	79.4984	-0.836765	0.000579806	0.010118
TTYH3	893.155	1.71894	0.00057978	0.010118
PDE12	678.262	-0.354877	0.000581668	0.0101386
CEBPA	257.598	1.95276	0.00058364	0.0101611
MTSS1	578.765	1.34791	0.000584768	0.0101688
TDP2	289.965	-0.612529	0.000587709	0.0102018
GTPBP1	1892.57	-0.318761	0.000588036	0.0102018
PHAX	381.515	-0.450327	0.000591762	0.0102425
TOR4A	40.7967	1.36768	0.000592448	0.0102425
SEMA4A	1980.38	1.75609	0.000591264	0.0102425
RFXANK	517.662	0.41815	0.00059343	0.0102475
GNAQ	424.48	0.999435	0.000596354	0.0102861
MATR3	7764.61	-0.349027	0.000597499	0.0102939
VEGFA	1598.65	2.11161	0.000600947	0.0103413
CD244	157.836	-0.821181	0.000604332	0.0103875
HECTD1	1325.04	-0.360811	0.000606636	0.0104043
Metazoa_SRP.3329	4.4149	4.50812	0.000606707	0.0104043
CDC23	484.519	-0.511241	0.000610316	0.0104541
LRTM2	7.00821	4.51196	0.000612444	0.0104785
TLR6	70.3349	1.39439	0.000613555	0.0104854
MAP3K11	1942.15	0.801422	0.000616746	0.0105279
SIGLEC6	269.024	2.32535	0.000620216	0.010575
ADNP	866.653	-0.524226	0.000622781	0.0106065
ACSS1	1868.56	-0.517708	0.000623769	0.0106112
TAF1	974.716	-0.459279	0.000624753	0.0106158
KIAA0930	466.163	1.17802	0.000626225	0.0106165
TNS3	253.383	1.84918	0.000625729	0.0106165
RNF175	15.4202	2.74287	0.000627155	0.0106202
CTH	50.6446	1.95823	0.000629	0.0106393
DNASE1L1	363.257	1.09027	0.000638058	0.0107803
KCNG3	9.81439	-1.71389	0.000643459	0.0108592
FAM168B	1457.34	-0.438464	0.000647226	0.0109104
ENSMMUG00000050044	82.0678	0.79288	0.000648928	0.0109267
CPNE2	559.222	2.1687	0.000651612	0.0109595
RRAGA	1215.08	-0.350055	0.000654086	0.0109886
CLCN5	120.64	2.19447	0.000655089	0.0109931
MLF1	35.9013	1.27511	0.000657386	0.0110192
C5AR2	177.588	3.19341	0.000658186	0.0110202
INPP5F	300.965	-0.475015	0.000659076	0.0110227
PPM1D	550.889	-0.649668	0.000659965	0.0110251
REPS1	1359.48	-0.60991	0.000661261	0.0110344
STAC3	362.457	3.05539	0.000665118	0.0110769
ENSMMUG00000050761	256.289	4.54692	0.000665298	0.0110769
MORN4	40.9614	-0.93229	0.000668648	0.0111202
CMTM2	9.96859	4.2553	0.000671271	0.0111514
RAP1GAP2	612.015	0.915488	0.000676934	0.0112329
EVI5	85.8108	1.42465	0.000683614	0.0113185
COMP	27.647	3.15772	0.000683587	0.0113185
ENSMMUG00000052761	48.7984	3.90032	0.000687349	0.0113676
PM20D2	5052.8	-0.483572	0.0006988	0.0115355
VMO1	1251	2.16638	0.000699054	0.0115355
MYLK	42.5299	2.82315	0.000700139	0.0115406
PYURF	2589.35	-0.286153	0.000707645	0.0116515
TGFB1I1	11.0986	3.72661	0.000708643	0.011655
WDR20	239.434	-0.43272	0.000715708	0.0117582
PLCB1	124.013	1.8051	0.000720689	0.0118258
DHRS9	150.711	2.29594	0.000721439	0.0118258
UAP1L1	80.4483	2.61835	0.000722213	0.0118258
TRAV41	16.6111	-1.20878	0.000728108	0.0118952
ATP2A2	648.492	0.760515	0.000728851	0.0118952
IL1A	29.7107	2.7633	0.000727728	0.0118952
OXER1	48.1821	1.8191	0.000732666	0.0119444
RFX8	71.7142	-1.73999	0.000735924	0.0119646
TREX1	241.625	1.03147	0.000737022	0.0119646
OLFM1	234.101	2.38943	0.000737073	0.0119646
CSF1R	6793.14	2.82445	0.000737123	0.0119646
ZNF516	340.312	1.42381	0.000739071	0.0119831
LTA4H	1117.76	1.61255	0.000740359	0.0119909
LGALS8	328.038	0.58598	0.000742516	0.0120128
GPR35	198.985	1.8998	0.000744339	0.0120292
PFKFB3	4038.53	1.04151	0.00074623	0.0120466
ENSMMUG00000001764	2639.21	2.99401	0.000751087	0.0121119
ABT1	1762.6	-0.454792	0.000752807	0.0121134
RSL1D1	2348.69	-0.43551	0.000752625	0.0121134
AKR1C1	82.6057	1.86028	0.000755775	0.012148
SLC25A38	1229.91	-0.372086	0.000758387	0.0121649
XRN2	1957.24	0.268543	0.000758465	0.0121649
TGFBI	2569.83	2.77575	0.000760468	0.0121839
WAC	2877.31	-0.398453	0.000763091	0.0122127
CREBRF	1190.21	-0.545072	0.000773525	0.0123664
CBR1	639.026	0.737896	0.00077663	0.0124027
GOLPH3L	24.0051	-1.13233	0.000782609	0.0124714
SF1	6250.52	-0.341008	0.00078238	0.0124714
STK3	105.929	0.628655	0.000785244	0.0125
CACTIN	321.671	-0.455324	0.000787815	0.0125275
ENSMMUG00000016636	563.462	-0.581029	0.000790792	0.0125485
TMEM51	33.622	1.86678	0.000790824	0.0125485
SLC6A6	1669.84	1.23293	0.000792366	0.0125594
NUDT6	17.8708	2.38312	0.000793198	0.0125594
U6.669	3.91641	4.30796	0.000794792	0.0125712
PLEKHO2	217.817	1.41462	0.000798999	0.012611
MT1X	48.0693	1.93147	0.000798753	0.012611
ADORA2B	192.62	2.33565	0.000800338	0.0126187
FASTKD1	121.944	-0.642607	0.000802247	0.012622
MYB	199.239	1.89616	0.000801883	0.012622
ENSMMUG00000049629	60.6034	-1.14155	0.000812087	0.0127633
APLP2	7912.63	1.1579	0.000813239	0.0127679
LMO2	561.411	1.76534	0.000819291	0.0128494
EMSY	498.879	-0.545068	0.000822463	0.0128855
ITPKB	3340.3	-0.670151	0.000824888	0.0129099
RSRC2	1639.95	-0.42305	0.000833801	0.0130357
SLCO4A1	182.302	1.82585	0.000838906	0.0131017
ROR2	9.19097	-2.57288	0.000840522	0.0131132
SYF2	1160.91	-0.436308	0.00084191	0.0131211
SKP2	97.7423	-0.813701	0.000846202	0.0131742
AOX2	53.7362	2.39672	0.000847909	0.0131869
RGS17	5.70968	3.62933	0.000850261	0.0132097
CRTAM	10.1401	-1.73032	0.00085312	0.0132403
STAG1	1136.1	-0.410924	0.000854853	0.0132404
POLD4	710.878	0.666853	0.000855758	0.0132404
SLC6A9	41.2657	0.918078	0.000856689	0.0132404
TLR1	85.2924	1.66297	0.000856223	0.0132404
HECA	1050.78	-0.452916	0.000859715	0.0132734
GTF3C5	462.273	-0.336329	0.000861837	0.0132923
GNS	2453.74	1.6152	0.000864289	0.0133163
TPM4	1723.95	1.08884	0.000865415	0.0133199
BTN2A2	3508.05	-0.51695	0.000872351	0.0134127
TNFAIP2	423.022	2.10516	0.000873367	0.0134145
ABI2	253.783	-0.539565	0.000876596	0.0134502
HNRNPU	8297.15	-0.289364	0.000888383	0.013617
FCAR	405.766	3.23212	0.000894945	0.0137034
PITPNA	301.678	1.08208	0.000901797	0.0137376
ACSS2	377.191	1.37117	0.000901191	0.0137376
LONRF3	229.174	1.8584	0.000900499	0.0137376
WFS1	342.078	1.8655	0.000898763	0.0137376
ENSMMUG00000056339	3.71477	4.21991	0.000899916	0.0137376
LHFPL6	77.3183	-2.03806	0.000903691	0.0137524
GAB2	355.412	1.98621	0.000908323	0.0138087
PIBF1	309.773	-0.414026	0.000911113	0.0138108
SORT1	292.374	1.97384	0.000911243	0.0138108
C1QC	1271.65	3.91432	0.000910028	0.0138108
CSPG5	32.8732	-1.16141	0.000922942	0.0139313
SOCS5	163.955	-0.506936	0.000920289	0.0139313
IQSEC2	16.6374	2.65652	0.000921334	0.0139313
ENSMMUG00000063725	1796.51	3.84784	0.000922917	0.0139313
ACTR8	182.789	-0.501501	0.000925184	0.013951
SC5D	190.963	0.601394	0.000928781	0.013979
CCL7	99.4237	3.78569	0.000928922	0.013979
ADAP2	256.435	3.72579	0.000932106	0.0140127
HNRNPA0	4276	-0.522025	0.000935369	0.0140355
RXRA	674.805	1.47236	0.000935513	0.0140355
FAM76A	478.545	-0.617147	0.000936629	0.0140381
CLSTN1	4543.15	-0.369514	0.000938728	0.0140443
KYNU	268.94	1.95513	0.000938932	0.0140443
MPEG1	10769.5	2.86644	0.000942107	0.0140776
CCDC9B	15.0703	2.26394	0.000943535	0.0140848
ENSMMUG00000050531	16.8202	1.8009	0.00094584	0.0141051
KLF4	2833.4	2.00582	0.000948512	0.0141166
ENSMMUG00000003289	239.103	3.077	0.000947913	0.0141166
ENSMMUG00000011916	124.215	0.954391	0.00095616	0.0141455
MYL12B	3557	0.495309	0.000955914	0.0141455
CDK6	577.027	1.02373	0.000954472	0.0141455
SLC36A4	315.803	1.3942	0.000954563	0.0141455
CLEC4A	159.228	1.80019	0.000955835	0.0141455
CLEC4G	45.3423	2.87911	0.000955276	0.0141455
MTO1	228.572	-0.436673	0.000959917	0.0141728
CMKLR1	54.763	3.91057	0.000959714	0.0141728
KANSL1	2138.46	-0.479246	0.000961465	0.0141789
ELOVL7	13.6931	2.92263	0.000962232	0.0141789
DES	70.4222	1.97157	0.000967834	0.0142473
HIF1A	4477.26	1.09447	0.000969386	0.014256
NR2F6	118.316	1.93205	0.000970707	0.0142613
JADE2	1605.14	-0.565417	0.000971834	0.014262
EAF1	854.401	1.24017	0.000973066	0.014262
Metazoa_SRP.3194	2.91772	3.88606	0.000973632	0.014262
BMP6	8.96949	3.25444	0.000981739	0.0143666
PPP4R3B	974.22	-0.302337	0.000986601	0.0144236
ENSMMUG00000050007	398.117	-5.07956	0.000988787	0.0144272
LATS2	79.4898	1.81921	0.000987919	0.0144272
TCF7L2	78.7594	1.59846	0.000998632	0.0145565
PLCL2	1625.43	-0.449708	0.00100169	0.0145725
TRIM5	379.022	0.856197	0.00100135	0.0145725
TBC1D17	507.387	-0.473963	0.00100703	0.0146098
ZNF800	937.262	-0.323347	0.0010072	0.0146098
APOL6	469.985	0.625725	0.00100715	0.0146098
PARG	484.2	-0.448854	0.00101062	0.0146451
ZBTB44	151.949	-0.405412	0.00101169	0.0146464
RAB32	292.073	1.8804	0.00101566	0.0146896
C14H11orf68	567.858	-0.453258	0.00101797	0.0147087
MMP25	299.423	1.06902	0.00102513	0.0147976
AK4	7.316	2.51511	0.00102716	0.0148092
ABCA6	52.6744	2.5421	0.00102792	0.0148092
ENSMMUG00000064092	32.33	-2.78998	0.00103023	0.0148278
USP47	2647.5	-0.417404	0.00103121	0.0148278
LBH	452.978	-0.998423	0.00103422	0.0148567
CDC42EP3	574.906	0.918134	0.00103681	0.0148796
ZNF618	485.785	-0.854252	0.00104101	0.0149111
ARHGAP6	40.7355	1.85695	0.00104071	0.0149111
DCBLD1	21.8265	1.42263	0.00104243	0.014917
CFD	7268.74	2.60767	0.00105385	0.0150661
ENSMMUG00000047632	98.354	3.96948	0.00106084	0.015125
SELENOM	177.16	-1.034	0.00106024	0.015125
FNDC11	67.8661	-0.964067	0.00106164	0.015125
ENSMMUG00000020643	952.974	0.67475	0.00106307	0.015125
ATG7	280.903	0.94953	0.00106241	0.015125
GID4	114.066	-0.597106	0.00106409	0.0151252
ENSMMUG00000063855	1131.92	-0.588096	0.00107073	0.0151561
INPP5B	405.641	-0.427823	0.00107136	0.0151561
OAZ1	16213.3	0.995934	0.00106823	0.0151561
PRSS55	370.726	1.0064	0.00106834	0.0151561
NFE2	146.913	2.2649	0.00107065	0.0151561
ENSMMUG00000008718	234.119	-0.715176	0.00107475	0.0151895
PLEKHA3	273.417	-0.407203	0.00107581	0.0151901
ZNF256	532.558	-0.650083	0.00108157	0.0152569
ELOVL4	60.8293	-1.38854	0.00108686	0.015313
NPR2	81.2937	-0.896171	0.00108776	0.015313
YWHAE	392.886	0.634001	0.00109018	0.015313
MANBA	290.753	1.07697	0.0010907	0.015313
ACAD10	3376.56	1.56432	0.00108947	0.015313
YES1	4.22415	4.43332	0.00109335	0.0153358
IVD	472.11	0.444519	0.00109479	0.0153415
CD5L	28.1423	3.66418	0.00109706	0.0153588
S1PR1	9857.99	-0.697534	0.00110017	0.0153879
LDHA	11413.9	0.913841	0.00110188	0.0153973
STMN3	2408.82	-1.11264	0.00110608	0.0154163
CHTF18	100.862	-0.855798	0.00110608	0.0154163
ENSMMUG00000006778	710.1	-0.547417	0.00110842	0.0154163
PBXIP1	6250.26	-0.331251	0.00110843	0.0154163
GPR84	74.6299	2.58817	0.00110716	0.0154163
PFKFB4	178.307	1.6362	0.00111346	0.0154719
CD300E	12.2584	2.72216	0.00111784	0.0155183
ENSMMUG00000055241	480.362	1.05357	0.00112207	0.0155624
FBXO6	381.198	0.673101	0.0011244	0.0155802
GADD45A	1283.48	-0.580998	0.00112853	0.0156229
STARD9	14.3881	1.62028	0.00113229	0.0156603
TMED5	583.875	1.09842	0.0011335	0.0156625
CGA	376.14	-1.55739	0.00113543	0.0156746
TWIST2	20.3158	2.49313	0.00113719	0.0156844
ZSWIM1	327.559	-0.37814	0.00114382	0.0157611
ALOX12	95.0195	0.666542	0.00114597	0.0157762
PRR14L	391.135	0.431646	0.00114704	0.0157763
IKBKB	1169.98	-0.573247	0.00114928	0.0157829
GRIN2C	88.5993	0.815242	0.00115057	0.0157829
WWC2	92.3082	2.41305	0.0011507	0.0157829
FAXDC2	1015.06	-0.296548	0.00115212	0.0157878
LAMTOR2	866.356	1.00745	0.00115355	0.0157928
ICE2	339.642	-0.430128	0.00115672	0.0158217
CARS1	756.77	0.565194	0.00115994	0.0158511
MT2A	740.277	1.43295	0.00116562	0.0159141
EIF4EBP1	468.84	1.21941	0.00116981	0.015942
CXCL6	15.4986	2.4452	0.00116935	0.015942
PTTG1IP	1372.2	1.23001	0.00117297	0.0159705
SLC24A3	52.0162	2.36492	0.00117461	0.0159782
SYN1	274.976	1.52015	0.0011827	0.0160735
ITGA9	47.8621	2.94671	0.00118468	0.0160857
MDM2	448.627	0.9079	0.00118599	0.0160888
CAPZB	4393.41	0.378186	0.00119294	0.0161684
GCC1	1098.72	-0.753251	0.00119916	0.0162333
PRKACA	180.614	0.95703	0.00120101	0.0162333
SGK1	3567.45	1.39241	0.00119996	0.0162333
MAP3K8	1805.56	1.72945	0.00121692	0.0164334
C10H20orf27	863.053	1.10521	0.0012185	0.0164398
CCNG2	584.304	-0.557424	0.00122843	0.016498
CNOT6L	877.474	-0.540025	0.001228	0.016498
PPP2R5A	1176.31	-0.373431	0.00122947	0.016498
SIN3B	887.9	-0.332993	0.00122515	0.016498
BACE2	197.059	0.681499	0.00122502	0.016498
SERPINB10	128.743	2.18736	0.00122827	0.016498
PDE4B	7347.99	-0.476044	0.00123279	0.0165127
CTNNA1	344.361	1.58305	0.00123231	0.0165127
TTC39B	126.329	0.953017	0.00123835	0.0165723
ANKRD13C	1033.35	-0.475142	0.00124314	0.0165929
G2E3	403.961	-0.35322	0.00124118	0.0165929
RGS19	2695.62	0.829992	0.00124324	0.0165929
PIK3AP1	1158.96	1.57648	0.0012463	0.0166188
ZNF12	569.268	-0.530731	0.00125006	0.016654
ZNF24	1417.76	-0.402025	0.00125137	0.0166566
RETREG3	1605.26	-0.429166	0.00125787	0.0166982
ARRB1	448.436	1.26113	0.00125648	0.0166982
GFAP	19.0237	3.18992	0.00125777	0.0166982
SURF6	375.622	-0.419176	0.00126031	0.0167156
ENSMMUG00000042343	1129.74	2.78801	0.00126322	0.0167394
CEBPB	808.528	1.25169	0.00126464	0.0167433
LYPLA2	129.574	0.6669	0.0012671	0.0167609
SNX13	408.793	-0.489704	0.00126988	0.0167827
BMX	9.98166	3.00817	0.00127151	0.0167893
LRRC75B	75.4497	-0.680584	0.0012777	0.0168562
FBXL3	1017.74	-0.619018	0.00128458	0.0168775
KBTBD4	261.283	-0.469675	0.00128613	0.0168775
RBM5	2445.02	-0.378259	0.00128577	0.0168775
WASHC3	387.242	0.687638	0.00128075	0.0168775
PLCD1	302.03	1.48294	0.00128227	0.0168775
Metazoa_SRP.3108	9.26055	1.92273	0.00128373	0.0168775
CPVL	6884.77	2.64389	0.00128966	0.0169089
ENSMMUG00000056922	65.1273	1.60579	0.00129216	0.0169267
CS	2041.49	0.477268	0.00129766	0.0169839
NUP107	425.912	-0.516041	0.00130048	0.0170058
LOXL3	19.6512	1.53319	0.00130339	0.0170289
ENSMMUG00000011787	1035.61	-0.472383	0.00130707	0.0170618
FARP1	12.3542	1.65182	0.00130821	0.0170618
KPNA1	1278.49	-0.330661	0.00131425	0.0171255
ABCB8	211.481	0.548116	0.00131592	0.0171282
MRC2	155.523	1.74938	0.00131676	0.0171282
VNN2	83.1848	3.33392	0.00131944	0.0171481
S100A6	2502.45	1.2661	0.00132295	0.0171786
TKT	4169.65	1.0174	0.00132449	0.0171837
ATP2C1	265.076	0.752027	0.00133079	0.0172504
ZFP36L2	19061.3	-0.762188	0.0013331	0.0172652
TRAP1	817.639	-0.359375	0.00133905	0.0173273
THAP9	129.901	-0.817234	0.00134146	0.0173282
SYNGR4	10.4651	3.94606	0.00134116	0.0173282
RASSF1	4264.77	-0.672755	0.00134802	0.0173979
LPAR2	552.782	-0.453909	0.0013534	0.0174522
TUBB2B	6510.02	-0.434227	0.00135703	0.0174792
CCL4L1	1188.29	2.47112	0.00135784	0.0174792
CPSF7	1804.53	-0.317062	0.00136147	0.0174804
LPCAT3	846.96	0.524109	0.00135918	0.0174804
ENSMMUG00000057388	48.9942	1.29659	0.0013604	0.0174804
ZNF367	135.769	-0.593658	0.00136807	0.0175206
IL13RA1	914.382	2.13383	0.00136813	0.0175206
F3	42.6769	2.53799	0.00136597	0.0175206
PLEK	1140.45	1.60342	0.00137322	0.0175706
KLHL11	245.807	-0.639461	0.00137487	0.0175766
DIPK2A	343.535	-0.338282	0.00138428	0.0176363
ITPRID2	191.352	0.835782	0.00138244	0.0176363
TMEM255A	15.8282	2.29913	0.00138102	0.0176363
ENSMMUG00000055902	7.09067	2.86281	0.00138369	0.0176363
YTHDC2	474.212	-0.343992	0.00138834	0.0176577
MTARC2	95.4559	2.56398	0.00138802	0.0176577
PCYOX1	937.341	0.747094	0.00139111	0.0176778
CASP6	106.511	0.64364	0.00139885	0.0177458
IER3	1200.45	2.77376	0.00139776	0.0177458
GSDMD	3049.67	0.435637	0.0014005	0.0177516
SMURF2	341.574	-0.6233	0.00140279	0.0177624
NCF1	781.557	1.57193	0.00140374	0.0177624
CEACAM5	125.435	3.01255	0.00140682	0.0177862
R3HCC1L	576.641	-0.460848	0.00141668	0.0178957
ENSMMUG00000048321	403.483	2.83216	0.00142581	0.0179806
SLC41A2	13.3262	-1.30234	0.00142582	0.0179806
FCMR	5022.33	-0.828253	0.00142741	0.0179854
CHD2	3109.17	-0.494574	0.00143619	0.0180807
DCAF5	2641.51	-0.355147	0.00144319	0.0181534
TANC2	152.651	-0.829568	0.00144577	0.0181561
ITPRIPL2	25.9126	2.85856	0.00144584	0.0181561
SPARC	12.4147	3.48434	0.0014499	0.0181916
CDC42BPB	176.798	1.08275	0.00145292	0.0181988
ANXA2	10063.9	1.09788	0.00145263	0.0181988
IL7R	2821.02	-0.724204	0.00145666	0.0182304
IQGAP1	10053.2	0.566268	0.00146871	0.0183657
CTTN	182.175	2.25794	0.00147242	0.0183966
BEND5	152.87	-0.736183	0.00147992	0.0184438
ENSMMUG00000063732	257.949	-0.450629	0.00147847	0.0184438
RNF139	2196.45	-0.392267	0.00147946	0.0184438
WBP11	2460.32	-0.393256	0.00149084	0.0185643
DBI	1503.61	0.524239	0.00149961	0.0186579
ZNF343	203.525	-0.551788	0.00150572	0.0187183
ENSMMUG00000063695	43.0265	-1.08266	0.00151114	0.0187543
CLEC1B	23.3956	2.73828	0.00151018	0.0187543
MIS12	616.192	-0.550265	0.00152469	0.0189067
IREB2	439.863	-0.378412	0.00153039	0.0189539
MRC1	102.577	2.44143	0.00153105	0.0189539
RHOQ	82.0197	1.46343	0.00153571	0.0189958
ENSMMUG00000015749	856.74	1.09839	0.00153843	0.0190136
EPB41L3	623.172	2.65901	0.0015409	0.0190283
PPP4R3A	2322.93	-0.374008	0.00154698	0.0190875
VIRMA	568.447	-0.484346	0.00154914	0.0190983
TBL1Y	79.3994	1.26885	0.00155175	0.0191147
IP6K1	1149.23	-0.449155	0.00155751	0.0191697
TAX1BP3	999.373	0.883871	0.00156289	0.01922
CCSAP	257.415	-0.797362	0.00157103	0.0193042
TMEM104	284.536	1.04531	0.00157369	0.0193209
GMPR	91.3848	1.6149	0.00157702	0.0193414
ENSMMUG00000058644	127.239	1.9066	0.00157796	0.0193414
ENSMMUG00000054688	6.20019	2.86225	0.00158312	0.0193887
DESI1	298.766	0.740814	0.00158892	0.0194277
ENSMMUG00000014526	110.089	0.944079	0.00158793	0.0194277
C2H3orf38	462.734	-0.515831	0.00159067	0.0194331
BLOC1S5	803.556	0.500155	0.00160231	0.0195592
FST	31.3542	-1.05525	0.00160426	0.0195669
TERB1	161.333	-0.765233	0.00163186	0.0198292
ENSMMUG00000056470	1237.97	-0.65304	0.00163376	0.0198292
SEPHS2	1985.4	-0.459938	0.00162756	0.0198292
RNF135	90.3292	0.844223	0.00163321	0.0198292
HEBP1	137.479	1.30019	0.00163115	0.0198292
RAB11FIP5	351.603	1.66207	0.00162896	0.0198292
ENSMMUG00000021075	3335.59	1.02989	0.0016351	0.0198292
SNORA2C	70.3622	-0.684383	0.00163916	0.0198623
ARL11	159.612	0.890451	0.00164348	0.0198908
ENSMMUG00000064937	12.6073	1.36641	0.00164419	0.0198908
NUP160	671.149	-0.474285	0.00164573	0.0198933
APP	742.06	0.504029	0.00165466	0.0199329
BHLHE40	6885.67	1.35027	0.00165571	0.0199329
LTBP1	72.5041	1.82262	0.0016555	0.0199329
TULP2	37.681	1.83076	0.00165449	0.0199329
SCARF1	33.6572	1.945	0.0016516	0.0199329
CCRL2	21.8119	1.83934	0.00166238	0.019997
COMMD4	458.858	0.780988	0.00167614	0.0201462
USH1C	124.218	-0.867943	0.00168687	0.0202424
ETS2	1722.11	1.71781	0.0016865	0.0202424
PPFIA3	17.5683	1.74487	0.00169744	0.0203529
ATP6V0A1	819.028	1.17366	0.0016995	0.0203611
GZMB	1924.61	-1.47738	0.00170212	0.0203761
MTHFR	494.033	0.702677	0.0017089	0.0204244
TKTL1	70.1625	2.01406	0.00170864	0.0204244
C12H2orf88	37.8022	2.37799	0.00171331	0.0204607
ENSMMUG00000051545	725.83	-0.898654	0.00172078	0.0205194
SLC8A1	98.2632	2.27925	0.00172099	0.0205194
CHIT1	251.728	3.45447	0.0017283	0.02059
CNIH4	562.286	0.888415	0.00173508	0.0206542
UNC93B1	2161.53	1.21088	0.00173668	0.0206568
COPS2	610.36	-0.322496	0.00174003	0.0206636
CDKN1C	63.027	1.40336	0.00173989	0.0206636
CIAO2A	432.012	0.616298	0.00174229	0.0206739
IL17RC	11.4162	2.93458	0.00174409	0.0206788
CTDSPL2	615.255	-0.463127	0.00174892	0.0207195
RBM38	4029.96	-0.91448	0.0017534	0.0207561
ENSMMUG00000021460	191.38	1.18705	0.0017586	0.020801
MINDY2	694.349	-0.500823	0.00176124	0.0208156
SIRT1	718.944	-0.462096	0.00176965	0.0208813
TP53I3	29.0683	1.82241	0.00176846	0.0208813
EPHB2	70.5834	2.1334	0.00177101	0.0208813
PID1	77.578	1.98521	0.00177712	0.0209368
CNTNAP2	18.0547	-3.58255	0.00177982	0.020952
ARHGAP45	17938.6	-0.435517	0.0017879	0.0210304
ACACB	19.0982	-1.6108	0.00179333	0.0210752
SOWAHD	21.7775	1.49909	0.00179454	0.0210752
STX1A	130.828	1.18233	0.00180016	0.0211245
ENSMMUG00000061286	120.959	1.13511	0.00180296	0.0211407
ENSMMUG00000059638	95.7785	-0.943531	0.00182099	0.0213185
RALGAPB	1081.78	-0.301865	0.00182092	0.0213185
RHOBTB1	106.058	-1.14101	0.00184686	0.0215704
PRPF38A	646.806	-0.402935	0.00184451	0.0215704
KCNK6	162.427	1.18837	0.00184582	0.0215704
LAMP2	1621.69	1.08506	0.00185544	0.0216536
MFSD2B	41.2098	2.82147	0.00185764	0.0216623
CST3	8079.91	1.99892	0.00186706	0.021755
MOCS3	452.483	-0.570668	0.00188431	0.0219388
GNG11	215.379	1.68148	0.00189081	0.021991
ENSMMUG00000054212	7.03437	2.59485	0.00189175	0.021991
RGS16	427.438	-0.755502	0.00189725	0.0220378
CDH23	211.831	1.10232	0.00189938	0.0220452
ZBED3	6.03245	2.91998	0.00190835	0.0221321
CTIF	31.3837	1.18633	0.00192312	0.0222861
MRAS	28.5158	2.91288	0.00192614	0.0223036
DDX41	790.528	0.458244	0.00192866	0.0223154
GSTP1	6457.57	0.66894	0.0019363	0.0223864
ERRFI1	173.221	-0.735599	0.00194134	0.0224099
VAT1	1899.99	1.14079	0.00194005	0.0224099
ZNHIT2	283.32	-0.448941	0.00195372	0.0225352
SLC7A8	471.414	2.83711	0.00196769	0.0226788
CASC3	2502.23	-0.321819	0.00197526	0.0227484
XRCC2	18.9535	1.95581	0.00197918	0.0227759
ENSMMUG00000061919	18.2438	2.41601	0.00199278	0.0229146
HEATR5B	458.116	-0.344245	0.00201326	0.0231323
IFNGR1	1827.34	1.11595	0.0020291	0.0232963
IRF5	598.95	1.13654	0.00204234	0.0234302
RNF26	1776.67	-0.320927	0.00205973	0.0236115
ENSMMUG00000002075	746.521	2.00026	0.0020733	0.0237305
ENSMMUG00000049996	89.8727	0.841468	0.00207326	0.0237305
PADI4	24.0095	3.2874	0.00208496	0.0238272
TALDO1	4626.87	0.681561	0.00208484	0.0238272
STYXL1	624.658	1.12646	0.00208892	0.0238541
JADE1	1012.16	-0.535996	0.00210426	0.023974
API5	1232.3	-0.35722	0.0021015	0.023974
RNF149	3206.32	1.03739	0.00210301	0.023974
ATP11A	439.836	0.811143	0.00213664	0.0243243
ZBTB4	494.875	-0.714426	0.00214479	0.0243965
SLC15A3	214.609	1.6133	0.00214626	0.0243965
SENP2	873.552	-0.37409	0.00215337	0.0244409
IL1B	6935.85	2.48574	0.00215345	0.0244409
ZFP62	94.1204	-0.806932	0.00216323	0.0245148
SGSH	1053.55	0.923486	0.00216447	0.0245148
ENSMMUG00000057084	23.8338	1.17642	0.00216491	0.0245148
QSOX1	1226.6	1.04207	0.00217884	0.0246537
GALNS	931.772	1.13802	0.00218337	0.0246862
GP1BA	7.61118	3.79522	0.00219272	0.0247731
SEMA4B	1144.92	-0.893986	0.00219748	0.0247747
CSDE1	6411.24	-0.228486	0.00219882	0.0247747
ENSMMUG00000050863	40.0641	1.24118	0.00219511	0.0247747
GAS7	660.539	1.83874	0.00219953	0.0247747
PARP16	242.771	-0.661504	0.00220341	0.0247809
NLRP3	801.87	2.79122	0.0022023	0.0247809
HIVEP2	2070.7	-0.608798	0.00220738	0.0248067
TMEM63A	1228.79	-0.736148	0.00221275	0.0248484
SLC8B1	2029.38	0.422201	0.00222654	0.024981
ZCCHC24	21.7472	2.26409	0.00222793	0.024981
ENSMMUG00000032338	20.8508	1.76993	0.00223312	0.0250204
RESF1	2560.98	-0.400127	0.00224413	0.0251059
Metazoa_SRP.2017	13.0562	1.47055	0.0022432	0.0251059
ENSMMUG00000056082	46.2741	1.24237	0.00225986	0.025206
KCTD12	491.361	2.66939	0.00225961	0.025206
ENSMMUG00000058233	2075.98	2.69668	0.00225944	0.025206
ENSMMUG00000049424	3.15545	-3.4552	0.00225785	0.025206
FBXL5	1348.27	-0.476214	0.00226384	0.0252194
PMVK	686.641	0.854394	0.00226445	0.0252194
SYNE1	1911.08	-0.537965	0.00227898	0.0253622
CYBA	4287.18	1.19214	0.0022835	0.0253935
Metazoa_SRP.3206	8.23302	2.27313	0.00229063	0.0254537
ENSMMUG00000057702	14.8885	2.67866	0.00230286	0.0255343
ADCK5	904.279	0.417535	0.00230303	0.0255343
FTL	5672.26	1.14883	0.00230195	0.0255343
MAP2K3	3542.44	0.903199	0.00230624	0.0255508
FASTKD5	1076.32	-0.431555	0.00232054	0.0256617
ARRDC1	1032.25	0.412861	0.00232143	0.0256617
ADCY4	501.723	0.428065	0.00231921	0.0256617
TULP4	63.5894	0.707721	0.00233258	0.0257467
DOCK7	81.0493	1.60843	0.00233234	0.0257467
P2RY1	87.4658	2.2556	0.00234787	0.0258963
IFNAR2	2202.98	0.860022	0.00235	0.0259005
AHCTF1	1750.09	-0.353083	0.00235257	0.0259096
ANK3	74.0407	-0.939013	0.00236207	0.0259259
ARMCX4	284.774	-0.713553	0.00236212	0.0259259
STIM1	2065.85	-0.428383	0.00235987	0.0259259
CORO1C	720.117	0.993859	0.00236277	0.0259259
CBARP	5.62874	2.40819	0.00236025	0.0259259
SH3GLB1	693.399	0.906242	0.00236511	0.0259325
CAPN3	164.813	0.89326	0.00236936	0.0259599
SCML2	26.9259	-1.19185	0.00239474	0.0261944
NMT2	100.038	-0.898865	0.00240133	0.0261944
PLOD3	454.479	0.820818	0.0024001	0.0261944
ENSMMUG00000054561	17.0787	1.25464	0.00239671	0.0261944
ATP8B4	31.0372	1.90145	0.00240003	0.0261944
GNA15	703.47	1.95134	0.00239959	0.0261944
HIP1	271.035	1.61062	0.00240343	0.0261981
ENSMMUG00000000451	70.6644	1.418	0.00241021	0.0262528
MEGF9	587.694	1.45375	0.00242417	0.0263854
THAP12	674.133	-0.346857	0.00243601	0.026495
KCNQ5	136.57	-0.850666	0.00244582	0.0265628
AP5M1	530.779	-0.516188	0.00244447	0.0265628
LRP11	244.312	1.54227	0.00245894	0.0266858
C7H15orf61	906.174	-0.326008	0.00246096	0.0266882
ACER2	36.0325	1.60919	0.00246409	0.0266916
ENSMMUG00000060481	19.8371	1.97234	0.00246486	0.0266916
RHBDF1	91.9718	-0.850288	0.00246773	0.0267032
SNAPC5	596.909	-0.349985	0.00247305	0.0267413
ENSMMUG00000010783	953.408	1.29852	0.00247942	0.0267907
DYRK3	127.778	-0.559198	0.00248311	0.0267916
WDR48	574.398	-0.345267	0.0024815	0.0267916
BCL6	614.308	1.33383	0.00248512	0.0267939
ENSMMUG00000058566	17.9816	2.52085	0.00250467	0.0269851
PDE1B	122.55	1.45727	0.00251155	0.0270396
TFEC	33.2513	1.82952	0.00251514	0.0270587
PRKAA1	400.255	-0.419654	0.00252999	0.0271595
ENSMMUG00000049151	30070.2	-0.324186	0.00252929	0.0271595
RAB39A	47.0456	1.81397	0.00252876	0.0271595
MAT2B	1044.38	-0.654916	0.00253882	0.027215
RABGAP1	828.513	-0.375886	0.00253711	0.027215
RGCC	5401.69	-0.569235	0.00254958	0.0273107
BTG1	19682.3	-0.620792	0.00255218	0.0273188
ICAM3	3853.8	0.416279	0.0025585	0.0273471
ENSMMUG00000065259	10.2808	1.77071	0.00255722	0.0273471
YBX3	416.311	1.69565	0.00256563	0.0273839
LILRA2	886.298	2.65452	0.00256551	0.0273839
MRPS30	1199.53	-0.482869	0.00257626	0.0274777
CDA	53.085	4.00497	0.00258117	0.0275102
TENT2	747.11	-0.363455	0.00258508	0.0275322
CYP1B1	289.786	1.78047	0.00258744	0.0275376
IQCB1	131.424	-0.619012	0.00261182	0.0277772
FBXO33	1726.7	-0.533011	0.00261612	0.0277832
USP20	2332.93	-0.485796	0.00261565	0.0277832
PDE4D	999.115	-0.641261	0.00263227	0.0279347
BCL10	558.116	-0.340704	0.00264036	0.0280006
GAPDH	21849.4	0.580068	0.0026446	0.0280137
RAB10	1367.31	0.957042	0.00264536	0.0280137
ENSMMUG00000062821	1143.37	0.581514	0.00265691	0.028096
ZMYND15	21.213	2.61116	0.00265652	0.028096
IDO1	1269.4	1.88456	0.00266653	0.0281777
ENSMMUG00000055114	144.162	0.940021	0.00267335	0.0282096
SAT1	6178.28	1.44395	0.00267209	0.0282096
PPT1	3498.94	1.15369	0.00267687	0.0282268
CPSF6	1289.93	-0.394998	0.00269135	0.0283593
ENSMMUG00000044916	17.2492	2.067	0.0027024	0.0284555
LMAN2	3756.78	0.556594	0.0027143	0.0285606
MDM1	52.6942	-0.729634	0.00271828	0.0285823
UNC119B	295.567	-0.645815	0.00272034	0.0285837
HCFC1R1	42.762	1.75157	0.00272874	0.0286517
ADAP1	937.413	1.41275	0.00273823	0.0287311
UHRF2	1197.28	-0.342237	0.00274625	0.0287544
FUT7	126.451	0.917487	0.00274491	0.0287544
PIM3	5270.06	1.21423	0.00274624	0.0287544
ARHGAP25	1784.54	-0.529102	0.00274818	0.0287544
SLC20A1	2233.26	-0.490593	0.00275718	0.0288282
URGCP	1813.46	-0.297903	0.00277462	0.0289902
TDP1	250.596	-0.434951	0.00278083	0.0290148
CPED1	70.5469	2.02728	0.00278088	0.0290148
PER3	251.131	-0.86497	0.00278587	0.0290465
DNMBP	451.171	-0.587985	0.00279198	0.02908
BRK1	1337.63	0.55379	0.002793	0.02908
FBXW8	507.911	-0.680326	0.0027967	0.0290982
ENSMMUG00000062917	3194.74	2.67419	0.00279951	0.0291071
ADPRM	203.522	-0.629444	0.00280772	0.0291516
ARPC3	3484.99	0.579342	0.00280735	0.0291516
KLHL3	140.701	-1.00848	0.00282305	0.02927
IRX5	2.57778	3.69902	0.00282131	0.02927
INTS12	301.3	-0.381802	0.00283299	0.0293444
WDR45	789.781	0.485386	0.00283418	0.0293444
ATXN7L3B	2660.26	-0.389208	0.00283674	0.0293505
RAB24	542.916	0.829819	0.00285684	0.0295379
SEMA6B	14.9195	1.55456	0.0028636	0.0295872
ANXA11	5240.77	0.409853	0.00286935	0.0296261
NIBAN1	913.001	1.31743	0.00288061	0.0297217
SLC25A24	404.636	0.716062	0.00288913	0.0297889
STAM	288.308	-0.466921	0.00289995	0.0298591
RIPOR1	546.404	0.98941	0.00289796	0.0298591
ZCCHC3	533.54	-0.420314	0.00290422	0.0298824
TLK2	799.848	-0.323641	0.00291015	0.0299226
MAPKAPK3	2530.7	0.616615	0.00291464	0.0299361
MAP1LC3A	174.693	0.88457	0.00291549	0.0299361
THUMPD1	3216.69	-0.425765	0.00292102	0.0299722
ARHGAP12	689.662	-0.45074	0.00292403	0.0299824
RBL2	2188.81	-0.616435	0.00293444	0.0300684
IFRD2	1417.42	0.251344	0.00294057	0.0300897
SURF4	2930.52	0.621748	0.00293977	0.0300897
ENSMMUG00000063037	3.10545	3.94965	0.00295415	0.0302079
KCNH3	1019.32	0.48401	0.00295646	0.0302108
FHOD1	589.125	0.858722	0.00296373	0.0302578
ENSMMUG00000064326	31.0961	0.987943	0.00296514	0.0302578
ESRRA	230.604	0.654234	0.00296904	0.0302769
FFAR4	29.9111	2.13829	0.00298551	0.030424
KAT14	786.257	-0.320314	0.00299039	0.0304529
PIGV	146.346	-0.440077	0.00301062	0.0306157
NAGA	1617.53	0.836424	0.00300864	0.0306157
GSTO1	46.2187	1.84963	0.00301256	0.0306157
ENSMMUG00000065098	4.56579	3.16907	0.00302311	0.0307019
ENSMMUG00000006738	217.868	-0.49832	0.00302966	0.0307475
MTERF2	165.694	-0.469043	0.00304046	0.0307939
ZNF277	157.2	0.429455	0.00303888	0.0307939
RIMS3	44.4925	1.73055	0.0030403	0.0307939
MTFR1L	481.354	0.457245	0.00304789	0.0308482
CDC37L1	396.503	-0.507273	0.00305425	0.0308709
CFL1	7975.89	0.588575	0.00305428	0.0308709
ENSMMUG00000054210	920.547	2.43354	0.00305898	0.0308973
ENSMMUG00000008695	1421.02	0.644573	0.00306334	0.0309203
APAF1	295.616	0.642315	0.00306631	0.0309294
C14H11orf53	32.8271	-0.840416	0.00307661	0.0309912
EID2B	158.753	-0.661881	0.00307554	0.0309912
ST3GAL1	2886.35	-0.434453	0.00309201	0.0311252
BMT2	166.05	-0.610565	0.00310083	0.0311719
A4GALT	535.071	1.86608	0.00309882	0.0311719
ZBTB14	491.433	-0.483769	0.00310396	0.0311822
CDK13	1568.93	-0.366345	0.0031092	0.0312137
C16H17orf80	591.397	-0.362774	0.00311508	0.0312453
SNORA70.18	102.708	1.18965	0.00311654	0.0312453
NPDC1	274.543	0.893711	0.00312514	0.0313104
GP9	35.2559	2.44187	0.00317116	0.03175
PLK2	1023.62	-1.04206	0.00319517	0.0319333
LRATD2	96.4701	-0.890151	0.00320137	0.0319333
STARD7	1866.62	-0.738779	0.00320061	0.0319333
RHOT1	410.948	-0.486058	0.00319535	0.0319333
PAQR8	43.7175	1.37685	0.00320235	0.0319333
FBXO30	76.0068	1.82709	0.00320132	0.0319333
ENSMMUG00000000983	6926.75	0.446913	0.00320783	0.0319665
PAQR4	280.202	0.847521	0.00321409	0.0320075
MAML2	812.469	-0.716072	0.00321812	0.0320261
GPR157	3.00858	3.92498	0.00322559	0.032079
RMND5A	885.588	-0.311068	0.00323655	0.0321455
CISH	194.741	0.684843	0.0032366	0.0321455
Y_RNA.561	16.6315	1.1159	0.0032541	0.0322977
ENSMMUG00000041459	65.8816	0.97796	0.0032768	0.0324871
CDKN1A	18320.8	1.21986	0.00327756	0.0324871
STEAP4	124.892	3.59132	0.0032847	0.0325363
KCNH4	107.375	0.761887	0.00329341	0.0326008
PAFAH2	101.241	-0.736312	0.00330564	0.0326133
RASA2	1488.79	-0.46417	0.00330228	0.0326133
SCAF4	882.43	-0.386924	0.00330017	0.0326133
PRDX5	1317.95	0.774248	0.00330474	0.0326133
ARHGEF40	103.274	1.60435	0.00330195	0.0326133
MPLKIP	135.731	0.497913	0.00332897	0.0328155
THAP10	32.4209	1.86248	0.00333054	0.0328155
ADAM15	1586.15	0.805426	0.00333464	0.0328341
AADAT	7.8174	2.29797	0.00334388	0.0329032
MX2	531.664	1.35699	0.00334842	0.0329262
ENSMMUG00000059287	78.8049	1.02341	0.00335972	0.0330154
SEMA3C	12.2779	3.12493	0.00336952	0.0330898
ENSMMUG00000047511	25.9292	-1.311	0.00339177	0.0332644
TDRD12	222.367	-0.600796	0.0033903	0.0332644
RAMAC	921.189	-0.354127	0.0033947	0.0332712
ING1	453.344	-0.497245	0.0034063	0.0333409
TSPAN4	302.417	1.73811	0.00340448	0.0333409
ENSMMUG00000051447	27.8342	1.9164	0.00341568	0.0334108
TMEM106A	130.787	1.13282	0.00342588	0.0334885
PSD4	3233.05	-0.411305	0.00343122	0.0334967
MYL9	114.155	1.7977	0.00343049	0.0334967
PLPPR2	98.302	1.36819	0.00343709	0.0335319
TRAC	7551.67	-0.619916	0.00344887	0.0336248
ERO1A	1748.05	0.639571	0.00345651	0.0336772
ARMC1	255.504	-0.473283	0.00346112	0.0337
MOB3B	119.431	1.92689	0.00347615	0.0338242
ENSMMUG00000063683	14.2019	1.45603	0.00348106	0.0338498
ACP3	118.632	2.91917	0.00348429	0.0338591
AKIRIN1	1837.2	-0.354429	0.00349283	0.0339199
BEST1	88.8853	1.54999	0.00349797	0.0339382
NLRP12	133.692	2.74658	0.00349928	0.0339382
ORC4	317.242	-0.408128	0.00350592	0.0339756
FURIN	2712.14	0.741075	0.0035077	0.0339756
LACC1	86.9032	1.62442	0.00351953	0.034068
GPR171	282.232	-0.700894	0.00352898	0.0341372
GJB2	59.0486	2.61583	0.0035331	0.0341462
AGPAT2	270.996	0.769894	0.0035345	0.0341462
CYP2U1	356.769	-0.552388	0.00353802	0.034158
LDLRAP1	3932.85	-0.72477	0.00354273	0.0341591
ZNF512	535.686	-0.568349	0.00354252	0.0341591
ENSMMUG00000053584	2.7677	3.80765	0.00354734	0.0341813
DIP2C	1173.95	-0.593392	0.00356496	0.0343289
ZBTB33	525.593	-0.48353	0.00357949	0.0344465
EFHD2	6285.34	1.04101	0.00358219	0.0344502
PJA1	303.584	-0.565196	0.00358783	0.0344701
AP3M2	516.342	-0.481371	0.0035889	0.0344701
PGM3	331.896	-0.300419	0.00360308	0.034584
LSM14A	3853.64	-0.360112	0.00362276	0.0347504
SGMS2	85.6463	1.85713	0.00364486	0.0349399
PLEKHA6	38.0252	-1.58535	0.00366913	0.0351349
ENSMMUG00000056468	165.166	-0.56178	0.00366993	0.0351349
STXBP3	462.445	-0.309908	0.00368555	0.0351854
FERMT3	3774.18	0.595937	0.00368504	0.0351854
LRRC8B	171.661	1.03539	0.00368703	0.0351854
IL15RA	237.525	1.12249	0.0036826	0.0351854
HEXB	1206.51	1.26371	0.00368351	0.0351854
NOTCH1	1235.23	0.557651	0.00369994	0.0352859
ENSMMUG00000058749	10.6787	1.52403	0.00371253	0.0353832
TPP1	6607.51	0.989849	0.00371562	0.03539
ZEB2	1489.83	1.4296	0.0037204	0.0353902
GASK1B	70.804	2.37834	0.00372025	0.0353902
LPIN1	677.933	-0.579231	0.00372287	0.0353911
ENSMMUG00000049789	35.3439	-0.805617	0.00372582	0.0353964
CEP135	219.244	-0.51623	0.00373137	0.0354265
ENSMMUG00000063477	13.0038	1.95494	0.00373928	0.035479
ARHGAP18	236.935	1.38688	0.00374555	0.0355159
BCAS2	1104.71	-0.537171	0.00375498	0.0355341
KRBOX4	403.928	-0.413647	0.00375596	0.0355341
MTHFD1L	571.254	0.575854	0.00375704	0.0355341
LGALS3BP	4589.88	1.23393	0.00375383	0.0355341
BPIFC	12.2204	-1.43147	0.00376258	0.035564
CLK4	1190.71	-0.458948	0.00376538	0.0355677
C14H11orf1	85.9895	-0.57826	0.00377398	0.0356201
ARHGAP31	393.03	1.33615	0.00377571	0.0356201
ITK	8472.22	-0.476913	0.00378703	0.0356367
PRELID1	2162.59	0.812319	0.00378705	0.0356367
OLR1	24.4357	2.23789	0.00378144	0.0356367
GPRC5B	46.1287	2.25026	0.00378639	0.0356367
WAPL	1599.38	-0.276531	0.00379412	0.0356806
RPA2	560.542	-0.326002	0.00381362	0.0358413
MYD88	3778.7	1.11738	0.00381639	0.0358446
ZEB1	1220.77	-0.57819	0.00382876	0.0359381
RNF122	158.633	-0.739101	0.00385344	0.0360408
HERC3	1026.1	-0.45563	0.00385267	0.0360408
PSMD13	2008.59	0.420184	0.00385364	0.0360408
PABPC1L	149.003	0.485457	0.00385561	0.0360408
SRD5A3	40.2471	0.827529	0.00384263	0.0360408
PTPN12	71.8655	1.12939	0.00385667	0.0360408
ENSMMUG00000059012	5.4692	2.39614	0.00385223	0.0360408
MAK16	230.596	-0.50986	0.00386464	0.0360473
TNS1	48.6802	1.91916	0.00386306	0.0360473
GAS6	546.593	1.93095	0.00386252	0.0360473
ENSMMUG00000004441	3607.4	0.938091	0.00386748	0.0360512
WDFY3	159.17	2.65032	0.0038711	0.0360623
ZNF616	343.369	-0.637732	0.00388063	0.0361084
SPECC1L	1736.08	-0.426662	0.0038809	0.0361084
B9D1	8.31522	2.17051	0.00388376	0.0361124
NUP43	49.1687	-0.713678	0.00389942	0.0362353
SENP7	445.527	-0.434262	0.00391319	0.0363058
SRSF8	748.651	-0.352791	0.00391676	0.0363058
TNFRSF10A	3750.26	0.349679	0.00391645	0.0363058
RAB4A	340.112	0.470131	0.00391436	0.0363058
CASP10	521.859	-0.505514	0.00392297	0.036318
B3GNT5	21.7895	2.6631	0.00392098	0.036318
ENSMMUG00000052138	14.7053	3.07789	0.00392751	0.0363374
FER1L5	801.621	0.337208	0.00393583	0.0363917
TXNDC17	80.0971	0.91023	0.00394498	0.0364536
ACOT8	384.91	0.462573	0.00395117	0.0364882
RCE1	713.436	-0.376495	0.0039706	0.0366449
OGFRL1	484.596	1.47681	0.003976	0.0366492
ARSD	33.5666	1.53375	0.00397489	0.0366492
KCTD7	130.885	-0.529176	0.00399402	0.0367895
STARD5	137.362	1.04904	0.00399617	0.0367895
TCF7	4740.53	-0.679391	0.00401266	0.0368438
DGKZ	6094.94	-0.442928	0.00401446	0.0368438
FAM120B	812.083	-0.429807	0.00400782	0.0368438
ZNF274	507.602	-0.421672	0.00400686	0.0368438
UBE2J1	3476.06	-0.275664	0.00401297	0.0368438
GAA	610.339	1.12951	0.00403263	0.0369877
PPP1R18	845.541	0.605854	0.00403907	0.037024
ITCH	1582.54	-0.305075	0.00405128	0.037113
SF3B4	1344.29	-0.251061	0.00405393	0.0371144
PLEKHG1	837.437	-0.763293	0.00405645	0.0371146
TCEA2	180.203	-0.601516	0.00405962	0.0371208
NOTCH4	29.6788	-1.00917	0.00407259	0.0371585
METTL21A	487.407	0.53472	0.00407323	0.0371585
MGST3	1219.19	0.877194	0.00407374	0.0371585
ENSMMUG00000063843	11.0789	1.96484	0.00406797	0.0371585
BATF3	103.79	1.9348	0.00407898	0.0371835
NUCB1	2238.01	0.883545	0.00408456	0.0372115
ERI1	253.993	-0.360298	0.00409491	0.037283
Metazoa_SRP.128	6.79573	2.24369	0.00411462	0.0374395
SPOP	1074.77	-0.431277	0.00412943	0.0375014
STAG2	1356.09	-0.410165	0.00413151	0.0375014
MAP4K2	2484.01	-0.387294	0.00412889	0.0375014
DNAJB12	736.949	0.389569	0.00412769	0.0375014
ENSMMUG00000050594	7.66036	2.17793	0.00414279	0.0375809
HJURP	118.191	-0.755831	0.00417496	0.0377609
AIFM3	1505.39	-0.360887	0.00417287	0.0377609
CWF19L1	372.706	0.314098	0.0041682	0.0377609
CCPG1	780.037	0.703678	0.00417494	0.0377609
ENSMMUG00000058677	97.4667	1.10942	0.00417533	0.0377609
NLRC3	1746.13	-0.665081	0.00418364	0.0378041
KIAA0319L	1049.69	-0.473231	0.00418774	0.0378041
ENSMMUG00000050359	3.51239	3.41732	0.00418684	0.0378041
KIAA1671	193.437	-0.747532	0.00419864	0.0378585
ENSMMUG00000051078	4.59507	3.75113	0.00419886	0.0378585
CMTM6	3105.89	0.849458	0.00420331	0.0378757
DPP4	2654.25	0.474556	0.00420591	0.0378762
ENSMMUG00000064052	17.0325	2.50249	0.0042093	0.0378837
WDR41	190.53	0.972937	0.00421583	0.0379195
GOLPH3	2582.6	-0.307704	0.00422018	0.0379357
PLPP6	243.117	-0.472322	0.00423957	0.0379658
SLK	1032.35	-0.310029	0.00424343	0.0379658
PTPN2	1442.45	0.32696	0.00424129	0.0379658
ATP1B3	2130.58	0.853395	0.00423723	0.0379658
SORD	56.2114	1.0706	0.00424396	0.0379658
ADRB2	622.937	1.438	0.00423337	0.0379658
MTHFD2L	30.7434	1.60098	0.00424038	0.0379658
VPS37C	5.62667	2.55461	0.00423743	0.0379658
THEM4	69.7688	1.13093	0.0042508	0.0380041
TERF2	166.022	-0.377676	0.00426968	0.0381271
NBR1	2039.35	-0.301008	0.00426747	0.0381271
MSTO1	354.029	0.553038	0.00428645	0.0382538
PPFIBP2	720.887	-0.751141	0.00429443	0.0382562
INVS	295.3	-0.346327	0.00428947	0.0382562
ENSMMUG00000056333	17.2008	1.20472	0.00429319	0.0382562
GSAP	323.488	0.835125	0.00429859	0.0382703
CHMP2A	1369.81	0.694598	0.00430479	0.0383026
ENSMMUG00000061913	462.523	-0.542678	0.0043237	0.0384353
YIPF6	127.506	0.807295	0.00432488	0.0384353
HIST1H2BK	170.632	0.861267	0.00433445	0.0384974
CCR7	11047.7	-0.690545	0.00436393	0.0387361
ENSMMUG00000065261	179.013	1.03341	0.00437793	0.0388372
MIA2	751.758	-0.370992	0.00438134	0.0388443
KCND1	107.268	0.824814	0.00439594	0.0389504
VIM	11648.9	0.917572	0.00440008	0.0389639
ICAM1	1076.5	1.34496	0.00441066	0.0390111
ENSMMUG00000063856	15.8363	2.56281	0.00440807	0.0390111
PDE8A	226.231	0.796617	0.00441485	0.039025
NFXL1	174.009	-0.541018	0.00442147	0.0390603
ADAM9	607.714	1.15914	0.00442896	0.0391032
SGMS1	448.795	-0.537372	0.00444756	0.0392441
ASRGL1	196.496	0.795248	0.00447274	0.0394429
CAPN1	3122.62	0.54867	0.00447874	0.0394724
HRH2	83.5043	1.22075	0.00448923	0.0395414
P2RY10	431.321	-0.654712	0.00449678	0.0395844
PLA1A	24.3289	1.76042	0.00450271	0.0396132
KIAA0355	999.125	-0.505457	0.00450578	0.0396168
BEND7	18.3265	1.56595	0.00450904	0.039622
ITFG2	1389.51	-0.348367	0.00451693	0.0396679
ENSMMUG00000061244	108.189	-0.972826	0.0045218	0.0396805
FAM214A	851.24	-0.344154	0.0045237	0.0396805
ABCC1	610.868	0.707257	0.00453678	0.0397717
RASGRF2	544.601	-0.842189	0.00457305	0.0400189
CABLES1	7.42971	2.37161	0.00456923	0.0400189
PTGIR	106.74	2.93248	0.00457086	0.0400189
PRPS1	582.207	-0.46226	0.00459019	0.0401216
ADGRE5	5493.92	1.10088	0.00458785	0.0401216
GRAP2	1182.04	-0.873193	0.00459362	0.040128
RAD18	56.3096	-0.698106	0.00460151	0.0401733
ALG11	202.831	-0.380055	0.00461784	0.0402484
ENSMMUG00000060167	1360.19	-0.272416	0.00461822	0.0402484
NINJ2	91.7715	2.11636	0.00461529	0.0402484
XPOT	684.204	-0.457718	0.00462864	0.0402872
SRSF6	4318.79	-0.366933	0.00463034	0.0402872
MRPS14	211.428	0.735999	0.0046308	0.0402872
RNF38	1594.92	-0.362268	0.00464806	0.040358
GNAI2.1	11310	0.576587	0.0046498	0.040358
TICAM1	593.565	0.819686	0.0046495	0.040358
ENSMMUG00000041688	205.714	1.10007	0.00464519	0.040358
EHMT2	1428.37	-0.390179	0.00466583	0.0403649
PELO	439.046	-0.361524	0.00466297	0.0403649
TMEM222	1436.02	-0.275518	0.00466058	0.0403649
PLIN2	2129.78	1.28713	0.00466689	0.0403649
EHD3	79.2934	1.97623	0.00465682	0.0403649
LILRB5	17.9296	2.75438	0.00466265	0.0403649
IFI44L	75.1477	2.30843	0.00468792	0.0404997
TMEM40	21.7643	2.49338	0.00468602	0.0404997
DBP	194.974	-0.533215	0.00469924	0.0405739
CBFA2T2	334.016	-0.438867	0.00471086	0.0406506
ENSMMUG00000059649	179.89	-0.731633	0.00471845	0.0406689
SLC17A9	84.4979	1.16543	0.00471675	0.0406689
TBC1D16	18.2543	-0.962603	0.00476129	0.0409907
FAM118A	1450.36	-0.659925	0.00475887	0.0409907
TOPORS	2115.11	-0.310756	0.00477282	0.0410647
PGRMC1	289.494	0.624072	0.00477541	0.0410647
PRDX3	1010.79	0.727064	0.00478015	0.0410817
TTC4	131.222	-0.587375	0.00478402	0.0410912
PTGDS	20.9978	1.19797	0.00479663	0.0411757
TUBGCP3	587.469	-0.438742	0.00481065	0.0412722
ENSMMUG00000058181	4.03521	3.11287	0.00482121	0.0413389
RAB33B	458.263	-0.58466	0.00482414	0.0413402
SAMD9L	400.583	0.704241	0.00484673	0.0415099
AAR2	1207.69	-0.309496	0.00486962	0.0416819
ENSMMUG00000047184	31.4086	2.05343	0.00487397	0.0416951
TBC1D22B	836.162	-0.625984	0.0048828	0.0417467
GSPT1	1405.46	-0.279552	0.00489126	0.0417767
PRKCD	661.322	0.71624	0.00489193	0.0417767
MAGEH1	2028.78	-0.625222	0.00489854	0.0418091
ING3	561.119	-0.394969	0.00491809	0.0419457
GOLIM4	209.268	0.983285	0.00492196	0.0419457
ENSMMUG00000058817	9.24016	1.6188	0.004923	0.0419457
AVPI1	380.613	-0.567093	0.00493593	0.0419745
ENSMMUG00000051878	360.163	-0.547473	0.00493976	0.0419745
UBE2O	478.11	-0.377342	0.00493432	0.0419745
MKNK1	478.483	0.914496	0.00494278	0.0419745
SHTN1	89.907	1.66778	0.00494088	0.0419745
C3	149.19	2.72701	0.00494332	0.0419745
NSUN2	636.756	-0.407999	0.00494851	0.0419945
PPAT	286.56	-0.587747	0.00495622	0.042036
CCDC12	497.157	0.48579	0.00499107	0.0423074
GSN	1254.26	0.891057	0.00499906	0.042351
ENSMMUG00000061128	2866.28	0.674884	0.00501269	0.042394
PDZD2	26.6758	1.74717	0.00501207	0.042394
ENSMMUG00000060632	22.8793	2.37693	0.00500804	0.042394
GJB6	11.1385	2.00402	0.00501804	0.0424152
KAT6A	2122.28	-0.397584	0.0050229	0.0424321
ACTA1	19.057	1.71833	0.00503427	0.042504
CGRRF1	266.542	-0.535204	0.00504392	0.0425455
ABCF1	963.239	0.328901	0.00504491	0.0425455
BCL2L1	223.788	0.513669	0.00506708	0.0426841
RHOB	589.077	1.07855	0.00506689	0.0426841
SARAF	18875.1	-0.418724	0.0050723	0.0427038
IPO11	280.59	-0.407305	0.00507916	0.042729
RELT	958.094	0.893672	0.00508103	0.042729
TIMM21	143.97	-0.680155	0.00509167	0.0427942
PHPT1	568.523	0.438964	0.00512157	0.0430212
RIF1	485.734	-0.450121	0.0051364	0.0430728
ZNF92	626.371	-0.316625	0.00513433	0.0430728
DYNC1H1	2892.39	0.401099	0.00513115	0.0430728
YWHAZ	21137.9	-0.266751	0.00514779	0.0431439
APBA1	9.45095	2.35995	0.00515525	0.0431821
DPH2	1778.11	0.966164	0.00515856	0.0431855
BBC3	253.361	-0.650053	0.00517897	0.0433319
GMPPB	283.934	0.404681	0.00518874	0.0433617
PRSS16	58.8003	1.07304	0.00518551	0.0433617
PAK1	171.476	1.77991	0.00519127	0.0433617
FGD4	48.2159	1.62245	0.00520054	0.0434147
SPTY2D1	1041.55	-0.373744	0.00523071	0.0436176
PAM	453.737	1.18039	0.00522851	0.0436176
PFDN6	358.661	0.379921	0.00524295	0.0436839
FAM110A	672.048	1.67449	0.00524453	0.0436839
PSMB3	1577.86	0.555532	0.00526923	0.0438651
LINGO3	34.8398	1.27924	0.00527266	0.043869
ENSMMUG00000058592	10.1156	2.35335	0.00527689	0.0438797
RIN2	118.021	1.67506	0.00529647	0.0440179
CCAR1	1312.43	-0.313028	0.00530418	0.0440573
ABHD2	1504.78	0.894433	0.00531987	0.044163
SUN2	6307.86	-0.329257	0.00532498	0.0441807
PLEC	4144.04	0.60168	0.00534894	0.04433
REELD1	256.087	0.835565	0.00534816	0.04433
ENSMMUG00000006443	175.473	1.02152	0.00535956	0.0443933
DMD	32.2453	-1.33852	0.0053743	0.0444906
TMEM38B	299.861	0.807378	0.00538656	0.0445672
ENSMMUG00000052585	57.7974	1.47649	0.00541773	0.0445825
DUSP16	269.936	-0.605484	0.00542256	0.0445825
ZNF408	922.022	-0.420649	0.00542266	0.0445825
UBXN7	438.467	-0.389044	0.00542812	0.0445825
PDZD11	341.362	0.530136	0.00541461	0.0445825
TGFBR1	499.575	0.59287	0.00540345	0.0445825
ENSMMUG00000058767	39.7105	0.7837	0.00539226	0.0445825
PPP2CB	71.3889	0.862219	0.00541193	0.0445825
CPQ	285.221	0.902183	0.005414	0.0445825
MGLL	77.958	1.14886	0.00540282	0.0445825
ENSMMUG00000055985	27.6131	1.31174	0.00541288	0.0445825
ENSMMUG00000013741	7.77022	1.73009	0.00543338	0.0445825
PLA2G7	230.529	1.94375	0.00543047	0.0445825
ENSMMUG00000012273	66.4614	2.25304	0.00540722	0.0445825
ANKRD22	12.248	2.69873	0.00543216	0.0445825
ZNF506	1613.58	-0.315291	0.00544942	0.0446895
ENSMMUG00000060689	85.738	-1.18376	0.00546243	0.0447221
ENSMMUG00000006397	556.225	0.402652	0.00546006	0.0447221
SLC1A2	8.69821	1.8303	0.00545832	0.0447221
URB1	237.927	-0.470775	0.0054853	0.0448847
PGAM1	2052.83	0.665766	0.00549206	0.0449152
GABARAPL1	2116.65	-0.510982	0.00550143	0.0449672
ZNF317	2214.15	-0.452467	0.00550967	0.0450097
GRAMD4	667.923	-0.403248	0.0055371	0.0452088
PXMP4	296.366	0.458933	0.00554012	0.0452088
SCAI	43.7167	-0.637042	0.00557538	0.045424
SAP30L	283.094	-0.402239	0.0055781	0.045424
MYH10	130.715	0.535614	0.0055787	0.045424
ADAM8	799.583	0.91014	0.00557639	0.045424
MKLN1	685.224	-0.335198	0.00558427	0.0454444
TBC1D10B	4490.89	-0.403764	0.00559843	0.0455347
SLC38A2	2563.43	-0.340765	0.00561227	0.0456223
HEATR4	64.6153	-0.653503	0.00564259	0.0458438
ZNF576	201.297	-0.520744	0.00565989	0.0459592
PAG1	1986.4	-0.523325	0.00566867	0.0460053
APBB1	1813.46	-0.646877	0.00568133	0.0460651
ENSMMUG00000063612	27.2314	1.17668	0.00568222	0.0460651
CYB5R1	293.865	0.854181	0.00571133	0.0462757
JAK1	10419.9	-0.357323	0.0057156	0.0462852
SERPINB8	411.656	0.966479	0.00572516	0.0463374
ZNF791	333.472	-0.597392	0.00574849	0.0465009
FEZ1	9.7106	-1.23219	0.00575671	0.046542
NSF	892.354	-0.362665	0.00580366	0.0466971
LAS1L	900.156	-0.243539	0.00578853	0.0466971
PGK1	5427.87	0.336803	0.0058073	0.0466971
TPI1	3533.91	0.484516	0.00578388	0.0466971
PPFIA4	52.5139	1.45649	0.00580129	0.0466971
SCN1B	280.003	1.68677	0.00580635	0.0466971
CAMP	544.355	1.82214	0.0057915	0.0466971
Y_RNA.595	4.21262	2.31685	0.00580542	0.0466971
EFHC1	9.74263	2.53547	0.00580553	0.0466971
KCTD14	14.8865	2.31954	0.00578977	0.0466971
SNORA71.1	15.6196	1.12387	0.00581112	0.0467026
MTA3	246.517	-0.51571	0.00581992	0.0467254
RRAS	362.342	1.34426	0.00582024	0.0467254
ENSMMUG00000058437	7.31042	2.14604	0.00583057	0.046783
ZNF684	86.9252	-0.503761	0.00584895	0.0468799
TRIM35	10.6553	1.77123	0.00584596	0.0468799
NICN1	433.83	0.404442	0.0058667	0.0469968
PLEKHO1	819.152	0.831002	0.00587227	0.0470161
TMTC4	252.614	0.438109	0.00591496	0.0473324
TXNDC12	1822.49	-0.383095	0.00592576	0.0473551
CALM3	2087.22	0.491325	0.00592517	0.0473551
SESTD1	115.038	1.68338	0.00592735	0.0473551
SMYD5	316.142	-0.380613	0.00595247	0.0475302
ZNF350	682.313	-0.358157	0.00597508	0.0476852
FAM171A2	9.75109	-1.25768	0.0059876	0.0477595
ZNF43	988.363	-0.401421	0.00599983	0.0478314
CSTB	933.253	0.936494	0.00601252	0.0479068
TSC1	559.862	-0.522761	0.00604693	0.048078
PHC3	1676.55	-0.450901	0.00604561	0.048078
TTI1	448.776	-0.259091	0.00604234	0.048078
TLN1	9101.55	0.580066	0.00604032	0.048078
PEPD	1213.81	0.671893	0.00605458	0.0481131
SPEF2	11.1638	-1.60557	0.00606327	0.0481564
PPWD1	237.266	-0.413968	0.00607809	0.0482225
LACTB	263.041	0.808737	0.00607593	0.0482225
ZNF726	4.94376	-2.0255	0.00608219	0.0482293
AMBRA1	830.887	-0.303362	0.00609183	0.04828
ATP6V1D	520.635	0.736193	0.00609729	0.0482975
UHMK1	3643.3	0.302653	0.00610702	0.0483231
CHCHD1	147.398	0.561947	0.00610613	0.0483231
ENSMMUG00000053624	15.9762	1.07964	0.0061518	0.0486516
MDK	159.928	-0.817541	0.00616031	0.048693
ANKRD46	202.592	-0.666889	0.00617194	0.0487527
TRAPPC11	203.167	-0.515143	0.0061752	0.0487527
ZNF143	372.897	-0.373309	0.0061777	0.0487527
ENSMMUG00000059770	19.9884	-1.96923	0.00618747	0.0487737
RAB27A	552.926	0.548674	0.00619021	0.0487737
MTURN	117.752	0.941255	0.00618369	0.0487737
ENSMMUG00000017400	1926.33	-0.449787	0.00619562	0.0487785
ENSMMUG00000055312	9.25667	1.40072	0.00619737	0.0487785
ATG3	1576.73	0.561804	0.00620689	0.0488276
VWA1	147.645	1.2921	0.00621109	0.0488348
CDC42BPG	84.6322	-1.0298	0.00621687	0.0488543
HBP1	2782.86	-0.414669	0.00623562	0.0489758
ACRBP	16.9344	2.27544	0.00624142	0.0489954
PAQR5	25.6537	2.75534	0.00624857	0.0490257
HEXIM1	682.749	-0.437376	0.00626285	0.0490929
CNNM4	747.1	-0.422637	0.00626816	0.0490929
PRDM10	348.106	-0.379022	0.00627035	0.0490929
BLVRA	546.71	0.961072	0.00626861	0.0490929
MPDU1	715.352	0.643767	0.00627616	0.0491126
CRYBG1	2313.27	0.568178	0.00627995	0.0491164
TTC17	1604.8	-0.18631	0.00629651	0.0492201
HDHD3	33.3034	1.27217	0.0063236	0.0493799
RASSF8	9.1961	2.08643	0.0063212	0.0493799
ZBTB11	1121.12	-0.393832	0.00633504	0.0494432
ZNF680	182.976	-0.659158	0.0063389	0.0494474
ENSMMUG00000059683	3.44202	-3.02112	0.00634685	0.0494834
LCP1	22493.7	0.752462	0.00637391	0.0496684
SLC26A8	8.89221	1.55926	0.00638261	0.0497102
FAM177A1	232.692	-0.336718	0.00638939	0.0497369
ENPP2	44.9952	1.74568	0.00640065	0.0497984
MCF2L	379.785	-0.717645	0.00641358	0.0498208
RELL1	1173.77	-0.64606	0.00641297	0.0498208
TNPO1	1022.43	-0.247917	0.00640764	0.0498208
TLE1	1822.64	-0.653147	0.00641947	0.0498406
RIPK4	122.785	-1.7437	0.00642698	0.0498613
DYNLL2	370.237	-0.368862	0.00642885	0.0498613
TOB1	6520.77	-0.769449	0.00646114	0.0500856
CXCL14	44.6986	2.29882	0.00647006	0.0501286
NEK9	1934.38	-0.322824	0.00648202	0.0501951
DDX10	367.829	-0.333095	0.0065127	0.0504065
FAM102A	2606.86	-0.709776	0.0065272	0.0504924
CTNND1	119.517	1.41475	0.00653223	0.050505
MRE11	187.909	-0.50041	0.00659122	0.0509347
CEP44	103.193	-0.528906	0.00661071	0.0510322
ZDHHC17	289.976	-0.424407	0.00660789	0.0510322
GADD45G	554.917	1.18124	0.00662037	0.0510802
ENPP4	33.2305	-1.12052	0.00663721	0.0511836
ADAM19	1013.85	0.858321	0.00666017	0.051334
TNK2	480.528	0.352432	0.00672265	0.0517888
STIM2	1257.16	-0.359563	0.00674087	0.0519022
AGO2	877.051	0.54571	0.00678811	0.0522389
ENSMMUG00000058747	6.28747	-2.03724	0.00679645	0.0522761
TADA1	464.557	-0.421701	0.00680837	0.0523407
ENSMMUG00000042330	4.42596	2.36435	0.00681899	0.0523952
SESN2	1010.59	1.23454	0.00685198	0.0526215
CITED4	131.181	1.16952	0.00686538	0.0526972
PTGES2	580.089	0.576293	0.00687676	0.0527573
TSNARE1	261.528	-0.459048	0.00688121	0.0527642
PSENEN	740.785	0.784214	0.00688936	0.0527995
CCP110	315.214	-0.467413	0.00690083	0.0528329
CADM1	29.7575	1.26429	0.00689781	0.0528329
DMTF1	1275.54	-0.409163	0.00692028	0.0529467
FABP5	226.956	1.09951	0.00692281	0.0529467
TRAPPC1.1	183.476	0.767553	0.00693202	0.0529899
TTC13	684.879	-0.368375	0.00693675	0.0529987
SF3B1	13044	-0.325091	0.00694107	0.0530045
RAD21	2479.73	-0.361626	0.00694891	0.0530371
DMAC2L	126.309	-0.645632	0.00698365	0.0532749
S100PBP	86.7355	-0.659716	0.0070175	0.0534783
TUBGCP5	173.937	-0.624528	0.00701566	0.0534783
BLOC1S4	766.332	-0.523841	0.00703112	0.0535547
GATA3	1361.47	-0.50423	0.00705464	0.0537063
BUB3	1322.71	-0.446212	0.00708044	0.0538751
ENSMMUG00000058404	162.267	0.664676	0.00708558	0.0538787
TRPM2	427.126	1.09548	0.00708816	0.0538787
TET2	1215.66	0.506748	0.00710396	0.0539712
MRTFB	274.931	-0.580505	0.00711503	0.0540278
ENSMMUG00000049295	1265.36	-0.501627	0.00712308	0.0540613
LAMB2	229.123	1.89316	0.00712919	0.05408
SYK	1814.65	1.22941	0.00714403	0.054165
APPL2	646.212	-0.412728	0.00715947	0.0542543
MIA3	1009.77	-0.346003	0.00716893	0.0542983
REEP3	450.153	0.795952	0.00719074	0.0544358
ATF4	4897.21	-0.359561	0.00721479	0.0545901
COG3	494.234	-0.396705	0.00722913	0.0546708
LMBR1	476.684	-0.436853	0.00725455	0.0547535
ELAC1	107.941	-0.431055	0.00726489	0.0547535
IP6K2	707.751	-0.378632	0.00726512	0.0547535
CIB1	4113.78	0.338882	0.00726559	0.0547535
KLF7	804.759	0.614274	0.00726561	0.0547535
ENSMMUG00000012203	960.638	0.634388	0.00725859	0.0547535
SYNGR2	3175.99	0.914087	0.00726585	0.0547535
ENSMMUG00000040287	205.06	-0.854901	0.00727524	0.0547687
TGFBR2	2346.83	-0.306593	0.00727473	0.0547687
WDR33	1242.73	-0.394063	0.00728595	0.0548216
KDM4C	1624.75	-0.286442	0.00729371	0.0548522
CASC4	1162.4	-0.32601	0.00730088	0.0548784
ARF5	2253.76	0.41744	0.00732893	0.0550058
TRABD	2068.39	0.450182	0.00732397	0.0550058
LPXN	859.328	0.511491	0.00732667	0.0550058
ROCK2	429.423	-0.527417	0.00733367	0.0550136
PTPN13	241.079	-0.71283	0.00734282	0.0550545
TRAPPC13	220.515	-0.56892	0.00735353	0.0550811
KAT7	2750.61	-0.38869	0.0073541	0.0550811
ATXN2	1199.67	-0.273791	0.00735867	0.0550811
TMBIM6	8252.86	0.652082	0.00736489	0.0550811
ENSMMUG00000052486	164.36	0.751169	0.00736381	0.0550811
ZBTB25	81.1951	-0.609586	0.00737533	0.0551118
GYG1	290.102	0.884748	0.00737641	0.0551118
DCAF1	783.828	-0.258256	0.00738796	0.0551548
BAZ2B	304.577	0.920499	0.00738958	0.0551548
RAB11FIP1	650.606	0.638384	0.00740996	0.0552791
AMIGO1	41.5729	-0.651749	0.00741505	0.0552863
SEMA4D	7928.66	-0.539745	0.00741836	0.0552863
MAPKAPK2	162.799	0.53096	0.00743869	0.0553823
ENSMMUG00000047939	13.6816	1.92975	0.00743672	0.0553823
ENSMMUG00000060233	16.998	1.76318	0.00744552	0.0554054
LAMP1	5412.33	0.874117	0.00751857	0.055921
[truncated: 33,442 more rows]

## Sheet: day 294 p.i.
gene_id	baseMean (mean of normalized counts for All samples)	log2FoldChange (log2 fold change (MLE): VA/A)	pvalue (Wald test p-value: VA/A)	padj (BH adjusted p-values: VA/A)
TRBV11.1	56.5472	-3.48315	2.94013e-15	4.3167e-11
ENSMMUG00000059770	21.8626	-2.78391	6.62585e-06	0.0486403
SDK2	29.199	3.16616	1.20013e-05	0.0587343
ZNF541	126.724	-1.7201	2.66128e-05	0.0976824
IGFBP2	13.2116	2.62212	8.73788e-05	0.218652
ENSMMUG00000065174	64.3893	2.26923	8.9355e-05	0.218652
ZNF808	317.681	-0.783658	0.000209598	0.368998
B4GALT1	1481.81	0.409211	0.000259498	0.368998
KIR3DL12	27.9236	2.00098	0.000276459	0.368998
ENSMMUG00000053517	34.7038	2.8192	0.000208073	0.368998
LRRC32	54.1367	1.3438	0.000262005	0.368998
PHLPP2	148.283	0.769724	0.000348309	0.393375
NADK2	166.642	0.858428	0.000344224	0.393375
ENSMMUG00000057035	21.5812	1.87876	0.000412007	0.403272
ENSMMUG00000054922	207.653	-0.720736	0.000389991	0.403272
ENSMMUG00000050761	365.212	5.03651	0.00057214	0.52501
ENSMMUG00000047632	145.138	4.14032	0.000642198	0.554632
ZNF699	108.481	-0.795781	0.000807257	0.592607
PPP1R37	450.293	-0.400817	0.00080161	0.592607
ENSMMUG00000052486	197.763	0.759184	0.000774677	0.592607
SUSD2	18.5696	1.52964	0.000880078	0.604049
ENSMMUG00000006778	840.822	-0.550857	0.000905128	0.604049
FNDC10	26.3435	1.35144	0.00122925	0.784687
GPATCH2L	205.722	-0.624603	0.00140786	0.861257
CFAP36	342.599	0.37928	0.00165872	0.947942
SGMS1	668.516	-0.55973	0.00167869	0.947942
ENSMMUG00000059649	299.189	-0.660082	0.00520028	1
STMN3	3323.07	-0.817118	0.00379797	1
LDOC1	84.9391	-0.44057	0.166547	1
CACNA2D2	51.3576	-1.40169	0.0884851	1
VWA1	165.912	1.22244	0.00564255	1
UBE2M	351.076	0.653023	0.00214627	1
GCC1	1345.3	-0.268592	0.0532992	1
IL4R	12863.3	-0.196429	0.108302	1
ENSMMUG00000065261	207.742	0.754144	0.0215826	1
CGA	480.731	-1.43231	0.00870711	1
LDB2	30.7631	1.58355	0.00804939	1
ENSMMUG00000051530	32.1833	-0.188098	0.802866	1
ENSMMUG00000009038	29.5746	1.90679	0.0114075	1
PRDM1	425.346	-0.339044	0.135899	1
CRTC1	274.326	-0.280377	0.0894179	1
ENSMMUG00000060794	25.2287	1.73428	0.00337942	1
ENSMMUG00000055627	331.541	0.559048	0.00915137	1
SSPO	11.5342	2.56889	0.00782643	1
LMNTD2	97.5558	-0.395144	0.154991	1
ENSMMUG00000060741	50.6275	1.10533	0.0364253	1
PTPRK	16.611	1.62556	0.0170157	1
BRK1	1671.51	0.356108	0.00399146	1
ENSMMUG00000006206	596.734	0.819535	0.00755838	1
EXOC3L1	2.71248	4.31369	0.00248351	1
MRPL15	195.778	0.456991	0.0325467	1
IL21R	722.023	-0.482323	0.00236672	1
SLC8B1	1975.87	-0.237657	0.0527638	1
ENSMMUG00000058747	11.4826	-1.98087	0.00266142	1
POLI	240.958	0.544561	0.00414411	1
GCK	10.0451	2.26822	0.00290033	1
ENSMMUG00000052673	112.834	0.885662	0.0508621	1
ARF6	4382.88	-0.147426	0.615036	1
VPS9D1	379.307	-0.31234	0.189633	1
ENSMMUG00000063032	2.44072	4.16014	0.00819735	1
PGRMC1	409.656	0.466283	0.0101024	1
AKAP17A	9311.2	-0.215076	0.0716572	1
NELFA	692.933	-0.236979	0.0398553	1
GPT2	139.722	0.803142	0.0507945	1
ENSMMUG00000051066	15.8617	-1.03579	0.540384	1
OSR2	251.594	0.186722	0.778452	1
NHSL2	236.049	0.20587	0.732137	1
NTNG2	225.301	0.0136221	0.978916	1
RGS9	397.241	0.0683267	0.903936	1
KRTAP16.1	111.852	-0.993483	0.516366	1
ENSMMUG00000056722	341.446	-0.110338	0.678921	1
CMA1	167.402	0.916947	0.144094	1
SSBP4	2412.91	0.0163053	0.916595	1
ENSMMUG00000002075	370.008	0.142975	0.844337	1
MMP21	8.23917	0.34779	0.68545	1
PDCD1	983.339	0.40432	0.146967	1
PGBD1	112.071	0.574537	0.15582	1
ADAMTSL5	60.4967	0.294786	0.533157	1
EXD3	261.355	0.0547354	0.827635	1
ENSMMUG00000040033	21.6031	-0.445348	0.573717	1
MCOLN2	110.695	0.428038	0.249049	1
POLE2	33.1802	-0.264553	0.578558	1
HBEGF	234.336	0.0193155	0.959915	1
TIAM2	35.0651	1.16376	0.111067	1
ADAM15	1523.64	0.161983	0.476184	1
FGFBP2	44.1757	0.268848	0.639215	1
S1PR5	155.799	0.200691	0.773517	1
ADCY9	163.722	0.0591986	0.784709	1
ENSMMUG00000055722	48.0226	0.623848	0.279776	1
NKG2D	66.7166	0.241329	0.631365	1
ENSMMUG00000008111	220.805	0.0712518	0.903216	1
MAMDC4	92.6411	-0.0636547	0.928589	1
WDR25	340.395	0.00739184	0.97076	1
ITGA2B	132.803	-0.658122	0.0753255	1
KLRD1	151.216	0.55263	0.481255	1
CST7	281.453	0.0762073	0.81231	1
ARRDC2	5027.28	0.181445	0.195212	1
VOPP1	1903.17	0.252299	0.320194	1
UNC5B	85.1585	0.142154	0.757552	1
CHMP2B	694.806	0.132965	0.443884	1
FOXK1	1118.18	-0.0563987	0.742194	1
ENSMMUG00000003289	50.0887	-0.612706	0.194188	1
MAD2L1	162.193	-0.15804	0.503529	1
HSD11B1	5.4053	0.578491	0.537219	1
PPP1R3D	104.384	-0.130276	0.664898	1
MOB3C	241.916	0.0290121	0.891888	1
NPEPL1	1418.68	0.014103	0.927798	1
FSCN1	81.8662	0.459398	0.249264	1
GOLIM4	498.508	0.682995	0.0499335	1
ENSMMUG00000061249	542.393	-0.121331	0.679815	1
MOXD1	16.1077	1.17009	0.139387	1
MOB2	3806.36	-0.00772549	0.944885	1
CNTROB	668.643	0.157917	0.457704	1
ABCA2	1374.26	0.0855575	0.630024	1
MYLK	9.27078	-0.221134	0.802094	1
ENSMMUG00000055768	8.8002	0.301821	0.761265	1
ISL2	39.8419	-0.00739608	0.988357	1
TBX21	351.162	0.32079	0.252365	1
TGFBR3	1898.76	0.425203	0.284716	1
CTTN	68.7927	-0.175856	0.715256	1
PEX10	324.526	-0.0577862	0.768632	1
RPS6KL1	136.38	-0.0744978	0.904775	1
NCALD	213.01	-0.31959	0.233584	1
SH2D2A	620.259	0.0326921	0.859038	1
ENSMMUG00000054077	391.613	-0.288689	0.331656	1
GABPA	302.463	-0.0881601	0.609111	1
CDK14	42.2963	-0.089663	0.826475	1
GMCL1	476.651	0.112097	0.482039	1
ENSMMUG00000061521	4073.37	0.12385	0.578651	1
SEMA3G	62.8504	0.366329	0.457417	1
ALPK2	16.4492	0.131645	0.825339	1
MAST4	183.001	0.0257075	0.934663	1
CCDC127	142.237	0.138969	0.494242	1
ZNF777	863.208	0.0203202	0.895072	1
ZNF512B	354.979	-0.0488653	0.762175	1
FRMD4B	1002.23	-0.050161	0.844263	1
ENSMMUG00000063198	1419.37	0.112125	0.699029	1
TNFRSF10B	193.267	-0.029906	0.927522	1
GLCCI1	1533.8	0.332704	0.0267908	1
COPG1	2137.82	0.325546	0.0921672	1
ADCY10	19.4112	-0.748607	0.218065	1
TGFB1	9603.04	0.223856	0.172616	1
SCNN1A	113.425	0.363505	0.329775	1
AFAP1L2	69.8493	0.499329	0.343295	1
SGSH	1092.01	0.197164	0.410305	1
PGM5	25.1908	0.582367	0.424743	1
SNX16	147.498	-0.209648	0.434152	1
ENSMMUG00000005113	91.5089	0.241436	0.444614	1
CANT1	464.94	0.110252	0.468926	1
MPIG6B	114.259	-0.229992	0.496245	1
TIGD7	70.9659	-0.263404	0.525953	1
PSKH1	1974.48	-0.0795324	0.560229	1
RDX	147.349	-0.107596	0.628761	1
ATP6V1A	368.777	-0.0821206	0.629111	1
ORC2	243.443	-0.0959505	0.633647	1
STRN4	2674.13	-0.0635671	0.6414	1
MIEF2	700.4	-0.0609874	0.684816	1
IER5	1625.99	0.0855149	0.684878	1
COX7A1	191.983	-0.0727141	0.730485	1
SLC26A1	15.9644	0.196403	0.744915	1
ENSMMUG00000051366	4.49963	0.329689	0.78021	1
SLC9A3R2	33.7434	0.150118	0.811716	1
GEMIN4	862.178	-0.0224041	0.888593	1
ETV7	79.0552	0.00558565	0.990037	1
ITGA1	659.692	-0.744867	0.0277556	1
FUT11	305.019	0.484152	0.0713589	1
ANKRD46	445.508	-0.0435364	0.80891	1
THAP4	1110.05	0.254757	0.0912303	1
SNX22	123.371	-0.415386	0.292692	1
ENSMMUG00000012125	22.0635	0.408886	0.604822	1
KLHL26	378.375	0.000645904	0.997412	1
PHC2	1848.67	0.172478	0.21813	1
TRIM58	13.9576	-0.568734	0.418845	1
SLC37A1	566.126	-0.0400359	0.824356	1
NSG1	244.406	0.600817	0.0613352	1
ENSMMUG00000061332	16.1384	-0.510091	0.354232	1
CDK6	306.125	0.472986	0.0519171	1
NDRG4	9.18931	-1.07066	0.180272	1
GAPDH	25008.6	0.228345	0.119185	1
TLN2	25.4715	0.816352	0.121046	1
PLA2G10	5.59938	1.18566	0.220137	1
MT1X	18.9285	0.593998	0.231646	1
FKBP8	4378.36	0.143976	0.246139	1
ENSMMUG00000049888	21.4099	-0.483013	0.247924	1
TNRC18	801.076	0.284747	0.297158	1
ENSMMUG00000057970	211.737	0.257447	0.303936	1
WASHC4	2025.49	-0.118827	0.410788	1
ZNF559	739.094	-0.128957	0.414037	1
SCARF1	25.8006	-0.327095	0.438203	1
NKG7	1900.08	0.438174	0.457564	1
ENSMMUG00000003076	32.8156	-0.381773	0.510423	1
MPZL1	388.504	-0.100302	0.559559	1
IPO7	380.063	-0.0941155	0.559741	1
ENSMMUG00000022610	2854.06	-0.0790917	0.561302	1
ERI2	82.6208	0.144427	0.591286	1
GDE1	901.56	0.0823659	0.605067	1
ETFRF1	316.243	-0.169381	0.611785	1
UPB1	13.2774	0.334067	0.612278	1
RABGGTA	867.814	-0.0687801	0.635786	1
ZFYVE16	332.172	-0.102071	0.648087	1
MRE11	241.719	-0.067991	0.686632	1
GAMT	381.284	0.0728496	0.703077	1
U1.20	3.8559	0.424992	0.712416	1
RHBDD2	2471.77	0.0597971	0.748235	1
HOPX	857.247	0.0972669	0.759435	1
ARL6IP4	1205.67	0.0428478	0.774463	1
ENSMMUG00000014648	192.71	-0.104298	0.781202	1
SMKR1	20.3718	0.157069	0.793222	1
MFSD5	1028	0.0283088	0.827702	1
MYO1G	12530.6	0.0304408	0.858453	1
NFIL3	1947.63	-0.0332589	0.858617	1
RB1	1009.11	-0.0301576	0.865931	1
CCDC97	1067.19	-0.0224959	0.868339	1
ENSMMUG00000060325	481.501	-0.0154777	0.914861	1
GMIP	2368.65	0.0135174	0.928586	1
PTK7	112.158	-0.0416933	0.931796	1
CSE1L	1091.33	-0.00970842	0.953474	1
P4HA2	4.85805	0.0443661	0.966188	1
ENSMMUG00000013585	150.445	-0.0129862	0.975079	1
ZBED6CL	303.457	-0.173226	0.479683	1
ENSMMUG00000050693	127.061	0.217874	0.334343	1
SYNJ2BP	342.391	-0.00442742	0.982902	1
ENSMMUG00000061109	52.1577	-0.167414	0.613022	1
ELOVL4	129.391	-0.0757216	0.849969	1
TMEM117	75.04	-0.588097	0.0813981	1
C1H1orf159	761.621	-0.205099	0.19158	1
CEP57L1	185.565	-0.352146	0.344738	1
SEPTIN8	118.273	-0.182054	0.467759	1
ENSMMUG00000049939	38.3214	-0.276135	0.481676	1
ABHD3	851.829	0.0904257	0.584743	1
RNF126	1552.05	-0.0594017	0.648767	1
KCP	33.739	0.18615	0.748715	1
VPS13C	611.584	0.0510683	0.823645	1
CTNND1	77.6045	-0.312235	0.329775	1
ITGB5	32.3724	-0.343222	0.494674	1
FAM71B	4.67642	0.224594	0.832624	1
ENSMMUG00000053333	52.5971	-0.0258021	0.976569	1
DLL4	4.95721	1.69279	0.12676	1
FAM193B	627.668	-0.127489	0.511228	1
CASTOR2	57.5924	0.0520652	0.869938	1
LMBRD1	572.617	0.068438	0.62298	1
TTC39B	94.4252	0.134487	0.647715	1
LIN7C	749.077	-0.0209458	0.898375	1
CDCA4	362.924	-0.0047909	0.983143	1
SLC7A5	2520.71	0.0481935	0.839914	1
SPNS2	4.87224	0.607069	0.536143	1
ENSMMUG00000008396	300.216	-0.0585137	0.754992	1
PIK3R2	999.169	0.0328021	0.841007	1
CLIC4	348.74	0.0144073	0.954534	1
CCDC187	6.19725	1.19851	0.243223	1
NUP62	1666.15	0.126697	0.440104	1
ENSMMUG00000058114	6.03201	0.440488	0.681619	1
KLRF1	56.4711	0.765529	0.14328	1
AAR2	1655.82	-0.0450236	0.778278	1
MEGF11	19.8699	0.791101	0.28242	1
C11H12orf57	2249.25	-0.0557286	0.811116	1
SLC39A13	2875.81	-0.0254854	0.844555	1
D2HGDH	1128.2	-0.0200201	0.907686	1
MROH1	1084.17	0.314217	0.167156	1
ENSMMUG00000062897	134.788	0.310173	0.305749	1
ZBED1	2730.85	0.0913638	0.52578	1
GNG11	145.953	0.107629	0.681737	1
OSBPL7	1033.53	0.0260033	0.884115	1
ENSMMUG00000040845	53.564	0.12072	0.900221	1
ROR2	50.4727	-0.723416	0.200389	1
NAP1L2	40.1993	-0.441523	0.282305	1
ENSMMUG00000062946	542.872	-0.104817	0.741626	1
ENSMMUG00000006855	276.192	0.0446095	0.897096	1
ENSMMUG00000014862	30.9868	0.116099	0.788796	1
PLEKHN1	51.2932	0.88991	0.110356	1
TSPAN2	217.594	0.387966	0.262815	1
NUAK1	8.23966	1.00899	0.272678	1
NTN4	83.4594	0.372571	0.384735	1
ENSMMUG00000057434	267.785	-0.17222	0.392367	1
ENSMMUG00000062930	496.862	-0.104858	0.58591	1
PPP2R2B	70.7338	0.199378	0.640644	1
DCUN1D1	911.134	-0.0550143	0.700987	1
DHRS3	1339.51	-0.0702507	0.751357	1
CTDP1	489.329	0.0730343	0.791158	1
ADRB2	532.393	0.0215349	0.942742	1
RMDN1	346.206	0.00383928	0.981235	1
ENSMMUG00000064792	4.92392	0.00564861	0.99579	1
CCDC82	1398.48	-0.106688	0.546397	1
ENSMMUG00000056166	22.6696	0.660267	0.22663	1
FBXO27	368.067	0.408624	0.41094	1
PPBP	272.505	0.283482	0.568372	1
NGRN	2247.99	0.0562326	0.664183	1
ENSMMUG00000058083	11.8064	-0.219709	0.685558	1
CA1	28.2448	0.426275	0.703908	1
PCED1B	7589.98	-0.0282977	0.855906	1
TSNARE1	447.498	0.0202744	0.905806	1
RAP1GAP2	570.702	0.00445444	0.987226	1
PFDN4	185.818	-0.139699	0.598978	1
HNRNPUL1	8479.03	0.143548	0.274654	1
ZNF408	1437.94	-0.0569761	0.674052	1
REV1	848.206	-0.113425	0.444865	1
TCEAL9	11.4194	-0.187434	0.793844	1
YIPF5	722.869	-0.0330996	0.883276	1
BMP1	52.4239	-1.49896	0.0181496	1
ENSMMUG00000058586	24.5221	0.259525	0.607419	1
TRIM11	684.01	-0.00983384	0.953799	1
SRM	2012.72	0.270121	0.0765719	1
ENSMMUG00000043638	8.2689	-1.02856	0.148965	1
MALT1	1489.95	-0.188951	0.192312	1
PPM1M	2973.08	0.303791	0.231861	1
ZNF136	141.994	-0.23554	0.307182	1
SETD6	30.0153	-0.284041	0.488265	1
HPS6	1238.71	0.073648	0.576188	1
HDAC4	648.828	-0.0789064	0.635684	1
ARID3B	478.723	0.0887564	0.653473	1
TERF2IP	2035.29	0.0659922	0.656381	1
GPR141	149.492	0.225766	0.714643	1
PIKFYVE	594.232	-0.0568451	0.756377	1
SLC30A7	449.029	-0.0557305	0.772424	1
DAGLA	11.0031	0.131764	0.822109	1
TSPAN17	509.375	0.023477	0.924742	1
UTP18	759.365	0.00758117	0.952481	1
ADGRG1	275.424	-0.0363894	0.955079	1
ENSMMUG00000050820	5.5232	0.0161805	0.988061	1
ENSMMUG00000054099	11.8277	-0.0109165	0.988373	1
PCBP4	516.507	0.272878	0.0945186	1
ZNF200	83.4553	-0.309022	0.178461	1
MYO10	8.77746	1.08103	0.237295	1
EMB	424.247	0.214651	0.25447	1
CDC37	3631.56	0.0906608	0.401512	1
B3GALT6	329.272	0.13656	0.4404	1
MARCHF2	1519.98	0.116325	0.455112	1
MTRF1	170.52	-0.129033	0.506917	1
ENSMMUG00000038355	44.0853	0.234206	0.635186	1
NEIL3	7.18243	0.395721	0.644909	1
PKN1	10121.5	-0.0451049	0.752473	1
MYO1D	112.975	0.0618887	0.861996	1
SLURP2	358.029	-0.0308692	0.922584	1
ENSMMUG00000028844	38.0831	0.0454107	0.941844	1
TRBV19	321.815	0.37279	0.143167	1
GFI1	277.384	-0.272157	0.410677	1
ENSMMUG00000059233	304.701	0.138767	0.566129	1
PBRM1	1493.4	-0.0612987	0.628391	1
ENSMMUG00000049722	74.0437	-0.0964507	0.806889	1
PLA1A	11.1238	0.114306	0.854444	1
CPT1B	104.916	-0.0488628	0.864219	1
RGS16	759.523	0.00216543	0.993734	1
MAP1S	1016.53	-0.0688763	0.618767	1
ENSMMUG00000053423	9.45095	0.325958	0.646718	1
ENSMMUG00000059569	892.499	0.103372	0.727953	1
ZNF558	92.8763	-0.0541212	0.843585	1
RPS27A	122.353	-0.0640416	0.865369	1
MOAP1	2612.58	0.000522361	0.998545	1
MYB	215.685	0.573013	0.289807	1
ORAI1	6751.49	0.112647	0.406508	1
GPR155	459.822	-0.233444	0.357528	1
MUL1	787.756	0.14417	0.359653	1
PRSS56	67.2807	-0.197875	0.655499	1
PRR5	1223.95	-0.0261183	0.916456	1
NAA15	1273.97	0.0151457	0.936751	1
RAB37	651.914	-0.0891792	0.761336	1
ENSMMUG00000049639	5.12318	0.23494	0.80229	1
PROM2	37.1353	-0.0775518	0.877623	1
HAUS1	283.887	0.254452	0.135272	1
TRBV9	198.031	-0.381852	0.153072	1
mml.mir.135a.1	4.48772	0.859705	0.412837	1
FZD10	64.9041	0.413358	0.457986	1
TRAV17	87.7806	0.574901	0.129354	1
DNAJC22	6.05212	1.16242	0.204848	1
TNFSF9	190.921	0.31495	0.209007	1
ENSMMUG00000029973	35.3323	-0.636966	0.209366	1
E2F7	13.7989	0.386688	0.512326	1
RGS18	88.9904	-0.199222	0.590335	1
SERPINE1	122.611	0.0591009	0.892133	1
BABAM1	1309.62	0.191012	0.177578	1
STAT4	819.999	0.2766	0.20902	1
GUCY2C	16.608	0.627854	0.21398	1
GTPBP3	108.415	-0.302204	0.464596	1
MYRF	205.337	-0.257395	0.476499	1
SLC25A6	9216.3	0.0884811	0.512743	1
USP9Y	1090.75	-0.111261	0.583915	1
ZNF3	402.571	-0.0625711	0.737624	1
MCTS1	255.617	0.0491405	0.806304	1
ENSMMUG00000059692	113.168	0.0882883	0.886674	1
PSMC3IP	54.7348	-0.0101489	0.971458	1
TMCO3	848.938	0.376235	0.0841912	1
CEP135	278.024	-0.132475	0.494431	1
SLC25A45	284.341	0.0188479	0.91474	1
ENSMMUG00000049787	7.00608	0.0833884	0.931188	1
APH1B	356.953	-0.148405	0.501619	1
ENSMMUG00000060589	6.93973	1.2638	0.127039	1
ENSMMUG00000055356	25.6842	-0.824154	0.104414	1
ERLIN2	277.454	-0.151961	0.537009	1
ENSMMUG00000059272	77.0656	0.189498	0.596956	1
KIF26B	74.8615	0.0993923	0.806338	1
LBR	3129.51	0.0107352	0.940007	1
MSL2	384.683	0.349199	0.282657	1
CEBPB	533.919	-0.110034	0.618368	1
C3	25.1662	-1.46848	0.0085849	1
ENSMMUG00000057484	19.6978	1.12486	0.0904364	1
FAM3C	165.373	0.423806	0.12114	1
CMTM7	1544.92	0.158761	0.244277	1
PRF1	889.483	0.692838	0.256776	1
SCFD1	571.541	0.160107	0.264048	1
PKP4	5.00895	1.27721	0.268858	1
CD2BP2	659.451	-0.163976	0.322512	1
LHFPL6	144.256	-0.661756	0.350089	1
NUMB	1478.35	0.135738	0.358361	1
ACTC1	2.53114	-1.14534	0.380723	1
ENSMMUG00000063515	4.85352	-0.939408	0.388239	1
WDR63	39.2782	0.450501	0.391243	1
RITA1	538.803	-0.157782	0.41513	1
ENSMMUG00000060789	23.4518	-0.452854	0.435287	1
JUN	15013.6	-0.147096	0.447228	1
ENSMMUG00000053459	317.982	0.13782	0.450339	1
FGD4	23.7954	0.324147	0.495314	1
ZFAND1	424.232	0.157239	0.514104	1
LPAR2	963.205	0.119465	0.515213	1
ENSMMUG00000041517	8.00421	-0.537571	0.51771	1
ENSMMUG00000063845	84.4502	-0.434325	0.518547	1
MISP3	48.2052	-0.247951	0.539983	1
ST6GALNAC2	53.6279	-0.189537	0.572049	1
TBL1XR1	284.528	0.129338	0.599562	1
RBM38	5258.62	-0.116576	0.604938	1
ARSG	357.091	0.232192	0.621393	1
NBEAL1	253.053	0.139518	0.694465	1
TRDMT1	420.225	-0.0577903	0.710724	1
U6.762	3.37856	-0.311789	0.755925	1
CASP6	130.474	-0.0596531	0.756096	1
PYCR1	201.408	0.056842	0.804912	1
NRGN	84.1786	-0.0810005	0.843373	1
CLEC9A	37.0332	0.0983117	0.869322	1
SCN2A	10.0163	0.109426	0.878471	1
FZR1	1662.46	-0.0202443	0.886152	1
CUX2	13.3614	-0.086162	0.897481	1
ZFYVE28	55.4003	0.0446175	0.904924	1
TIPIN	45.6961	0.0387725	0.906899	1
CTSL	1839.64	0.0265922	0.913953	1
XKR9	3.69414	0.0750497	0.93309	1
XKR8	465.183	0.0052446	0.975102	1
CEP85	4570.27	0.240009	0.147565	1
SMURF2	573.376	-0.1305	0.370948	1
ITGA6	5459.77	-0.117264	0.457741	1
PARP11	39.2849	-0.234542	0.508317	1
ENSMMUG00000065049	9.22912	-0.393069	0.527539	1
ENSMMUG00000064531	770.695	-0.0490024	0.806359	1
ABCA3	146.796	0.0582471	0.837031	1
INF2	306.354	-0.030892	0.854404	1
IFNG	80.0343	0.0358405	0.927882	1
LRRC8C	3359.92	0.0138759	0.932007	1
ENSMMUG00000058726	25.3872	0.00595654	0.992359	1
SLC25A32	518.673	0.0798292	0.611608	1
ELK4	168.989	0.0446587	0.80134	1
SRP9	798.638	-0.0274082	0.89	1
SHPRH	361.214	-0.280926	0.166141	1
POLG2	94.7971	-0.120065	0.659037	1
ACAP3	2405.37	-0.0872742	0.670742	1
TRBV7.2	637.799	-0.0215663	0.944736	1
U2.106	20.7908	-1.38348	0.0138738	1
TRIM8	2242.3	0.0508703	0.626324	1
WNT7A	2.82267	-0.297577	0.811898	1
SMIM1	110.44	-0.0336589	0.916293	1
RABAC1	2321.53	0.295479	0.00494045	1
ZC3H4	94.0398	-0.563591	0.00718764	1
ENSMMUG00000044916	25.371	1.56418	0.00405686	1
ZNF154	299.59	-0.417198	0.00741228	1
SLC33A1	280.32	-0.405749	0.00894886	1
OCA2	88.1075	-0.980748	0.0312542	1
ADCK1	360.246	0.566659	0.00232545	1
HLTF	292.823	-0.40003	0.0329847	1
ND1	165.832	-1.02854	0.0606844	1
ENSMMUG00000019688	38.7323	1.94204	0.00268098	1
ATP5F1D	1815.69	0.270206	0.017148	1
PTPRH	6.1292	-2.24904	0.0304486	1
COG2	792.697	0.254863	0.0403315	1
ENSMMUG00000046437	31.1753	-1.21184	0.00335078	1
TBC1D24	1601.14	0.267983	0.0148868	1
ENSMMUG00000060590	39.973	-1.32323	0.0169784	1
ZBED5	722.464	-0.313217	0.0178358	1
ENSMMUG00000004545	167.885	0.443422	0.0275878	1
ZNF701	232.671	-0.384099	0.0462232	1
YAE1	57.1531	-0.56687	0.0684196	1
KRI1	373.251	-0.410529	0.00291201	1
URB1	304.747	-0.474159	0.0165333	1
SLC50A1	1548.9	0.297335	0.0189541	1
SOCS2	914.217	1.12838	0.0394513	1
PLEKHA6	41.3387	-1.14607	0.00294547	1
THAP5	214.635	-0.420008	0.0299342	1
AP5Z1	1964.89	-0.530426	0.00231751	1
TWNK	388.285	-0.380274	0.00282663	1
ENSMMUG00000053122	6.31515	3.02262	0.00303262	1
KLHL3	208.876	-0.629855	0.00319755	1
RABL3	197.026	-0.522083	0.00331999	1
TAB2	2186.57	0.296304	0.00359011	1
ENSMMUG00000055375	29.0166	1.98424	0.00384863	1
PTGER4	12184.8	-0.408043	0.00393782	1
MIDEAS	951.945	-0.384622	0.0040821	1
RASSF8	18.6328	2.44738	0.00418341	1
ARHGEF16	53.4727	-1.02691	0.00433571	1
NUDT6	18.9661	1.65107	0.00436649	1
GPR107	1119.19	-0.375318	0.00454338	1
CHRNA7	17.594	1.97622	0.00458407	1
MYRIP	3.42943	3.91174	0.00470914	1
NEDD4	192.876	-0.429681	0.00497175	1
ABCC4	143.838	0.887523	0.00497714	1
FDFT1	2177.7	0.303744	0.00535898	1
ENSMMUG00000007939	485.497	0.865585	0.0056484	1
FRG1	358.115	0.487674	0.0061011	1
GZMK	282.549	0.80644	0.00643408	1
ENSMMUG00000055031	16.2055	2.22975	0.00643427	1
C2H3orf62	245.872	-0.449876	0.00654046	1
CXCL3	94.9302	-1.21216	0.00681173	1
SSR3	1095.71	0.294546	0.00730203	1
SLC35A2	426.07	-0.421897	0.0077207	1
FMO5	102.306	1.11969	0.00815216	1
TOLLIP	256.493	0.383381	0.0081872	1
RAD9B	6.77808	-1.68255	0.00834188	1
ENSMMUG00000049534	31.6905	1.92829	0.00852778	1
CEP89	147.2	0.541563	0.0085574	1
METTL7A	426.619	0.658005	0.00875166	1
CDH15	55.07	-1.09023	0.00890033	1
INA	50.7475	1.10571	0.0089567	1
CD1E	1.91344	3.84878	0.0093121	1
SLC35D2	563.398	0.356619	0.00932296	1
TKFC	218.028	-0.839044	0.00947581	1
TRMU	809.078	-0.45143	0.00952906	1
HELB	205.746	-0.565211	0.00963039	1
SC5D	313.995	0.678684	0.00979254	1
CCDC69	10306.5	0.386531	0.0098026	1
RGS2	859.36	0.853561	0.00992616	1
ZNF575	103.943	-0.622869	0.0100067	1
ENSMMUG00000063922	128.514	0.741498	0.0102407	1
RASGRF2	669.002	-0.434665	0.0104871	1
SAP25	148.877	-0.654502	0.0106534	1
SLX1A	436.516	-0.612804	0.010742	1
KHDC1	23.6768	1.23156	0.0107897	1
STX1A	80.5774	-0.643352	0.0109447	1
AP2A1	582.673	0.480231	0.0110262	1
ABLIM2	37.2726	0.788982	0.0110766	1
GSTZ1	121.136	-0.765846	0.0111091	1
ENSMMUG00000064369	50.9807	1.68135	0.0111859	1
ENSMMUG00000052841	34.9536	-0.905116	0.0112701	1
ENSMMUG00000051608	11.9178	1.42144	0.0113587	1
CFLAR	3038.9	-0.409847	0.0115787	1
GPR146	700.698	-0.707744	0.0116721	1
ENSMMUG00000018500	524.321	-0.648457	0.0118046	1
ENSMMUG00000057791	191.516	0.654661	0.0120464	1
ENSMMUG00000060990	14.713	-1.37408	0.0121344	1
SHC4	4.25274	3.46393	0.0122108	1
VPS37C	6.38581	2.49389	0.0124709	1
PHYH	415.827	0.441135	0.0124864	1
SLC23A1	9.80111	1.83896	0.0128742	1
ARL10	178.188	0.469298	0.0130028	1
RHOT2	4117.54	-0.4118	0.0130046	1
ENSMMUG00000058325	10204.4	1.20339	0.0130203	1
ENSMMUG00000056220	32.363	-0.788226	0.0131528	1
HINT2	532.187	0.311466	0.0135948	1
ENSMMUG00000065084	9.35294	-1.27578	0.0135967	1
GRM4	7.14884	2.12459	0.0138044	1
SUMO1	2143.54	0.326901	0.0140864	1
CYSTM1	259.736	0.431898	0.0142272	1
CDKN2B	36.5526	0.786511	0.0148315	1
LMAN2	4715	0.339175	0.0148885	1
NDUFAF3	1359.7	-0.627762	0.0150232	1
CTLA4	1264.91	-0.37478	0.0152838	1
SLC20A1	2842.96	-0.294416	0.0153862	1
NKIRAS1	108.41	-0.822104	0.0154648	1
TNN	11.2915	1.58602	0.0158046	1
RPL19	8466.71	0.367238	0.0159102	1
LRP5	763.785	-0.543214	0.0160372	1
GPR15	49.7905	0.780058	0.0161955	1
CLHC1	17.1973	-1.15017	0.016279	1
CXCR5	2572.89	0.58983	0.0167706	1
EMC7	1198.56	0.241653	0.01694	1
LYAR	497.908	0.415028	0.0169643	1
ZBTB9	67.4079	0.62829	0.0171535	1
SFI1	652.781	-0.3832	0.017764	1
ENSMMUG00000064959	5.25389	2.69433	0.018059	1
GALNT6	199.438	-0.614048	0.0180674	1
PRDX1	1507.66	0.329532	0.0182796	1
ENSMMUG00000030655	8.37707	2.23971	0.0185503	1
COX4I1	4290.1	0.255298	0.0186205	1
ENSMMUG00000020332	100.712	1.20277	0.0186819	1
NAPSA	17.7019	-1.5394	0.0187387	1
LIF	9.60967	-1.26954	0.0188712	1
RAMP1	76.945	1.08849	0.018923	1
KIF26A	6.13336	2.43574	0.0191021	1
ENSMMUG00000061244	225.382	-0.686797	0.0191809	1
TBL2	410.428	-0.422488	0.0192656	1
MICU3	25.8409	1.38544	0.0193649	1
METTL21A	640.829	0.372906	0.0195736	1
SNAPC2	278.865	0.316458	0.0198731	1
SNORD13	7.93889	-1.38017	0.0199442	1
TMEM108	17.3665	1.10896	0.0202353	1
CLDN4	29.4624	-1.0265	0.0203767	1
KLF15	18.5923	-0.904952	0.0204358	1
SMIM5	20.5924	-1.23332	0.0206612	1
ARL2BP	2614.05	0.265334	0.0210197	1
SLC26A4	7.13662	1.75274	0.0212078	1
SLC40A1	484.883	-0.594325	0.0216241	1
MAGIX	8.6751	1.56193	0.0217957	1
HTRA1	16.1174	2.05924	0.0221028	1
RPS6KA2	543.198	0.386171	0.0221198	1
DLGAP3	26.5948	0.87106	0.0221554	1
ENSMMUG00000061702	108.556	0.905804	0.0222978	1
ENSMMUG00000058002	6.66251	1.98747	0.0224617	1
ENSMMUG00000038067	71.1174	-0.65875	0.0225837	1
POLR1A	314.493	0.492194	0.022586	1
SP9	56.0068	0.799184	0.0229433	1
NOP10	1267.7	0.30578	0.0230344	1
ND5	28.0597	-1.06535	0.0231267	1
ADIRF	5.33031	-2.14229	0.0231622	1
TRAV8.6	367.657	0.553639	0.0234343	1
LPIN1	796.095	-0.449091	0.0240253	1
ENSMMUG00000056624	218.221	-0.31204	0.0243336	1
CCDC115	1121.05	0.291972	0.0244653	1
ENSMMUG00000053368	65.8871	-0.584074	0.0246843	1
PHPT1	698.771	0.289711	0.0250341	1
RASSF3	1527.46	0.588509	0.0251456	1
PIP5K1B	63.1221	0.77866	0.0252747	1
ENSMMUG00000061292	8.32395	-1.32754	0.0252789	1
GAPT	50.7851	1.17964	0.0253244	1
ENSMMUG00000055467	2.06385	3.15053	0.0254849	1
SYT14	18.2927	1.24265	0.0255306	1
ATXN7L3	848.799	0.278016	0.0255753	1
ENSMMUG00000059497	1071.06	-0.388989	0.0256008	1
TCTA	561.642	0.255549	0.0256159	1
FCN2	48.6109	-1.10365	0.0257958	1
FBXL4	577.181	-0.310532	0.0260141	1
DIP2C	1468.64	-0.41051	0.0261685	1
GET1	257.503	0.508067	0.0261768	1
DCHS2	11.4181	1.87307	0.0261998	1
PSMB2	1425.37	0.224243	0.0262087	1
SLC2A14	66.7259	-0.7752	0.0262258	1
NOTCH1	850.418	-0.330692	0.0262591	1
KCTD10	1075.33	0.480042	0.0262611	1
IGSF3	3.98698	2.75734	0.0263409	1
LAMA3	60.3311	0.883776	0.0265206	1
ENSMMUG00000047511	36.1231	-1.13998	0.026768	1
GEM	97.8242	0.770011	0.0268431	1
TNIP3	5.63308	-1.63338	0.0269516	1
PSMA6	1827.62	0.263021	0.0273629	1
C1H1orf198	53.8575	-0.820641	0.0273992	1
ZNF296	455.165	0.636035	0.027593	1
ENSMMUG00000060238	177.87	0.845006	0.0276854	1
EXO1	40.9027	0.695608	0.0278255	1
COL17A1	83.0039	0.581154	0.0279755	1
KLHL42	246.021	-0.325235	0.0282338	1
FBXL2	4.36711	2.5023	0.0284914	1
PDIA3	8167.18	0.167336	0.0285378	1
ENSMMUG00000003260	7.29817	-1.45569	0.0287358	1
PAQR4	272.2	0.478552	0.0287883	1
ENSMMUG00000061499	25.4057	-0.908004	0.0288646	1
MGMT	530.736	0.325424	0.0289452	1
TRIM25	1179.69	-0.253181	0.0290341	1
ENSMMUG00000049424	6.86056	-1.94434	0.0290783	1
INPP5F	441.698	-0.355979	0.0290802	1
MATN2	37.575	0.773539	0.0294888	1
PISD	1928.66	-0.308546	0.029739	1
GPR25	123.05	1.04096	0.0300648	1
Metazoa_SRP.1344	52.0275	-0.648634	0.0304218	1
CD96	716.524	0.547432	0.0305408	1
ENSMMUG00000032410	86.047	0.690744	0.0307347	1
FOXD2	25.5242	0.870007	0.0308049	1
TP53INP1	1066.85	-0.402299	0.0308126	1
SLC35A1	428.246	-0.303723	0.030815	1
CCR4	479.373	0.375621	0.0309412	1
ACSS2	198.923	-0.514357	0.0309839	1
ENSMMUG00000063505	6.99025	1.91379	0.0312335	1
C6H5orf34	204.858	-0.437329	0.0313555	1
ENSMMUG00000064606	2.77077	2.83135	0.0313817	1
SIT1	893.79	0.416709	0.0315402	1
SYTL2	888.719	0.568473	0.031717	1
OSBPL5	33.1118	1.18228	0.0318234	1
ENSMMUG00000060446	7.56962	2.1795	0.0319792	1
ENSMMUG00000060689	156.002	-0.755954	0.0323769	1
ITFG1	1410.5	0.223942	0.0324456	1
ZDHHC17	449.046	-0.275105	0.0325046	1
IFT43	91.8432	0.531252	0.0327546	1
ADAMTS10	868.812	-0.348368	0.0327633	1
LRP8	62.3167	0.540549	0.0328288	1
DTX4	13.6967	-1.35893	0.0328744	1
ENSMMUG00000062304	3.64286	-1.91553	0.0329507	1
ENSMMUG00000049442	22.4496	1.47493	0.0329706	1
CKLF	88.0271	-0.476973	0.0330413	1
FOXO1	3583.49	-0.273364	0.033143	1
PTPDC1	116.7	-0.46417	0.0332161	1
RBBP7	2179.74	0.193155	0.0332676	1
DNAJC8	1625.73	0.236233	0.0333665	1
DNMBP	624.959	-0.403051	0.033372	1
ENSMMUG00000052747	796.42	0.628107	0.0333933	1
SRD5A3	64.44	0.683044	0.0334022	1
EYA4	35.0186	0.844427	0.0335842	1
CERS5	1000.96	0.380683	0.0338597	1
ENSMMUG00000037703	250.848	0.447296	0.0340166	1
PATL2	57.27	-0.978213	0.0340398	1
C1H1orf100	3.06313	-2.09201	0.0341535	1
DBI	1893.37	0.314151	0.0342032	1
ENSMMUG00000058037	91.9904	0.512841	0.0342928	1
DPP4	3881.07	0.332361	0.0344513	1
FANCC	548.973	-0.348979	0.0344572	1
ENSMMUG00000015949	110.964	-0.458466	0.0345222	1
NRAS	912.788	0.342275	0.0346937	1
DOCK9	502.223	0.49501	0.0350319	1
NDUFB11	1798.36	0.265395	0.0351175	1
RHOF	3041.41	0.459671	0.0355373	1
TIGAR	2502.05	0.262776	0.0355673	1
FUT8	558.304	0.385411	0.0356052	1
CLUAP1	76.2152	0.464271	0.0356653	1
MTSS1	444.062	0.556799	0.0360879	1
ENSMMUG00000063013	6.95582	1.60188	0.0360943	1
ENSMMUG00000053541	32.09	-0.885753	0.0361045	1
H4C8	123.928	0.515589	0.0363305	1
C1R	5.7918	1.95856	0.0364693	1
SEC61B	902.98	0.288798	0.0368621	1
ENSMMUG00000021202	6.78473	1.70563	0.0370241	1
VPS35	574.447	0.582398	0.0370498	1
MTMR7	14.0773	-0.988714	0.0373888	1
IFT27	50.6648	0.811082	0.0373925	1
RALA	964.3	0.259355	0.037439	1
RHBDF1	132.439	-0.60956	0.0374857	1
EEF1A1	37813.6	0.237325	0.0375093	1
SELENOT	1986.88	0.243128	0.0376014	1
ENSMMUG00000010883	7.4745	1.45455	0.0376727	1
ENSMMUG00000065098	7.78166	1.57673	0.0383198	1
RP1L1	26.48	-1.17176	0.038367	1
CNTD2	18.9681	0.929919	0.0383999	1
ACSBG2	12.3103	-1.25519	0.0387704	1
MAP7D3	249.58	0.370258	0.038873	1
ENSMMUG00000049629	99.7723	-0.657209	0.0392248	1
IGLV3.9	13.8044	1.00322	0.0394656	1
KIR3DH	60.9929	1.10526	0.0394985	1
RNF19B	1375.97	0.367236	0.0395919	1
RPL28	2875.06	0.330842	0.0396489	1
DCTN2	1349.6	0.262051	0.0397727	1
POLD4	724.704	0.310832	0.0398648	1
OTOA	6.71286	1.69244	0.0399116	1
CYREN	109.337	-0.430173	0.0401934	1
TRIM22	4953.59	-0.220601	0.0403525	1
LSR	67.2128	-0.710484	0.0405132	1
MOSMO	40.5231	0.630543	0.0405857	1
ENSMMUG00000062728	2.03483	3.09979	0.0407743	1
ITK	11108	-0.330981	0.0408066	1
ZNHIT6	138.044	-0.399587	0.040954	1
ENSMMUG00000050829	14477.3	-0.501194	0.0409557	1
ENSMMUG00000055287	8.80892	-1.28647	0.0411313	1
RORC	120.74	0.898945	0.0411974	1
CFAP73	28.3297	-0.901654	0.0412584	1
BRCA2	20.051	-0.937359	0.0415276	1
MIGA2	702.465	-0.280488	0.0415594	1
LSM4	2228.08	0.225442	0.0416637	1
ZNF41	140.714	-0.399515	0.0419826	1
ANKRD24	64.6775	0.652314	0.0420441	1
ITGA3	21.2327	1.20405	0.0420809	1
TTLL7	37.2076	0.620348	0.0421971	1
ENSMMUG00000052585	66.8597	1.08574	0.0422335	1
TPM4	1667.11	0.343743	0.0422363	1
ENSMMUG00000039212	32.5977	0.807665	0.042239	1
S100A13	6.83467	1.85425	0.0422803	1
ENSMMUG00000031200	6.01002	-1.71928	0.0423976	1
Metazoa_SRP.2471	4.21007	-1.79247	0.0424021	1
CMTM6	3786.3	0.335153	0.0425402	1
CDKN3	50.8146	0.599377	0.0425519	1
ZNF473	474.63	-0.483183	0.0425989	1
CCR5	29.7241	0.995797	0.0426131	1
HSPA12B	275.504	0.308529	0.0426265	1
U8.13	31.6481	-0.693389	0.0426516	1
CORO6	1097.95	-0.431942	0.0427675	1
FAM136A	232.959	0.348278	0.0430254	1
Metazoa_SRP.1120	5.02841	-1.67866	0.0431312	1
ASF1B	403.445	0.344819	0.0431941	1
MET	15.6412	1.05752	0.0433386	1
SMCR8	923.158	-0.264521	0.0435197	1
U6.1203	5.39709	-1.38477	0.0437361	1
ST13	3027.24	0.236798	0.0437724	1
ENSMMUG00000043593	9.85009	2.19747	0.0439114	1
SNAP29	263.158	0.362057	0.0439235	1
ENSMMUG00000000249	1798.34	0.369507	0.0440126	1
ALCAM	430.342	0.434465	0.044076	1
RAB13	3.92316	2.29889	0.0442054	1
TMC6	5892.78	-0.318041	0.0445732	1
LPGAT1	448.36	0.378367	0.0446096	1
BCL3	660.137	-0.324561	0.0447474	1
ENSMMUG00000044103	399.55	0.289389	0.0448137	1
ARL5A	1159.78	0.251257	0.0448438	1
BLMH	544.117	0.263913	0.0449454	1
CDC42EP3	472.437	-0.275239	0.0451592	1
ENSMMUG00000061756	8943.93	-0.248372	0.0453361	1
B4GALNT3	12.8452	-1.15911	0.0453484	1
PARS2	57.9785	-0.957511	0.0455342	1
GNPTAB	452.489	0.559903	0.0455724	1
SERPINB2	126.88	-0.945657	0.0455856	1
ENSMMUG00000054798	9.03402	1.47107	0.0456917	1
ENSMMUG00000051278	57.9791	0.677006	0.0458855	1
ACOT7	1248.23	0.538911	0.0459348	1
CRIM1	190.63	-0.532217	0.0459678	1
CERS6	724.056	-0.294159	0.0461596	1
ZKSCAN7	18.9739	-0.798592	0.0461682	1
ENSMMUG00000060545	1714.93	-0.341993	0.046215	1
MON2	868.654	-0.268853	0.0463515	1
TTC23	77.2955	0.626586	0.0463863	1
MFAP3	288.906	-0.373231	0.0464632	1
FBLN2	116.524	0.745944	0.0465401	1
NPAS2	38.7596	0.701598	0.0465621	1
ENSMMUG00000012273	88.2469	1.91351	0.0466725	1
ENSMMUG00000064098	42.9611	-0.596403	0.0469603	1
LANCL3	49.3047	0.890442	0.0470335	1
ZNF462	18.3359	1.2191	0.0474942	1
CACNA1D	34.8409	0.670021	0.0475515	1
SORBS3	1078.8	-0.238366	0.0475825	1
ARPC3	4059.59	0.245974	0.0475884	1
JRKL	69.6592	-0.485115	0.0476005	1
CD81	6017.33	0.346188	0.0476575	1
ADAMTS17	267.853	0.726317	0.0478854	1
MSH6	1148.03	-0.219428	0.0481372	1
TPCN1	1753.5	-0.268844	0.0482791	1
SERTAD3	1131.64	0.290738	0.048609	1
RFLNB	2668.76	-0.27118	0.0487015	1
CASP12	1324.37	0.541593	0.0488545	1
JMJD4	492.564	-0.247673	0.048928	1
ENSMMUG00000052797	8.13387	1.70843	0.0489524	1
ENSMMUG00000040135	482.077	0.359593	0.0490675	1
ZNF501	32.54	0.764845	0.0491843	1
ENSMMUG00000056607	26.3585	1.05457	0.0492866	1
PNKD	349.379	0.287727	0.0494562	1
LOX	8.80968	1.64614	0.0495712	1
CNP	3413.91	-0.351419	0.049667	1
BLM	340.49	-0.266735	0.0496995	1
ENSMMUG00000058213	21.8999	1.30085	0.049728	1
SOGA1	68.9128	0.64914	0.0499097	1
PRDM15	265.619	-0.336395	0.0499588	1
B3GNT7	149.901	0.697503	0.0503029	1
RNASE4	1236.12	0.410352	0.0504417	1
MAPRE1	2138.91	0.257329	0.0505746	1
CHTF18	156.981	-0.431202	0.0507118	1
NAP1L1	1342.17	0.248875	0.0507626	1
SEC23B	737.283	0.317065	0.0507747	1
SLC35B4	137.14	0.430573	0.0507821	1
MAP3K8	841.236	0.491956	0.0508301	1
OSBPL11	1214.35	0.258038	0.0510452	1
DYNLRB1	1715.04	0.235353	0.0512078	1
GPER1	54.0334	-0.715137	0.0512394	1
ENSMMUG00000006443	121.331	-0.526801	0.0512543	1
RACK1	15092	0.204291	0.051574	1
CARS2	285.463	0.287529	0.0516146	1
SLC23A3	9.27261	1.23134	0.0518705	1
EIF4B	2991.57	0.194416	0.0518746	1
TLE1	2191.67	0.531918	0.0518838	1
TOM1L2	404.046	-0.301379	0.0519822	1
NBN	308.033	-0.294089	0.0520434	1
ZNF551	1107.99	-0.294312	0.052071	1
RBM15B	1280.72	0.216185	0.0521726	1
ENSMMUG00000051469	2.85724	2.83832	0.0523571	1
GLCE	464.769	-0.419155	0.0524875	1
ARF5	2687.66	0.223823	0.0525982	1
PPIP5K2	369.944	-0.247401	0.0526153	1
ENSMMUG00000045446	12.8117	1.04623	0.0526258	1
AP1S2	687.207	0.316678	0.0526406	1
JAG2	415.966	0.47075	0.0528156	1
DISP1	256.512	0.298908	0.0528684	1
OGFOD3	303.911	0.326309	0.0531178	1
NDUFAF2	98.313	0.419665	0.0531853	1
HDGFL3	11.0691	1.20871	0.0533106	1
NAA38	374.694	0.266036	0.0533217	1
ENSMMUG00000023296	8.3168	1.34535	0.0533541	1
CAPZB	6148.13	0.298071	0.0534081	1
SHMT1	274.611	-0.425683	0.0534323	1
BTG3	132.92	-0.371711	0.0538819	1
ENSMMUG00000053756	42.3003	-0.617291	0.053997	1
TDRD3	167.912	0.339182	0.0541052	1
TIPRL	216.365	0.386471	0.0541487	1
MIS12	892.766	0.240299	0.0541594	1
NDUFS6	487.114	0.258419	0.0542564	1
FLNB	1099.45	0.450302	0.0543727	1
AGPAT4	138.016	0.563295	0.0545772	1
EGLN3	2597.17	0.412453	0.0546947	1
ZNF181	223.888	-0.393852	0.0547259	1
CBX3	1749.87	0.206201	0.0547615	1
ENSMMUG00000052601	410.21	-0.482324	0.0547616	1
SURF2	505.666	0.2588	0.0549596	1
COX5A	1963.83	0.212062	0.0549903	1
ENSMMUG00000049510	30.646	0.672006	0.055067	1
KCNA6	4.16072	1.99845	0.0554141	1
ENSMMUG00000047203	23.8803	-1.21331	0.0554987	1
ENSMMUG00000049480	32.0269	0.839406	0.0556364	1
PLXNA3	898.977	-0.252593	0.0559419	1
LSM12	939.168	0.293757	0.0559453	1
ZNF410	771.381	0.243187	0.0559885	1
CD37	4202.71	0.285574	0.055995	1
ENSMMUG00000050342	5.64017	-1.79155	0.0563634	1
ATP8B1	8.06011	1.77828	0.0565348	1
ENSMMUG00000051511	42.1262	0.927802	0.0566	1
CALR	7480.25	0.239884	0.0568643	1
STAB2	8.93998	1.94684	0.0569596	1
EZR	17987.7	0.283317	0.0570301	1
MMP11	45.1056	-0.633333	0.0571288	1
TIFA	60.9868	-0.637404	0.0571882	1
BTBD6	3032.62	0.212361	0.0573061	1
TECPR1	648.473	-0.265536	0.057336	1
ENSMMUG00000001245	42.8871	0.839453	0.0575373	1
ENSMMUG00000000616	8.96281	1.19567	0.0575993	1
MYADM	7213.12	0.230968	0.0576111	1
CD1A	116.844	-1.61313	0.0577508	1
TRIP6	226.285	-0.335657	0.0577945	1
PCP2	164.805	-0.460886	0.0578106	1
PTCH1	329.139	1.26333	0.0579234	1
FITM2	17.146	0.760172	0.0580583	1
SHQ1	452.698	-0.297942	0.0582823	1
ENSMMUG00000056472	32.2856	-0.620213	0.0583449	1
SACM1L	944.237	-0.19771	0.058635	1
TMEM184A	109.369	-0.438667	0.0587438	1
FLT3LG	3023.09	0.202244	0.0587543	1
PCNX2	622.844	-0.289692	0.0587865	1
RBAK	339.732	-0.280396	0.0588713	1
PSTK	153.674	0.382486	0.0590596	1
RPL6	3371.28	0.212971	0.059385	1
MIPEP	391.034	0.362023	0.0594425	1
SGPP1	339.03	-0.244907	0.0594951	1
LDB3	43.9448	0.656172	0.0594965	1
AGPAT2	306.25	0.369926	0.0595419	1
GCAT	70.5398	-0.409593	0.0595592	1
IL22	18.3381	1.34399	0.0595894	1
BLOC1S3	65.87	-0.946021	0.0596685	1
SLC10A1	7.74244	-1.35333	0.0597284	1
LTBP3	1238.19	-0.303527	0.0597559	1
NASP	1091.09	0.254717	0.0598311	1
SLC16A5	401.675	-0.322961	0.0598888	1
SLCO4C1	52.3825	-0.628988	0.0601557	1
METAP1D	191.005	-0.265618	0.0603247	1
PRDM10	428.112	-0.279782	0.0603631	1
STK16	934.092	0.196445	0.060417	1
ACTG1	15558.6	0.408371	0.0604202	1
STMP1	264.632	0.354465	0.0605101	1
SBNO2	351.866	-0.43717	0.0605145	1
RNF217	22.8726	-0.932472	0.0605977	1
SETD3	767.484	0.231146	0.0607761	1
INTS2	315.602	-0.309543	0.0607954	1
ZNF19	33.4194	-0.541942	0.0608103	1
EGR1	634.445	0.535786	0.0608743	1
PKN3	36.3652	0.80918	0.0608821	1
ENSMMUG00000023096	44.827	0.768223	0.0609674	1
ENSMMUG00000050126	98.3425	-0.712659	0.0614505	1
SNX7	2.76658	-1.8322	0.0615438	1
ENSMMUG00000061551	14.7909	-0.913331	0.0616507	1
EVPL	24.4468	1.03978	0.0618003	1
ZNRD1	811.746	0.346926	0.0620966	1
RHOBTB1	165.543	-0.637114	0.0621886	1
STARD10	253.903	0.332188	0.0621924	1
ENSMMUG00000039874	282.939	-0.378765	0.0622435	1
B4GALT4	174.449	0.422531	0.062258	1
RREB1	788.421	-0.227883	0.0622742	1
RND1	61.1982	0.677787	0.0623183	1
FAM13B	708.268	0.469191	0.0623384	1
ECI1	366.8	0.40949	0.0626351	1
ATP5F1B	6157.35	0.160242	0.0628476	1
ARF1	13890	0.164067	0.0629649	1
PINX1	112.428	0.438217	0.0632282	1
CDH20	22.7517	-0.944105	0.0632497	1
ENSMMUG00000031000	18.7775	1.05376	0.0632873	1
ENSMMUG00000055851	42.2914	0.643019	0.0633385	1
ENSMMUG00000060287	21119.9	0.186744	0.0634707	1
POLR2E	1912.63	0.23848	0.0636366	1
ADAM11	13.7145	-1.20131	0.063936	1
ENSMMUG00000008695	1750.34	0.256347	0.0642473	1
SNORD46	34.5973	-0.761024	0.0643222	1
MYL6B	51.6949	0.468752	0.0644731	1
KRTCAP2	1155.41	0.203641	0.0645335	1
ENSMMUG00000018037	1043.35	0.288206	0.0645387	1
TNFRSF13B	146.223	0.68191	0.0646395	1
XKR5	4.34626	-1.73825	0.0646575	1
NCKIPSD	536.628	-0.31305	0.0646584	1
ETFB	1669.55	0.269436	0.0646662	1
ADGRL2	6.9607	1.74622	0.0646921	1
ENSMMUG00000060593	46.6887	1.16004	0.0648892	1
IQCG	52.0269	-0.478912	0.0650369	1
ANP32E	1045.18	0.237284	0.0650733	1
SCN1B	107.368	-0.712456	0.0650949	1
KIF3C	238.701	0.319221	0.065196	1
ENSMMUG00000045257	53.8596	-0.668425	0.0652075	1
ERO1A	1754.29	0.212212	0.0652316	1
PSMD13	2469.21	0.18373	0.0652912	1
AMIGO1	66.748	-0.42007	0.0653594	1
USP51	20.3079	-0.742585	0.0656183	1
ENSMMUG00000053166	22.38	1.13779	0.0656296	1
ZNF316	133.812	0.41266	0.0657675	1
ENSMMUG00000006818	4.52855	1.8248	0.0660216	1
AVPI1	668.687	0.293671	0.0660262	1
BPHL	200.291	0.480111	0.0661045	1
ENSMMUG00000065373	14.8581	-1.13855	0.0662755	1
STARD7	2467.57	-0.571121	0.0667676	1
CCNB1IP1	69.9763	-0.742077	0.0669267	1
KIAA1549	112.772	-0.657659	0.0669556	1
ENSMMUG00000023388	82.1567	0.454592	0.0669945	1
NLRC3	3011.64	-0.232221	0.0670303	1
HSPH1	3081.12	0.356041	0.0671111	1
ARRDC3	2186.94	-0.292013	0.0671135	1
ZNF749	1421.29	0.375351	0.0673209	1
GTDC1	454.476	0.248561	0.067365	1
IFNAR2	2424.27	0.329171	0.0675288	1
PDIK1L	60.0659	-0.486477	0.0677125	1
NOX1	5.89573	1.70152	0.0678541	1
TCL1A	28.7514	0.949361	0.0680165	1
PHGDH	387.494	0.296172	0.0680634	1
GIMAP6	5860.79	-0.319941	0.0680726	1
CDC42	5730.42	0.309107	0.0680863	1
ENSMMUG00000060522	96.2903	-0.411456	0.0681467	1
EGFL8	645.844	-0.289077	0.0683097	1
IMMP2L	191.725	0.285478	0.0683782	1
SLC9A9	1269.13	0.215867	0.0685515	1
HCN2	63.7358	-0.661358	0.0687437	1
ANKRD39	636.616	0.283432	0.0688098	1
RILPL2	1325.97	0.207746	0.0688519	1
ENSMMUG00000055704	30.5535	-0.761081	0.0689079	1
ELOVL5	2737.42	0.236246	0.0689241	1
HRH1	6.61918	-1.42543	0.0689443	1
ENSMMUG00000049824	735.25	0.246458	0.0690416	1
ENSMMUG00000061443	72.2179	1.86656	0.0690867	1
TADA2B	1205.3	0.24165	0.0691358	1
ENSMMUG00000056493	20.0894	-1.38989	0.0693621	1
CYP2U1	538.336	-0.253155	0.0693623	1
EMP3	4909.08	0.235686	0.0698565	1
AKAP14	1.57813	2.73701	0.0700506	1
LCMT2	82.1934	-0.412801	0.070055	1
NECAB3	88.1544	0.39134	0.0702321	1
USP13	70.1371	-0.500001	0.0702962	1
AKAP12	50.6744	0.866358	0.0703644	1
ENSMMUG00000051565	9.04442	1.33913	0.0704643	1
ENSMMUG00000061822	6.02825	1.65802	0.0705582	1
TANC1	1001.2	-0.407148	0.0705693	1
ATXN10	1972.37	0.21211	0.0707575	1
ENSMMUG00000007004	14.4974	0.81525	0.0708663	1
ENSMMUG00000061591	116.295	-0.402076	0.0709376	1
RHOA	9374.45	0.193572	0.0709737	1
TRAV2	199.004	0.516436	0.0709911	1
DOK5	10.5546	1.47841	0.071133	1
SPATA5L1	194.737	-0.384291	0.0711887	1
FLACC1	7.32983	-1.43586	0.0714521	1
ELK1	837.125	0.22051	0.0714573	1
LPCAT4	546.276	0.251259	0.0714957	1
INPP5A	548.279	-0.243779	0.0717795	1
CKAP2L	120.581	0.432186	0.072036	1
ZNF629	35.2116	-0.580785	0.0720779	1
SLC7A1	347.997	0.261443	0.0720871	1
ENSMMUG00000004318	7.00105	-1.29379	0.0722226	1
FKBPL	74.7654	0.50365	0.0722247	1
FXN	135.089	0.423208	0.0723921	1
NCOA7	1497.48	0.208357	0.0727699	1
ENSMMUG00000028906	3098.2	-0.20224	0.0728956	1
LRRC58	489.17	-0.463865	0.0729911	1
SLC41A1	1390.9	-0.247924	0.0731664	1
KCTD3	147.407	-0.413396	0.0731772	1
CD44	11080.9	0.249264	0.0732103	1
PPIA	7317.68	0.205167	0.0733057	1
MCF2L	499.45	-0.309354	0.0733269	1
ENSMMUG00000031191	4.24939	1.68507	0.0734472	1
SLC37A4	480.161	0.32721	0.0734853	1
CA5A	4.16431	-1.62543	0.0736064	1
ENSMMUG00000048215	170.884	0.298491	0.0736746	1
ENSMMUG00000022489	481.226	-0.513423	0.0738981	1
SMARCA2	3791.97	-0.179622	0.0743619	1
HOXB6	27.4725	-0.71518	0.0744042	1
GIPC1	47.0879	-0.610484	0.0744917	1
CASP10	722.511	-0.351794	0.074765	1
PTDSS1	1560.77	0.257041	0.0747807	1
PLCH2	52.8936	-0.905325	0.0748706	1
KNOP1	88.0289	-0.352462	0.0749101	1
MED23	1480.45	-0.223729	0.0749688	1
TUBA4A	15917	0.281924	0.0750481	1
DNAJC30	415.079	-0.238364	0.0751058	1
KPNA2	859.088	0.300734	0.0751514	1
ENSMMUG00000060270	10.9946	1.50113	0.0752087	1
YWHAZ	32954.1	0.176843	0.0754182	1
ATP5IF1	879.949	0.214452	0.0757541	1
LMAN1	1076.22	0.241483	0.0757641	1
MFGE8	49.4741	0.661733	0.0758122	1
U7.141	4.16837	-1.60893	0.0758569	1
SWT1	331.389	-0.372097	0.0760323	1
RFX8	86.1027	-0.865899	0.0762669	1
ROCK2	558.608	-0.253313	0.0763979	1
EZH1	508.143	-0.26506	0.0764624	1
NCAPH	484.714	0.3932	0.0768253	1
MAU2	2327.13	-0.167499	0.0770321	1
LINGO1	7.06038	1.41633	0.0771144	1
ICE2	497.18	-0.240753	0.0772396	1
ENSMMUG00000012523	866.762	0.377981	0.0772448	1
EPS8L2	70.1041	0.807197	0.0772798	1
DDR1	76.0494	0.46651	0.0773345	1
C4H6orf52	44.3277	0.64934	0.0774313	1
FAM156A	550.782	0.302856	0.0774777	1
CCDC63	5.10083	1.58703	0.0774937	1
ENSMMUG00000012407	19.5581	1.22941	0.0774966	1
GPD1L	887.17	0.228827	0.0776965	1
GGA3	2948.52	-0.161932	0.0778588	1
ENSMMUG00000050427	11.8312	-0.988633	0.0778765	1
IRF7	659.938	-0.508429	0.0780599	1
C1RL	46.5083	-1.07322	0.0782078	1
CDKL1	3.9107	1.85742	0.0783047	1
TCEAL4	6.71443	-1.16732	0.0783082	1
ANKRD16	107.124	0.519462	0.0784256	1
PGBD4	36.3404	-0.479486	0.0784515	1
TENT4B	530.738	0.221466	0.0785241	1
ENSMMUG00000023144	669.79	0.299108	0.0785242	1
PSMC5	4212.55	0.191672	0.078609	1
SPRY2	48.5813	-0.604983	0.0787853	1
ENSMMUG00000063761	496.123	0.308572	0.0790294	1
CD1B	143.796	-1.16793	0.0792855	1
BBC3	363.624	-0.387497	0.0793115	1
PPP3CB	170.711	0.33629	0.0793266	1
RANBP1	1211.12	0.209786	0.0793733	1
EZH2	634.826	0.21596	0.0795583	1
PAICS	686.498	0.452759	0.0796081	1
IRF6	73.5621	0.531389	0.0796716	1
CCDC141	8.46808	1.3173	0.0796775	1
ENSMMUG00000044354	98.6858	0.893713	0.0796918	1
STARD5	158.776	0.431258	0.0797466	1
CD177	24.4174	-0.939158	0.0797845	1
INTS6L	1343.08	-0.212143	0.0798399	1
ENSMMUG00000061194	13.0917	-0.873735	0.0798403	1
ZFP37	132.224	-0.464072	0.0798874	1
SMIM29	459.563	0.231076	0.0802844	1
C20H16orf58	374.326	-0.240529	0.0804645	1
FXYD1	7.28388	-1.13139	0.0804809	1
TMEM50A	2263.31	0.192403	0.0806502	1
MDK	244.716	-0.382333	0.0808417	1
MLX	206.366	-0.259229	0.0808935	1
RPL4	9083.15	0.187294	0.0809138	1
COA1	992.333	0.255644	0.0810174	1
HOMER3	26.1613	0.941971	0.081049	1
PPARD	1255.45	-0.289653	0.0813038	1
GCNT1	134.528	0.607572	0.081701	1
TBKBP1	95.9307	0.513357	0.0818236	1
RFESD	45.1192	-0.555438	0.0821028	1
ENSMMUG00000053324	6.08509	-1.28798	0.0821837	1
MSANTD2	137.313	-0.356933	0.0822526	1
SERPINA1	4047.76	0.493096	0.0822602	1
DHDDS	351.883	0.324126	0.0822802	1
ARSD	23.4627	0.623527	0.0822917	1
COX6B1	410.902	0.246442	0.0823672	1
MBD6	118.441	-0.407493	0.0824721	1
ENSMMUG00000049789	44.2217	-0.561375	0.0827117	1
COG4	516.144	-0.304537	0.0827602	1
NDUFB7	934.347	0.192364	0.0829981	1
ADAM23	109.668	0.604338	0.0831134	1
C11H12orf4	125.808	-0.394772	0.0832611	1
SIN3B	1176.09	-0.201124	0.0832812	1
COBLL1	26.9816	-0.760828	0.0833027	1
SIGLEC9	164.089	-0.547678	0.0833299	1
IVNS1ABP	5729.43	0.178958	0.083637	1
HOOK1	45.6395	0.766511	0.0837079	1
EEF1B2	4486.16	0.281267	0.0837985	1
PNP	366.839	0.390357	0.0837994	1
CFAP157	19.4173	-0.750944	0.0838456	1
ENSMMUG00000059070	9.83075	-1.37281	0.0840999	1
MAMDC2	50.0242	0.728446	0.0843343	1
ENSMMUG00000060973	66.5592	0.472472	0.0845411	1
ESR1	13.0444	0.936777	0.0845583	1
ENSMMUG00000044861	581.988	0.559365	0.084633	1
SHTN1	53.3175	-0.731763	0.0848863	1
MAGEH1	2909.04	0.328211	0.0849279	1
MTERF2	269	-0.301133	0.0850311	1
CD3EAP	111.592	-0.327557	0.085227	1
ACSL1	616.611	-0.352519	0.0852373	1
IK	3735.13	0.185683	0.0854793	1
PPM1G	1841.57	0.208942	0.0854882	1
TMEM150A	213.406	-0.251273	0.085559	1
TAF1C	1196.27	-0.245727	0.0855711	1
CCT3	2504.57	0.27909	0.0856945	1
CD52	18754.6	0.245937	0.0858184	1
AURKA	21.9483	0.785646	0.0858849	1
HACD2	396.576	0.300559	0.0859066	1
B4GALT2	210.345	0.354995	0.086021	1
EXOC4	986.568	0.22404	0.0860507	1
VPS33A	640.581	0.226071	0.0867212	1
ENSMMUG00000051744	12.578	1.17727	0.0867393	1
CTH	16.7069	-1.02763	0.0869799	1
TRAPPC4	950.316	0.344822	0.0870032	1
ZBTB39	132.152	-0.364954	0.0872096	1
SH2D5	18.9655	0.812422	0.0874119	1
CHPT1	114.479	1.09244	0.0875345	1
DNAJC10	1318.72	0.220306	0.0875769	1
ZNF608	25.9773	0.855779	0.0876109	1
ENSMMUG00000039205	8.55177	1.30243	0.0877154	1
KLHL13	29.128	-0.699443	0.0878871	1
FLYWCH1	446.23	-0.254971	0.0880198	1
EPB41	5644.75	0.274555	0.0885681	1
ZNF267	1528.09	-0.260571	0.0887846	1
GLRX	1176.52	-0.410743	0.0889167	1
MMP24	5.33976	1.66017	0.0889721	1
SRPRB	956.189	0.27391	0.0889918	1
YTHDC2	574.388	-0.230246	0.0890009	1
SLC39A8	580.615	-0.431443	0.089064	1
ENSMMUG00000059940	9.27534	1.37999	0.0891412	1
ENSMMUG00000057189	118.482	0.636932	0.0892417	1
ENSMMUG00000003272	124.813	-0.516256	0.0892631	1
YWHAB	11325.4	0.182071	0.0894852	1
ENSMMUG00000054005	16.8146	1.19968	0.0895488	1
DENND5A	4828.81	0.272985	0.0895784	1
OLFM2	17.5518	1.01456	0.0895796	1
COPS4	803.329	0.194812	0.0897706	1
TUBE1	249.739	-0.354446	0.0901384	1
OSBPL3	258.128	-0.303239	0.0902143	1
CLEC12A	118.458	1.7034	0.0902745	1
ENSMMUG00000058986	368.444	0.281042	0.0903111	1
ZBTB2	1504.74	0.194802	0.0904583	1
PELO	523.742	-0.272227	0.0908743	1
FADS2	12.4931	0.978773	0.0909117	1
CHPF	1318.37	0.293151	0.0909327	1
P2RY13	12.6636	-1.05667	0.0909515	1
CD40LG	470.205	0.32748	0.090982	1
EML4	3201.11	0.221301	0.0909872	1
PSMB1	4037.13	0.152609	0.0910088	1
UPP1	518.944	0.441106	0.0912109	1
TRBV6.1	686.19	-0.343793	0.0914435	1
BNIP3	111.459	-0.457549	0.0914653	1
ATP5F1A	17073.5	0.20445	0.091485	1
NME9	2.89569	-1.75717	0.0916257	1
XIRP2	3.21968	1.95079	0.0916934	1
ENSMMUG00000064092	82.6898	-0.835395	0.0917751	1
RIPK4	153.502	-1.08348	0.0917962	1
ENSMMUG00000042343	135.36	-0.644969	0.0918355	1
Metazoa_SRP.2641	3.19034	1.92054	0.0919317	1
LCN12	15.6758	0.982067	0.0919655	1
ENSMMUG00000046561	31.0989	-0.668616	0.0920719	1
EPOR	48.2519	0.453739	0.0922348	1
CRB3	99.984	-0.409553	0.0923196	1
HNRNPA1	7005.48	0.168342	0.0925267	1
LILRA5	82.6628	-0.710666	0.0926504	1
RAPGEF3	7.09745	1.40286	0.0926529	1
CCDC183	107.278	-0.420686	0.0926771	1
SSNA1	1034.78	0.252119	0.0928193	1
ANP32B	1264.38	0.22868	0.0928602	1
ENSMMUG00000011916	66.9044	-0.435645	0.0928777	1
XBP1	3032.66	0.211252	0.0929859	1
HAUS7	820.511	-0.228598	0.0930886	1
ENSMMUG00000060925	80.7155	0.610368	0.0931405	1
RNF115	865.029	0.159128	0.0931473	1
PLCD4	610.738	-0.381947	0.0931551	1
ATG101	661.394	0.220353	0.0931798	1
CTNNA1	263.599	-0.466344	0.0931995	1
SEC14L2	819.126	0.237438	0.093212	1
GLI4	142.653	-0.376022	0.0932622	1
XRCC6	10353.6	0.176525	0.0932892	1
GSPT1	2024.68	0.207375	0.0935574	1
ENSMMUG00000054505	10.7898	1.079	0.0936924	1
AK5	28.2182	0.711119	0.0939773	1
ENSMMUG00000008718	363.914	-0.303887	0.0940543	1
CERS2	1974.74	0.215775	0.0941146	1
ANK3	118.505	-0.496821	0.0943477	1
LAMTOR5	845.926	0.392646	0.0943653	1
ENSMMUG00000063007	20.6282	1.14975	0.0943919	1
UCK1	467.226	-0.24096	0.0945103	1
ENSMMUG00000056860	306.196	-0.219177	0.0945536	1
ZNF335	2434.14	-0.239885	0.0945585	1
TPT1	10096.9	0.238579	0.0945592	1
THOC1	267.254	-0.219287	0.094733	1
SNORD38A	7.20762	-1.11534	0.0948093	1
PIGL	79.9384	-0.362318	0.0948749	1
HES1	126.29	0.600132	0.0950484	1
FLT3	180.529	-0.627702	0.0951584	1
CNTNAP1	79.6476	-0.46753	0.0953207	1
VLDLR	30.2345	-1.03156	0.095479	1
HGF	9.69252	-1.12494	0.0956552	1
APBA1	9.7583	-0.888475	0.0956581	1
MOB3A	4484.3	0.214259	0.0956971	1
CHCHD2	1879.61	0.195635	0.0957198	1
TMEM203	1321.2	0.207977	0.0958314	1
NDUFAF7	253.382	-0.440962	0.0958579	1
ENSMMUG00000017270	394.17	-0.221632	0.0959761	1
NME2	4808.8	0.194939	0.096037	1
CYB5D2	397.802	-0.364196	0.0961139	1
MYO1C	899.209	0.432603	0.0962484	1
LPXN	1052.79	0.435972	0.0964561	1
SNORD83B	50.566	-0.584422	0.0966243	1
RPL7	9899.46	0.187942	0.096745	1
DUSP5	1085.9	0.391906	0.0967463	1
ENSMMUG00000063610	35.4023	-0.804329	0.096748	1
ZNF658	42.2782	0.633878	0.0968281	1
NMB	69.4115	-0.663046	0.0970677	1
WDR76	120.693	0.70719	0.0971052	1
RPS9	7727.33	0.239574	0.0971074	1
WWC2	45.4473	-0.675222	0.0971658	1
PHACTR2	344.989	0.233269	0.0971721	1
MCRIP2	161.866	-0.34593	0.0972578	1
MAMU.A	75462.4	-0.425651	0.0973413	1
ENSMMUG00000055584	3037.72	0.204836	0.0973549	1
CCDC124	701.963	0.22219	0.0977675	1
FCHO1	1772.02	-0.241176	0.0978062	1
ITPKB	3634.1	-0.231657	0.0978368	1
MEPCE	695.037	-0.203405	0.0978605	1
NFRKB	971.056	-0.277305	0.0979855	1
SLC45A3	91.9343	-0.834117	0.098134	1
MTPN	2027.11	0.177633	0.0982087	1
PPP1R18	952.443	0.365513	0.0982663	1
TNFRSF10A	3401.53	-0.260142	0.0988164	1
BCL2	2295.06	0.286321	0.0989979	1
ENSMMUG00000049295	2237.89	-0.281299	0.099	1
KARS1	3430.7	0.174624	0.0990422	1
HAT1	946.611	0.210487	0.0990684	1
AKT1S1	285.769	-0.225346	0.0993038	1
PRAG1	529.418	-0.379552	0.0993497	1
ENSMMUG00000006595	380.707	-0.263694	0.0993746	1
MYEF2	67.8137	0.388189	0.0997379	1
PTPN18	1294.63	0.197932	0.0997413	1
ELOF1	792.393	0.195285	0.0999021	1
IDUA	961.97	-0.359455	0.100036	1
MFHAS1	1516.32	0.374391	0.100416	1
ENSMMUG00000056427	19.0634	-0.645232	0.100593	1
ENSMMUG00000046892	8.83286	-0.976103	0.10068	1
MAMU.DOB	3604.39	0.321194	0.100731	1
RORA	1411.11	0.341426	0.100904	1
ENSMMUG00000060650	8.79769	1.05044	0.101109	1
AVEN	434.953	0.241644	0.101121	1
SIPA1L3	373.438	-0.261023	0.101218	1
LIMK1	173.688	0.420188	0.101734	1
NDNF	12.4418	1.11772	0.101779	1
AMIGO2	92.1054	0.518565	0.10184	1
CABP4	10.3621	-0.821742	0.101983	1
AARS2	460.859	-0.342512	0.102121	1
ZNF436	147.669	-0.345562	0.102213	1
Metazoa_SRP.2795	7.82204	-1.06709	0.102309	1
ENSMMUG00000058126	4.37878	-1.74975	0.102459	1
KIAA0355	1357.2	-0.22167	0.102534	1
PPP1R3F	232.579	-0.309215	0.102545	1
SREBF2	3065.3	0.347342	0.102613	1
ZNF160	588.098	-0.211976	0.102805	1
SH2D3A	156.333	-0.381687	0.102885	1
TRAT1	1210.71	0.254242	0.102956	1
GIPC3	235.501	-0.302364	0.103054	1
GIMAP8	2605.73	-0.252683	0.103215	1
U1.7	8.95923	-0.996292	0.103342	1
GPR174	313.02	-0.293557	0.103508	1
CKS1B	244.785	0.312004	0.103548	1
ACTN4	1145.68	0.356973	0.103604	1
ENSMMUG00000055825	473.69	0.335549	0.103671	1
SYT11	340.459	0.491645	0.103828	1
MRPL45	260.493	0.220993	0.103949	1
PMM1	522.086	-0.240472	0.104068	1
CITED4	77.0673	-0.51068	0.104201	1
ENSMMUG00000058818	106.784	0.342987	0.104219	1
NFX1	1261.24	-0.187216	0.104341	1
UBL3	2476.65	0.217924	0.104452	1
RPS4Y1	4701.64	0.177175	0.104494	1
FAM184B	92.6658	0.484548	0.104605	1
CDK2AP1	925.283	0.217537	0.104788	1
MTCP1	104.913	0.315926	0.10485	1
ABCA6	10.959	-1.09342	0.104882	1
TCEAL8	172.089	0.362255	0.104909	1
TMEM9B	1610.18	0.228179	0.104964	1
DCXR	673.74	-0.206345	0.10497	1
APCDD1	29.8861	0.729776	0.105197	1
MS4A1	1856.57	0.849516	0.105287	1
IGLV9.49	21.9268	1.08108	0.105326	1
GPR68	3.4596	1.76362	0.105395	1
TRAM1	5266.18	0.194184	0.105464	1
TRAPPC9	1140.36	0.203001	0.1055	1
CBLN3	12.5393	0.881115	0.105565	1
GSPT2	180.598	0.295538	0.105674	1
ENSMMUG00000060816	161.538	0.447868	0.105744	1
B3GNTL1	201.5	-0.226129	0.105773	1
TTC25	11.7747	-0.880492	0.105998	1
ENSMMUG00000029273	216.983	0.308255	0.106139	1
VDAC2	2061.91	0.185868	0.106168	1
ID1	91.9505	0.457976	0.106186	1
ENSMMUG00000059242	19.6177	-0.871991	0.106241	1
HTATSF1	1456.67	0.242677	0.106357	1
PCYT2	2358.16	0.214867	0.106363	1
Y_RNA.502	4.82776	1.54465	0.106367	1
KIAA1217	6.58489	1.58365	0.106396	1
ENSMMUG00000060892	130.341	0.751679	0.106532	1
GFM2	296.446	-0.303113	0.106674	1
NUP160	980.817	-0.296643	0.106759	1
FAM91A1	1014.43	-0.254527	0.107167	1
CD8A	326.705	-0.856365	0.107251	1
IGF1	7.21009	-1.37787	0.107253	1
ENSMMUG00000047378	146.084	0.28669	0.107429	1
ENSMMUG00000060110	229.595	0.98316	0.107431	1
WDCP	30.3673	-0.585455	0.107452	1
ATXN1	55.534	0.461965	0.107685	1
DMTF1	1689.71	-0.199084	0.107714	1
KIAA1549L	8.95111	1.42615	0.108104	1
PTEN	1295.97	0.256182	0.108323	1
C12orf43	98.2963	-0.420479	0.108407	1
ST3GAL1	4191.24	-0.194285	0.108523	1
RGS19	2705.85	0.209198	0.108605	1
ENSMMUG00000055985	30.5809	0.797046	0.108634	1
MYBL1	4.03801	1.70405	0.108779	1
TMEM187	67.4957	0.554459	0.109033	1
ENSMMUG00000031426	90.726	0.405895	0.109063	1
LINGO3	10.0771	-1.00093	0.109154	1
PPP2R5D	1167.68	0.248714	0.109179	1
ENSMMUG00000054064	4.40445	-1.43004	0.109258	1
ENSMMUG00000018557	983.682	0.188495	0.109649	1
CIR1	454.593	0.287838	0.109744	1
PYHIN1	1526.59	-0.273457	0.109845	1
ENSMMUG00000002200	41.5905	0.778304	0.109889	1
PM20D1	114.43	0.494747	0.110014	1
ENSMMUG00000031084	33.556	0.878697	0.110079	1
APC	713.539	-0.249353	0.110179	1
BCL7B	3432.98	0.180955	0.110229	1
ENSMMUG00000053836	74.6703	-0.398953	0.110294	1
CES1	9.29602	1.36002	0.110316	1
ENSMMUG00000057154	195.959	-0.619062	0.11032	1
NGFR	217.49	-0.556723	0.110422	1
PAQR6	79.5581	-0.43881	0.110542	1
EIF3I	1575.76	0.233624	0.110624	1
RAI1	205.992	-0.275514	0.110693	1
ANXA2	10309.2	0.301486	0.11072	1
PLA2G4B	3651.4	-0.280227	0.111076	1
CNTLN	13.4887	1.3364	0.111121	1
PORCN	164.16	0.254989	0.111191	1
ABCG1	1093.61	-0.298035	0.11131	1
ARFGEF1	515.82	-0.171207	0.111341	1
FAM185A	29.5131	0.675731	0.111472	1
ZC2HC1A	59.2425	0.475885	0.1115	1
DTWD1	118.571	-0.401078	0.111534	1
LIN54	263.005	0.227622	0.111585	1
IRF9	4253.44	-0.334193	0.11163	1
SLFN13	1668.66	-0.664539	0.111962	1
GNL3L	768.369	0.219244	0.111967	1
PRIMPOL	305.473	-0.309691	0.112223	1
FSIP1	7.38615	1.11036	0.112377	1
SLC3A2	3746.24	0.22693	0.112482	1
ENSMMUG00000003780	138.624	-0.525649	0.112512	1
CCSER1	8.66879	-0.91296	0.112576	1
SCN4A	63.3525	0.855346	0.112685	1
ENSMMUG00000060588	192.164	1.06555	0.112784	1
MANF	645.221	0.238733	0.112855	1
GTF2E2	1423.28	0.215426	0.112971	1
ENSMMUG00000058579	32.8533	-0.75644	0.113101	1
FAM214B	304.242	0.29118	0.113167	1
ENSMMUG00000054565	7.30817	-1.06066	0.113189	1
NPR2	122.048	-0.464649	0.113217	1
ECT2	110.214	0.404603	0.113234	1
ENSMMUG00000057862	19.3465	-0.933877	0.113361	1
LRRC34	13.8548	0.698972	0.113424	1
ENSMMUG00000055659	117.336	-0.547779	0.113578	1
CELSR3	9.39861	1.13547	0.113663	1
NUDT12	170.199	-0.325882	0.113871	1
RASGRF1	7.73772	1.27092	0.113896	1
ZNF343	389.468	-0.267916	0.114115	1
DRAM1	59.975	0.675137	0.114164	1
ENSMMUG00000055107	10.4976	-0.990906	0.11423	1
CCL5	409.29	-0.884452	0.114237	1
GPR183	20000	0.228052	0.114291	1
TNK1	651.225	-0.262165	0.114305	1
GSTK1	1673.78	0.238593	0.114512	1
PCDHB4	6.31882	1.185	0.114556	1
PARD6A	302.608	0.261772	0.11476	1
HGS	2810.93	-0.17251	0.114901	1
KLHDC8B	338.184	-0.26844	0.114932	1
ITM2C	587.317	-0.483388	0.114962	1
ENSMMUG00000051937	85.8198	0.497167	0.115003	1
ENSMMUG00000008658	5.20518	1.57586	0.115021	1
MCM3AP	2409.75	-0.208317	0.115132	1
N4BP1	1295.54	0.221064	0.11514	1
RNF146	358.079	-0.228769	0.115428	1
ENSMMUG00000040017	64.0104	0.718043	0.115457	1
HERC4	498.074	-0.220388	0.115483	1
COMMD1	290.648	0.223498	0.115493	1
ENSMMUG00000006738	252.107	-0.37318	0.115534	1
PPRC1	1490.8	-0.238728	0.115628	1
ENSMMUG00000056509	23.7478	-1.36457	0.115628	1
FUNDC2	833.87	0.184514	0.11575	1
ENSMMUG00000017111	84.7631	-0.437076	0.115761	1
ENSMMUG00000062350	4948.83	0.377032	0.11583	1
ENSMMUG00000057835	89.1238	0.374958	0.115885	1
TRIB2	5629.58	-0.213437	0.115895	1
PRKG1	5.51581	1.42488	0.115956	1
FAM204A	522.743	0.195504	0.116128	1
LARGE2	33.1507	0.617966	0.116164	1
ACP3	23.7197	-0.798175	0.116203	1
AP3M1	505.606	0.219979	0.116257	1
SSH2	2748.08	-0.291136	0.116304	1
IFIT5	393.827	-0.286897	0.116542	1
C19H19orf12	313.101	0.367265	0.116762	1
SUPT3H	153.68	0.285338	0.11677	1
ENSMMUG00000040742	4.01503	-1.37103	0.116896	1
REEP3	626.095	0.286657	0.116974	1
ENSMMUG00000061441	754.555	0.791863	0.116975	1
PIK3R3	16.6758	1.00691	0.116978	1
UBL4A	2901.21	0.184053	0.117033	1
KREMEN1	14.5461	-1.17665	0.117055	1
ENSMMUG00000057313	263.942	-0.89434	0.117121	1
SDF2	1190.14	0.32909	0.117239	1
PHLDB2	7.91722	1.03759	0.117299	1
FNDC11	122.158	-0.503795	0.117548	1
N6AMT1	59.4155	-0.390546	0.117568	1
SPINT2	3252.65	0.300799	0.117778	1
IFT22	83.2567	0.395948	0.118269	1
ENSMMUG00000053249	70.4392	0.391104	0.118345	1
CALU	1239.21	0.18368	0.118353	1
YJU2	567.189	-0.229283	0.118469	1
UBE2N	2396.27	0.204439	0.118478	1
VWA7	4.39771	-1.30822	0.11851	1
RAD51B	60.8526	-0.38165	0.118532	1
STARD13	6.56325	1.4187	0.118578	1
REXO4	459.484	-0.281721	0.118605	1
SELENOK	1091.51	0.250974	0.1187	1
MAP3K9	39.4164	-0.5135	0.119043	1
HARBI1	188.355	-0.363636	0.119073	1
PDGFRA	1346.21	0.172899	0.119126	1
ENSMMUG00000056811	162.177	-0.429658	0.11966	1
RNF121	215.985	-0.268637	0.119688	1
ECHDC3	13.2105	-1.12149	0.119745	1
MBIP	110.15	0.428816	0.119747	1
HINT1	2943.03	0.198848	0.11977	1
CHRNB1	139.062	0.2894	0.119805	1
TLNRD1	364.628	0.412669	0.119856	1
ST6GALNAC3	43.557	0.726936	0.120061	1
CERK	489.976	0.212768	0.120087	1
ENSMMUG00000001549	7.98061	1.38945	0.120217	1
RNF44	305.043	-0.258009	0.120435	1
ETV6	872.376	-0.219796	0.120606	1
CD151	1161.73	0.24392	0.12062	1
ENSMMUG00000056491	54.0858	-0.502441	0.120692	1
ENSMMUG00000062821	1315.69	-0.285022	0.120794	1
RTCB	1299.5	0.272799	0.120807	1
FADS1	108.377	0.355082	0.120923	1
CACYBP	3011.75	0.190833	0.120923	1
ENSMMUG00000049736	160.889	0.568463	0.121076	1
ALKBH3	454.021	-0.2226	0.121214	1
IGKV1D.42	20.0947	1.06059	0.121317	1
SREBF1	887.891	-0.394592	0.121325	1
CCR1	95.9145	-0.707745	0.121334	1
LILRA2	176.034	-0.486165	0.121382	1
ASPHD2	229.061	0.312989	0.121496	1
CNTD1	3.32618	1.65893	0.121498	1
ZBTB33	630.982	-0.228971	0.121703	1
UBQLN1	2183.07	0.174658	0.121714	1
ARG1	33.6652	0.889459	0.121719	1
KIAA1211L	20.9991	0.705767	0.121737	1
TXNDC9	306.159	0.253001	0.121828	1
HRH2	56.4733	-0.70876	0.121886	1
IHH	3.03357	1.87203	0.121892	1
ADPRM	271.136	-0.273372	0.121916	1
RPL13A	14785.4	0.176128	0.122133	1
MYDGF	1117.72	0.178947	0.122157	1
AMT	926.522	-0.173975	0.122247	1
S100A10	7243.49	0.233033	0.122322	1
SPG21	2821.4	0.312265	0.122625	1
ENSMMUG00000019238	6193.06	0.199449	0.122978	1
EREG	51.8465	-0.840974	0.123012	1
ENSMMUG00000057963	18.1166	0.785903	0.1231	1
SPCS2	1012.75	0.236982	0.123392	1
ARHGAP27	284.454	-0.277722	0.123406	1
PDE6D	299.913	0.225571	0.123451	1
ENSMMUG00000058952	305.596	-0.340049	0.123583	1
NOP9	834.709	-0.250553	0.123633	1
ENSMMUG00000021460	114.311	-0.320336	0.123659	1
RIMKLB	40.8503	-0.48855	0.123881	1
NUP50	1688.68	0.252378	0.123946	1
SENP5	1019.43	-0.195441	0.124114	1
ENSMMUG00000053510	551.132	0.880377	0.124216	1
PHF6	433.143	-0.222488	0.124247	1
ENSMMUG00000051545	1061.57	-0.401163	0.124429	1
MEX3A	23.3512	-0.61224	0.124437	1
MSMO1	620.908	0.254019	0.124518	1
BOD1	176.141	0.267927	0.124555	1
GLTP	3141.67	0.174585	0.124572	1
KMT5A	861.977	0.22065	0.124779	1
TMEM59	4661.54	0.146577	0.124842	1
H1.1	4.91523	-1.34356	0.124926	1
ENSMMUG00000038348	51.8515	-0.983162	0.124935	1
CRK	149.923	-0.337099	0.124941	1
PCSK6	13.1506	-0.852307	0.124969	1
EIF3D	2483.48	0.172899	0.125016	1
CR2	816.787	0.361063	0.125072	1
DOCK7	41.8913	0.467761	0.125177	1
GMEB2	781.406	-0.189486	0.125214	1
TBCB	897.752	0.275107	0.125234	1
LMO4	146.557	0.510729	0.125244	1
PRR15	4.74811	-1.09762	0.125299	1
RAD9A	651.422	-0.257754	0.125323	1
NCL	8552.53	0.13145	0.125416	1
CD2	2586.08	0.228426	0.125449	1
ENSMMUG00000061174	21.665	0.704063	0.125538	1
C7H15orf61	1671.61	0.234555	0.125556	1
GLIPR2	5949.99	0.206522	0.125625	1
GCN1	16587.7	0.162801	0.125928	1
GPRC5B	32.9875	1.06436	0.125994	1
MCM6	593.51	0.20585	0.126021	1
TRUB2	775.382	-0.162684	0.126026	1
ENSMMUG00000053726	7.54667	-1.13251	0.126113	1
FTH1	22050.4	0.215917	0.12636	1
RBM19	1418.02	-0.237174	0.126376	1
TBC1D23	538.633	-0.31811	0.126379	1
MRPL21	234.967	0.261573	0.126628	1
ZNF841	454.105	-0.251428	0.126658	1
HMGB1	5267.31	0.153574	0.126673	1
ENSMMUG00000014692	1250.63	-0.234716	0.126674	1
MTDH	1653.11	0.175159	0.126815	1
ENSMMUG00000008632	2172.91	0.162587	0.126865	1
COX8A	1723.21	0.181648	0.126889	1
KLF10	3311.85	0.352415	0.126922	1
LAPTM5	31099.6	0.159563	0.127162	1
LRCH1	329.687	0.238388	0.12764	1
ENSMMUG00000050804	13.8108	-0.932819	0.127701	1
ENSMMUG00000061622	13.2486	0.808713	0.12792	1
AKT3	187.076	0.341853	0.127936	1
NHLRC3	337.628	0.20706	0.12797	1
GFRAL	11.2389	0.913791	0.128074	1
LRRC27	164.804	0.340021	0.128101	1
RNFT1	497.38	-0.260863	0.128131	1
Metazoa_SRP.1058	4.46219	1.56038	0.128456	1
PMVK	694.635	0.315976	0.12871	1
ATP1B3	1908.47	0.218949	0.128881	1
AACS	1290.22	0.250199	0.128883	1
TMEM249	11.2678	-0.909539	0.12897	1
SLC25A43	4311.39	0.168946	0.129023	1
C3H21orf91	1061.64	-0.256666	0.129404	1
SLC27A5	93.8163	0.425545	0.129556	1
AKT2	377.295	-0.230548	0.129577	1
TUSC2	1342.63	0.181085	0.129604	1
NIT2	481.14	0.471623	0.1297	1
C1orf109	164.747	-0.311158	0.129877	1
ZNF528	964.178	-0.218361	0.130275	1
DMAC2L	158.83	-0.337775	0.130404	1
ENSMMUG00000064018	47.7303	-0.872913	0.130447	1
RPGRIP1L	19.8845	0.752258	0.130453	1
ENSMMUG00000052291	71.7922	0.518922	0.130473	1
METTL16	361.141	-0.264351	0.130529	1
RNase_MRP	17.3352	0.740789	0.13056	1
E2F8	14.4688	0.852319	0.1306	1
RPL36AL	2006.74	0.180698	0.130649	1
CCNG2	943.449	-0.356309	0.130687	1
ENSMMUG00000056067	3.1881	-1.4537	0.130746	1
SPIDR	515.605	0.310151	0.130939	1
PLP2	1570.33	0.267181	0.130966	1
LDLRAD4	922.869	-0.317871	0.131123	1
MTMR8	24.1006	0.643008	0.131148	1
ERRFI1	252.794	-0.308214	0.131251	1
SELENOM	282.894	-0.47113	0.131286	1
ENSMMUG00000017266	149.768	0.339564	0.131327	1
POGLUT1	838.712	0.314949	0.131782	1
CSNK1G3	695.147	0.271545	0.131923	1
ENSMMUG00000057623	166.438	-0.480912	0.132005	1
ZNF366	22.8954	-1.22841	0.132162	1
GPR34	18.4135	-0.602781	0.132166	1
GET3	1602.53	0.212895	0.132184	1
LARS2	241.044	0.234185	0.132289	1
H1.0	293.509	0.398336	0.132312	1
NANS	684.829	0.317573	0.132388	1
PHLDB3	90.3753	-0.360938	0.132507	1
ENSMMUG00000011868	61.0737	0.499231	0.132521	1
ZNF177	151.114	0.618665	0.132545	1
GNG5	1278.82	0.183828	0.132723	1
LUC7L3	498.564	-0.246749	0.132771	1
CD200	338.473	0.436398	0.132773	1
MYC	981.043	-0.294523	0.13283	1
DIRAS2	81.5404	0.516802	0.13284	1
TMEM71	1366.31	-0.142284	0.132858	1
CCT8	1724.71	0.168541	0.133031	1
KLC4	505.206	-0.199697	0.133169	1
GMDS	600.279	0.23388	0.133904	1
FAM168B	1753.07	-0.136378	0.134095	1
TSPAN18	22.6456	0.891877	0.134161	1
DGKA	13172.2	-0.160753	0.134188	1
FZD2	18.3562	0.841999	0.134479	1
STK39	630.116	0.214899	0.134509	1
CALY	274.359	0.448871	0.13453	1
PRR3	102.027	0.266862	0.134619	1
SPIN4	9.47311	0.95675	0.134719	1
PDK1	1166.52	-0.298167	0.134838	1
ENSMMUG00000055207	38.1704	0.845867	0.134863	1
SPATA48	5.81719	-1.234	0.134878	1
IL17RE	33.5861	0.670858	0.1349	1
LRCH3	932.444	-0.235071	0.134965	1
MBLAC2	100.901	-0.347866	0.13499	1
TMEM131L	2848.22	-0.174311	0.135027	1
HCFC1R1	16.5182	0.838932	0.135127	1
EFHB	54.4051	-0.512577	0.135207	1
TMEM140	41.6494	-0.612525	0.135221	1
ID2	11415.4	-0.29181	0.135313	1
TIMM21	245.063	-0.253844	0.135358	1
ENSMMUG00000002887	3.33353	-1.57591	0.13543	1
HDAC3	1879.39	0.276565	0.135436	1
FANCM	379.647	-0.224271	0.135534	1
CCDC117	357.56	-0.211711	0.135555	1
PSMA2	3053.21	0.170791	0.13556	1
PLAT	4.36233	1.59919	0.135632	1
CHD5	5.13199	1.55091	0.13569	1
ENSMMUG00000020643	674.59	0.301769	0.135741	1
GAS6	226.375	-0.566248	0.136153	1
KCNK1	28.9313	0.761842	0.136212	1
ENSMMUG00000064873	450.873	-0.414656	0.13622	1
KIF5C	7.961	1.12919	0.136234	1
FNDC3B	172.52	-0.416205	0.136426	1
CHSY1	379.892	-0.362172	0.136623	1
CPE	34.59	0.984224	0.136638	1
ENSMMUG00000056602	5.4519	-1.08866	0.136699	1
EFNA1	16.5061	-0.683135	0.136752	1
EEF1G	15532.7	0.189419	0.136898	1
BCL2L11	984.705	0.290503	0.136934	1
CCM2L	9.96337	1.0347	0.136956	1
DTHD1	15.1383	0.943248	0.13701	1
CAMSAP1	346.379	0.337554	0.137079	1
TSPAN31	1159.52	0.238738	0.137087	1
BAALC	3.81861	1.55088	0.137237	1
KIAA0513	529.449	-0.274565	0.13732	1
Metazoa_SRP.933	28.2148	-0.702807	0.137433	1
DACT3	3.3157	-1.34192	0.137608	1
ARMCX3	402.406	-0.191212	0.13785	1
ENSMMUG00000054173	5.36733	-1.24595	0.138201	1
ZNF224	523.432	-0.219826	0.138206	1
ENSMMUG00000022075	2318.94	0.191936	0.138274	1
URI1	1540.07	0.188529	0.138333	1
ETAA1	531.232	-0.255667	0.138457	1
C8orf82	243.966	0.396108	0.138539	1
TTC36	3.67528	-1.35563	0.138699	1
CGAS	132.784	-0.264868	0.138703	1
H4C4	2.83381	-1.59099	0.138727	1
SPATA6L	24.1485	0.64489	0.138801	1
ENSMMUG00000064215	128.212	0.419455	0.138872	1
ARID5B	2299.32	-0.190669	0.138892	1
FCRL5	202.75	0.580726	0.138923	1
PSMB4	764.877	0.202789	0.139072	1
TRAF3	995.005	0.189107	0.139204	1
TMEM120B	250.08	-0.279804	0.139219	1
CYP4V2	244.507	0.295421	0.139316	1
GSTT2B	561.307	0.257145	0.139418	1
CCL18	3.73732	-1.45683	0.139431	1
SPATA7	77.8624	0.385953	0.139488	1
MYO7B	5.82008	1.5044	0.139582	1
SHB	77.2842	0.472046	0.139602	1
DNMT3B	59.8424	-0.446582	0.139605	1
PRELID3A	6.32321	1.09166	0.139639	1
PBX3	251.666	0.226456	0.139681	1
LTB4R2	13.753	-0.68871	0.139758	1
ZC3HAV1	5080.91	-0.164831	0.139796	1
ENSMMUG00000010236	1147.56	0.286547	0.139832	1
TLDC2	5.30764	-1.17157	0.139857	1
GTF3C3	531.838	-0.179124	0.139869	1
SRXN1	13.744	-0.759313	0.140114	1
SAV1	257.774	0.515663	0.140184	1
RSRP1	2095.74	-0.341797	0.140228	1
PPP1CA	6813.92	0.237849	0.140229	1
CD3E	2523.67	0.246794	0.140268	1
ENSMMUG00000000167	864.951	-0.243846	0.140272	1
ROCK1	2720.47	0.143684	0.1403	1
PAXBP1	617.483	-0.236398	0.140328	1
AGER	67.0771	-0.335434	0.140391	1
ENSMMUG00000058358	13.856	-0.626857	0.140541	1
OARD1	548.835	0.212448	0.140552	1
CHAMP1	658.54	-0.21764	0.140631	1
FHL2	139.503	0.447574	0.140652	1
ENSMMUG00000046772	22.6157	0.605047	0.14069	1
ZNF212	720.801	-0.18798	0.140737	1
UBL5	1789.54	0.16833	0.14075	1
MACO1	354.858	0.232888	0.140865	1
ZNF543	38.9964	0.461414	0.141045	1
ACTN3	193.137	0.429064	0.141176	1
ENSMMUG00000032370	19.1284	-0.65678	0.141206	1
PTPRS	235.269	-0.464056	0.141338	1
ENSMMUG00000001645	5541.1	0.1836	0.141353	1
TLR8	8.85272	-1.04612	0.141419	1
AXL	187.383	-0.552212	0.141419	1
ENSMMUG00000054134	6.46212	1.34927	0.141462	1
ZCCHC14	136.532	-0.327526	0.141467	1
GNPTG	771.697	0.149935	0.14148	1
GUCY1B1	66.4439	0.634317	0.141777	1
EDF1	1884.87	0.15909	0.141842	1
JAK2	1269.99	-0.236972	0.141845	1
C1QL3	27.9802	0.633792	0.142123	1
Metazoa_SRP.2323	2.19818	-1.58249	0.142285	1
ENSMMUG00000059525	33.8451	0.802984	0.142345	1
SRI	1981.27	0.187489	0.142363	1
KDF1	42.0231	-0.706251	0.142469	1
ANKDD1B	31.0535	-0.756203	0.142531	1
MDH2	2495.13	0.213886	0.142571	1
ENSMMUG00000056950	194.966	0.507292	0.142676	1
SKA3	17.5568	-0.6532	0.142699	1
WDR45	1000.83	0.152898	0.142808	1
ECT2L	4.55569	1.42488	0.142961	1
C1QTNF6	11.2814	1.15289	0.143138	1
SLC16A14	14.4707	0.708239	0.143371	1
MED30	1069.24	0.27924	0.143484	1
ANKRD13D	1003.63	-0.184463	0.143514	1
CAVIN3	57.6826	-0.542508	0.143581	1
QARS1	2520.15	0.165257	0.143688	1
MED25	1718.74	0.248397	0.143786	1
RAB27A	803.619	0.246638	0.143865	1
PGM3	401.472	-0.195534	0.143914	1
CEL	6.70254	1.05879	0.143919	1
AASDH	313.284	-0.279016	0.144027	1
PASK	400.651	0.310758	0.144205	1
SNORD16	6.95492	-1.11032	0.144268	1
HSP90B1	4393.57	0.15673	0.144304	1
CENPC	397.348	-0.264142	0.144422	1
ENSMMUG00000054409	152.601	0.534104	0.144514	1
PIK3IP1	5363.59	-0.213655	0.144548	1
GABRB3	6.6504	1.37155	0.144746	1
ENSMMUG00000064176	5.8285	1.21782	0.144831	1
STARD3NL	288.794	0.232262	0.144903	1
LRRC14B	9.84576	-0.876506	0.145187	1
TOP3A	1015.34	-0.216648	0.145319	1
TRBV5.4	21.0364	0.802619	0.145726	1
TEDC1	2917.38	-0.222513	0.145745	1
H1.4	330.529	0.291651	0.145892	1
EIF3M	1614.5	0.194156	0.145978	1
ATAD1	568.071	0.193624	0.145992	1
LEO1	364.979	0.204847	0.146007	1
EVI5	39.7725	0.623473	0.146236	1
ENSMMUG00000043246	9.59781	1.09628	0.146273	1
GSDMD	3450.15	0.21038	0.146324	1
ENSMMUG00000062515	115.701	0.263219	0.146557	1
PEAK1	37.3485	-0.464917	0.146645	1
ADPRH	108.67	0.511801	0.146748	1
ATF7IP2	745.99	-0.442248	0.146799	1
ZKSCAN8	88.5531	-0.40565	0.146874	1
ENSMMUG00000035871	16.9131	-0.721859	0.146928	1
LILRA6	25.0832	-0.920692	0.146965	1
ENSMMUG00000049687	5.04993	-1.21261	0.147021	1
ANK1	21.8599	0.704931	0.14707	1
ENSMMUG00000045208	1880.41	1.0915	0.147095	1
SHBG	6.2643	1.58106	0.14745	1
ENSMMUG00000051540	23.6599	-0.539848	0.147485	1
LIPA	1039.4	0.223744	0.147648	1
ENSMMUG00000060606	50.7585	0.8792	0.147969	1
NDOR1	262.651	-0.270254	0.148009	1
TMX2	193.172	0.324866	0.148013	1
ENSMMUG00000008383	794.086	-0.161029	0.148091	1
UBB	26569.1	0.179019	0.148294	1
ZNF562	22.3306	-0.736188	0.148317	1
ZMYND19	386.133	0.23385	0.148391	1
MAFF	1116.5	-0.305765	0.148406	1
NEXMIF	5.78694	1.26128	0.148547	1
IPO9	1615.49	-0.132903	0.148706	1
PDE1A	122.871	-0.513015	0.148709	1
CREBZF	381.159	-0.217902	0.148902	1
CD83	5261.05	0.363725	0.148947	1
GIGYF1	419.236	-0.209384	0.149065	1
NAXD	1007.22	0.257926	0.149093	1
EEF2	18124	0.222468	0.149135	1
DMD	64.8332	0.628521	0.149144	1
CA11	125.016	0.293586	0.149291	1
GRTP1	6.07246	-1.13158	0.149309	1
ATP13A2	2245.99	-0.244667	0.149503	1
MTMR10	307.892	-0.313433	0.14957	1
HOXC4	3.36938	-1.43037	0.149815	1
SNAI1	39.6232	-0.676406	0.149936	1
CCDC121	43.1363	-0.417917	0.150176	1
MGAT4B	1442.17	0.213457	0.150224	1
PIP4P2	18.6649	-0.615847	0.150626	1
TPPP	332.008	0.453468	0.150633	1
CTC1	1968.94	-0.22182	0.150678	1
SLC38A9	212.925	-0.227794	0.150694	1
ENSMMUG00000053608	10.0232	-0.874557	0.15074	1
CLIC5	208.055	0.467412	0.150814	1
TMEM258	879.41	0.305394	0.150879	1
HIP1	160.79	-0.485994	0.150978	1
TMSB10	20340.7	0.198536	0.150985	1
COL5A1	48.13	-0.581123	0.15101	1
FGD3	11945.7	-0.198267	0.151028	1
ENSMMUG00000002133	1963.56	0.17104	0.151163	1
RAB11FIP5	256.361	0.399466	0.151254	1
POLD2	1271.22	0.212525	0.151367	1
SKI	197.979	0.260111	0.151665	1
ENSMMUG00000060763	19.3005	0.646018	0.15173	1
ENSMMUG00000062328	157.642	0.581978	0.151827	1
CLTB	1000.58	0.196569	0.151964	1
HGD	21.7464	-0.71388	0.151994	1
FAM110C	5.77991	-1.273	0.152226	1
ITGB1	10257.9	0.412006	0.152329	1
GALR2	22.9046	0.795008	0.152347	1
DYRK3	218.697	0.259035	0.15262	1
GOLGB1	742.463	0.26415	0.152813	1
ARL3	159.254	0.217968	0.152978	1
PIK3R5	3166.97	0.394388	0.153066	1
PHTF1	634.286	0.264219	0.153123	1
LIMS2	10.1751	0.949718	0.153394	1
SOD1	2142.38	0.204675	0.153551	1
ENSMMUG00000062866	8.2115	1.20339	0.153632	1
VPS35L	540.324	0.253229	0.153797	1
ATP6V1C2	46.2479	-0.481678	0.153969	1
DNASE1L1	290.747	0.272316	0.154071	1
TKT	3647.95	0.184391	0.154079	1
WIF1	24.8023	0.697544	0.154085	1
ACAA1	657.419	-0.235254	0.154198	1
RTF2	681.016	0.1918	0.154537	1
SFT2D1	1170.12	0.132505	0.15467	1
ENSMMUG00000061959	183.096	-0.495339	0.154672	1
CDC42BPG	131.075	-0.308171	0.154696	1
ZBED8	45.5138	-0.47403	0.154805	1
GFPT1	263.421	-0.234775	0.154851	1
ENSMMUG00000041459	40.5891	-0.435777	0.155078	1
ZFYVE27	1199.52	-0.205253	0.155083	1
DDX41	1053.6	0.244789	0.155246	1
RPS17	7722.19	0.198645	0.155255	1
RPRD2	1847.47	-0.169335	0.155265	1
ENSMMUG00000051443	36.0407	0.548674	0.155405	1
SYNJ2	35.1213	0.52161	0.155468	1
CAPG	16235.1	0.265235	0.155515	1
DENND2A	107.842	0.505004	0.155593	1
PC	203.019	-0.271299	0.155606	1
ZNF256	851.233	-0.2278	0.155636	1
SEMA3C	2.94945	1.70785	0.155747	1
ENSMMUG00000055079	15.8749	-0.733241	0.155749	1
CEP76	281.267	-0.267853	0.155797	1
INTS5	597.149	0.165224	0.15582	1
ENSMMUG00000057266	22.8693	-0.555812	0.155862	1
ANKRD26	137.321	-0.292559	0.155887	1
ENSMMUG00000050723	50.2063	0.404069	0.156076	1
FBXW11	1403.35	-0.14875	0.156133	1
FLOT1	2047.54	0.224158	0.156367	1
FAF1	1109.73	0.148602	0.156388	1
BCAS3	1258.7	0.18319	0.156733	1
CNGA1	3.47583	1.43575	0.156873	1
FBXO32	107.125	0.525878	0.156955	1
ENSMMUG00000057062	381.085	0.311475	0.156981	1
SH3KBP1	3561.6	0.195168	0.157024	1
GOLT1B	284.808	-0.225669	0.157148	1
SPRED1	10.9518	-0.777017	0.157168	1
LYPD3	32.5538	-0.609286	0.157299	1
PRSS22	2.27331	1.91659	0.157392	1
DGCR6L	190.381	0.242807	0.157458	1
TRMT2A	2007.68	-0.19759	0.157717	1
UBE2Q1	1772.22	0.1475	0.158006	1
CREBL2	701.092	0.356063	0.158339	1
SGTB	80.7904	0.374664	0.15837	1
PRDX6	2041.28	0.218602	0.158412	1
BACH2	926.53	-0.258166	0.158591	1
ZNF774	3.4819	1.44166	0.158694	1
ENSMMUG00000055795	7.83565	-0.982476	0.15873	1
ENSMMUG00000060636	79.2026	-0.477835	0.158951	1
ENSMMUG00000057691	226.49	-0.338421	0.159026	1
B4GALT3	703.311	-0.156054	0.159083	1
NOL8	1358.09	0.144189	0.159327	1
PRPS1	874.807	0.188071	0.15934	1
SSH3	122.844	-0.348795	0.15944	1
ENSMMUG00000063294	8.22843	1.08637	0.159487	1
OTOG	612.138	-0.329575	0.159492	1
TLR9	131.397	0.53087	0.15952	1
ENSMMUG00000057006	5.3775	1.30359	0.159714	1
NUBP1	228.618	-0.214103	0.16024	1
UBE2K	594.667	0.20421	0.160277	1
NIPSNAP2	921.558	-0.173387	0.160431	1
MMUT	265.8	-0.189057	0.160438	1
SNORD88B	3.67057	-1.20739	0.160518	1
MCUR1	113.879	0.299033	0.16056	1
ZNF773	35.087	0.541642	0.160705	1
POP1	111.63	-0.374188	0.16073	1
SLC15A1	15.3392	1.01104	0.160801	1
ENSMMUG00000057110	1075.88	0.700623	0.160871	1
ENSMMUG00000057878	11.0492	0.793452	0.161107	1
SERTAD1	4011.87	0.3026	0.161239	1
MRPS28	149.893	0.264909	0.161272	1
ENSMMUG00000053369	2.72292	1.66303	0.16147	1
CPED1	24.2426	0.593188	0.161537	1
DLEC1	10.6903	1.08313	0.16154	1
Metazoa_SRP.2140	5.31124	-0.9765	0.16155	1
CCDC184	160.858	0.492777	0.161584	1
TMEM230	1178.89	0.217862	0.161612	1
ENSMMUG00000019109	20.0694	-0.8579	0.161763	1
SLC15A2	47.3291	-0.572011	0.161775	1
UBE2E1	223.143	-0.223619	0.161924	1
ENSMMUG00000062884	46.1383	0.429485	0.161925	1
ENSMMUG00000042225	12.9652	-0.93704	0.162204	1
CD101	206.437	-0.510134	0.162281	1
ENSMMUG00000019087	76.1212	0.585487	0.162696	1
PDCD1LG2	16.5635	0.678603	0.162699	1
TARBP1	475.343	-0.238745	0.162765	1
ENSMMUG00000062310	151.511	-0.301025	0.162845	1
SMYD3	348.676	0.271952	0.163419	1
VAMP7	959.122	0.173951	0.163478	1
ASIC2	3.30084	1.37901	0.163549	1
CTSO	330.241	0.22786	0.163552	1
PDE4A	542.631	0.2777	0.163556	1
NID2	16.4141	-0.726176	0.163623	1
ARL9	12.4233	0.953653	0.163706	1
GTF3A	580.955	-0.193272	0.16384	1
MVB12A	587.103	-0.169741	0.163843	1
SETD4	209.7	-0.212927	0.163862	1
CAPZA1	2466.8	-0.308937	0.163896	1
ATG12	1372.68	0.205137	0.163912	1
SLC22A17	691.383	-0.354565	0.164259	1
SCT	44.198	-0.728129	0.164292	1
TALDO1	4561.09	0.169163	0.164549	1
COMMD10	341.251	0.204352	0.16455	1
KCND1	117.215	0.326292	0.16468	1
DHX37	759.738	-0.189794	0.164697	1
ENSMMUG00000054212	7.11799	1.13979	0.164804	1
HDHD2	300.959	0.284862	0.164816	1
FAM162A	248.957	-0.292789	0.164915	1
AGR3	24.6194	0.977436	0.164964	1
U2AF2	520.905	0.201058	0.164985	1
CORO2A	738.596	0.307739	0.165016	1
SLC35F5	153.879	0.309598	0.16506	1
GPRIN2	17.4936	1.22712	0.165077	1
ERP44	2011.79	0.133348	0.165224	1
CCKBR	32.7844	0.479553	0.165245	1
CANX	2377.44	0.234307	0.165372	1
TBC1D22A	522.644	-0.205539	0.165415	1
FHAD1	6.62901	0.95448	0.165421	1
PAFAH1B1	1586.3	0.141998	0.165458	1
CDAN1	952.914	-0.240352	0.165494	1
SOX5	39.3476	0.623058	0.165527	1
EXOC2	827.178	0.167841	0.165592	1
UFC1	1395.45	0.155295	0.16567	1
CDH23	192.927	0.538503	0.165849	1
ACSF3	618.31	-0.209574	0.166092	1
ENSMMUG00000014947	5.76059	-1.29386	0.166113	1
ENSMMUG00000060651	3.29302	-1.27293	0.166137	1
ZNF34	68.3308	-0.399835	0.166173	1
FXR1	810.863	0.158236	0.166196	1
[truncated: 33,442 more rows]
